# Supplementary material
Source: publisher figshare collection journal article supplement (https://acs.figshare.com/ndownloader/files/10270608)
Supplement: Supplementary file 1 [file 10270608]

 
data_mo_dm17392_0m 
  
_audit_creation_method            SHELXL-2013 
_chemical_name_systematic 
; 
 ? 
; 
_chemical_name_common             ? 
_chemical_melting_point           ? 
_chemical_formula_moiety          ? 
_chemical_formula_sum 
 'C26 H22 Br2 O4' 
_chemical_formula_weight          558.25 
  
loop_ 
 _atom_type_symbol 
 _atom_type_description 
 _atom_type_scat_dispersion_real 
 _atom_type_scat_dispersion_imag 
 _atom_type_scat_source 
 'C'  'C'   0.0033   0.0016 
 'International Tables Vol C Tables 4.2.6.8 and 6.1.1.4' 
 'H'  'H'   0.0000   0.0000 
 'International Tables Vol C Tables 4.2.6.8 and 6.1.1.4' 
 'O'  'O'   0.0106   0.0060 
 'International Tables Vol C Tables 4.2.6.8 and 6.1.1.4' 
 'Br'  'Br'  -0.2901   2.4595 
 'International Tables Vol C Tables 4.2.6.8 and 6.1.1.4' 
  
_space_group_crystal_system       monoclinic 
_space_group_IT_number            14 
_space_group_name_H-M_alt         'P 21/n' 
_space_group_name_Hall            '-P 2yn' 
  
_shelx_space_group_comment 
; 
The symmetry employed for this shelxl refinement is uniquely defined 
by the following loop, which should always be used as a source of 
symmetry information in preference to the above space-group names. 
They are only intended as comments. 
; 
  
loop_ 
 _space_group_symop_operation_xyz 
 'x, y, z' 
 '-x+1/2, y+1/2, -z+1/2' 
 '-x, -y, -z' 
 'x-1/2, -y-1/2, z-1/2' 
  
_cell_length_a                    13.8138(14) 
_cell_length_b                    10.2034(10) 
_cell_length_c                    17.2024(18) 
_cell_angle_alpha                 90 
_cell_angle_beta                  91.600(2) 
_cell_angle_gamma                 90 
_cell_volume                      2423.7(4) 
_cell_formula_units_Z             4 
_cell_measurement_temperature     296(2) 
_cell_measurement_reflns_used     4138 
_cell_measurement_theta_min       4.642 
_cell_measurement_theta_max       45.948 
  
_exptl_crystal_description        prismatic 
_exptl_crystal_colour             colorless 
_exptl_crystal_density_meas       ?
_exptl_crystal_density_method     ? 
_exptl_crystal_density_diffrn     1.530 
_exptl_crystal_F_000              1120 
_exptl_transmission_factor_min    ? 
_exptl_transmission_factor_max    ? 
_exptl_crystal_size_max           0.200 
_exptl_crystal_size_mid           0.170 
_exptl_crystal_size_min           0.120 
_exptl_absorpt_coefficient_mu     3.374 
_shelx_estimated_absorpt_T_min    0.552 
_shelx_estimated_absorpt_T_max    0.688 
_exptl_absorpt_correction_type    multi-scan 
_exptl_absorpt_correction_T_min   0.4166 
_exptl_absorpt_correction_T_max   0.7345 
_exptl_absorpt_process_details    sadabs 
  
_exptl_special_details 
; 
 ? 
; 
  
_diffrn_ambient_temperature       296(2) 
_diffrn_radiation_wavelength      0.71073 
_diffrn_radiation_type            MoK\a 
_diffrn_source                    ? 
_diffrn_measurement_device_type   'Bruker APEX-II CCD' 
_diffrn_measurement_method        '\f and \w scans' 
_diffrn_detector_area_resol_mean  ? 
_diffrn_reflns_number             17269 
_diffrn_reflns_av_unetI/netI      0.0340 
_diffrn_reflns_av_R_equivalents   0.0345 
_diffrn_reflns_limit_h_min        -17 
_diffrn_reflns_limit_h_max        17 
_diffrn_reflns_limit_k_min        -12 
_diffrn_reflns_limit_k_max        12 
_diffrn_reflns_limit_l_min        -20 
_diffrn_reflns_limit_l_max        21 
_diffrn_reflns_theta_min          1.865 
_diffrn_reflns_theta_max          25.999 
_diffrn_reflns_theta_full         25.242 
_diffrn_measured_fraction_theta_max   1.000 
_diffrn_measured_fraction_theta_full  1.000 
_diffrn_reflns_Laue_measured_fraction_max    1.000 
_diffrn_reflns_Laue_measured_fraction_full   1.000 
_diffrn_reflns_point_group_measured_fraction_max   1.000 
_diffrn_reflns_point_group_measured_fraction_full  1.000 
_reflns_number_total              4772 
_reflns_number_gt                 3105 
_reflns_threshold_expression      'I > 2\s(I)' 
_reflns_Friedel_coverage          0.000 
_reflns_Friedel_fraction_max      . 
_reflns_Friedel_fraction_full     . 
  
_reflns_special_details 
; 
 Reflections were merged by SHELXL according to the crystal 
 class for the calculation of statistics and refinement. 
  
 _reflns_Friedel_fraction is defined as the number of unique 
 Friedel pairs measured divided by the number that would be 
 possible theoretically, ignoring centric projections and 
 systematic absences. 
; 
  
_computing_data_collection        'Bruker APEX2' 
_computing_cell_refinement        'Bruker SAINT' 
_computing_data_reduction         'Bruker SAINT' 
_computing_structure_solution     'SHELXS-97 (Sheldrick, 2008)' 
_computing_structure_refinement   'SHELXL-2013 (Sheldrick, 2013)' 
_computing_molecular_graphics     'Bruker SHELXTL' 
_computing_publication_material   'Bruker SHELXTL' 
  
_refine_special_details 
; 
 ? 
; 
_refine_ls_structure_factor_coef  Fsqd 
_refine_ls_matrix_type            full 
_refine_ls_weighting_scheme       calc 
_refine_ls_weighting_details 
'w=1/[\s^2^(Fo^2^)+(0.0342P)^2^+2.2855P] where P=(Fo^2^+2Fc^2^)/3' 
_atom_sites_solution_primary      ? 
_atom_sites_solution_secondary    ? 
_atom_sites_solution_hydrogens    geom 
_refine_ls_hydrogen_treatment     constr 
_refine_ls_extinction_method      SHELXL 
_refine_ls_extinction_coef        0.0005(2) 
_refine_ls_extinction_expression 
 'Fc^*^=kFc[1+0.001xFc^2^\l^3^/sin(2\q)]^-1/4^' 
_refine_ls_number_reflns          4772 
_refine_ls_number_parameters      292 
_refine_ls_number_restraints      0 
_refine_ls_R_factor_all           0.0798 
_refine_ls_R_factor_gt            0.0409 
_refine_ls_wR_factor_ref          0.1015 
_refine_ls_wR_factor_gt           0.0848 
_refine_ls_goodness_of_fit_ref    1.032 
_refine_ls_restrained_S_all       1.032 
_refine_ls_shift/su_max           0.023 
_refine_ls_shift/su_mean          0.000 
  
loop_ 
 _atom_site_label 
 _atom_site_type_symbol 
 _atom_site_fract_x 
 _atom_site_fract_y 
 _atom_site_fract_z 
 _atom_site_U_iso_or_equiv 
 _atom_site_adp_type 
 _atom_site_occupancy 
 _atom_site_site_symmetry_order 
 _atom_site_calc_flag 
 _atom_site_refinement_flags_posn 
 _atom_site_refinement_flags_adp 
 _atom_site_refinement_flags_occupancy 
 _atom_site_disorder_assembly 
 _atom_site_disorder_group 
Br1 Br -0.21435(4) -0.18928(7) 0.47382(4) 0.1237(3) Uani 1 1 d . . . . . 
Br2 Br 0.84621(3) 0.39118(4) 0.44264(3) 0.07137(17) Uani 1 1 d . . . . . 
O1 O 0.55514(17) -0.2008(2) 0.30570(13) 0.0545(6) Uani 1 1 d . . . . . 
O2 O 0.5359(2) -0.2616(3) 0.42996(16) 0.0719(8) Uani 1 1 d . . . . . 
O3 O 0.26314(17) -0.0494(2) 0.15665(13) 0.0532(6) Uani 1 1 d . . . . . 
O4 O 0.2094(2) 0.1532(3) 0.12922(15) 0.0682(8) Uani 1 1 d . . . . . 
C1 C 0.5039(2) -0.0845(3) 0.31160(18) 0.0437(8) Uani 1 1 d . . . . . 
C2 C 0.4423(2) -0.0410(3) 0.36243(18) 0.0439(8) Uani 1 1 d . . . . . 
H2 H 0.4260 -0.0820 0.4085 0.053 Uiso 1 1 calc R U . . . 
C3 C 0.4025(2) 0.0885(3) 0.33211(18) 0.0413(7) Uani 1 1 d . . . . . 
H3 H 0.3899 0.1493 0.3747 0.050 Uiso 1 1 calc R U . . . 
C4 C 0.4860(2) 0.1374(3) 0.28212(18) 0.0415(7) Uani 1 1 d . . . . . 
H4 H 0.4608 0.1994 0.2430 0.050 Uiso 1 1 calc R U . . . 
C5 C 0.5108(2) 0.0058(3) 0.24239(17) 0.0434(8) Uani 1 1 d . . . . . 
H5 H 0.5746 0.0053 0.2190 0.052 Uiso 1 1 calc R U . . . 
C6 C 0.4292(2) -0.0297(3) 0.18595(18) 0.0472(8) Uani 1 1 d . . . . . 
H6 H 0.4419 -0.0714 0.1393 0.057 Uiso 1 1 calc R U . . . 
C7 C 0.3400(2) -0.0002(3) 0.20418(18) 0.0452(8) Uani 1 1 d . . . . . 
C8 C 0.3113(2) 0.0704(3) 0.27806(19) 0.0452(8) Uani 1 1 d . . . . . 
H8 H 0.2877 0.1577 0.2632 0.054 Uiso 1 1 calc R U . . . 
C9 C 0.2302(2) -0.0003(3) 0.31641(19) 0.0484(8) Uani 1 1 d . . . . . 
H9 H 0.2414 -0.0854 0.3339 0.058 Uiso 1 1 calc R U . . . 
C10 C 0.1440(2) 0.0516(4) 0.3268(2) 0.0523(9) Uani 1 1 d . . . . . 
H10 H 0.1352 0.1369 0.3088 0.063 Uiso 1 1 calc R U . . . 
C11 C 0.0606(2) -0.0087(4) 0.3630(2) 0.0508(9) Uani 1 1 d . . . . . 
C12 C 0.0621(3) -0.1344(4) 0.3941(2) 0.0659(11) Uani 1 1 d . . . . . 
H12 H 0.1188 -0.1834 0.3928 0.079 Uiso 1 1 calc R U . . . 
C13 C -0.0189(3) -0.1879(5) 0.4268(2) 0.0746(12) Uani 1 1 d . . . . . 
H13 H -0.0167 -0.2722 0.4473 0.090 Uiso 1 1 calc R U . . . 
C14 C -0.1022(3) -0.1164(5) 0.4289(2) 0.0682(12) Uani 1 1 d . . . . . 
C15 C -0.1070(3) 0.0072(5) 0.3992(3) 0.0831(14) Uani 1 1 d . . . . . 
H15 H -0.1639 0.0555 0.4010 0.100 Uiso 1 1 calc R U . . . 
C16 C -0.0257(3) 0.0592(4) 0.3665(3) 0.0716(12) Uani 1 1 d . . . . . 
H16 H -0.0291 0.1433 0.3458 0.086 Uiso 1 1 calc R U . . . 
C17 C 0.2004(3) 0.0375(4) 0.12406(19) 0.0516(9) Uani 1 1 d . . . . . 
C18 C 0.1215(3) -0.0337(4) 0.0809(3) 0.0745(12) Uani 1 1 d . . . . . 
H18A H 0.0807 0.0283 0.0536 0.112 Uiso 1 1 calc R U . . . 
H18B H 0.0837 -0.0824 0.1169 0.112 Uiso 1 1 calc R U . . . 
H18C H 0.1492 -0.0928 0.0442 0.112 Uiso 1 1 calc R U . . . 
C19 C 0.5658(2) -0.2836(3) 0.3678(2) 0.0534(9) Uani 1 1 d . . . . . 
C20 C 0.6206(3) -0.4025(4) 0.3438(3) 0.0821(13) Uani 1 1 d . . . . . 
H20A H 0.6304 -0.4592 0.3878 0.123 Uiso 1 1 calc R U . . . 
H20B H 0.6823 -0.3766 0.3245 0.123 Uiso 1 1 calc R U . . . 
H20C H 0.5845 -0.4480 0.3037 0.123 Uiso 1 1 calc R U . . . 
C21 C 0.5730(2) 0.1964(3) 0.32427(18) 0.0418(7) Uani 1 1 d . . . . . 
C22 C 0.6468(3) 0.2493(3) 0.2804(2) 0.0524(9) Uani 1 1 d . . . . . 
H22 H 0.6408 0.2473 0.2264 0.063 Uiso 1 1 calc R U . . . 
C23 C 0.7284(3) 0.3043(4) 0.3147(2) 0.0557(9) Uani 1 1 d . . . . . 
H23 H 0.7768 0.3390 0.2843 0.067 Uiso 1 1 calc R U . . . 
C24 C 0.7373(2) 0.3073(3) 0.3945(2) 0.0475(8) Uani 1 1 d . . . . . 
C25 C 0.6668(2) 0.2554(3) 0.4399(2) 0.0502(8) Uani 1 1 d . . . . . 
H25 H 0.6737 0.2573 0.4938 0.060 Uiso 1 1 calc R U . . . 
C26 C 0.5851(2) 0.2001(3) 0.40461(19) 0.0481(8) Uani 1 1 d . . . . . 
H26 H 0.5373 0.1649 0.4354 0.058 Uiso 1 1 calc R U . . . 
  
loop_ 
 _atom_site_aniso_label 
 _atom_site_aniso_U_11 
 _atom_site_aniso_U_22 
 _atom_site_aniso_U_33 
 _atom_site_aniso_U_23 
 _atom_site_aniso_U_13 
 _atom_site_aniso_U_12 
Br1 0.0968(4) 0.1537(6) 0.1231(5) -0.0361(4) 0.0472(3) -0.0593(4) 
Br2 0.0547(2) 0.0823(3) 0.0768(3) 0.0013(2) -0.00432(18) -0.0114(2) 
O1 0.0651(15) 0.0454(14) 0.0532(14) 0.0041(12) 0.0065(12) 0.0197(12) 
O2 0.0821(19) 0.0731(19) 0.0613(18) 0.0213(15) 0.0132(15) 0.0220(16) 
O3 0.0580(14) 0.0471(13) 0.0538(14) -0.0058(12) -0.0077(11) 0.0044(12) 
O4 0.0877(19) 0.0472(16) 0.0683(18) 0.0024(13) -0.0242(15) 0.0007(14) 
C1 0.0474(18) 0.044(2) 0.0397(18) 0.0015(15) 0.0025(14) 0.0072(15) 
C2 0.0475(18) 0.048(2) 0.0361(18) 0.0055(15) 0.0038(14) 0.0003(16) 
C3 0.0446(17) 0.0428(19) 0.0367(17) -0.0045(15) 0.0047(13) 0.0057(15) 
C4 0.0482(18) 0.0392(18) 0.0372(17) 0.0022(14) 0.0025(14) 0.0067(15) 
C5 0.0446(17) 0.048(2) 0.0377(18) 0.0007(15) 0.0065(14) 0.0078(15) 
C6 0.056(2) 0.049(2) 0.0365(18) -0.0032(16) 0.0047(15) 0.0080(17) 
C7 0.054(2) 0.0414(19) 0.0401(18) -0.0010(15) -0.0027(15) 0.0054(16) 
C8 0.0467(18) 0.0417(19) 0.0472(19) 0.0007(15) 0.0023(15) 0.0089(15) 
C9 0.050(2) 0.047(2) 0.048(2) -0.0036(16) 0.0018(16) 0.0064(17) 
C10 0.055(2) 0.051(2) 0.051(2) -0.0011(17) 0.0061(17) 0.0086(18) 
C11 0.0481(19) 0.057(2) 0.047(2) -0.0093(18) 0.0022(16) 0.0030(18) 
C12 0.053(2) 0.078(3) 0.066(3) 0.012(2) -0.0014(19) 0.005(2) 
C13 0.068(3) 0.088(3) 0.068(3) 0.020(2) -0.004(2) -0.013(3) 
C14 0.058(2) 0.094(3) 0.053(2) -0.020(2) 0.0121(18) -0.023(2) 
C15 0.058(3) 0.078(3) 0.114(4) -0.030(3) 0.028(3) 0.003(2) 
C16 0.061(2) 0.058(2) 0.097(3) -0.004(2) 0.019(2) 0.009(2) 
C17 0.056(2) 0.055(2) 0.043(2) -0.0018(18) 0.0006(16) 0.0031(19) 
C18 0.066(2) 0.068(3) 0.089(3) -0.012(2) -0.017(2) -0.002(2) 
C19 0.048(2) 0.048(2) 0.064(3) 0.014(2) -0.0031(18) 0.0044(17) 
C20 0.100(3) 0.054(3) 0.093(3) 0.015(2) 0.010(3) 0.031(2) 
C21 0.0450(17) 0.0390(18) 0.0418(18) 0.0033(15) 0.0068(14) 0.0083(15) 
C22 0.060(2) 0.057(2) 0.0400(19) 0.0031(17) 0.0072(16) -0.0034(18) 
C23 0.052(2) 0.060(2) 0.055(2) 0.0041(19) 0.0138(17) -0.0036(18) 
C24 0.0456(18) 0.0407(19) 0.056(2) 0.0018(17) 0.0015(16) 0.0052(15) 
C25 0.058(2) 0.052(2) 0.0410(19) 0.0023(16) 0.0026(16) 0.0027(18) 
C26 0.0512(19) 0.050(2) 0.043(2) 0.0038(16) 0.0080(15) -0.0024(17) 
  
_geom_special_details 
; 
 All esds (except the esd in the dihedral angle between two l.s. planes) 
 are estimated using the full covariance matrix.  The cell esds are taken 
 into account individually in the estimation of esds in distances, angles 
 and torsion angles; correlations between esds in cell parameters are only 
 used when they are defined by crystal symmetry.  An approximate (isotropic) 
 treatment of cell esds is used for estimating esds involving l.s. planes. 
; 
  
loop_ 
 _geom_bond_atom_site_label_1 
 _geom_bond_atom_site_label_2 
 _geom_bond_distance 
 _geom_bond_site_symmetry_2 
 _geom_bond_publ_flag 
Br1 C14 1.902(4) . ? 
Br2 C24 1.900(3) . ? 
O1 C19 1.366(4) . ? 
O1 C1 1.387(4) . ? 
O2 C19 1.179(4) . ? 
O3 C17 1.351(4) . ? 
O3 C7 1.414(4) . ? 
O4 C17 1.191(4) . ? 
C1 C2 1.314(4) . ? 
C1 C5 1.510(4) . ? 
C2 C3 1.518(4) . ? 
C2 H2 0.9300 . ? 
C3 C4 1.541(4) . ? 
C3 C8 1.556(4) . ? 
C3 H3 0.9800 . ? 
C4 C21 1.511(4) . ? 
C4 C5 1.550(4) . ? 
C4 H4 0.9800 . ? 
C5 C6 1.510(4) . ? 
C5 H5 0.9800 . ? 
C6 C7 1.315(4) . ? 
C6 H6 0.9300 . ? 
C7 C8 1.523(5) . ? 
C8 C9 1.500(5) . ? 
C8 H8 0.9800 . ? 
C9 C10 1.321(4) . ? 
C9 H9 0.9300 . ? 
C10 C11 1.461(5) . ? 
C10 H10 0.9300 . ? 
C11 C16 1.382(5) . ? 
C11 C12 1.390(5) . ? 
C12 C13 1.379(5) . ? 
C12 H12 0.9300 . ? 
C13 C14 1.364(6) . ? 
C13 H13 0.9300 . ? 
C14 C15 1.361(6) . ? 
C15 C16 1.376(6) . ? 
C15 H15 0.9300 . ? 
C16 H16 0.9300 . ? 
C17 C18 1.491(5) . ? 
C18 H18A 0.9600 . ? 
C18 H18B 0.9600 . ? 
C18 H18C 0.9600 . ? 
C19 C20 1.495(5) . ? 
C20 H20A 0.9600 . ? 
C20 H20B 0.9600 . ? 
C20 H20C 0.9600 . ? 
C21 C26 1.388(4) . ? 
C21 C22 1.394(5) . ? 
C22 C23 1.378(5) . ? 
C22 H22 0.9300 . ? 
C23 C24 1.375(5) . ? 
C23 H23 0.9300 . ? 
C24 C25 1.371(5) . ? 
C25 C26 1.387(5) . ? 
C25 H25 0.9300 . ? 
C26 H26 0.9300 . ? 
  
loop_ 
 _geom_angle_atom_site_label_1 
 _geom_angle_atom_site_label_2 
 _geom_angle_atom_site_label_3 
 _geom_angle 
 _geom_angle_site_symmetry_1 
 _geom_angle_site_symmetry_3 
 _geom_angle_publ_flag 
C19 O1 C1 121.1(3) . . ? 
C17 O3 C7 118.0(3) . . ? 
C2 C1 O1 132.8(3) . . ? 
C2 C1 C5 112.0(3) . . ? 
O1 C1 C5 114.9(3) . . ? 
C1 C2 C3 107.5(3) . . ? 
C1 C2 H2 126.3 . . ? 
C3 C2 H2 126.3 . . ? 
C2 C3 C4 101.8(2) . . ? 
C2 C3 C8 112.4(3) . . ? 
C4 C3 C8 108.1(2) . . ? 
C2 C3 H3 111.4 . . ? 
C4 C3 H3 111.4 . . ? 
C8 C3 H3 111.4 . . ? 
C21 C4 C3 117.3(3) . . ? 
C21 C4 C5 112.0(3) . . ? 
C3 C4 C5 98.2(2) . . ? 
C21 C4 H4 109.6 . . ? 
C3 C4 H4 109.6 . . ? 
C5 C4 H4 109.6 . . ? 
C6 C5 C1 107.4(3) . . ? 
C6 C5 C4 108.7(3) . . ? 
C1 C5 C4 99.3(2) . . ? 
C6 C5 H5 113.5 . . ? 
C1 C5 H5 113.5 . . ? 
C4 C5 H5 113.5 . . ? 
C7 C6 C5 118.6(3) . . ? 
C7 C6 H6 120.7 . . ? 
C5 C6 H6 120.7 . . ? 
C6 C7 O3 118.3(3) . . ? 
C6 C7 C8 125.1(3) . . ? 
O3 C7 C8 116.2(3) . . ? 
C9 C8 C7 110.8(3) . . ? 
C9 C8 C3 113.3(3) . . ? 
C7 C8 C3 109.3(2) . . ? 
C9 C8 H8 107.8 . . ? 
C7 C8 H8 107.8 . . ? 
C3 C8 H8 107.8 . . ? 
C10 C9 C8 123.6(3) . . ? 
C10 C9 H9 118.2 . . ? 
C8 C9 H9 118.2 . . ? 
C9 C10 C11 127.9(3) . . ? 
C9 C10 H10 116.1 . . ? 
C11 C10 H10 116.1 . . ? 
C16 C11 C12 116.7(4) . . ? 
C16 C11 C10 119.9(3) . . ? 
C12 C11 C10 123.3(3) . . ? 
C13 C12 C11 121.3(4) . . ? 
C13 C12 H12 119.4 . . ? 
C11 C12 H12 119.4 . . ? 
C14 C13 C12 119.6(4) . . ? 
C14 C13 H13 120.2 . . ? 
C12 C13 H13 120.2 . . ? 
C13 C14 C15 121.2(4) . . ? 
C13 C14 Br1 119.9(4) . . ? 
C15 C14 Br1 118.9(3) . . ? 
C14 C15 C16 118.6(4) . . ? 
C14 C15 H15 120.7 . . ? 
C16 C15 H15 120.7 . . ? 
C15 C16 C11 122.6(4) . . ? 
C15 C16 H16 118.7 . . ? 
C11 C16 H16 118.7 . . ? 
O4 C17 O3 123.7(3) . . ? 
O4 C17 C18 126.4(4) . . ? 
O3 C17 C18 109.8(3) . . ? 
C17 C18 H18A 109.5 . . ? 
C17 C18 H18B 109.5 . . ? 
H18A C18 H18B 109.5 . . ? 
C17 C18 H18C 109.5 . . ? 
H18A C18 H18C 109.5 . . ? 
H18B C18 H18C 109.5 . . ? 
O2 C19 O1 123.9(3) . . ? 
O2 C19 C20 126.7(4) . . ? 
O1 C19 C20 109.3(3) . . ? 
C19 C20 H20A 109.5 . . ? 
C19 C20 H20B 109.5 . . ? 
H20A C20 H20B 109.5 . . ? 
C19 C20 H20C 109.5 . . ? 
H20A C20 H20C 109.5 . . ? 
H20B C20 H20C 109.5 . . ? 
C26 C21 C22 117.4(3) . . ? 
C26 C21 C4 124.1(3) . . ? 
C22 C21 C4 118.6(3) . . ? 
C23 C22 C21 121.9(3) . . ? 
C23 C22 H22 119.1 . . ? 
C21 C22 H22 119.1 . . ? 
C24 C23 C22 119.1(3) . . ? 
C24 C23 H23 120.5 . . ? 
C22 C23 H23 120.5 . . ? 
C25 C24 C23 121.0(3) . . ? 
C25 C24 Br2 119.5(3) . . ? 
C23 C24 Br2 119.5(3) . . ? 
C24 C25 C26 119.4(3) . . ? 
C24 C25 H25 120.3 . . ? 
C26 C25 H25 120.3 . . ? 
C21 C26 C25 121.4(3) . . ? 
C21 C26 H26 119.3 . . ? 
C25 C26 H26 119.3 . . ? 
  
loop_ 
 _geom_torsion_atom_site_label_1 
 _geom_torsion_atom_site_label_2 
 _geom_torsion_atom_site_label_3 
 _geom_torsion_atom_site_label_4 
 _geom_torsion 
 _geom_torsion_site_symmetry_1 
 _geom_torsion_site_symmetry_2 
 _geom_torsion_site_symmetry_3 
 _geom_torsion_site_symmetry_4 
 _geom_torsion_publ_flag 
C19 O1 C1 C2 -16.2(5) . . . . ? 
C19 O1 C1 C5 171.4(3) . . . . ? 
O1 C1 C2 C3 -173.9(3) . . . . ? 
C5 C1 C2 C3 -1.4(4) . . . . ? 
C1 C2 C3 C4 -27.0(3) . . . . ? 
C1 C2 C3 C8 88.4(3) . . . . ? 
C2 C3 C4 C21 -77.6(3) . . . . ? 
C8 C3 C4 C21 163.9(3) . . . . ? 
C2 C3 C4 C5 42.5(3) . . . . ? 
C8 C3 C4 C5 -76.1(3) . . . . ? 
C2 C1 C5 C6 -84.3(3) . . . . ? 
O1 C1 C5 C6 89.7(3) . . . . ? 
C2 C1 C5 C4 28.8(3) . . . . ? 
O1 C1 C5 C4 -157.2(3) . . . . ? 
C21 C4 C5 C6 -166.1(3) . . . . ? 
C3 C4 C5 C6 70.0(3) . . . . ? 
C21 C4 C5 C1 81.9(3) . . . . ? 
C3 C4 C5 C1 -42.0(3) . . . . ? 
C1 C5 C6 C7 71.1(4) . . . . ? 
C4 C5 C6 C7 -35.5(4) . . . . ? 
C5 C6 C7 O3 -171.3(3) . . . . ? 
C5 C6 C7 C8 1.3(5) . . . . ? 
C17 O3 C7 C6 -123.0(3) . . . . ? 
C17 O3 C7 C8 63.8(4) . . . . ? 
C6 C7 C8 C9 -131.5(4) . . . . ? 
O3 C7 C8 C9 41.2(4) . . . . ? 
C6 C7 C8 C3 -6.0(5) . . . . ? 
O3 C7 C8 C3 166.8(3) . . . . ? 
C2 C3 C8 C9 57.8(3) . . . . ? 
C4 C3 C8 C9 169.3(3) . . . . ? 
C2 C3 C8 C7 -66.3(3) . . . . ? 
C4 C3 C8 C7 45.2(3) . . . . ? 
C7 C8 C9 C10 -117.8(4) . . . . ? 
C3 C8 C9 C10 119.0(4) . . . . ? 
C8 C9 C10 C11 179.8(3) . . . . ? 
C9 C10 C11 C16 -177.7(4) . . . . ? 
C9 C10 C11 C12 1.2(6) . . . . ? 
C16 C11 C12 C13 -0.1(6) . . . . ? 
C10 C11 C12 C13 -179.1(4) . . . . ? 
C11 C12 C13 C14 0.0(6) . . . . ? 
C12 C13 C14 C15 0.0(6) . . . . ? 
C12 C13 C14 Br1 180.0(3) . . . . ? 
C13 C14 C15 C16 0.3(7) . . . . ? 
Br1 C14 C15 C16 -179.7(3) . . . . ? 
C14 C15 C16 C11 -0.5(7) . . . . ? 
C12 C11 C16 C15 0.4(6) . . . . ? 
C10 C11 C16 C15 179.4(4) . . . . ? 
C7 O3 C17 O4 4.7(5) . . . . ? 
C7 O3 C17 C18 -176.2(3) . . . . ? 
C1 O1 C19 O2 -2.4(5) . . . . ? 
C1 O1 C19 C20 177.9(3) . . . . ? 
C3 C4 C21 C26 4.9(5) . . . . ? 
C5 C4 C21 C26 -107.5(3) . . . . ? 
C3 C4 C21 C22 -175.8(3) . . . . ? 
C5 C4 C21 C22 71.7(4) . . . . ? 
C26 C21 C22 C23 -0.5(5) . . . . ? 
C4 C21 C22 C23 -179.8(3) . . . . ? 
C21 C22 C23 C24 0.0(5) . . . . ? 
C22 C23 C24 C25 0.6(5) . . . . ? 
C22 C23 C24 Br2 -176.7(3) . . . . ? 
C23 C24 C25 C26 -0.5(5) . . . . ? 
Br2 C24 C25 C26 176.8(3) . . . . ? 
C22 C21 C26 C25 0.6(5) . . . . ? 
C4 C21 C26 C25 179.8(3) . . . . ? 
C24 C25 C26 C21 -0.1(5) . . . . ? 
  
_refine_diff_density_max    0.719 
_refine_diff_density_min   -0.736 
_refine_diff_density_rms    0.049 
  
_shelxl_version_number 2013-4 
  
_shelx_res_file 
; 
TITL mo_dm17392_0m in P2(1)/n 
CELL 0.71073  13.8138  10.2034  17.2024  90.000  91.600  90.000 
ZERR    4.00   0.0014   0.0010   0.0018   0.000   0.002   0.000 
LATT 1 
SYMM 0.5-X, 0.5+Y, 0.5-Z 
SFAC C  H  O  Br 
UNIT 104 88 16 8 
OMIT  -3.00  52.00 
L.S. 10 
ACTA 
BOND  $H 
FMAP 2 
PLAN 20 
wpdb -1 
size 0.20 0.17 0.12 
mpla c21 > c26 
mpla c11 > c16 
htab 
conf 
TEMP 23 
WGHT    0.034200    2.285500 
EXTI    0.000476 
FVAR       0.10847 
MOLE 1 
BR1   4   -0.214353   -0.189279    0.473821    11.00000    0.09681    0.15368 = 
         0.12308   -0.03613    0.04718   -0.05928 
BR2   4    0.846207    0.391177    0.442635    11.00000    0.05469    0.08228 = 
         0.07678    0.00126   -0.00432   -0.01136 
O1    3    0.555137   -0.200792    0.305699    11.00000    0.06507    0.04539 = 
         0.05325    0.00411    0.00650    0.01975 
O2    3    0.535857   -0.261550    0.429956    11.00000    0.08206    0.07307 = 
         0.06131    0.02130    0.01318    0.02202 
O3    3    0.263139   -0.049427    0.156654    11.00000    0.05803    0.04714 = 
         0.05382   -0.00581   -0.00766    0.00437 
O4    3    0.209432    0.153239    0.129225    11.00000    0.08765    0.04719 = 
         0.06833    0.00238   -0.02416    0.00074 
C1    1    0.503888   -0.084514    0.311596    11.00000    0.04737    0.04420 = 
         0.03967    0.00152    0.00249    0.00716 
C2    1    0.442287   -0.040995    0.362426    11.00000    0.04752    0.04822 = 
         0.03606    0.00550    0.00377    0.00026 
AFIX  43 
H2    2    0.426049   -0.082041    0.408538    11.00000   -1.20000 
AFIX   0 
C3    1    0.402493    0.088490    0.332114    11.00000    0.04463    0.04282 = 
         0.03669   -0.00454    0.00472    0.00568 
AFIX  13 
H3    2    0.389856    0.149298    0.374746    11.00000   -1.20000 
AFIX   0 
C4    1    0.485994    0.137399    0.282116    11.00000    0.04824    0.03922 = 
         0.03721    0.00221    0.00245    0.00666 
AFIX  13 
H4    2    0.460796    0.199357    0.243005    11.00000   -1.20000 
AFIX   0 
C5    1    0.510782    0.005753    0.242393    11.00000    0.04456    0.04825 = 
         0.03773    0.00068    0.00654    0.00781 
AFIX  13 
H5    2    0.574643    0.005262    0.218974    11.00000   -1.20000 
AFIX   0 
C6    1    0.429247   -0.029657    0.185948    11.00000    0.05631    0.04906 = 
         0.03652   -0.00324    0.00470    0.00802 
AFIX  43 
H6    2    0.441873   -0.071443    0.139266    11.00000   -1.20000 
AFIX   0 
C7    1    0.340005   -0.000172    0.204180    11.00000    0.05376    0.04141 = 
         0.04007   -0.00103   -0.00270    0.00542 
C8    1    0.311310    0.070370    0.278059    11.00000    0.04674    0.04168 = 
         0.04717    0.00070    0.00225    0.00889 
AFIX  13 
H8    2    0.287749    0.157705    0.263235    11.00000   -1.20000 
AFIX   0 
C9    1    0.230249   -0.000300    0.316410    11.00000    0.04983    0.04737 = 
         0.04802   -0.00365    0.00185    0.00639 
AFIX  43 
H9    2    0.241360   -0.085391    0.333861    11.00000   -1.20000 
AFIX   0 
C10   1    0.143967    0.051613    0.326770    11.00000    0.05478    0.05110 = 
         0.05140   -0.00111    0.00607    0.00861 
AFIX  43 
H10   2    0.135235    0.136878    0.308801    11.00000   -1.20000 
AFIX   0 
C11   1    0.060613   -0.008676    0.363028    11.00000    0.04812    0.05725 = 
         0.04694   -0.00935    0.00217    0.00300 
C12   1    0.062108   -0.134418    0.394102    11.00000    0.05289    0.07821 = 
         0.06644    0.01210   -0.00141    0.00512 
AFIX  43 
H12   2    0.118816   -0.183402    0.392812    11.00000   -1.20000 
AFIX   0 
C13   1   -0.018883   -0.187941    0.426811    11.00000    0.06822    0.08769 = 
         0.06768    0.02020   -0.00375   -0.01278 
AFIX  43 
H13   2   -0.016718   -0.272247    0.447334    11.00000   -1.20000 
AFIX   0 
C14   1   -0.102211   -0.116385    0.428862    11.00000    0.05756    0.09442 = 
         0.05312   -0.02022    0.01208   -0.02285 
C15   1   -0.106953    0.007173    0.399201    11.00000    0.05843    0.07817 = 
         0.11415   -0.02980    0.02788    0.00338 
AFIX  43 
H15   2   -0.163938    0.055473    0.401020    11.00000   -1.20000 
AFIX   0 
C16   1   -0.025734    0.059165    0.366471    11.00000    0.06084    0.05759 = 
         0.09738   -0.00376    0.01898    0.00918 
AFIX  43 
H16   2   -0.029075    0.143342    0.345837    11.00000   -1.20000 
AFIX   0 
C17   1    0.200401    0.037457    0.124062    11.00000    0.05642    0.05523 = 
         0.04314   -0.00176    0.00058    0.00308 
C18   1    0.121466   -0.033687    0.080854    11.00000    0.06557    0.06758 = 
         0.08940   -0.01173   -0.01710   -0.00156 
AFIX 137 
H18A  2    0.080694    0.028291    0.053638    11.00000   -1.50000 
H18B  2    0.083664   -0.082352    0.116889    11.00000   -1.50000 
H18C  2    0.149218   -0.092807    0.044214    11.00000   -1.50000 
AFIX   0 
C19   1    0.565778   -0.283574    0.367752    11.00000    0.04811    0.04767 = 
         0.06410    0.01382   -0.00309    0.00444 
C20   1    0.620649   -0.402483    0.343810    11.00000    0.10004    0.05412 = 
         0.09265    0.01539    0.00952    0.03112 
AFIX 137 
H20A  2    0.630391   -0.459246    0.387843    11.00000   -1.50000 
H20B  2    0.682300   -0.376553    0.324486    11.00000   -1.50000 
H20C  2    0.584503   -0.448032    0.303724    11.00000   -1.50000 
AFIX   0 
C21   1    0.573019    0.196383    0.324274    11.00000    0.04498    0.03900 = 
         0.04178    0.00327    0.00678    0.00827 
C22   1    0.646795    0.249253    0.280385    11.00000    0.06008    0.05744 = 
         0.04002    0.00313    0.00720   -0.00338 
AFIX  43 
H22   2    0.640760    0.247297    0.226417    11.00000   -1.20000 
AFIX   0 
C23   1    0.728433    0.304346    0.314710    11.00000    0.05238    0.06044 = 
         0.05499    0.00410    0.01381   -0.00361 
AFIX  43 
H23   2    0.776837    0.339044    0.284339    11.00000   -1.20000 
AFIX   0 
C24   1    0.737297    0.307279    0.394520    11.00000    0.04556    0.04069 = 
         0.05622    0.00185    0.00146    0.00525 
C25   1    0.666779    0.255393    0.439890    11.00000    0.05783    0.05200 = 
         0.04095    0.00229    0.00262    0.00273 
AFIX  43 
H25   2    0.673712    0.257253    0.493809    11.00000   -1.20000 
AFIX   0 
C26   1    0.585050    0.200137    0.404614    11.00000    0.05117    0.05020 = 
         0.04326    0.00379    0.00801   -0.00238 
AFIX  43 
H26   2    0.537308    0.164861    0.435423    11.00000   -1.20000 
AFIX   0 
HKLF 4 
  
REM  mo_dm17392_0m in P2(1)/n 
REM R1 =  0.0409 for    3105 Fo > 4sig(Fo)  and  0.0798 for all    4772 data 
REM    292 parameters refined using      0 restraints 
  
END 
  
WGHT      0.0264      2.5255 
  
REM Instructions for potential hydrogen bonds 
HTAB C8 O4 
EQIV $1 x+1/2, -y+1/2, z+1/2 
HTAB C25 O4_$1 
  
REM Highest difference peak  0.719,  deepest hole -0.736,  1-sigma level  0.049 
Q1    1  -0.1669 -0.2337  0.5034  11.00000  0.05    0.72 
Q2    1  -0.2210 -0.1152  0.4753  11.00000  0.05    0.57 
Q3    1  -0.2173 -0.2063  0.4328  11.00000  0.05    0.44 
Q4    1   0.8138  0.3936  0.4886  11.00000  0.05    0.32 
Q5    1   0.6580 -0.4033  0.2901  11.00000  0.05    0.23 
Q6    1  -0.2730 -0.1605  0.4986  11.00000  0.05    0.21 
Q7    1   0.8184  0.4823  0.4294  11.00000  0.05    0.20 
Q8    1   0.5670 -0.4842  0.3580  11.00000  0.05    0.18 
Q9    1  -0.0994 -0.0438  0.4426  11.00000  0.05    0.17 
Q10   1   0.8597  0.4756  0.3766  11.00000  0.05    0.17 
Q11   1   0.6996 -0.3995  0.3898  11.00000  0.05    0.17 
Q12   1   0.2274 -0.1576  0.1807  11.00000  0.05    0.17 
Q13   1   0.3524  0.0774  0.3070  11.00000  0.05    0.17 
Q14   1   0.1061  0.1553  0.2603  11.00000  0.05    0.17 
Q15   1   0.3968 -0.1055  0.4044  11.00000  0.05    0.17 
Q16   1   0.3841 -0.0639  0.2137  11.00000  0.05    0.16 
Q17   1   0.5010  0.0843  0.2520  11.00000  0.05    0.16 
Q18   1   0.2158 -0.0504  0.1919  11.00000  0.05    0.16 
Q19   1   0.1207 -0.1176  0.0786  11.00000  0.05    0.16 
Q20   1   0.6979  0.3195  0.4189  11.00000  0.05    0.15 
; 
_shelx_res_checksum   74861 
  
_shelx_hkl_file 
; 
   1   0   0   -0.07    0.01 
  -1   0   0   -0.07    0.01 
  -1   0   0   -0.05    0.02 
  -2   0   0   46.53    0.96 
  -2   0   0   46.26    1.04 
   2   0   0   46.80    0.89 
   3   0   0    0.08    0.05 
  -3   0   0    0.06    0.08 
  -3   0   0    0.02    0.05 
  -4   0   0    3.78    0.16 
  -4   0   0    3.70    0.19 
   4   0   0    3.49    0.16 
   5   0   0    0.04    0.09 
  -5   0   0    0.08    0.10 
  -5   0   0    0.10    0.13 
  -6   0   0    3.18    0.21 
   6   0   0    3.21    0.20 
  -6   0   0    3.34    0.27 
   7   0   0   -0.19    0.13 
  -7   0   0    0.02    0.14 
  -7   0   0    0.36    0.19 
  -8   0   0    0.66    0.17 
  -8   0   0    0.93    0.24 
   8   0   0    0.72    0.17 
  -9   0   0    0.09    0.26 
  -9   0   0    0.14    0.19 
   9   0   0    0.04    0.18 
  10   0   0   16.67    0.49 
 -10   0   0   16.71    0.53 
 -10   0   0   16.17    0.62 
 -11   0   0    0.75    0.34 
  11   0   0    0.21    0.24 
 -11   0   0   -0.04    0.25 
 -12   0   0    2.10    0.30 
  12   0   0    1.82    0.29 
 -12   0   0    2.47    0.41 
 -13   0   0    0.32    0.31 
 -13   0   0    0.20    0.41 
  13   0   0    0.09    0.31 
 -14   0   0   13.13    0.72 
  14   0   0   12.01    0.60 
 -15   0   0    0.50    0.50 
  15   0   0   -0.24    0.35 
 -16   0   0    2.83    0.55 
  16   0   0    2.92    0.41 
 -17   0   0    1.00    0.57 
  17   0   0   -0.26    0.44 
   0  -1   0    0.01    0.03 
   0  -1   0    0.04    0.03 
   0  -1   0    0.00    0.03 
  -1  -1   0   19.97    0.44 
   1  -1   0   19.61    0.40 
   1  -1   0   20.50    0.46 
  -1  -1   0   20.75    0.46 
   1   1   0   19.98    0.39 
  -2  -1   0    0.02    0.08 
   2  -1   0    0.10    0.05 
  -2  -1   0    0.12    0.06 
   2   1   0    0.08    0.03 
  -3  -1   0    2.27    0.14 
   3  -1   0    2.14    0.13 
  -3  -1   0    2.25    0.15 
   3   1   0    2.18    0.10 
  -4  -1   0  146.72    3.28 
   4  -1   0  146.59    2.79 
  -4  -1   0  147.12    3.05 
   4   1   0  147.68    2.78 
   5  -1   0    1.67    0.13 
  -5  -1   0    1.97    0.13 
  -5  -1   0    2.32    0.19 
   5   1   0    1.90    0.11 
  -5   1   0    1.95    0.16 
   6  -1   0   67.07    1.33 
  -6  -1   0   67.20    1.43 
  -6  -1   0   66.60    1.56 
  -6   1   0   66.31    1.41 
   6   1   0   67.94    1.31 
  -7  -1   0   68.47    1.62 
  -7  -1   0   68.67    1.48 
   7  -1   0   70.04    1.37 
  -7   1   0   67.57    1.59 
  -7   1   0   67.86    1.45 
   7   1   0   69.13    1.35 
  -8  -1   0  143.07    3.28 
  -8  -1   0  143.13    3.03 
   8  -1   0  145.80    2.79 
  -8   1   0  144.62    3.01 
   8   1   0  146.29    2.77 
  -8   1   0  144.37    3.26 
   9  -1   0   51.99    1.09 
  -9  -1   0   51.50    1.30 
  -9  -1   0   51.84    1.17 
  -9   1   0   50.59    1.13 
   9   1   0   52.62    1.07 
  -9   1   0   50.82    1.28 
 -10  -1   0   10.06    0.55 
  10  -1   0    9.58    0.43 
 -10  -1   0    9.63    0.45 
 -10   1   0    9.88    0.41 
 -10   1   0   10.38    0.55 
  10   1   0   10.27    0.41 
 -11  -1   0    5.22    0.44 
 -11  -1   0    6.37    0.48 
  11  -1   0    5.25    0.33 
 -11   1   0    5.80    0.38 
 -11   1   0    5.18    0.41 
  11   1   0    5.57    0.41 
 -12  -1   0   -0.01    0.39 
  12  -1   0    0.12    0.28 
 -12  -1   0    0.66    0.32 
  12   1   0    0.00    0.25 
 -12   1   0    0.04    0.37 
 -12   1   0   -0.24    0.26 
  13  -1   0   10.65    0.57 
 -13  -1   0   10.53    0.55 
 -13  -1   0   11.29    0.72 
  13   1   0   10.06    0.53 
 -13   1   0    9.51    0.64 
 -14  -1   0   -0.14    0.46 
  14  -1   0    0.32    0.34 
 -14   1   0    0.88    0.47 
  14   1   0    0.20    0.32 
  15  -1   0    0.14    0.39 
 -15  -1   0    0.66    0.51 
  15   1   0    0.07    0.36 
 -15   1   0    0.36    0.51 
  16  -1   0    0.39    0.40 
 -16  -1   0    0.14    0.52 
 -16   1   0    0.60    0.55 
 -17  -1   0    1.29    0.57 
  17  -1   0    0.40    0.44 
 -17   1   0    0.48    0.58 
   0  -2   0    0.69    0.08 
   0  -2   0    0.60    0.06 
   0  -2   0    0.89    0.08 
   1  -2   0  504.20    9.64 
  -1  -2   0  524.39   11.24 
   1  -2   0  526.24   11.24 
   1  -2   0  475.17   10.51 
  -1  -2   0  520.25   10.54 
   1   2   0  512.81    9.96 
  -2  -2   0   17.46    0.42 
   2  -2   0   17.16    0.37 
   2  -2   0   17.58    0.42 
  -2  -2   0   17.08    0.42 
   2   2   0   16.99    0.34 
  -3  -2   0  108.67    2.28 
   3  -2   0  109.03    2.09 
  -3  -2   0  111.57    2.44 
   3   2   0  107.64    2.06 
  -4  -2   0   48.96    1.09 
  -4  -2   0   50.71    1.18 
   4  -2   0   50.61    1.00 
   4   2   0   49.63    0.96 
  -5  -2   0   63.26    1.35 
   5  -2   0   63.42    1.25 
  -5  -2   0   60.01    1.48 
   5   2   0   64.43    1.21 
  -6  -2   0    2.31    0.26 
  -6  -2   0    2.38    0.18 
   6  -2   0    2.17    0.17 
   6   2   0    2.12    0.12 
  -7  -2   0    8.04    0.36 
   7  -2   0    8.81    0.32 
  -7  -2   0    8.95    0.45 
   7   2   0    8.75    0.28 
  -7   2   0    9.09    0.30 
  -8  -2   0   12.83    0.55 
   8  -2   0   13.31    0.44 
  -8  -2   0   12.20    0.44 
  -8   2   0   12.86    0.38 
   8   2   0   12.74    0.38 
   9  -2   0    9.21    0.38 
  -9  -2   0    9.37    0.54 
  -9  -2   0    9.34    0.46 
  -9   2   0    9.50    0.49 
  -9   2   0    9.36    0.35 
   9   2   0    9.80    0.36 
  10  -2   0    1.44    0.26 
 -10  -2   0    1.61    0.39 
 -10  -2   0    1.24    0.27 
 -10   2   0    1.60    0.31 
 -10   2   0    1.54    0.20 
  10   2   0    1.04    0.20 
 -11  -2   0    0.99    0.39 
 -11  -2   0    0.67    0.30 
  11  -2   0    0.30    0.28 
  11   2   0    0.79    0.22 
 -11   2   0    0.88    0.36 
 -11   2   0    0.72    0.22 
 -12  -2   0    3.37    0.46 
 -12  -2   0    3.25    0.36 
  12  -2   0    2.99    0.33 
 -12   2   0    3.17    0.43 
  12   2   0    3.19    0.28 
 -13  -2   0   -0.02    0.44 
 -13  -2   0   -0.32    0.35 
  13  -2   0    0.39    0.35 
  13   2   0   -0.21    0.29 
 -13   2   0   -0.01    0.42 
  14  -2   0    0.22    0.39 
 -14  -2   0    1.78    0.52 
 -14  -2   0    0.58    0.42 
  14   2   0    0.78    0.31 
 -14   2   0    0.72    0.46 
 -15  -2   0    8.30    0.65 
  15  -2   0    8.10    0.58 
 -15   2   0    7.73    0.62 
 -16  -2   0    0.98    0.54 
  16  -2   0    0.04    0.42 
 -16   2   0    0.58    0.54 
 -17  -2   0    2.77    0.62 
  17  -2   0    1.10    0.49 
 -17   2   0    2.48    0.61 
   0  -3   0    0.05    0.08 
   0  -3   0    0.04    0.10 
   0  -3   0   -0.01    0.11 
  -1  -3   0    3.74    0.21 
   1  -3   0    3.27    0.18 
  -1  -3   0    3.64    0.18 
   1  -3   0    3.28    0.19 
  -1  -3   0    3.55    0.14 
   1  -3   0    3.38    0.17 
  -2  -3   0  259.82    5.70 
   2  -3   0  256.39    4.89 
   2  -3   0  254.60    5.33 
   2  -3   0  261.65    5.69 
   2   3   0  259.07    4.87 
   3  -3   0    0.42    0.12 
   3  -3   0    0.46    0.15 
  -3  -3   0    0.34    0.14 
  -3  -3   0    0.53    0.14 
   3   3   0    0.46    0.06 
   4  -3   0  156.68    3.00 
  -4  -3   0  161.36    3.50 
  -4  -3   0  151.44    3.27 
   4   3   0  156.87    2.95 
  -5  -3   0  101.15    2.20 
  -5  -3   0  107.77    2.36 
   5  -3   0  102.54    2.01 
   5   3   0  102.46    1.96 
  -6  -3   0   11.51    0.42 
  -6  -3   0   10.87    0.51 
   6  -3   0   11.85    0.40 
   6   3   0   11.72    0.29 
  -7  -3   0   60.04    1.34 
   7  -3   0   59.83    1.24 
  -7  -3   0   57.66    1.48 
   7   3   0   60.67    1.16 
   8  -3   0   18.27    0.54 
  -8  -3   0   16.24    0.66 
  -8  -3   0   18.11    0.56 
   8   3   0   18.40    0.44 
  -9  -3   0   24.90    0.85 
  -9  -3   0   23.97    0.70 
   9  -3   0   23.95    0.66 
  -9   3   0   24.19    0.60 
   9   3   0   25.44    0.57 
 -10  -3   0    1.22    0.39 
  10  -3   0    0.76    0.27 
 -10  -3   0    0.24    0.31 
  10   3   0    0.72    0.19 
 -10   3   0    0.88    0.19 
 -11  -3   0    2.09    0.43 
  11  -3   0    1.16    0.28 
 -11  -3   0    1.12    0.34 
 -11   3   0    1.83    0.39 
  11   3   0    1.28    0.22 
  12  -3   0    0.28    0.29 
 -12  -3   0    0.35    0.43 
 -12  -3   0    0.17    0.36 
  12   3   0    0.25    0.24 
 -12   3   0    0.94    0.43 
 -13  -3   0    0.29    0.46 
 -13  -3   0    0.21    0.39 
  13  -3   0   -0.02    0.35 
 -13   3   0    0.02    0.45 
 -14  -3   0    6.06    0.61 
  14  -3   0    4.82    0.44 
 -14  -3   0    4.39    0.47 
 -14   3   0    5.62    0.58 
  15  -3   0    0.44    0.42 
 -15  -3   0   -0.09    0.45 
 -15  -3   0    0.25    0.53 
 -15   3   0    0.86    0.53 
  16  -3   0    0.40    0.45 
 -16  -3   0    1.70    0.60 
 -16   3   0    0.17    0.55 
  17  -3   0    0.50    0.51 
 -17  -3   0    1.22    0.62 
 -17   3   0    1.11    0.61 
   0  -4   0    3.80    0.22 
   0  -4   0    3.68    0.21 
   0  -4   0    3.86    0.25 
  -1  -4   0   80.51    1.53 
   1  -4   0   79.77    1.80 
  -1  -4   0   79.50    1.70 
  -1  -4   0   79.50    1.79 
   1  -4   0   79.06    1.55 
   1  -4   0   77.47    1.70 
   2  -4   0   14.50    0.38 
  -2  -4   0   14.03    0.40 
  -2  -4   0   14.36    0.43 
   2  -4   0   13.86    0.42 
   2  -4   0   13.90    0.41 
   2   4   0   13.94    0.33 
  -3  -4   0   73.35    1.61 
   3  -4   0   74.50    1.47 
   3  -4   0   74.36    1.69 
  -3  -4   0   74.24    1.69 
   3   4   0   74.08    1.42 
   4  -4   0   18.32    0.48 
  -4  -4   0   17.96    0.51 
  -4  -4   0   17.79    0.52 
   4   4   0   17.62    0.38 
  -5  -4   0  120.20    2.65 
  -5  -4   0  117.01    2.49 
   5  -4   0  114.69    2.28 
   5   4   0  115.76    2.22 
   6  -4   0   12.57    0.41 
  -6  -4   0   13.42    0.52 
  -6  -4   0   13.22    0.50 
   6   4   0   13.29    0.31 
   7  -4   0    5.46    0.34 
  -7  -4   0    5.67    0.38 
  -7  -4   0    6.09    0.42 
   7   4   0    5.67    0.23 
  -8  -4   0   12.85    0.63 
   8  -4   0   13.72    0.47 
  -8  -4   0   14.05    0.55 
   8   4   0   14.02    0.36 
  -9  -4   0    0.74    0.30 
  -9  -4   0    0.09    0.39 
   9  -4   0    0.16    0.27 
   9   4   0    0.74    0.16 
 -10  -4   0    4.27    0.37 
  10  -4   0    3.44    0.33 
 -10  -4   0    3.92    0.50 
  10   4   0    4.56    0.31 
  11  -4   0    8.10    0.53 
 -11  -4   0    6.26    0.44 
 -11  -4   0    7.64    0.59 
 -12  -4   0    2.70    0.54 
  12  -4   0    2.25    0.37 
 -12  -4   0    2.98    0.42 
 -12   4   0    2.80    0.46 
 -13  -4   0    3.78    0.60 
 -13  -4   0    2.41    0.45 
  13  -4   0    2.82    0.41 
 -13   4   0    2.49    0.52 
  14  -4   0    0.54    0.42 
 -14  -4   0    1.10    0.47 
 -14  -4   0    1.73    0.59 
 -14   4   0    0.81    0.53 
 -15  -4   0    0.72    0.57 
  15  -4   0    0.24    0.44 
 -15  -4   0    0.35    0.49 
 -15   4   0    0.76    0.59 
 -16  -4   0    2.18    0.53 
  16  -4   0    1.30    0.49 
 -16  -4   0    2.88    0.62 
 -16   4   0    1.64    0.59 
  17  -4   0   -0.40    0.50 
 -17  -4   0    1.45    0.66 
 -17   4   0   -0.29    0.60 
   0  -5   0    0.02    0.15 
   0  -5   0    0.19    0.20 
   0  -5   0    0.26    0.17 
   1  -5   0   17.66    0.51 
  -1  -5   0   17.93    0.50 
   1  -5   0   18.27    0.51 
  -1  -5   0   18.43    0.44 
   1  -5   0   17.85    0.47 
  -1  -5   0   18.73    0.53 
  -2  -5   0    8.99    0.39 
   2  -5   0    8.34    0.35 
   2  -5   0    8.71    0.34 
  -2  -5   0    8.00    0.33 
   2  -5   0    8.78    0.37 
   2   5   0    8.84    0.27 
  -3  -5   0  103.99    2.24 
   3  -5   0  104.05    2.04 
   3  -5   0  105.09    2.21 
   3  -5   0  101.98    2.35 
  -3  -5   0  103.48    2.35 
   3   5   0  103.79    1.98 
  -4  -5   0    3.60    0.29 
   4  -5   0    3.84    0.28 
   4  -5   0    3.32    0.23 
  -4  -5   0    3.43    0.28 
   4   5   0    3.58    0.19 
  -5  -5   0   57.41    1.32 
   5  -5   0   56.65    1.21 
  -5  -5   0   56.86    1.37 
   5   5   0   58.56    1.11 
  -6  -5   0    7.36    0.43 
  -6  -5   0    8.11    0.39 
   6  -5   0    7.87    0.38 
   6   5   0    7.65    0.24 
  -7  -5   0    0.52    0.30 
  -7  -5   0    0.25    0.30 
   7  -5   0    0.52    0.25 
   7   5   0    0.65    0.12 
   8  -5   0   10.65    0.45 
  -8  -5   0   10.93    0.52 
  -8  -5   0    9.90    0.56 
   8   5   0   10.58    0.31 
  -9  -5   0    2.12    0.46 
  -9  -5   0    2.04    0.35 
   9  -5   0    2.24    0.32 
  10  -5   0    4.13    0.37 
 -10  -5   0    3.68    0.40 
 -10  -5   0    4.33    0.53 
 -11  -5   0    2.41    0.55 
 -11  -5   0    3.29    0.42 
  11  -5   0    2.89    0.38 
 -12  -5   0    0.55    0.56 
 -12  -5   0    2.43    0.43 
  12  -5   0    1.78    0.40 
 -13  -5   0    3.04    0.49 
 -13  -5   0    3.43    0.64 
  13  -5   0    3.32    0.40 
 -13   5   0    3.74    0.55 
 -14  -5   0    0.27    0.49 
 -14  -5   0    1.19    0.63 
  14  -5   0   -0.21    0.42 
 -14   5   0    0.06    0.56 
 -15  -5   0    1.38    0.54 
  15  -5   0    0.36    0.42 
 -15  -5   0    1.55    0.66 
 -15   5   0    0.82    0.61 
 -16  -5   0    1.59    0.64 
 -16  -5   0    0.62    0.57 
  16  -5   0    1.20    0.51 
 -16   5   0    0.68    0.67 
   0  -6   0    0.37    0.24 
   0  -6   0   -0.06    0.21 
   0  -6   0    0.25    0.18 
  -1  -6   0    4.74    0.38 
   1  -6   0    4.00    0.24 
  -1  -6   0    3.93    0.31 
   1  -6   0    3.94    0.33 
   1  -6   0    3.98    0.29 
  -1  -6   0    4.67    0.28 
   1   6   0    4.29    0.21 
   2  -6   0    2.71    0.28 
  -2  -6   0    2.58    0.29 
   2  -6   0    2.54    0.23 
  -2  -6   0    3.18    0.26 
   2  -6   0    2.70    0.26 
   2   6   0    2.46    0.17 
   3  -6   0   42.47    1.07 
  -3  -6   0   43.34    1.06 
   3  -6   0   43.75    0.97 
  -3  -6   0   45.11    1.06 
   3  -6   0   43.64    1.01 
   3   6   0   42.56    0.88 
   4  -6   0   42.12    0.93 
   4  -6   0   39.46    1.01 
  -4  -6   0   39.15    1.00 
  -4  -6   0   39.77    1.01 
   4   6   0   40.07    0.81 
   5  -6   0    2.83    0.28 
  -5  -6   0    3.19    0.30 
  -5  -6   0    2.91    0.31 
   5   6   0    3.22    0.21 
   6  -6   0   37.05    0.90 
  -6  -6   0   36.02    0.97 
  -6  -6   0   36.21    0.96 
   6   6   0   36.79    0.73 
  -7  -6   0    0.51    0.34 
   7  -6   0    0.57    0.26 
  -7  -6   0    0.52    0.33 
  -8  -6   0   -0.32    0.37 
   8  -6   0    0.23    0.30 
  -8  -6   0   -0.13    0.34 
  -9  -6   0    7.39    0.54 
  -9  -6   0    6.95    0.55 
   9  -6   0    6.79    0.42 
 -10  -6   0    1.28    0.50 
  10  -6   0    1.36    0.36 
 -10  -6   0    1.82    0.41 
  11  -6   0    9.06    0.55 
 -11  -6   0    8.93    0.62 
 -11  -6   0    9.69    0.69 
 -12  -6   0    1.92    0.46 
  12  -6   0    1.99    0.42 
 -12  -6   0    0.97    0.60 
 -13  -6   0    1.07    0.48 
 -13  -6   0    0.99    0.63 
  13  -6   0    1.11    0.44 
 -14  -6   0    0.68    0.52 
  14  -6   0    1.27    0.48 
 -14  -6   0   -0.11    0.59 
 -14   6   0    0.82    0.60 
 -15  -6   0    0.71    0.67 
 -15  -6   0    0.79    0.58 
  15  -6   0    1.02    0.52 
 -15   6   0    0.74    0.65 
  16  -6   0    0.40    0.54 
 -16  -6   0    0.24    0.68 
 -16  -6   0    0.12    0.57 
   0  -7   0   -0.23    0.25 
   0  -7   0   -0.30    0.28 
   0  -7   0   -0.01    0.22 
   1  -7   0   -0.11    0.28 
   1  -7   0   -0.46    0.22 
  -1  -7   0    0.16    0.27 
   1  -7   0   -0.64    0.27 
  -1  -7   0    0.27    0.21 
  -1  -7   0   -0.26    0.30 
   1   7   0   -0.06    0.19 
  -2  -7   0   38.38    0.99 
   2  -7   0   38.03    0.97 
  -2  -7   0   38.56    0.97 
   2  -7   0   37.83    0.89 
   2  -7   0   36.97    0.95 
   2   7   0   38.53    0.82 
   3  -7   0    0.10    0.30 
  -3  -7   0   -0.16    0.26 
  -3  -7   0    0.08    0.32 
   3  -7   0    0.40    0.27 
   3  -7   0    0.10    0.29 
   3   7   0    0.29    0.16 
  -4  -7   0    6.65    0.37 
  -4  -7   0    7.34    0.51 
   4  -7   0    6.90    0.43 
   4  -7   0    7.10    0.48 
   4   7   0    7.38    0.30 
  -5  -7   0    5.27    0.40 
   5  -7   0    6.22    0.37 
  -5  -7   0    5.72    0.46 
   5   7   0    6.25    0.27 
  -6  -7   0    4.74    0.44 
  -6  -7   0    5.14    0.42 
   6  -7   0    5.24    0.37 
   7  -7   0    6.95    0.50 
  -7  -7   0    8.57    0.59 
  -7  -7   0    7.29    0.48 
  -8  -7   0    0.01    0.40 
   8  -7   0   -0.08    0.34 
  -8  -7   0   -0.35    0.38 
   9  -7   0    0.27    0.33 
  -9  -7   0    0.52    0.42 
  -9  -7   0    0.02    0.44 
 -10  -7   0    1.15    0.52 
 -10  -7   0    0.64    0.45 
  10  -7   0    1.49    0.40 
 -11  -7   0   -0.50    0.47 
  11  -7   0   -0.02    0.41 
 -11  -7   0   -0.24    0.54 
  12  -7   0    5.40    0.51 
 -12  -7   0    5.92    0.56 
 -12  -7   0    4.90    0.69 
  13  -7   0    0.15    0.48 
 -13  -7   0   -0.84    0.65 
 -13  -7   0   -0.23    0.52 
 -14  -7   0    1.58    0.72 
 -14  -7   0    2.98    0.62 
  14  -7   0    1.75    0.53 
  15  -7   0    0.22    0.53 
 -15  -7   0    0.61    0.62 
 -15   7   0   -0.40    0.68 
   0  -8   0   -0.05    0.35 
   0  -8   0    0.19    0.31 
   0  -8   0    0.37    0.27 
  -1  -8   0    6.40    0.43 
   1  -8   0    5.94    0.36 
   1  -8   0    6.13    0.42 
   1  -8   0    5.77    0.40 
  -1  -8   0    5.91    0.45 
   1   8   0    6.46    0.30 
   2  -8   0    1.53    0.35 
   2  -8   0    1.38    0.32 
  -2  -8   0    1.38    0.30 
  -2  -8   0    1.26    0.38 
   2  -8   0    1.60    0.30 
   2   8   0    1.34    0.20 
   3  -8   0    2.23    0.33 
   3  -8   0    1.78    0.35 
  -3  -8   0    1.95    0.31 
   3  -8   0    2.58    0.37 
  -3  -8   0    2.41    0.41 
   3   8   0    1.95    0.20 
  -4  -8   0   15.10    0.57 
   4  -8   0   15.03    0.59 
   4  -8   0   16.66    0.65 
  -4  -8   0   15.73    0.69 
  -5  -8   0    2.26    0.43 
   5  -8   0    2.96    0.37 
  -5  -8   0    3.08    0.36 
  -6  -8   0   13.41    0.56 
  -6  -8   0   13.16    0.68 
   6  -8   0   13.11    0.67 
  -7  -8   0    2.67    0.46 
  -7  -8   0    2.77    0.40 
   7  -8   0    3.34    0.40 
  -8  -8   0    0.48    0.43 
  -8  -8   0    1.05    0.41 
   8  -8   0    0.92    0.40 
  -9  -8   0   -0.28    0.47 
  -9  -8   0   -0.18    0.44 
   9  -8   0    0.21    0.41 
 -10  -8   0    3.26    0.54 
 -10  -8   0    3.18    0.52 
  10  -8   0    3.19    0.47 
  11  -8   0    1.89    0.47 
 -11  -8   0    1.12    0.52 
 -11  -8   0    0.28    0.56 
  12  -8   0    0.98    0.49 
 -12  -8   0    1.03    0.54 
 -12  -8   0    0.00    0.66 
  13  -8   0    0.34    0.51 
 -13  -8   0   -0.21    0.60 
 -14  -8   0    0.00    0.58 
  14  -8   0    0.74    0.54 
   0  -9   0    0.09    0.40 
   0  -9   0    0.15    0.30 
   0  -9   0   -0.06    0.36 
   0   9   0   -0.35    0.27 
  -1  -9   0    1.88    0.35 
   1  -9   0    1.47    0.41 
   1  -9   0    1.34    0.34 
   1  -9   0    1.69    0.37 
  -1  -9   0    1.39    0.43 
   1   9   0    1.46    0.27 
   2  -9   0    1.48    0.40 
   2  -9   0    0.94    0.35 
  -2  -9   0    0.98    0.42 
   2  -9   0    1.33    0.37 
  -2  -9   0    0.65    0.36 
   2   9   0    0.86    0.24 
   3  -9   0    3.48    0.41 
   3  -9   0    4.47    0.44 
  -3  -9   0    3.59    0.40 
  -3  -9   0    3.48    0.48 
   3  -9   0    4.31    0.42 
  -4  -9   0   -0.55    0.44 
  -4  -9   0    0.01    0.35 
   4  -9   0    0.46    0.40 
   4  -9   0    0.80    0.37 
   5  -9   0    1.72    0.39 
  -5  -9   0    0.19    0.46 
  -5  -9   0    0.98    0.37 
  -6  -9   0    0.42    0.48 
  -6  -9   0    0.29    0.38 
   6  -9   0   -0.55    0.39 
  -7  -9   0    6.58    0.52 
   7  -9   0    7.46    0.51 
  -7  -9   0    7.01    0.58 
  -8  -9   0    0.78    0.51 
   8  -9   0    0.60    0.44 
  -8  -9   0    1.14    0.44 
  -9  -9   0    0.44    0.47 
   9  -9   0    0.53    0.42 
  -9  -9   0   -0.39    0.52 
  10  -9   0    1.31    0.50 
 -10  -9   0    1.53    0.55 
  11  -9   0    0.25    0.51 
 -11  -9   0   -0.01    0.56 
 -12  -9   0   -0.40    0.59 
  12  -9   0    0.30    0.48 
 -13  -9   0    1.23    0.63 
  13  -9   0    2.40    0.59 
   0 -10   0    5.91    0.48 
   0 -10   0    5.61    0.56 
   0  10   0    7.11    0.41 
   1 -10   0    0.62    0.47 
   1 -10   0    0.33    0.37 
   1 -10   0    0.40    0.42 
  -1 -10   0    0.29    0.48 
  -1 -10   0   -0.21    0.40 
   1  10   0    0.00    0.30 
   2 -10   0   -0.06    0.47 
  -2 -10   0    0.41    0.50 
   2 -10   0   -0.31    0.42 
   2 -10   0    0.03    0.39 
  -2 -10   0    0.06    0.40 
  -3 -10   0    0.13    0.40 
   3 -10   0    0.03    0.39 
   3 -10   0    0.43    0.45 
  -3 -10   0    0.05    0.49 
  -4 -10   0    0.83    0.41 
   4 -10   0    0.57    0.45 
   4 -10   0    0.79    0.45 
  -4 -10   0    1.01    0.51 
  -5 -10   0    3.69    0.47 
  -5 -10   0    3.25    0.55 
   5 -10   0    2.95    0.48 
   6 -10   0   -0.30    0.48 
  -6 -10   0    0.21    0.42 
  -6 -10   0   -0.18    0.53 
  -7 -10   0    0.51    0.43 
   7 -10   0    0.33    0.46 
  -7 -10   0    0.01    0.54 
   8 -10   0   -0.18    0.47 
  -8 -10   0    0.37    0.56 
  -9 -10   0    0.48    0.59 
   9 -10   0    0.33    0.51 
  10 -10   0   -0.44    0.53 
 -10 -10   0   -0.07    0.60 
  11 -10   0   -0.53    0.54 
 -11 -10   0   -0.41    0.62 
   0 -11   0    0.56    0.54 
   0 -11   0   -0.12    0.45 
   1 -11   0    0.40    0.44 
   1 -11   0    1.47    0.56 
  -1 -11   0    0.31    0.55 
  -1 -11   0    1.81    0.47 
  -1  11   0    0.25    0.38 
   2 -11   0    1.54    0.45 
  -2 -11   0    0.96    0.45 
  -2 -11   0    0.74    0.56 
   2 -11   0    1.38    0.49 
   2 -11   0    1.69    0.51 
  -3 -11   0    0.07    0.55 
   3 -11   0    0.45    0.50 
  -3 -11   0    0.45    0.45 
   3 -11   0    0.50    0.44 
   4 -11   0    1.42    0.53 
   4 -11   0    1.12    0.47 
  -4 -11   0    0.36    0.44 
  -4 -11   0    0.54    0.58 
  -5 -11   0   -0.03    0.58 
   5 -11   0    0.06    0.47 
  -6 -11   0    1.20    0.60 
   6 -11   0    1.22    0.52 
   7 -11   0    1.09    0.54 
  -7 -11   0    0.61    0.61 
   8 -11   0    2.28    0.57 
  -8 -11   0    1.51    0.63 
   9 -11   0    1.32    0.58 
  -9 -11   0    0.91    0.64 
 -10 -11   0   -0.80    0.65 
  10 -11   0    0.05    0.59 
   0 -12   0    0.16    0.59 
   0 -12   0    0.50    0.50 
  -1 -12   0    0.06    0.50 
   1 -12   0    0.56    0.58 
   1 -12   0    0.36    0.48 
  -1 -12   0   -0.34    0.61 
  -2 -12   0   -0.02    0.48 
  -2 -12   0    0.23    0.61 
   2 -12   0    0.25    0.54 
   3 -12   0    0.46    0.51 
  -3 -12   0    0.55    0.63 
   3 -12   0    0.26    0.55 
  -4 -12   0    0.73    0.65 
   4 -12   0    0.06    0.51 
   5 -12   0    0.79    0.58 
  -5 -12   0    0.24    0.65 
   6 -12   0    0.70    0.57 
  -6 -12   0    0.79    0.67 
  -7 -12   0    0.35    0.68 
   7 -12   0    0.41    0.58 
   0 -13   0    0.35    0.66 
   1 -13   0    0.47    0.68 
   1 -13   0    0.71    0.56 
  -1 -13   0   -0.49    0.70 
  -2 -13   0    0.43    0.70 
   2 -13   0    0.30    0.59 
  -3 -13   0    0.40    0.75 
   3 -13   0    0.27    0.60 
 -17   0   1    2.05    0.60 
 -16   0   1   -0.08    0.56 
  16   0  -1   -0.20    0.40 
  15   0  -1    0.20    0.37 
 -15   0   1    0.37    0.50 
  14   0  -1    0.06    0.34 
 -14   0   1    0.15    0.46 
 -13   0   1   13.58    0.72 
  13   0  -1   15.16    0.59 
 -12   0   1    0.31    0.39 
 -12   0   1   -0.09    0.26 
  12   0  -1    0.01    0.28 
  11   0  -1   18.08    0.57 
 -11   0   1   19.14    0.59 
 -11   0   1   16.79    0.65 
 -10   0   1    0.31    0.31 
 -10   0   1   -0.09    0.21 
  10   0  -1    0.39    0.22 
  -9   0   1   12.09    0.52 
  -9   0   1   11.03    0.40 
   9   0  -1   10.98    0.39 
   8   0  -1    0.18    0.17 
  -8   0   1    0.28    0.24 
  -8   0   1    0.20    0.16 
   7   0  -1   14.30    0.40 
  -7   0   1   14.57    0.49 
  -7   0   1   14.42    0.39 
   6   0  -1    0.25    0.12 
  -6   0   1    0.07    0.17 
  -6   0   1    0.06    0.11 
  -5   0   1   46.25    0.98 
  -5   0   1   45.66    1.08 
   5   0  -1   45.95    0.91 
   4   0  -1    0.00    0.08 
  -4   0   1    0.03    0.10 
  -4   0   1    0.08    0.07 
   3   0  -1   73.04    1.39 
  -3   0   1   73.81    1.51 
  -3   0   1   71.37    1.63 
  -2   0   1    0.02    0.06 
   2   0  -1   -0.07    0.04 
  -2   0   1   -0.14    0.04 
  -1   0   1   29.70    0.68 
  -1   0   1   30.38    0.63 
   1   0  -1   30.32    0.58 
   0   0   1   -0.04    0.01 
   0   0   1   -0.05    0.01 
   0   0  -1   -0.02    0.01 
   1   0   1   26.66    0.52 
   2   0   1    0.02    0.04 
   3   0   1  449.63    8.63 
  -3   0  -1  465.80    9.43 
   4   0   1    0.08    0.08 
  -4   0  -1   -0.03    0.08 
  -5   0  -1   92.94    2.11 
  -5   0  -1   94.71    1.97 
   5   0   1   95.25    1.81 
  -6   0  -1   -0.06    0.13 
  -6   0  -1    0.02    0.15 
   6   0   1    0.29    0.12 
  -7   0  -1    2.28    0.17 
  -7   0  -1    2.38    0.22 
   7   0   1    2.62    0.17 
   8   0   1    0.21    0.17 
  -8   0  -1   -0.21    0.17 
  -8   0  -1    0.04    0.22 
  -9   0  -1    8.81    0.38 
  -9   0  -1    8.63    0.45 
   9   0   1    9.28    0.39 
 -10   0  -1    0.39    0.29 
  10   0   1   -0.18    0.23 
 -10   0  -1    0.03    0.22 
 -11   0  -1    5.86    0.42 
  11   0   1    5.95    0.40 
 -11   0  -1    6.16    0.45 
 -12   0  -1    0.27    0.29 
  12   0   1    0.16    0.27 
 -12   0  -1    0.68    0.37 
 -13   0  -1    8.45    0.55 
  13   0   1    8.80    0.49 
 -13   0  -1    8.37    0.66 
 -14   0  -1    0.32    0.45 
  14   0   1    0.16    0.33 
  15   0   1    4.91    0.43 
 -15   0  -1    4.49    0.55 
  16   0   1   -0.03    0.38 
 -16   0  -1    0.53    0.55 
  17   0   1    0.55    0.45 
 -17   0  -1    1.30    0.57 
 -17  -1   1    1.24    0.62 
  17  -1  -1    0.27    0.43 
 -17   1   1    0.91    0.58 
  16  -1  -1   -0.32    0.42 
 -16  -1   1    1.19    0.57 
 -16   1   1    0.48    0.54 
 -15  -1   1    0.65    0.51 
  15  -1  -1   -0.08    0.37 
 -15   1   1    0.05    0.51 
  15   1  -1   -0.16    0.35 
  14  -1  -1    0.44    0.34 
 -14  -1   1    0.68    0.51 
 -14   1   1    0.53    0.47 
  14   1  -1    0.14    0.32 
  13  -1  -1    1.87    0.33 
 -13  -1   1    2.67    0.35 
 -13  -1   1    2.57    0.48 
  13   1  -1    2.32    0.31 
 -13   1   1    2.04    0.45 
  12  -1  -1   -0.09    0.28 
 -12  -1   1    0.72    0.41 
 -12  -1   1    0.04    0.30 
 -12   1   1    0.59    0.38 
  12   1  -1   -0.34    0.26 
  11  -1  -1   21.23    0.63 
 -11  -1   1   22.66    0.80 
 -11  -1   1   22.94    0.66 
 -11   1   1   22.90    0.62 
  11   1  -1   23.07    0.62 
 -11   1   1   22.00    0.76 
  10  -1  -1   19.80    0.57 
 -10  -1   1   20.16    0.72 
 -10  -1   1   19.10    0.58 
 -10   1   1   19.17    0.67 
 -10   1   1   20.59    0.55 
  10   1  -1   19.42    0.54 
  -9  -1   1   32.76    0.93 
   9  -1  -1   33.05    0.76 
  -9  -1   1   33.76    0.82 
  -9   1   1   32.82    0.91 
   9   1  -1   33.82    0.74 
  -9   1   1   32.65    0.76 
  -8  -1   1   12.57    0.53 
   8  -1  -1   12.80    0.41 
  -8  -1   1   12.38    0.42 
   8   1  -1   12.63    0.37 
  -8   1   1   12.92    0.37 
  -8   1   1   12.67    0.46 
  -7  -1   1    0.37    0.16 
  -7  -1   1    0.24    0.23 
   7  -1  -1    0.28    0.15 
   7   1  -1    0.24    0.13 
  -7   1   1    0.57    0.12 
  -7   1   1    0.61    0.20 
   6  -1  -1   50.23    1.01 
  -6  -1   1   49.34    1.19 
  -6  -1   1   50.53    1.08 
  -6   1   1   48.63    1.17 
   6   1  -1   50.62    0.98 
  -6   1   1   48.95    1.05 
  -5  -1   1  104.03    2.18 
  -5  -1   1  105.26    2.37 
   5  -1  -1  105.03    2.01 
  -5   1   1  102.29    2.34 
   5   1  -1  105.92    1.99 
  -5   1   1  103.91    2.16 
  -4  -1   1  123.04    2.54 
   4  -1  -1  123.22    2.34 
  -4  -1   1  122.39    2.75 
   4   1  -1  122.44    2.32 
  -4   1   1  120.90    2.52 
  -3  -1   1    7.67    0.26 
  -3  -1   1    8.32    0.23 
   3  -1  -1    8.87    0.22 
   3   1  -1    8.57    0.19 
  -2  -1   1  111.31    2.45 
  -2  -1   1  112.20    2.28 
   2  -1  -1  108.51    2.10 
   2   1  -1  109.27    2.07 
  -1  -1   1    1.49    0.09 
   1  -1  -1    1.52    0.06 
   1  -1  -1    1.47    0.08 
  -1  -1   1    1.53    0.09 
   0  -1  -1    0.67    0.05 
   0  -1  -1    0.70    0.06 
   0  -1   1    0.55    0.06 
   0  -1   1    0.59    0.06 
   0  -1   1    0.62    0.05 
   0   1   1    0.67    0.07 
  -1  -1  -1    0.92    0.06 
   1  -1   1    1.10    0.08 
  -1  -1  -1    0.91    0.06 
   1  -1   1    1.04    0.07 
   1   1   1    0.89    0.07 
   2  -1   1   60.69    1.31 
  -2  -1  -1   56.45    1.31 
  -2  -1  -1   58.86    1.23 
   2  -1   1   58.41    1.13 
   2   1   1   58.01    1.12 
   3  -1   1   38.65    0.76 
  -3  -1  -1   38.59    0.83 
  -3  -1  -1   38.69    0.89 
   3   1   1   39.00    0.75 
  -4  -1  -1   28.42    0.64 
  -4  -1  -1   28.47    0.69 
   4  -1   1   28.35    0.59 
   4   1   1   28.37    0.57 
  -5  -1  -1   96.94    2.06 
   5  -1   1   97.95    1.89 
  -5  -1  -1   99.48    2.21 
   5   1   1   97.68    1.88 
  -6  -1  -1   77.36    1.79 
  -6  -1  -1   77.42    1.65 
   6  -1   1   77.92    1.52 
  -6   1  -1   78.21    1.63 
   6   1   1   77.37    1.50 
  -7  -1  -1    8.84    0.38 
  -7  -1  -1    7.75    0.32 
   7  -1   1    7.89    0.32 
  -7   1  -1    8.17    0.31 
   7   1   1    7.72    0.29 
  -8  -1  -1    1.65    0.21 
  -8  -1  -1    2.26    0.28 
   8  -1   1    1.63    0.19 
  -8   1  -1    2.23    0.18 
   8   1   1    1.95    0.17 
  -8   1  -1    2.15    0.25 
  -9  -1  -1    0.58    0.29 
   9  -1   1    0.03    0.20 
  -9  -1  -1    0.15    0.22 
  -9   1  -1    0.40    0.27 
  -9   1  -1    0.40    0.18 
   9   1   1    0.13    0.18 
 -10  -1  -1   14.30    0.52 
 -10  -1  -1   14.68    0.60 
  10  -1   1   13.88    0.49 
 -10   1  -1   13.68    0.59 
  10   1   1   14.46    0.45 
 -10   1  -1   14.39    0.48 
 -11  -1  -1   40.61    1.15 
 -11  -1  -1   40.87    1.01 
  11  -1   1   40.28    0.94 
  11   1   1   41.86    0.93 
 -11   1  -1   41.63    0.98 
 -11   1  -1   40.42    1.12 
 -12  -1  -1   12.91    0.64 
 -12  -1  -1   11.97    0.56 
  12  -1   1   10.92    0.51 
 -12   1  -1   11.99    0.51 
 -12   1  -1   12.14    0.61 
  12   1   1   11.23    0.47 
 -13  -1  -1    0.88    0.43 
  13  -1   1    0.32    0.33 
 -13  -1  -1    1.05    0.34 
  13   1   1    0.69    0.30 
 -13   1  -1    0.76    0.41 
  14  -1   1    0.30    0.36 
 -14  -1  -1    0.42    0.37 
 -14  -1  -1    0.40    0.46 
 -14   1  -1    0.09    0.44 
  14   1   1    0.39    0.33 
  15  -1   1    1.08    0.41 
 -15  -1  -1    1.42    0.51 
  15   1   1    0.92    0.37 
 -15   1  -1    0.95    0.49 
  16  -1   1    2.42    0.45 
 -16  -1  -1    2.49    0.57 
  16   1   1    2.01    0.41 
 -16   1  -1    2.26    0.56 
  17  -1   1   -0.42    0.43 
 -17  -1  -1    0.93    0.56 
 -17   1  -1    0.69    0.59 
 -17  -2   1    1.12    0.57 
  17  -2  -1   -0.09    0.45 
 -17   2   1    0.42    0.60 
  16  -2  -1    0.63    0.45 
 -16  -2   1    1.46    0.58 
 -16   2   1    1.23    0.57 
  15  -2  -1    1.03    0.42 
 -15  -2   1    1.77    0.56 
 -15   2   1    1.59    0.53 
  14  -2  -1    1.45    0.38 
 -14  -2   1    2.04    0.53 
 -14  -2   1    1.90    0.39 
 -14   2   1    2.92    0.49 
  13  -2  -1   10.42    0.55 
 -13  -2   1    9.49    0.57 
 -13  -2   1    9.87    0.68 
  13   2  -1   10.79    0.52 
  12  -2  -1   18.11    0.62 
 -12  -2   1   18.32    0.78 
 -12  -2   1   19.16    0.70 
 -12   2   1   17.20    0.73 
  12   2  -1   18.10    0.55 
  11  -2  -1    5.68    0.35 
 -11  -2   1    6.29    0.48 
 -11  -2   1    6.42    0.49 
 -11   2   1    6.77    0.56 
  11   2  -1    6.67    0.41 
  10  -2  -1   18.60    0.58 
 -10  -2   1   18.79    0.61 
 -10  -2   1   20.06    0.74 
  10   2  -1   19.14    0.51 
 -10   2   1   18.81    0.69 
 -10   2   1   19.07    0.51 
  -9  -2   1   15.79    0.51 
   9  -2  -1   16.03    0.51 
  -9  -2   1   16.85    0.65 
  -9   2   1   15.72    0.43 
  -9   2   1   15.62    0.59 
   9   2  -1   15.69    0.44 
  -8  -2   1    4.21    0.26 
   8  -2  -1    4.83    0.34 
  -8  -2   1    4.90    0.36 
  -8   2   1    4.56    0.39 
  -8   2   1    4.71    0.24 
   8   2  -1    4.91    0.26 
  -7  -2   1    6.37    0.43 
   7  -2  -1    6.12    0.32 
  -7  -2   1    5.62    0.34 
  -7   2   1    6.10    0.23 
   7   2  -1    5.56    0.23 
   6  -2  -1    2.49    0.18 
  -6  -2   1    2.84    0.19 
  -6  -2   1    2.48    0.27 
  -6   2   1    2.92    0.16 
   6   2  -1    2.97    0.17 
   5  -2  -1  120.48    2.32 
  -5  -2   1  117.93    2.72 
  -5  -2   1  121.91    2.52 
   5   2  -1  120.83    2.28 
  -4  -2   1  104.78    2.18 
   4  -2  -1  103.35    2.00 
  -4  -2   1  105.31    2.35 
   4   2  -1  101.83    1.96 
  -3  -2   1   -0.10    0.11 
   3  -2  -1    0.20    0.09 
  -3  -2   1   -0.08    0.12 
   3   2  -1    0.24    0.04 
   2  -2  -1  306.64    6.43 
  -2  -2   1  318.47    6.47 
   2  -2  -1  312.33    5.92 
  -2  -2   1  311.09    6.89 
  -1  -2   1  122.83    2.66 
  -1  -2   1  118.05    2.27 
  -1  -2   1  119.16    2.50 
   1  -2  -1  123.68    2.66 
   1  -2  -1  117.83    2.29 
   1  -2  -1  119.91    2.49 
   0  -2   1    4.29    0.13 
   0  -2  -1    4.29    0.14 
   0  -2   1    4.43    0.18 
   0  -2  -1    4.42    0.14 
   0  -2   1    4.46    0.16 
   0  -2  -1    4.68    0.16 
   1  -2   1  571.69   12.43 
  -1  -2  -1  557.11   11.63 
  -1  -2  -1  588.27   12.94 
   1  -2   1  550.93   10.64 
   1   2   1  551.82   11.35 
  -2  -2  -1  152.48    3.16 
   2  -2   1  153.77    3.38 
   2  -2   1  151.21    2.90 
  -2  -2  -1  153.91    3.37 
   2   2   1  152.18    2.88 
   3  -2   1   18.49    0.48 
   3  -2   1   18.49    0.42 
  -3  -2  -1   18.82    0.46 
  -3  -2  -1   19.41    0.49 
   3   2   1   19.00    0.39 
  -4  -2  -1   39.82    0.88 
  -4  -2  -1   40.10    0.95 
   4  -2   1   40.09    0.80 
   4   2   1   39.33    0.78 
   5  -2   1    1.72    0.14 
  -5  -2  -1    1.86    0.16 
  -5  -2  -1    1.86    0.20 
   5   2   1    2.09    0.15 
  -6  -2  -1   18.18    0.49 
  -6  -2  -1   17.80    0.56 
   6  -2   1   18.05    0.46 
   6   2   1   18.00    0.42 
  -7  -2  -1    9.79    0.45 
  -7  -2  -1    9.02    0.37 
   7  -2   1    9.29    0.36 
   7   2   1    9.54    0.30 
  -8  -2  -1   19.15    0.56 
   8  -2   1   19.51    0.53 
  -8  -2  -1   20.18    0.65 
   8   2   1   19.08    0.47 
  -8   2  -1   18.94    0.51 
  -9  -2  -1   24.62    0.81 
   9  -2   1   25.11    0.64 
  -9  -2  -1   23.64    0.69 
  -9   2  -1   23.98    0.61 
   9   2   1   24.48    0.58 
 -10  -2  -1    6.54    0.53 
  10  -2   1    6.06    0.42 
 -10  -2  -1    6.31    0.47 
 -10   2  -1    6.37    0.38 
 -10   2  -1    7.44    0.50 
  10   2   1    7.12    0.37 
  11  -2   1    8.78    0.48 
 -11  -2  -1    9.86    0.53 
 -11  -2  -1    9.52    0.60 
 -11   2  -1    9.07    0.44 
 -11   2  -1    9.46    0.58 
  11   2   1    8.71    0.42 
 -12  -2  -1    6.39    0.50 
 -12  -2  -1    5.71    0.40 
  12  -2   1    5.97    0.38 
 -12   2  -1    6.20    0.41 
  12   2   1    6.15    0.42 
 -12   2  -1    6.13    0.48 
 -13  -2  -1    0.55    0.47 
  13  -2   1    0.80    0.34 
 -13  -2  -1    0.23    0.37 
 -13   2  -1    0.41    0.45 
  13   2   1   -0.04    0.28 
 -14  -2  -1    9.87    0.74 
 -14  -2  -1    9.13    0.62 
  14  -2   1    7.60    0.55 
 -14   2  -1    7.57    0.65 
  14   2   1    8.35    0.55 
 -15  -2  -1    1.93    0.45 
 -15  -2  -1    2.13    0.53 
  15  -2   1    2.19    0.42 
 -15   2  -1    1.98    0.51 
  16  -2   1    0.07    0.43 
 -16  -2  -1    1.14    0.57 
 -16   2  -1    0.45    0.55 
  17  -2   1    0.03    0.48 
 -17  -2  -1    0.75    0.56 
 -17   2  -1    0.03    0.58 
 -17  -3   1    1.11    0.62 
  17  -3  -1    0.08    0.48 
 -17   3   1   -0.37    0.60 
 -16  -3   1    1.11    0.56 
  16  -3  -1    0.01    0.47 
 -16   3   1   -0.40    0.57 
  15  -3  -1    1.53    0.43 
 -15  -3   1    1.34    0.45 
 -15  -3   1    2.95    0.59 
 -15   3   1    1.62    0.53 
 -14  -3   1    1.26    0.55 
 -14  -3   1    0.52    0.41 
  14  -3  -1    0.83    0.39 
 -14   3   1    1.37    0.50 
 -13  -3   1   13.11    0.63 
 -13  -3   1   16.46    0.82 
  13  -3  -1   12.33    0.62 
 -13   3   1   13.82    0.77 
  12  -3  -1    0.63    0.33 
 -12  -3   1    0.35    0.33 
 -12  -3   1    1.34    0.45 
  12   3  -1    0.07    0.23 
 -12   3   1    0.27    0.42 
  11  -3  -1    0.73    0.27 
 -11  -3   1    0.25    0.30 
 -11  -3   1    0.59    0.44 
  11   3  -1   -0.47    0.21 
 -11   3   1    0.62    0.39 
 -10  -3   1   48.26    1.16 
 -10  -3   1   50.59    1.35 
  10  -3  -1   48.29    1.10 
  10   3  -1   48.27    1.00 
 -10   3   1   47.56    1.26 
  -9  -3   1    1.38    0.37 
  -9  -3   1    1.35    0.26 
   9  -3  -1    1.75    0.24 
  -9   3   1    1.59    0.16 
   9   3  -1    1.36    0.16 
   8  -3  -1    6.17    0.39 
  -8  -3   1    6.64    0.42 
  -8  -3   1    5.96    0.36 
  -8   3   1    6.28    0.25 
   8   3  -1    6.79    0.26 
   7  -3  -1   26.74    0.66 
  -7  -3   1   26.07    0.83 
  -7  -3   1   27.53    0.70 
   7   3  -1   26.98    0.56 
  -6  -3   1   10.18    0.38 
   6  -3  -1   10.32    0.38 
  -6  -3   1    9.96    0.47 
   6   3  -1   10.43    0.26 
  -5  -3   1   24.16    0.62 
   5  -3  -1   24.28    0.58 
  -5  -3   1   24.68    0.68 
   5   3  -1   24.34    0.49 
  -4  -3   1   14.83    0.42 
  -4  -3   1   14.41    0.45 
   4  -3  -1   14.90    0.40 
   4   3  -1   14.31    0.30 
  -3  -3   1   48.45    1.06 
   3  -3  -1   48.06    0.97 
  -3  -3   1   47.73    1.11 
   3   3  -1   46.86    0.91 
   2  -3  -1   36.97    0.82 
  -2  -3   1   38.03    0.89 
   2  -3  -1   38.11    0.78 
   2  -3  -1   38.37    0.89 
  -2  -3   1   38.19    0.85 
   2   3  -1   38.10    0.73 
   1  -3  -1    2.44    0.17 
  -1  -3   1    3.00    0.20 
  -1  -3   1    2.61    0.14 
   1  -3  -1    3.11    0.17 
   1  -3  -1    2.59    0.18 
  -1  -3   1    2.92    0.17 
   0  -3  -1   28.69    0.66 
   0  -3   1   27.96    0.67 
   0  -3   1   28.13    0.65 
   0  -3  -1   28.82    0.64 
   0  -3  -1   28.17    0.58 
   0  -3   1   27.56    0.57 
   1  -3   1  134.39    2.58 
  -1  -3  -1  137.92    3.00 
   1  -3   1  133.99    2.82 
   1  -3   1  133.94    3.01 
  -1  -3  -1  135.57    2.83 
   1   3   1  137.11    2.57 
   2  -3   1    5.93    0.20 
  -2  -3  -1    5.91    0.24 
  -2  -3  -1    6.01    0.21 
   2  -3   1    5.60    0.24 
   2   3   1    5.82    0.18 
   3  -3   1   32.13    0.78 
  -3  -3  -1   32.81    0.76 
  -3  -3  -1   31.89    0.74 
   3  -3   1   32.21    0.68 
   3   3   1   32.65    0.64 
  -4  -3  -1   60.83    1.37 
  -4  -3  -1   58.80    1.30 
   4  -3   1   59.22    1.19 
   4   3   1   59.33    1.15 
  -5  -3  -1    0.48    0.18 
   5  -3   1    0.32    0.14 
  -5  -3  -1    0.26    0.19 
   5   3   1    0.48    0.10 
  -6  -3  -1   34.75    0.92 
  -6  -3  -1   34.46    0.83 
   6  -3   1   34.53    0.75 
   6   3   1   34.45    0.70 
   7  -3   1  126.53    2.44 
  -7  -3  -1  119.39    2.86 
  -7  -3  -1  125.36    2.65 
   7   3   1  127.82    2.39 
  -8  -3  -1   -0.56    0.29 
   8  -3   1   -0.01    0.19 
  -8  -3  -1    0.03    0.24 
   8   3   1    0.03    0.14 
  -9  -3  -1    1.21    0.37 
   9  -3   1    0.92    0.25 
  -9  -3  -1    1.02    0.27 
   9   3   1    1.01    0.18 
 -10  -3  -1    0.45    0.29 
  10  -3   1    0.72    0.25 
 -10  -3  -1    1.46    0.41 
  10   3   1    0.32    0.19 
 -10   3  -1    0.37    0.21 
 -11  -3  -1    8.13    0.61 
  11  -3   1    7.57    0.49 
 -11  -3  -1    6.88    0.55 
  11   3   1    7.18    0.40 
 -11   3  -1    7.69    0.42 
 -12  -3  -1    6.03    0.54 
  12  -3   1    4.23    0.38 
 -12  -3  -1    5.51    0.42 
 -12   3  -1    4.78    0.47 
  12   3   1    4.92    0.29 
 -13  -3  -1    0.61    0.41 
 -13  -3  -1    1.86    0.48 
  13  -3   1    0.59    0.36 
 -13   3  -1    1.65    0.48 
  13   3   1    0.50    0.27 
  14  -3   1    0.20    0.39 
 -14  -3  -1    0.15    0.42 
 -14  -3  -1    0.72    0.49 
 -14   3  -1    0.51    0.50 
  15  -3   1    1.95    0.44 
 -15  -3  -1    1.79    0.48 
 -15  -3  -1    3.03    0.59 
 -15   3  -1    1.76    0.56 
 -16  -3  -1    1.77    0.60 
  16  -3   1    0.56    0.48 
 -16   3  -1    0.32    0.55 
  17  -3   1    1.22    0.50 
 -17  -3  -1    2.41    0.63 
 -17   3  -1    0.80    0.61 
 -17  -4   1    2.21    0.68 
  17  -4  -1    1.12    0.52 
 -17   4   1    0.81    0.64 
  16  -4  -1    1.34    0.49 
 -16  -4   1    2.43    0.63 
 -16   4   1    1.47    0.60 
 -15  -4   1    1.29    0.58 
  15  -4  -1    0.67    0.44 
 -15  -4   1    0.66    0.49 
 -15   4   1    1.30    0.55 
 -14  -4   1    1.65    0.59 
 -14  -4   1    0.03    0.45 
  14  -4  -1    0.25    0.41 
 -14   4   1    0.70    0.54 
 -13  -4   1    4.60    0.62 
  13  -4  -1    3.63    0.42 
 -13  -4   1    4.32    0.46 
 -13   4   1    4.53    0.54 
  12  -4  -1    4.77    0.40 
 -12  -4   1    6.00    0.57 
 -12  -4   1    4.73    0.44 
 -12   4   1    4.35    0.50 
 -11  -4   1   16.43    0.86 
 -11  -4   1   18.71    0.65 
  11  -4  -1   18.32    0.65 
 -11   4   1   17.67    0.73 
 -10  -4   1    1.84    0.34 
  10  -4  -1    1.17    0.28 
 -10  -4   1    0.89    0.45 
   9  -4  -1    7.48    0.48 
  -9  -4   1    7.77    0.46 
  -9  -4   1    7.59    0.53 
   9   4  -1    7.46    0.30 
  -8  -4   1   30.47    0.82 
   8  -4  -1   30.14    0.75 
  -8  -4   1   31.55    0.98 
   8   4  -1   31.90    0.64 
   7  -4  -1   13.42    0.44 
  -7  -4   1   12.98    0.49 
  -7  -4   1   12.54    0.62 
   7   4  -1   13.23    0.32 
   6  -4  -1   43.30    0.93 
  -6  -4   1   40.72    0.99 
  -6  -4   1   42.41    1.07 
   6   4  -1   41.52    0.81 
   5  -4  -1   14.13    0.45 
  -5  -4   1   14.71    0.50 
  -5  -4   1   14.51    0.48 
   5   4  -1   14.68    0.31 
  -4  -4   1    0.37    0.20 
  -4  -4   1    0.39    0.18 
   4  -4  -1    0.34    0.17 
   4   4  -1    0.33    0.06 
   3  -4  -1   48.72    0.99 
  -3  -4   1   47.86    1.08 
  -3  -4   1   47.11    1.12 
   3  -4  -1   47.10    1.04 
   3  -4  -1   46.82    1.11 
   3   4  -1   47.63    0.91 
   2  -4  -1   10.53    0.33 
   2  -4  -1   10.77    0.34 
   2  -4  -1   10.88    0.35 
  -2  -4   1   10.70    0.37 
  -2  -4   1   10.30    0.34 
   2   4  -1   10.65    0.26 
  -1  -4   1   73.90    1.45 
  -1  -4   1   76.18    1.62 
   1  -4  -1   73.83    1.47 
  -1  -4   1   75.22    1.70 
   1  -4  -1   75.36    1.69 
   1  -4  -1   74.76    1.60 
   0  -4   1    0.55    0.15 
   0  -4  -1    0.38    0.13 
   0  -4  -1    0.73    0.16 
   0  -4   1    0.58    0.11 
   0  -4  -1    0.54    0.14 
   0  -4   1    0.48    0.16 
  -1  -4  -1   14.42    0.39 
   1  -4   1   14.47    0.42 
   1  -4   1   14.34    0.36 
   1  -4   1   14.39    0.42 
  -1  -4  -1   14.65    0.42 
   1   4   1   14.19    0.35 
  -2  -4  -1   10.24    0.34 
  -2  -4  -1   10.46    0.32 
   2  -4   1   10.56    0.35 
   2  -4   1   10.81    0.31 
   2  -4   1   10.51    0.35 
   2   4   1   10.72    0.28 
   3  -4   1   10.52    0.37 
  -3  -4  -1   10.67    0.33 
   3  -4   1   10.83    0.34 
  -3  -4  -1   10.62    0.40 
   3   4   1   10.55    0.27 
   4  -4   1   -0.12    0.15 
  -4  -4  -1   -0.10    0.19 
   4  -4   1    0.06    0.21 
  -4  -4  -1    0.06    0.17 
   4   4   1   -0.03    0.09 
  -5  -4  -1    4.00    0.27 
  -5  -4  -1    4.08    0.31 
   5  -4   1    4.69    0.32 
   5   4   1    4.23    0.20 
  -6  -4  -1   63.67    1.48 
   6  -4   1   61.29    1.27 
  -6  -4  -1   59.77    1.38 
   6   4   1   60.10    1.19 
   7  -4   1   25.93    0.66 
  -7  -4  -1   25.71    0.79 
  -7  -4  -1   24.64    0.71 
   7   4   1   25.07    0.55 
  -8  -4  -1   23.85    0.82 
   8  -4   1   24.55    0.64 
  -8  -4  -1   22.76    0.71 
   8   4   1   24.50    0.55 
  -9  -4  -1   19.68    0.78 
   9  -4   1   22.56    0.62 
  -9  -4  -1   22.27    0.73 
   9   4   1   22.36    0.52 
 -10  -4  -1    6.91    0.51 
  10  -4   1    7.36    0.50 
 -10  -4  -1    7.46    0.55 
  10   4   1    7.72    0.34 
 -11  -4  -1   -0.40    0.45 
  11  -4   1    0.17    0.32 
 -11  -4  -1   -0.16    0.37 
  11   4   1   -0.04    0.21 
  12  -4   1    1.11    0.36 
 -12  -4  -1    0.76    0.41 
 -12  -4  -1    1.19    0.51 
 -13  -4  -1   10.50    0.64 
 -13  -4  -1   11.65    0.82 
  13  -4   1   10.57    0.62 
 -13   4  -1   10.71    0.75 
 -14  -4  -1    1.63    0.57 
 -14  -4  -1    0.43    0.44 
  14  -4   1    1.34    0.42 
 -14   4  -1    0.55    0.54 
 -15  -4  -1    2.12    0.62 
  15  -4   1    0.68    0.40 
 -15  -4  -1    1.10    0.50 
 -15   4  -1    1.28    0.58 
  16  -4   1    0.22    0.47 
 -16  -4  -1    1.58    0.63 
 -16  -4  -1   -0.12    0.53 
 -16   4  -1    1.60    0.68 
 -17  -4  -1    0.79    0.61 
  17  -4   1   -0.95    0.52 
 -17   4  -1    0.10    0.65 
 -16  -5   1    2.60    0.58 
 -16  -5   1    3.77    0.73 
  16  -5  -1    1.99    0.53 
 -16   5   1    2.27    0.63 
 -15  -5   1    0.08    0.53 
  15  -5  -1    0.16    0.48 
 -15  -5   1    1.18    0.63 
 -15   5   1   -0.05    0.59 
  14  -5  -1    4.91    0.49 
 -14  -5   1    5.74    0.68 
 -14  -5   1    5.12    0.55 
 -14   5   1    6.02    0.62 
  13  -5  -1   -0.11    0.40 
 -13  -5   1    0.54    0.57 
 -13  -5   1    0.33    0.43 
 -13   5   1   -0.20    0.51 
 -12  -5   1    1.73    0.56 
 -12  -5   1    2.61    0.43 
  12  -5  -1    1.71    0.36 
 -12   5   1    2.65    0.49 
  11  -5  -1    0.90    0.32 
 -11  -5   1   -0.04    0.48 
 -11  -5   1    1.11    0.39 
 -10  -5   1    1.43    0.47 
 -10  -5   1    1.42    0.39 
  10  -5  -1    1.33    0.34 
  -9  -5   1    0.82    0.33 
  -9  -5   1    0.86    0.41 
   9  -5  -1    0.95    0.31 
  -8  -5   1   -0.15    0.38 
   8  -5  -1    0.34    0.25 
  -8  -5   1    0.08    0.31 
   7  -5  -1    0.37    0.25 
  -7  -5   1    0.94    0.32 
  -7  -5   1    0.62    0.30 
   7   5  -1    0.48    0.10 
   6  -5  -1    8.39    0.44 
  -6  -5   1    7.38    0.44 
  -6  -5   1    7.15    0.44 
   6   5  -1    7.20    0.20 
  -5  -5   1    1.57    0.28 
   5  -5  -1    1.62    0.23 
  -5  -5   1    1.35    0.25 
   5   5  -1    1.49    0.09 
   4  -5  -1   56.74    1.18 
  -4  -5   1   56.61    1.28 
  -4  -5   1   54.84    1.33 
   4   5  -1   55.25    1.07 
   3  -5  -1   48.97    1.17 
  -3  -5   1   49.28    1.18 
  -3  -5   1   50.01    1.15 
   3  -5  -1   50.47    1.06 
   3  -5  -1   49.41    1.11 
   3   5  -1   49.85    0.97 
  -2  -5   1   29.93    0.75 
   2  -5  -1   28.22    0.72 
  -2  -5   1   29.86    0.75 
   2  -5  -1   29.10    0.68 
   2  -5  -1   29.04    0.73 
   2   5  -1   29.34    0.61 
   1  -5  -1   29.50    0.72 
  -1  -5   1   29.02    0.62 
   1  -5  -1   28.88    0.71 
  -1  -5   1   29.34    0.74 
  -1  -5   1   29.41    0.74 
   1  -5  -1   29.59    0.67 
   0  -5   1  117.83    2.59 
   0  -5  -1  113.88    2.44 
   0  -5  -1  114.98    2.58 
   0  -5   1  112.20    2.22 
   0  -5  -1  115.32    2.23 
   0  -5   1  115.31    2.45 
   1  -5   1    5.10    0.29 
   1  -5   1    4.48    0.32 
  -1  -5  -1    4.71    0.32 
  -1  -5  -1    4.52    0.26 
   1  -5   1    5.07    0.27 
   1   5   1    5.05    0.26 
   2  -5   1   20.14    0.56 
   2  -5   1   20.27    0.58 
  -2  -5  -1   21.25    0.58 
   2  -5   1   20.42    0.53 
  -2  -5  -1   21.05    0.55 
   2   5   1   21.12    0.48 
  -3  -5  -1    6.62    0.38 
  -3  -5  -1    5.93    0.30 
   3  -5   1    6.48    0.34 
   3  -5   1    6.65    0.34 
   3   5   1    6.05    0.24 
   4  -5   1    1.96    0.27 
  -4  -5  -1    1.98    0.21 
  -4  -5  -1    1.86    0.26 
   4  -5   1    1.71    0.21 
   4   5   1    2.02    0.14 
   5  -5   1    5.90    0.37 
  -5  -5  -1    5.41    0.39 
  -5  -5  -1    5.32    0.32 
   5   5   1    5.92    0.24 
   6  -5   1   19.83    0.58 
  -6  -5  -1   19.22    0.62 
  -6  -5  -1   20.18    0.65 
   6   5   1   20.00    0.45 
  -7  -5  -1    5.21    0.41 
   7  -5   1    5.33    0.37 
  -7  -5  -1    5.06    0.36 
   7   5   1    5.16    0.24 
  -8  -5  -1    9.89    0.55 
  -8  -5  -1    9.31    0.53 
   8  -5   1   10.30    0.45 
   8   5   1   10.33    0.33 
  -9  -5  -1   -0.02    0.34 
   9  -5   1    0.37    0.29 
  -9  -5  -1   -0.72    0.39 
   9   5   1   -0.18    0.17 
 -10  -5  -1    2.28    0.49 
 -10  -5  -1    2.38    0.39 
  10  -5   1    2.39    0.35 
 -11  -5  -1    0.13    0.39 
  11  -5   1    0.41    0.35 
 -11  -5  -1   -0.87    0.49 
 -12  -5  -1    0.83    0.55 
 -12  -5  -1    1.61    0.45 
  12  -5   1    1.77    0.39 
 -13  -5  -1    0.42    0.47 
 -13  -5  -1   -0.04    0.58 
  13  -5   1    0.68    0.37 
  14  -5   1    0.09    0.43 
 -14  -5  -1    0.49    0.48 
 -14  -5  -1    1.69    0.63 
 -14   5  -1    1.30    0.58 
  15  -5   1   -0.11    0.47 
 -15  -5  -1   -0.61    0.49 
 -15  -5  -1    1.32    0.65 
 -15   5  -1    0.81    0.62 
 -16  -5  -1    1.00    0.53 
  16  -5   1    0.59    0.50 
 -16  -5  -1    2.49    0.69 
 -16   5  -1    1.22    0.66 
 -16  -6   1    0.87    0.71 
 -16  -6   1   -0.17    0.59 
  16  -6  -1   -0.23    0.53 
 -15  -6   1    0.11    0.68 
 -15  -6   1    0.43    0.57 
  15  -6  -1    0.19    0.50 
 -15   6   1    0.12    0.64 
 -14  -6   1   -0.55    0.61 
  14  -6  -1    1.44    0.48 
 -14  -6   1    2.10    0.56 
 -14   6   1    1.14    0.62 
 -13  -6   1   -0.15    0.48 
 -13  -6   1   -0.74    0.63 
  13  -6  -1   -0.19    0.44 
 -13   6   1    0.32    0.55 
 -12  -6   1    2.47    0.64 
  12  -6  -1    3.49    0.42 
 -12  -6   1    3.01    0.51 
 -11  -6   1   -0.05    0.42 
  11  -6  -1    0.46    0.39 
 -11  -6   1   -1.03    0.50 
 -10  -6   1   -0.85    0.49 
  10  -6  -1   -0.25    0.35 
 -10  -6   1   -0.17    0.39 
  -9  -6   1    1.77    0.44 
   9  -6  -1    0.75    0.34 
  -9  -6   1    0.96    0.38 
  -8  -6   1   15.17    0.65 
  -8  -6   1   16.42    0.69 
   8  -6  -1   17.76    0.65 
  -7  -6   1   20.47    0.69 
  -7  -6   1   20.79    0.67 
   7  -6  -1   21.68    0.64 
  -6  -6   1   34.95    0.94 
   6  -6  -1   35.76    0.88 
  -6  -6   1   33.53    0.91 
  -5  -6   1    4.57    0.36 
   5  -6  -1    4.59    0.32 
  -5  -6   1    4.40    0.34 
   5   6  -1    4.76    0.19 
  -4  -6   1    2.82    0.32 
   4  -6  -1    2.63    0.27 
  -4  -6   1    2.79    0.30 
   4   6  -1    2.95    0.19 
   3  -6  -1    3.31    0.28 
   3  -6  -1    3.20    0.27 
  -3  -6   1    2.69    0.31 
   3  -6  -1    2.95    0.26 
  -3  -6   1    3.10    0.27 
   3   6  -1    3.08    0.22 
  -2  -6   1    1.31    0.24 
   2  -6  -1    1.35    0.23 
  -2  -6   1    1.14    0.28 
   2  -6  -1    1.13    0.24 
   2  -6  -1    1.69    0.23 
   2   6  -1    0.81    0.15 
  -1  -6   1    0.31    0.26 
   1  -6  -1    0.63    0.21 
  -1  -6   1    0.60    0.23 
   1  -6  -1    0.43    0.24 
   1  -6  -1    0.60    0.20 
  -1  -6   1    0.68    0.17 
   0  -6  -1    0.83    0.19 
   0  -6   1    0.46    0.23 
   0  -6   1    0.64    0.18 
   0  -6   1    0.32    0.25 
   0  -6  -1    0.82    0.20 
   0  -6  -1    0.83    0.24 
  -1  -6  -1    9.53    0.37 
   1  -6   1    9.13    0.39 
  -1  -6  -1    9.66    0.43 
   1  -6   1    9.29    0.41 
   1  -6   1    9.22    0.43 
   1   6   1    9.20    0.35 
  -2  -6  -1    5.55    0.31 
   2  -6   1    5.71    0.41 
  -2  -6  -1    6.06    0.40 
   2  -6   1    5.58    0.35 
   2  -6   1    6.10    0.35 
   2   6   1    5.79    0.31 
   3  -6   1   11.29    0.45 
  -3  -6  -1   11.83    0.41 
   3  -6   1   11.57    0.44 
  -3  -6  -1   11.71    0.50 
   3   6   1   11.61    0.36 
  -4  -6  -1   30.84    0.83 
   4  -6   1   31.63    0.76 
  -4  -6  -1   31.31    0.80 
   4  -6   1   30.64    0.82 
   4   6   1   31.56    0.66 
   5  -6   1    4.44    0.36 
  -5  -6  -1    4.09    0.30 
  -5  -6  -1    3.66    0.35 
   5  -6   1    3.80    0.29 
   5   6   1    4.00    0.25 
   6  -6   1    2.62    0.30 
  -6  -6  -1    2.39    0.31 
  -6  -6  -1    2.27    0.35 
   6   6   1    2.63    0.16 
   7  -6   1    0.93    0.26 
  -7  -6  -1    1.01    0.31 
  -7  -6  -1    0.99    0.33 
   7   6   1    1.06    0.15 
  -8  -6  -1    8.04    0.51 
   8  -6   1    9.08    0.54 
  -8  -6  -1    7.83    0.54 
  -9  -6  -1   12.10    0.62 
   9  -6   1   12.82    0.61 
  -9  -6  -1   12.06    0.63 
  10  -6   1    0.04    0.31 
 -10  -6  -1    0.46    0.41 
 -10  -6  -1    0.18    0.46 
 -11  -6  -1    2.78    0.46 
  11  -6   1    2.18    0.40 
 -11  -6  -1    2.05    0.55 
 -12  -6  -1    1.15    0.47 
  12  -6   1    0.94    0.38 
 -12  -6  -1    0.00    0.56 
 -13  -6  -1    0.37    0.49 
 -13  -6  -1   -0.69    0.58 
  13  -6   1    0.67    0.44 
  14  -6   1    3.16    0.50 
 -14  -6  -1    2.88    0.54 
 -14  -6  -1    1.42    0.64 
 -15  -6  -1    0.33    0.57 
  15  -6   1    0.72    0.50 
 -15   6  -1   -0.82    0.63 
  16  -6   1    0.44    0.53 
 -16  -6  -1    1.50    0.59 
  15  -7  -1    2.02    0.56 
 -15  -7   1    0.48    0.76 
 -15  -7   1    2.72    0.64 
 -15   7   1    2.22    0.72 
 -14  -7   1   -0.01    0.58 
 -14  -7   1   -0.32    0.72 
  14  -7  -1    0.80    0.51 
 -14   7   1    0.79    0.64 
 -13  -7   1    1.03    0.53 
  13  -7  -1    0.75    0.48 
 -13  -7   1    0.58    0.70 
  12  -7  -1    0.87    0.41 
 -12  -7   1    0.82    0.50 
 -12  -7   1    0.50    0.60 
  11  -7  -1    1.45    0.43 
 -11  -7   1    1.23    0.60 
 -11  -7   1    1.78    0.48 
  10  -7  -1    3.99    0.44 
 -10  -7   1    3.93    0.49 
 -10  -7   1    5.05    0.60 
  -9  -7   1    2.40    0.50 
  -9  -7   1    2.23    0.44 
   9  -7  -1    2.38    0.40 
  -8  -7   1    3.81    0.45 
   8  -7  -1    5.21    0.42 
  -8  -7   1    5.12    0.48 
  -7  -7   1    0.27    0.34 
  -7  -7   1   -0.60    0.36 
   7  -7  -1    0.32    0.33 
  -6  -7   1   11.46    0.53 
  -6  -7   1   11.70    0.60 
   6  -7  -1   11.70    0.54 
  -5  -7   1   19.30    0.70 
   5  -7  -1   20.25    0.67 
  -5  -7   1   18.37    0.62 
  -4  -7   1    3.08    0.33 
  -4  -7   1    2.22    0.37 
   4  -7  -1    3.80    0.34 
   4  -7  -1    2.87    0.31 
   4   7  -1    2.85    0.16 
   3  -7  -1    1.02    0.27 
   3  -7  -1    1.59    0.30 
  -3  -7   1    1.32    0.28 
   3  -7  -1    1.40    0.30 
  -3  -7   1    0.94    0.34 
   3   7  -1    1.59    0.16 
   2  -7  -1   -0.10    0.29 
  -2  -7   1    0.30    0.28 
  -2  -7   1   -0.03    0.28 
   2  -7  -1   -0.17    0.27 
   2  -7  -1   -0.05    0.25 
   2   7  -1   -0.32    0.16 
   1  -7  -1   22.40    0.67 
  -1  -7   1   23.72    0.59 
  -1  -7   1   21.95    0.67 
   1  -7  -1   22.26    0.65 
  -1  -7   1   22.89    0.71 
   1  -7  -1   21.96    0.64 
   0  -7  -1    1.24    0.30 
   0  -7   1    1.59    0.23 
   0  -7   1    1.47    0.32 
   0  -7   1    1.14    0.28 
   0  -7  -1    1.88    0.24 
   0  -7  -1    1.81    0.27 
   1  -7   1   20.82    0.60 
   1  -7   1   19.87    0.65 
  -1  -7  -1   20.03    0.60 
   1  -7   1   20.57    0.63 
  -1  -7  -1   20.38    0.66 
   1   7   1   20.69    0.55 
  -2  -7  -1    1.74    0.32 
   2  -7   1    1.73    0.25 
   2  -7   1    2.00    0.32 
   2  -7   1    2.24    0.31 
  -2  -7  -1    2.01    0.27 
   2   7   1    2.04    0.19 
   3  -7   1    3.20    0.30 
  -3  -7  -1    2.93    0.36 
   3  -7   1    2.74    0.33 
  -3  -7  -1    3.46    0.29 
   3   7   1    3.40    0.20 
   4  -7   1   -0.01    0.32 
  -4  -7  -1   -0.23    0.33 
   4  -7   1    0.31    0.26 
  -4  -7  -1   -0.15    0.25 
   4   7   1   -0.03    0.16 
  -5  -7  -1    8.21    0.44 
   5  -7   1    8.79    0.49 
  -5  -7  -1    8.85    0.56 
   5  -7   1    9.78    0.52 
   5   7   1    9.39    0.34 
  -6  -7  -1    0.02    0.36 
   6  -7   1   -0.27    0.29 
  -6  -7  -1    0.12    0.31 
  -7  -7  -1    4.86    0.42 
   7  -7   1    5.85    0.36 
  -7  -7  -1    5.13    0.44 
   8  -7   1    0.33    0.30 
  -8  -7  -1    0.51    0.40 
  -8  -7  -1   -0.27    0.35 
   9  -7   1    5.58    0.43 
  -9  -7  -1    5.79    0.50 
  -9  -7  -1    5.07    0.48 
 -10  -7  -1   -0.29    0.44 
  10  -7   1    0.36    0.39 
 -10  -7  -1   -0.04    0.47 
 -11  -7  -1    3.32    0.57 
  11  -7   1    3.52    0.41 
 -11  -7  -1    3.04    0.49 
  12  -7   1    0.48    0.40 
 -12  -7  -1   -0.17    0.58 
 -12  -7  -1    0.40    0.49 
 -13  -7  -1    0.89    0.54 
  13  -7   1    0.37    0.46 
 -14  -7  -1    0.28    0.56 
  14  -7   1    0.34    0.50 
 -15  -7  -1    0.80    0.59 
  15  -7   1   -0.11    0.54 
 -15   7  -1    1.66    0.70 
 -14  -8   1    0.38    0.59 
  14  -8  -1   -0.13    0.55 
 -14   8   1    0.03    0.68 
  13  -8  -1    1.02    0.47 
 -13  -8   1    0.76    0.58 
 -13  -8   1   -1.25    0.70 
  12  -8  -1    0.88    0.50 
 -12  -8   1    0.41    0.54 
 -12  -8   1   -1.00    0.65 
 -11  -8   1   -0.29    0.50 
 -11  -8   1   -0.56    0.60 
  11  -8  -1   -0.44    0.45 
 -10  -8   1    1.37    0.50 
 -10  -8   1    1.12    0.55 
  10  -8  -1    1.80    0.46 
  -9  -8   1    0.17    0.48 
  -9  -8   1    0.66    0.48 
   9  -8  -1    0.78    0.43 
  -8  -8   1    0.11    0.45 
  -8  -8   1   -0.47    0.42 
   8  -8  -1   -0.16    0.40 
   7  -8  -1    0.89    0.38 
  -7  -8   1    1.12    0.44 
  -7  -8   1    1.07    0.40 
  -6  -8   1    3.68    0.46 
  -6  -8   1    3.80    0.41 
   6  -8  -1    3.60    0.41 
  -5  -8   1   27.49    0.91 
  -5  -8   1   26.66    0.80 
   5  -8  -1   29.00    0.84 
  -4  -8   1    8.41    0.49 
  -4  -8   1    9.33    0.61 
   4  -8  -1    9.47    0.51 
   4  -8  -1    8.92    0.59 
   3  -8  -1    2.97    0.37 
  -3  -8   1    2.27    0.35 
   3  -8  -1    2.49    0.36 
   3  -8  -1    2.11    0.34 
  -3  -8   1    2.45    0.40 
   3   8  -1    2.09    0.20 
  -2  -8   1   16.18    0.60 
  -2  -8   1   17.04    0.68 
   2  -8  -1   16.02    0.61 
   2  -8  -1   17.09    0.61 
   2  -8  -1   16.54    0.56 
   2   8  -1   16.83    0.48 
   1  -8  -1    3.90    0.35 
  -1  -8   1    3.75    0.27 
  -1  -8   1    3.99    0.36 
   1  -8  -1    3.55    0.32 
   1  -8  -1    3.40    0.38 
  -1  -8   1    3.74    0.41 
   1   8  -1    3.62    0.25 
   0  -8  -1   -0.06    0.27 
   0  -8   1   -0.10    0.35 
   0  -8   1    0.06    0.27 
   0  -8   1   -0.10    0.31 
   0  -8  -1    0.31    0.36 
   0  -8  -1    0.04    0.28 
   0   8   1   -0.20    0.24 
   1  -8   1    2.03    0.34 
   1  -8   1    2.27    0.30 
   1  -8   1    2.15    0.40 
  -1  -8  -1    2.14    0.38 
  -1  -8  -1    1.75    0.31 
   1   8   1    2.23    0.24 
   2  -8   1    5.63    0.47 
   2  -8   1    5.93    0.35 
   2  -8   1    5.61    0.42 
  -2  -8  -1    5.31    0.42 
  -2  -8  -1    5.67    0.43 
   2   8   1    5.59    0.39 
   3  -8   1    1.62    0.36 
  -3  -8  -1    1.60    0.31 
  -3  -8  -1    1.56    0.39 
   3  -8   1    1.36    0.31 
   3   8   1    1.57    0.21 
   4  -8   1    1.11    0.32 
   4  -8   1    1.41    0.39 
  -4  -8  -1    0.80    0.39 
  -4  -8  -1    1.18    0.33 
   4   8   1    0.94    0.20 
   5  -8   1    1.44    0.40 
   5  -8   1    0.62    0.33 
  -5  -8  -1    0.55    0.41 
  -5  -8  -1    0.63    0.33 
  -6  -8  -1   10.36    0.66 
   6  -8   1   11.35    0.64 
  -6  -8  -1   10.76    0.52 
  -7  -8  -1    0.89    0.44 
  -7  -8  -1    1.20    0.38 
   7  -8   1    1.51    0.38 
   8  -8   1    2.62    0.41 
  -8  -8  -1    2.98    0.43 
  -8  -8  -1    2.98    0.49 
  -9  -8  -1    4.52    0.47 
  -9  -8  -1    3.07    0.51 
   9  -8   1    3.68    0.46 
 -10  -8  -1    0.87    0.50 
  10  -8   1    0.74    0.43 
 -10  -8  -1    0.72    0.47 
 -11  -8  -1    0.48    0.53 
  11  -8   1   -0.04    0.46 
  12  -8   1    0.19    0.44 
 -12  -8  -1   -0.07    0.55 
 -13  -8  -1    1.15    0.59 
  13  -8   1    0.79    0.51 
  14  -8   1    0.20    0.53 
 -14  -8  -1    0.67    0.65 
 -13  -9   1    0.39    0.63 
  13  -9  -1    1.48    0.57 
  12  -9  -1   -0.03    0.49 
 -12  -9   1    0.42    0.59 
  11  -9  -1    1.15    0.48 
 -11  -9   1    0.66    0.58 
 -11  -9   1   -0.01    0.59 
 -10  -9   1    2.60    0.58 
  10  -9  -1    2.85    0.53 
 -10  -9   1    3.65    0.59 
  -9  -9   1    0.24    0.51 
   9  -9  -1    0.50    0.48 
  -9  -9   1   -0.11    0.52 
  -8  -9   1    0.74    0.51 
  -8  -9   1    0.31    0.46 
   8  -9  -1    0.68    0.44 
  -7  -9   1    6.17    0.57 
   7  -9  -1    6.23    0.50 
  -7  -9   1    6.20    0.51 
  -6  -9   1    8.03    0.58 
  -6  -9   1    7.80    0.54 
   6  -9  -1    8.24    0.52 
   5  -9  -1   -0.07    0.39 
  -5  -9   1   -0.22    0.40 
  -5  -9   1    0.07    0.39 
  -4  -9   1    0.92    0.45 
  -4  -9   1    1.03    0.39 
   4  -9  -1    1.91    0.40 
   4  -9  -1    1.47    0.39 
   3  -9  -1    0.84    0.37 
  -3  -9   1    0.69    0.40 
  -3  -9   1    0.97    0.38 
   3  -9  -1    1.31    0.41 
   3  -9  -1    0.69    0.38 
  -2  -9   1   -0.47    0.36 
   2  -9  -1    0.14    0.36 
  -2  -9   1    0.08    0.43 
   2  -9  -1   -0.76    0.35 
   2  -9  -1   -0.06    0.38 
   2   9  -1    0.35    0.22 
   1  -9  -1    1.01    0.32 
  -1  -9   1    1.35    0.36 
   1  -9  -1    1.15    0.40 
  -1  -9   1    0.62    0.43 
   1  -9  -1    1.07    0.36 
   1   9  -1    0.78    0.26 
   0  -9  -1    4.19    0.45 
   0  -9   1    4.75    0.35 
   0  -9   1    4.87    0.49 
   0  -9  -1    4.72    0.40 
   0  -9   1    4.59    0.44 
   0   9   1    4.55    0.34 
  -1  -9  -1   -0.47    0.35 
   1  -9   1    0.31    0.43 
   1  -9   1   -0.33    0.32 
   1  -9   1    0.21    0.39 
  -1  -9  -1    0.20    0.40 
   1   9   1    0.40    0.26 
   2  -9   1   -0.48    0.31 
  -2  -9  -1   -0.08    0.41 
   2  -9   1    0.47    0.42 
   2  -9   1   -0.18    0.37 
  -2  -9  -1   -0.18    0.35 
   2   9   1   -0.15    0.25 
   3  -9   1    2.25    0.39 
  -3  -9  -1    2.29    0.38 
  -3  -9  -1    2.55    0.46 
   3  -9   1    2.69    0.44 
   3   9   1    2.01    0.24 
  -4  -9  -1    2.36    0.38 
   4  -9   1    2.38    0.38 
   4  -9   1    2.57    0.44 
  -4  -9  -1    1.60    0.47 
   5  -9   1    0.55    0.44 
  -5  -9  -1    0.31    0.34 
  -5  -9  -1   -0.14    0.45 
   5  -9   1   -0.07    0.37 
  -6  -9  -1    1.19    0.36 
   6  -9   1    1.30    0.41 
  -6  -9  -1    1.73    0.48 
  -7  -9  -1    1.37    0.50 
   7  -9   1    1.62    0.43 
  -7  -9  -1    2.11    0.41 
  -8  -9  -1    0.11    0.50 
  -8  -9  -1    0.27    0.41 
   8  -9   1    0.42    0.44 
   9  -9   1    0.04    0.46 
  -9  -9  -1    0.52    0.52 
  10  -9   1    3.46    0.48 
 -10  -9  -1    4.01    0.59 
  11  -9   1    0.61    0.51 
 -11  -9  -1    0.32    0.57 
 -12  -9  -1    0.98    0.61 
  12  -9   1    0.54    0.53 
 -13  -9  -1    0.18    0.62 
  13  -9   1    0.43    0.56 
 -11 -10   1   -0.74    0.60 
  11 -10  -1   -0.22    0.55 
  10 -10  -1   -0.16    0.54 
 -10 -10   1    0.42    0.64 
  -9 -10   1    0.49    0.52 
  -9 -10   1   -0.15    0.58 
   9 -10  -1    0.08    0.52 
  -8 -10   1    2.14    0.54 
   8 -10  -1    2.64    0.53 
  -8 -10   1    2.48    0.58 
  -7 -10   1    1.00    0.46 
  -7 -10   1    0.63    0.54 
   7 -10  -1    0.45    0.48 
   6 -10  -1    0.45    0.46 
  -6 -10   1   -0.13    0.47 
  -6 -10   1   -0.16    0.46 
  -5 -10   1    5.35    0.50 
  -5 -10   1    5.24    0.59 
   5 -10  -1    6.21    0.51 
  -4 -10   1    0.64    0.52 
  -4 -10   1    0.39    0.40 
   4 -10  -1    0.86    0.46 
  -3 -10   1    3.10    0.43 
   3 -10  -1    2.75    0.44 
   3 -10  -1    3.85    0.49 
  -3 -10   1    2.81    0.53 
   3 -10  -1    2.45    0.43 
   2 -10  -1    1.91    0.48 
  -2 -10   1    1.50    0.51 
  -2 -10   1    1.26    0.43 
   2 -10  -1    1.66    0.43 
   2 -10  -1    1.88    0.40 
  -1 -10   1    6.53    0.55 
   1 -10  -1    9.30    0.62 
   1 -10  -1    6.47    0.53 
   1 -10  -1    6.05    0.51 
  -1 -10   1    5.59    0.56 
  -1  10   1    6.56    0.43 
   0 -10   1    0.70    0.35 
   0 -10  -1    0.67    0.49 
   0 -10   1    0.77    0.51 
   0 -10   1    0.74    0.41 
   0 -10  -1    0.20    0.39 
   0  10  -1    0.50    0.31 
   0  10   1    0.11    0.32 
   1 -10   1    1.06    0.45 
  -1 -10  -1    0.69    0.48 
   1 -10   1    0.63    0.37 
  -1 -10  -1    0.82    0.39 
   1 -10   1    1.07    0.47 
   1  10   1    0.36    0.30 
  -2 -10  -1    0.39    0.38 
   2 -10   1    0.88    0.45 
  -2 -10  -1    0.66    0.48 
   2 -10   1    1.46    0.46 
   2 -10   1    0.86    0.37 
   3 -10   1    5.33    0.52 
  -3 -10  -1    5.48    0.45 
   3 -10   1    5.90    0.48 
  -3 -10  -1    5.73    0.57 
   4 -10   1    2.47    0.47 
   4 -10   1    2.56    0.43 
  -4 -10  -1    1.97    0.42 
  -4 -10  -1    1.99    0.51 
   5 -10   1    0.78    0.51 
   5 -10   1   -0.22    0.42 
  -5 -10  -1    0.25    0.38 
  -5 -10  -1    0.11    0.52 
   6 -10   1    1.06    0.45 
  -6 -10  -1    1.14    0.54 
  -7 -10  -1    0.17    0.55 
   7 -10   1    0.50    0.47 
  -8 -10  -1    0.08    0.50 
   8 -10   1    0.43    0.48 
  -9 -10  -1    0.25    0.58 
   9 -10   1    0.68    0.52 
 -10 -10  -1   -0.59    0.59 
  10 -10   1    0.30    0.54 
 -11 -10  -1   -0.43    0.61 
  11 -10   1    0.65    0.57 
 -10 -11   1    0.93    0.67 
  10 -11  -1   -0.41    0.60 
  -9 -11   1    1.60    0.64 
   9 -11  -1    1.96    0.59 
  -8 -11   1   -0.31    0.60 
   8 -11  -1    0.68    0.55 
   7 -11  -1    0.38    0.53 
  -7 -11   1    0.30    0.61 
   6 -11  -1    2.76    0.54 
  -6 -11   1    2.76    0.63 
  -6 -11   1    2.84    0.51 
  -5 -11   1    0.61    0.47 
   5 -11  -1   -0.10    0.49 
  -5 -11   1   -0.28    0.58 
  -4 -11   1    0.09    0.46 
   4 -11  -1    0.08    0.47 
  -4 -11   1   -0.05    0.58 
   3 -11  -1    1.13    0.47 
   3 -11  -1    1.99    0.52 
   3 -11  -1    1.44    0.46 
  -3 -11   1    0.30    0.47 
  -3 -11   1    1.18    0.58 
  -2 -11   1   -0.60    0.46 
   2 -11  -1    0.34    0.47 
   2 -11  -1    0.66    0.50 
  -2 -11   1    0.36    0.55 
   2 -11  -1    0.89    0.45 
  -2  11   1   -0.88    0.38 
  -1 -11   1   -0.28    0.47 
   1 -11  -1    0.31    0.52 
   1 -11  -1   -0.43    0.44 
  -1 -11   1    0.64    0.56 
  -1  11   1   -0.28    0.39 
   0 -11   1   -0.51    0.46 
   0 -11   1    0.22    0.53 
   0 -11  -1   -0.02    0.52 
   0 -11  -1    0.15    0.43 
   0  11   1   -0.02    0.35 
   1 -11   1    0.17    0.49 
   1 -11   1    2.06    0.43 
  -1 -11  -1    1.28    0.44 
   1 -11   1    1.70    0.57 
  -1 -11  -1    1.97    0.54 
  -1  11  -1    0.80    0.38 
   2 -11   1   -0.41    0.49 
  -2 -11  -1   -0.02    0.42 
   2 -11   1    0.07    0.43 
  -2 -11  -1   -0.34    0.55 
   3 -11   1   -0.07    0.47 
  -3 -11  -1    0.47    0.45 
  -3 -11  -1    0.16    0.55 
   3 -11   1    0.00    0.47 
   4 -11   1    2.48    0.53 
   4 -11   1    0.94    0.46 
  -4 -11  -1    1.46    0.57 
  -5 -11  -1    0.02    0.59 
   5 -11   1    0.54    0.49 
   6 -11   1   -0.15    0.54 
  -6 -11  -1   -0.06    0.59 
  -7 -11  -1   -0.40    0.61 
   7 -11   1    0.10    0.52 
  -8 -11  -1    0.01    0.62 
   8 -11   1   -0.01    0.56 
   9 -11   1    0.00    0.56 
  -9 -11  -1   -0.87    0.64 
 -10 -11  -1    0.61    0.71 
  10 -11   1    0.33    0.59 
  -7 -12   1    0.39    0.67 
   7 -12  -1    0.19    0.63 
   6 -12  -1    0.25    0.61 
  -6 -12   1    0.63    0.67 
  -5 -12   1   -0.36    0.65 
   5 -12  -1   -0.03    0.58 
   4 -12  -1    1.61    0.53 
  -4 -12   1    0.27    0.69 
  -3 -12   1   -0.37    0.51 
   3 -12  -1    0.75    0.52 
  -3 -12   1    0.07    0.63 
  -3  12   1   -0.94    0.44 
  -2 -12   1    0.73    0.52 
   2 -12  -1    1.72    0.60 
   2 -12  -1    1.26    0.53 
  -2 -12   1    1.10    0.63 
  -2  12   1    0.06    0.46 
   1 -12  -1    0.36    0.49 
   1 -12  -1    0.66    0.58 
  -1 -12   1    0.38    0.62 
  -1 -12   1    0.17    0.52 
   0 -12   1    1.11    0.54 
   0 -12   1    1.67    0.62 
   0 -12  -1    0.77    0.49 
   0 -12  -1    1.52    0.64 
  -1 -12  -1    0.32    0.59 
   1 -12   1    0.10    0.53 
   1 -12   1    1.28    0.63 
   2 -12   1    0.98    0.52 
  -2 -12  -1    0.60    0.62 
   3 -12   1    0.18    0.56 
  -3 -12  -1   -0.56    0.62 
   3 -12   1    0.42    0.51 
  -4 -12  -1   -0.26    0.64 
   4 -12   1   -0.40    0.55 
   4 -12   1   -0.54    0.49 
   5 -12   1    0.41    0.57 
  -5 -12  -1   -0.20    0.64 
  -6 -12  -1    0.05    0.66 
   6 -12   1    0.43    0.56 
  -7 -12  -1    0.56    0.67 
   7 -12   1    0.10    0.59 
  -3 -13   1    0.45    0.72 
  -2 -13   1    0.38    0.73 
  -1 -13   1    0.28    0.68 
   1 -13  -1    0.40    0.64 
   0 -13   1    1.18    0.58 
   0 -13  -1    0.13    0.64 
   0 -13   1    2.33    0.71 
  -1 -13  -1   -0.12    0.67 
   1 -13   1    0.37    0.58 
  -2 -13  -1    1.47    0.69 
   2 -13   1    0.82    0.61 
   3 -13   1    0.24    0.58 
  -3 -13  -1    0.17    0.70 
 -17   0   2    0.37    0.58 
  16   0  -2    2.75    0.43 
 -16   0   2    1.90    0.57 
 -15   0   2   -0.04    0.51 
  15   0  -2    0.15    0.37 
  14   0  -2    3.11    0.35 
 -14   0   2    2.61    0.51 
 -13   0   2   -0.27    0.43 
  13   0  -2   -0.23    0.31 
  12   0  -2    1.27    0.29 
 -12   0   2    1.02    0.27 
 -12   0   2    1.74    0.42 
 -11   0   2    0.32    0.24 
  11   0  -2    0.26    0.25 
 -11   0   2    0.32    0.33 
 -10   0   2    1.17    0.34 
  10   0  -2    1.37    0.23 
 -10   0   2    0.86    0.22 
  -9   0   2    0.07    0.29 
   9   0  -2    0.13    0.18 
  -9   0   2    0.04    0.18 
   8   0  -2    0.26    0.17 
  -8   0   2    0.66    0.25 
  -7   0   2    0.02    0.13 
  -7   0   2    0.10    0.21 
   7   0  -2    0.05    0.13 
  -6   0   2    0.17    0.11 
  -6   0   2    0.28    0.19 
   6   0  -2    0.30    0.12 
  -5   0   2    0.02    0.09 
  -5   0   2    0.23    0.16 
   5   0  -2   -0.04    0.10 
   4   0  -2  273.64    5.16 
  -4   0   2  271.28    6.03 
  -4   0   2  275.29    5.62 
  -3   0   2    0.11    0.06 
  -3   0   2   -0.06    0.11 
   3   0  -2    0.05    0.06 
  -2   0   2  114.64    2.56 
  -2   0   2  115.53    2.37 
   2   0  -2  115.24    2.18 
  -1   0   2   -0.02    0.04 
  -1   0   2   -0.02    0.06 
   0   0   2   37.36    0.73 
   0   0   2   38.83    0.85 
   1   0   2   -0.44    0.07 
   1   0   2   -0.35    0.07 
   2   0   2  304.24    5.75 
   3   0   2   -0.09    0.07 
  -4   0  -2   57.75    1.22 
   4   0   2   57.31    1.12 
   5   0   2    0.12    0.10 
  -5   0  -2   -0.09    0.12 
  -6   0  -2   52.73    1.15 
   6   0   2   53.02    1.06 
  -7   0  -2    0.15    0.18 
  -7   0  -2    0.16    0.16 
   7   0   2   -0.02    0.14 
   8   0   2    6.83    0.32 
  -8   0  -2    7.22    0.35 
  -8   0  -2    7.10    0.39 
  -9   0  -2    0.08    0.21 
   9   0   2   -0.01    0.19 
  -9   0  -2    0.31    0.25 
 -10   0  -2   10.76    0.46 
 -10   0  -2   11.90    0.52 
  10   0   2   11.77    0.44 
  11   0   2    0.44    0.25 
 -11   0  -2    0.18    0.32 
 -11   0  -2   -0.21    0.28 
  12   0   2    9.26    0.51 
 -12   0  -2    8.23    0.56 
 -12   0  -2    8.96    0.51 
 -13   0  -2    0.09    0.31 
  13   0   2   -0.47    0.31 
 -13   0  -2    0.25    0.40 
 -14   0  -2    0.04    0.37 
 -14   0  -2    0.61    0.44 
  14   0   2    0.15    0.35 
 -15   0  -2   -0.04    0.48 
  15   0   2   -0.05    0.38 
 -16   0  -2    6.44    0.61 
  16   0   2    6.26    0.46 
  17   0   2    0.10    0.42 
 -17   0  -2    1.07    0.60 
  17  -1  -2    1.27    0.48 
 -17  -1   2    2.23    0.58 
 -17   1   2    2.03    0.62 
 -16  -1   2    1.99    0.56 
  16  -1  -2    1.19    0.44 
 -16   1   2    1.05    0.59 
  15  -1  -2    0.07    0.39 
 -15  -1   2    0.82    0.51 
 -15   1   2   -0.02    0.51 
  15   1  -2    0.36    0.35 
 -14  -1   2    1.07    0.49 
  14  -1  -2    0.70    0.34 
  14   1  -2    0.74    0.32 
 -14   1   2    0.86    0.49 
 -13  -1   2   -0.02    0.32 
 -13  -1   2    0.38    0.45 
  13  -1  -2    0.14    0.33 
  13   1  -2   -0.25    0.30 
 -13   1   2    0.03    0.43 
  12  -1  -2   24.77    0.70 
 -12  -1   2   24.07    0.88 
 -12  -1   2   24.52    0.70 
  12   1  -2   25.62    0.69 
 -12   1   2   23.76    0.85 
 -11  -1   2   29.43    0.77 
 -11  -1   2   30.14    0.95 
  11  -1  -2   29.49    0.75 
 -11   1   2   29.48    0.91 
  11   1  -2   29.05    0.73 
 -11   1   2   30.93    0.74 
 -10  -1   2    1.01    0.36 
  10  -1  -2   -0.03    0.23 
 -10  -1   2   -0.29    0.23 
 -10   1   2   -0.02    0.18 
 -10   1   2    0.45    0.32 
  10   1  -2   -0.08    0.20 
   9  -1  -2    6.88    0.37 
  -9  -1   2    6.30    0.39 
  -9  -1   2    7.78    0.51 
  -9   1   2    7.28    0.46 
  -9   1   2    6.98    0.30 
   9   1  -2    7.11    0.33 
   8  -1  -2   22.60    0.57 
  -8  -1   2   24.21    0.73 
  -8  -1   2   22.60    0.60 
  -8   1   2   22.82    0.54 
   8   1  -2   22.68    0.54 
  -8   1   2   22.94    0.68 
  -7  -1   2   67.83    1.61 
  -7  -1   2   66.43    1.45 
   7  -1  -2   67.67    1.35 
   7   1  -2   66.74    1.32 
  -7   1   2   67.25    1.57 
  -7   1   2   67.74    1.41 
  -6  -1   2  182.18    3.66 
   6  -1  -2  176.34    3.37 
  -6  -1   2  175.50    3.95 
  -6   1   2  168.65    3.93 
  -6   1   2  175.94    3.63 
   6   1  -2  179.55    3.35 
  -5  -1   2   78.69    1.84 
   5  -1  -2   81.08    1.56 
  -5  -1   2   81.82    1.69 
  -5   1   2   80.16    1.66 
   5   1  -2   79.03    1.54 
  -5   1   2   79.89    1.82 
  -4  -1   2  109.51    2.51 
  -4  -1   2  113.43    2.32 
   4  -1  -2  111.20    2.13 
   4   1  -2  112.27    2.11 
  -4   1   2  109.93    2.48 
   3  -1  -2    4.56    0.18 
  -3  -1   2    5.17    0.18 
  -3  -1   2    4.82    0.24 
  -3   1   2    4.59    0.19 
   3   1  -2    5.04    0.14 
  -2  -1   2   29.27    0.63 
  -2  -1   2   28.81    0.68 
  -2  -1   2   29.17    0.55 
   2  -1  -2   27.78    0.58 
  -2   1   2   28.38    0.66 
  -1  -1   2   46.04    1.02 
  -1  -1   2   45.12    0.96 
  -1  -1   2   43.65    0.85 
   1  -1  -2   45.11    0.94 
  -1   1   2   44.65    1.00 
   0  -1   2    0.09    0.04 
   0  -1   2    0.04    0.06 
   0  -1  -2    0.01    0.05 
   0   1   2    0.12    0.03 
   0   1   2   -0.03    0.05 
   1  -1   2   82.86    1.82 
  -1  -1  -2   83.01    1.71 
   1  -1   2   81.11    1.56 
   1   1   2   81.80    1.56 
  -2  -1  -2   49.46    1.10 
   2  -1   2   50.71    1.12 
   2  -1   2   48.66    0.96 
   2   1   2   49.37    0.95 
   3  -1   2  134.23    2.55 
  -3  -1  -2  134.92    2.97 
  -3  -1  -2  134.23    2.79 
   3   1   2  134.09    2.55 
  -4  -1  -2   26.25    0.61 
   4  -1   2   26.86    0.55 
  -4  -1  -2   26.91    0.64 
   4   1   2   26.40    0.54 
  -5  -1  -2    4.26    0.25 
   5  -1   2    3.98    0.19 
  -5  -1  -2    4.14    0.23 
   5   1   2    3.83    0.19 
  -6  -1  -2   49.32    1.09 
  -6  -1  -2   48.79    1.16 
   6  -1   2   50.05    1.01 
   6   1   2   49.73    0.99 
  -7  -1  -2    8.45    0.39 
   7  -1   2    8.37    0.33 
  -7  -1  -2    8.62    0.37 
   7   1   2    7.89    0.29 
  -7   1  -2    8.03    0.35 
  -8  -1  -2   99.23    2.30 
  -8  -1  -2   98.03    2.13 
   8  -1   2  101.11    1.97 
  -8   1  -2  102.93    2.12 
   8   1   2  100.25    1.95 
  -9  -1  -2   45.59    1.16 
   9  -1   2   46.60    1.00 
  -9  -1  -2   45.49    1.06 
  -9   1  -2   46.45    1.04 
   9   1   2   46.65    0.98 
  -9   1  -2   45.72    1.15 
  10  -1   2   22.88    0.62 
 -10  -1  -2   21.78    0.72 
 -10  -1  -2   23.16    0.67 
 -10   1  -2   22.47    0.64 
  10   1   2   22.60    0.61 
 -10   1  -2   21.63    0.73 
 -11  -1  -2    5.54    0.42 
  11  -1   2    4.54    0.32 
 -11  -1  -2    4.83    0.34 
  11   1   2    5.37    0.38 
 -11   1  -2    5.70    0.40 
 -11   1  -2    5.42    0.40 
 -12  -1  -2    1.74    0.41 
  12  -1   2    0.65    0.30 
 -12  -1  -2    0.97    0.32 
  12   1   2    1.10    0.27 
 -12   1  -2    1.09    0.29 
 -12   1  -2    1.01    0.38 
 -13  -1  -2    3.30    0.48 
  13  -1   2    2.83    0.35 
 -13  -1  -2    3.00    0.38 
 -13   1  -2    3.64    0.35 
 -13   1  -2    3.47    0.44 
  13   1   2    2.71    0.32 
  14  -1   2    0.56    0.35 
 -14  -1  -2    0.04    0.40 
 -14  -1  -2    0.59    0.45 
 -14   1  -2    0.63    0.45 
  14   1   2    0.63    0.34 
 -15  -1  -2    1.97    0.51 
  15  -1   2    1.46    0.40 
  15   1   2    1.49    0.35 
 -15   1  -2    1.46    0.53 
 -16  -1  -2    2.02    0.57 
  16  -1   2   -0.23    0.43 
  16   1   2    0.10    0.40 
 -16   1  -2    0.60    0.53 
 -17  -1  -2    0.61    0.57 
  17  -1   2   -0.31    0.44 
 -17   1  -2    0.31    0.60 
 -17  -2   2    0.58    0.56 
  17  -2  -2    0.71    0.49 
 -17   2   2   -0.19    0.60 
 -16  -2   2    0.73    0.54 
  16  -2  -2   -0.23    0.45 
 -16   2   2    0.29    0.57 
  15  -2  -2    3.57    0.43 
 -15  -2   2    5.47    0.58 
 -15   2   2    3.77    0.57 
 -14  -2   2    0.91    0.50 
  14  -2  -2    0.73    0.36 
 -14   2   2    1.24    0.49 
  13  -2  -2    8.75    0.53 
 -13  -2   2   10.89    0.75 
 -13  -2   2    9.55    0.54 
  13   2  -2    7.98    0.50 
 -13   2   2    9.12    0.66 
  12  -2  -2    1.34    0.31 
 -12  -2   2    2.68    0.45 
 -12  -2   2    1.68    0.33 
  12   2  -2    2.05    0.26 
 -12   2   2    1.46    0.41 
 -11  -2   2    2.88    0.44 
 -11  -2   2    2.34    0.31 
  11  -2  -2    2.37    0.30 
  11   2  -2    2.37    0.25 
 -11   2   2    2.80    0.40 
 -10  -2   2   20.03    0.60 
 -10  -2   2   20.23    0.76 
  10  -2  -2   19.17    0.60 
 -10   2   2   19.73    0.50 
  10   2  -2   19.82    0.51 
 -10   2   2   18.44    0.71 
   9  -2  -2    8.16    0.42 
  -9  -2   2    9.28    0.57 
  -9  -2   2    8.85    0.40 
  -9   2   2    8.35    0.30 
  -9   2   2    8.90    0.50 
   9   2  -2    9.35    0.34 
  -8  -2   2    8.23    0.51 
  -8  -2   2    8.22    0.37 
   8  -2  -2    7.99    0.34 
   8   2  -2    8.60    0.29 
  -8   2   2    8.61    0.26 
  -8   2   2    8.09    0.44 
   7  -2  -2    1.64    0.19 
  -7  -2   2    1.24    0.20 
  -7  -2   2    1.24    0.28 
  -7   2   2    1.11    0.09 
   7   2  -2    1.08    0.13 
  -7   2   2    1.58    0.24 
  -6  -2   2    2.15    0.27 
  -6  -2   2    2.31    0.19 
   6  -2  -2    2.37    0.18 
  -6   2   2    2.36    0.21 
   6   2  -2    2.38    0.17 
  -5  -2   2   15.89    0.44 
   5  -2  -2   16.43    0.42 
  -5  -2   2   15.90    0.53 
   5   2  -2   16.50    0.35 
  -4  -2   2    6.56    0.27 
  -4  -2   2    6.31    0.31 
   4  -2  -2    6.38    0.26 
   4   2  -2    6.48    0.16 
  -3  -2   2   55.98    1.29 
   3  -2  -2   55.94    1.11 
  -3  -2   2   55.91    1.20 
   2  -2  -2  178.18    3.68 
   2  -2  -2  177.47    3.40 
  -2  -2   2  179.68    3.96 
  -2  -2   2  180.35    3.71 
   1  -2  -2    2.43    0.13 
  -1  -2   2    2.42    0.08 
  -1  -2   2    2.62    0.17 
   1  -2  -2    2.49    0.16 
  -1  -2   2    2.64    0.14 
   0  -2   2  227.74    4.99 
   0  -2  -2  231.71    4.96 
   0  -2   2  219.94    4.26 
   0  -2  -2  223.80    4.66 
   0   2   2  224.94    4.27 
  -1  -2  -2  578.15   12.29 
   1  -2   2  555.07   10.57 
   1  -2   2  569.73   12.35 
  -1  -2  -2  545.99   11.55 
   1   2   2  552.75   10.57 
  -2  -2  -2   15.02    0.35 
  -2  -2  -2   14.25    0.36 
   2  -2   2   14.82    0.38 
   2  -2   2   14.81    0.33 
   2   2   2   14.49    0.32 
   3  -2   2  219.82    4.86 
  -3  -2  -2  227.61    4.86 
   3  -2   2  214.94    4.17 
   3   2   2  217.98    4.16 
  -4  -2  -2  171.74    3.96 
  -4  -2  -2  178.45    3.71 
   4  -2   2  183.31    3.40 
   4   2   2  180.88    3.38 
  -5  -2  -2   11.81    0.37 
  -5  -2  -2   11.67    0.43 
   5  -2   2   11.48    0.32 
   5   2   2   11.90    0.29 
   6  -2   2    0.73    0.16 
  -6  -2  -2    0.85    0.18 
  -6  -2  -2    1.69    0.23 
   6   2   2    1.00    0.13 
  -7  -2  -2    1.11    0.20 
  -7  -2  -2    1.12    0.24 
   7  -2   2    0.93    0.18 
   7   2   2    0.96    0.15 
  -8  -2  -2    0.49    0.27 
  -8  -2  -2    0.17    0.21 
   8  -2   2    0.11    0.18 
   8   2   2    0.05    0.16 
   9  -2   2    1.96    0.25 
  -9  -2  -2    2.08    0.32 
  -9  -2  -2    2.13    0.26 
  -9   2  -2    1.92    0.22 
   9   2   2    2.03    0.19 
 -10  -2  -2    1.03    0.28 
  10  -2   2    1.39    0.26 
 -10  -2  -2    1.17    0.34 
 -10   2  -2    1.66    0.23 
  10   2   2    1.32    0.22 
  11  -2   2   10.07    0.50 
 -11  -2  -2   11.60    0.65 
 -11  -2  -2   10.41    0.51 
 -11   2  -2    9.79    0.47 
 -11   2  -2    9.79    0.59 
  11   2   2   10.41    0.45 
  12  -2   2    0.36    0.30 
 -12  -2  -2   -0.16    0.34 
 -12  -2  -2    0.77    0.43 
  12   2   2    0.34    0.26 
 -12   2  -2    0.17    0.39 
 -12   2  -2    0.33    0.28 
 -13  -2  -2    1.90    0.48 
  13  -2   2    1.50    0.35 
 -13  -2  -2    1.76    0.37 
 -13   2  -2    1.44    0.45 
  13   2   2    1.51    0.29 
 -14  -2  -2    0.97    0.47 
 -14  -2  -2    0.16    0.41 
  14  -2   2   -0.31    0.37 
  14   2   2    0.41    0.32 
 -14   2  -2    0.11    0.48 
 -15  -2  -2    2.79    0.57 
 -15  -2  -2    1.67    0.48 
  15  -2   2    1.48    0.42 
 -15   2  -2    1.89    0.51 
  15   2   2    1.46    0.36 
  16  -2   2   -0.10    0.43 
 -16  -2  -2    1.35    0.54 
 -16   2  -2    0.01    0.53 
 -17  -2  -2    3.78    0.60 
  17  -2   2    2.65    0.50 
 -17   2  -2    3.17    0.62 
  17  -3  -2   -0.39    0.51 
 -17  -3   2    1.48    0.60 
 -17   3   2   -0.26    0.61 
 -16  -3   2    2.93    0.63 
  16  -3  -2    1.92    0.48 
 -16   3   2    2.43    0.60 
 -15  -3   2    1.24    0.55 
  15  -3  -2    0.44    0.42 
 -15   3   2    0.43    0.52 
  14  -3  -2   -0.20    0.38 
 -14  -3   2    0.18    0.41 
 -14  -3   2    0.99    0.52 
 -14   3   2    0.25    0.49 
  13  -3  -2    1.23    0.36 
 -13  -3   2    3.03    0.54 
 -13  -3   2    1.43    0.42 
 -13   3   2    1.20    0.46 
  12  -3  -2    6.25    0.41 
 -12  -3   2    5.96    0.42 
 -12  -3   2    7.03    0.58 
 -12   3   2    6.48    0.50 
  11  -3  -2    0.30    0.30 
 -11  -3   2    0.41    0.32 
 -11  -3   2    1.19    0.44 
  11   3  -2    0.35    0.20 
 -11   3   2    0.58    0.38 
  10  -3  -2    1.57    0.29 
 -10  -3   2    1.89    0.31 
 -10  -3   2    2.49    0.43 
  10   3  -2    2.04    0.20 
 -10   3   2    1.70    0.36 
  -9  -3   2    0.99    0.38 
   9  -3  -2    1.40    0.26 
  -9  -3   2    1.25    0.28 
   9   3  -2    1.21    0.16 
  -9   3   2    1.55    0.31 
   8  -3  -2    6.06    0.35 
  -8  -3   2    6.26    0.43 
  -8  -3   2    6.20    0.36 
   8   3  -2    6.00    0.25 
   7  -3  -2   47.37    1.02 
  -7  -3   2   47.78    1.09 
  -7  -3   2   46.37    1.22 
   7   3  -2   46.69    0.92 
  -6  -3   2   14.35    0.44 
  -6  -3   2   13.35    0.54 
   6  -3  -2   13.76    0.41 
   6   3  -2   13.74    0.31 
  -5  -3   2  115.73    2.47 
   5  -3  -2  116.67    2.27 
  -5  -3   2  117.55    2.66 
  -4  -3   2   27.49    0.67 
   4  -3  -2   26.78    0.62 
  -4  -3   2   28.26    0.72 
   3  -3  -2    0.86    0.14 
  -3  -3   2    0.94    0.16 
  -3  -3   2    0.71    0.16 
   3  -3  -2    0.92    0.11 
  -2  -3   2   45.01    0.98 
  -2  -3   2   43.89    0.84 
   2  -3  -2   43.74    0.94 
  -2  -3   2   44.07    1.03 
   2  -3  -2   43.19    0.90 
   1  -3  -2    4.35    0.19 
  -1  -3   2    4.25    0.21 
  -1  -3   2    4.20    0.14 
  -1  -3   2    4.77    0.24 
   1  -3  -2    3.91    0.19 
   1  -3  -2    4.32    0.18 
   0  -3  -2   70.17    1.56 
   0  -3   2   69.44    1.34 
   0  -3   2   69.81    1.59 
   0  -3  -2   70.14    1.48 
   0   3   2   70.67    1.36 
  -1  -3  -2    6.09    0.25 
  -1  -3  -2    5.96    0.19 
   1  -3   2    6.24    0.25 
   1  -3   2    6.08    0.21 
   1   3   2    6.07    0.20 
  -2  -3  -2   59.31    1.29 
   2  -3   2   58.76    1.36 
  -2  -3  -2   60.99    1.33 
   2  -3   2   59.30    1.16 
   2   3   2   58.83    1.15 
  -3  -3  -2    7.94    0.25 
   3  -3   2    7.26    0.27 
  -3  -3  -2    7.14    0.31 
   3  -3   2    7.46    0.24 
   3   3   2    7.52    0.22 
   4  -3   2   81.47    1.61 
   4  -3   2   81.29    1.88 
  -4  -3  -2   85.47    1.87 
  -4  -3  -2   82.23    1.77 
   4   3   2   82.86    1.59 
   5  -3   2    0.17    0.15 
  -5  -3  -2    0.19    0.18 
  -5  -3  -2    0.00    0.20 
   5   3   2    0.12    0.10 
  -6  -3  -2   21.53    0.59 
  -6  -3  -2   20.02    0.66 
   6  -3   2   20.54    0.52 
   6   3   2   21.90    0.47 
  -7  -3  -2   54.23    1.41 
   7  -3   2   59.86    1.20 
  -7  -3  -2   56.78    1.30 
   7   3   2   59.45    1.14 
  -8  -3  -2   13.89    0.51 
  -8  -3  -2   12.51    0.60 
   8  -3   2   14.38    0.45 
   8   3   2   14.01    0.41 
  -9  -3  -2   40.58    1.01 
   9  -3   2   40.16    0.94 
  -9  -3  -2   41.20    1.12 
   9   3   2   41.40    0.87 
 -10  -3  -2   17.23    0.72 
  10  -3   2   18.50    0.60 
 -10  -3  -2   17.40    0.67 
  10   3   2   18.66    0.50 
 -10   3  -2   18.19    0.55 
  11  -3   2    4.53    0.33 
 -11  -3  -2    5.17    0.41 
 -11  -3  -2    6.49    0.49 
 -11   3  -2    5.79    0.42 
  11   3   2    5.03    0.28 
 -12  -3  -2    2.85    0.41 
  12  -3   2    2.45    0.33 
 -12  -3  -2    3.00    0.49 
  12   3   2    2.72    0.29 
 -13  -3  -2    0.21    0.38 
  13  -3   2    0.34    0.36 
 -13  -3  -2    1.36    0.50 
 -13   3  -2    0.55    0.46 
  13   3   2    0.25    0.28 
  14  -3   2    0.92    0.40 
 -14  -3  -2    1.51    0.51 
 -14  -3  -2    1.24    0.45 
 -14   3  -2    0.94    0.52 
 -15  -3  -2    0.10    0.47 
  15  -3   2   -0.05    0.41 
 -15  -3  -2    0.92    0.55 
 -15   3  -2    0.37    0.56 
  16  -3   2    0.79    0.46 
 -16  -3  -2    1.27    0.59 
 -16  -3  -2    0.80    0.51 
 -16   3  -2    0.81    0.55 
  17  -3   2    0.07    0.51 
 -17  -3  -2    0.44    0.56 
 -17   3  -2    0.00    0.58 
  17  -4  -2    0.41    0.52 
 -17  -4   2    1.67    0.63 
 -17   4   2    0.64    0.64 
 -16  -4   2    2.09    0.61 
  16  -4  -2    0.94    0.48 
 -16   4   2    1.42    0.61 
 -15  -4   2    0.81    0.49 
  15  -4  -2    0.54    0.44 
 -15  -4   2    1.47    0.58 
 -15   4   2    0.74    0.55 
  14  -4  -2   10.86    0.65 
 -14  -4   2   13.92    0.83 
 -14  -4   2   12.64    0.70 
 -14   4   2   12.71    0.77 
  13  -4  -2    0.71    0.40 
 -13  -4   2    1.35    0.43 
 -13  -4   2    2.08    0.54 
 -13   4   2    1.52    0.50 
 -12  -4   2    0.24    0.39 
  12  -4  -2    0.82    0.36 
 -12  -4   2    1.37    0.50 
 -12   4   2    0.97    0.45 
  11  -4  -2    6.38    0.41 
 -11  -4   2    7.44    0.55 
 -11  -4   2    7.98    0.58 
 -11   4   2    7.10    0.61 
 -10  -4   2   24.38    0.92 
 -10  -4   2   26.15    0.76 
  10  -4  -2   26.70    0.75 
 -10   4   2   25.99    0.83 
  -9  -4   2   10.01    0.66 
   9  -4  -2   11.54    0.52 
  -9  -4   2   10.48    0.50 
   9   4  -2   10.66    0.32 
  -8  -4   2   21.66    0.65 
  -8  -4   2   21.81    0.84 
   8  -4  -2   21.67    0.64 
   8   4  -2   22.19    0.47 
   7  -4  -2   -0.23    0.20 
  -7  -4   2   -0.11    0.25 
  -7  -4   2    0.15    0.31 
   7   4  -2    0.05    0.09 
  -6  -4   2    4.94    0.36 
  -6  -4   2    4.54    0.34 
   6  -4  -2    4.27    0.27 
   5  -4  -2    0.33    0.19 
  -5  -4   2    0.12    0.23 
  -5  -4   2   -0.07    0.19 
  -4  -4   2   36.52    0.92 
   4  -4  -2   35.76    0.81 
  -4  -4   2   36.43    0.86 
  -3  -4   2   98.73    2.09 
  -3  -4   2   96.33    2.21 
   3  -4  -2   97.42    2.05 
   3  -4  -2   97.68    1.92 
   2  -4  -2   32.77    0.75 
   2  -4  -2   33.57    0.73 
  -2  -4   2   32.39    0.78 
  -2  -4   2   33.05    0.65 
   2  -4  -2   32.34    0.78 
  -2  -4   2   32.81    0.81 
  -1  -4   2    0.42    0.16 
  -1  -4   2    0.39    0.18 
  -1  -4   2    0.33    0.09 
   1  -4  -2    0.39    0.14 
   1  -4  -2    0.42    0.14 
   1  -4  -2    0.43    0.15 
   0  -4   2   53.62    1.24 
   0  -4  -2   52.81    1.07 
   0  -4  -2   53.72    1.17 
   0  -4   2   53.29    1.05 
   0  -4   2   52.79    1.19 
   0  -4  -2   53.76    1.21 
   0   4   2   53.43    1.07 
   1  -4   2   69.70    1.54 
   1  -4   2   72.22    1.39 
  -1  -4  -2   70.06    1.53 
   1  -4   2   71.36    1.62 
  -1  -4  -2   70.71    1.59 
   1   4   2   71.07    1.38 
  -2  -4  -2  132.66    2.80 
   2  -4   2  132.78    2.55 
  -2  -4  -2  133.32    2.94 
   2  -4   2  132.20    2.97 
   2   4   2  132.70    2.53 
  -3  -4  -2    0.72    0.19 
   3  -4   2    0.80    0.20 
  -3  -4  -2    0.82    0.14 
   3  -4   2    0.89    0.15 
   3   4   2    0.76    0.12 
  -4  -4  -2    1.38    0.17 
  -4  -4  -2    1.26    0.21 
   4  -4   2    1.25    0.17 
   4  -4   2    1.18    0.22 
   4   4   2    1.25    0.12 
  -5  -4  -2    3.10    0.23 
   5  -4   2    3.41    0.28 
  -5  -4  -2    2.77    0.25 
   5  -4   2    2.84    0.21 
   5   4   2    2.90    0.15 
  -6  -4  -2    0.20    0.21 
   6  -4   2    0.02    0.20 
  -6  -4  -2    0.09    0.23 
   6   4   2    0.13    0.13 
  -7  -4  -2    1.96    0.31 
  -7  -4  -2    1.46    0.25 
   7  -4   2    2.12    0.24 
   7   4   2    1.77    0.16 
   8  -4   2    0.24    0.24 
  -8  -4  -2    0.90    0.29 
  -8  -4  -2    0.39    0.35 
   8   4   2    0.79    0.17 
  -9  -4  -2    0.63    0.31 
  -9  -4  -2    0.28    0.39 
   9  -4   2    0.90    0.28 
   9   4   2    1.41    0.19 
 -10  -4  -2   18.26    0.66 
  10  -4   2   19.32    0.64 
 -10  -4  -2   13.35    0.77 
  10   4   2   18.15    0.48 
  11  -4   2    7.31    0.53 
 -11  -4  -2    6.48    0.56 
 -11  -4  -2    6.49    0.44 
  11   4   2    6.75    0.40 
 -12  -4  -2   17.08    0.74 
  12  -4   2   15.99    0.61 
 -12  -4  -2   16.50    0.85 
  12   4   2   16.42    0.54 
 -13  -4  -2    1.65    0.54 
 -13  -4  -2    1.08    0.42 
  13  -4   2    1.98    0.40 
 -14  -4  -2    0.66    0.48 
 -14  -4  -2    1.07    0.56 
  14  -4   2    0.49    0.42 
 -14   4  -2   -0.46    0.51 
 -15  -4  -2    1.90    0.53 
  15  -4   2    1.70    0.47 
 -15  -4  -2    2.32    0.61 
 -15   4  -2    2.10    0.60 
 -16  -4  -2    1.31    0.57 
 -16  -4  -2    3.02    0.64 
  16  -4   2    0.89    0.48 
 -16   4  -2    0.87    0.67 
  17  -4   2   -0.08    0.49 
  16  -5  -2    0.04    0.51 
 -16  -5   2    1.01    0.66 
 -16   5   2   -0.34    0.61 
 -15  -5   2    1.90    0.54 
 -15  -5   2    2.75    0.69 
  15  -5  -2    1.90    0.50 
 -15   5   2    1.49    0.64 
  14  -5  -2    0.95    0.45 
 -14  -5   2    1.53    0.51 
 -14  -5   2    2.26    0.63 
 -14   5   2    1.30    0.57 
  13  -5  -2    2.10    0.44 
 -13  -5   2    1.83    0.48 
 -13  -5   2    1.68    0.63 
 -13   5   2    2.36    0.55 
  12  -5  -2    0.92    0.40 
 -12  -5   2    0.78    0.55 
 -12  -5   2    1.42    0.42 
 -12   5   2    1.82    0.49 
 -11  -5   2    5.91    0.59 
  11  -5  -2    4.28    0.39 
 -11  -5   2    5.51    0.45 
 -11   5   2    5.52    0.48 
 -10  -5   2    3.71    0.40 
  10  -5  -2    2.98    0.34 
 -10  -5   2    2.87    0.51 
  -9  -5   2    4.09    0.39 
  -9  -5   2    4.13    0.48 
   9  -5  -2    4.21    0.36 
  -8  -5   2    5.15    0.39 
  -8  -5   2    5.54    0.47 
   8  -5  -2    5.75    0.36 
  -7  -5   2    5.43    0.43 
  -7  -5   2    4.54    0.35 
   7  -5  -2    5.39    0.33 
   6  -5  -2    8.82    0.41 
  -6  -5   2    8.38    0.45 
  -6  -5   2    8.25    0.45 
  -5  -5   2    1.21    0.25 
   5  -5  -2    1.79    0.22 
  -5  -5   2    1.45    0.27 
   4  -5  -2    2.91    0.22 
  -4  -5   2    2.73    0.27 
  -4  -5   2    2.78    0.28 
   4  -5  -2    2.49    0.24 
  -3  -5   2    5.41    0.32 
   3  -5  -2    5.53    0.37 
   3  -5  -2    5.83    0.30 
  -3  -5   2    6.34    0.38 
   3   5  -2    5.69    0.19 
   2  -5  -2   16.77    0.49 
   2  -5  -2   16.60    0.48 
  -2  -5   2   17.31    0.40 
   2  -5  -2   16.91    0.48 
  -2  -5   2   16.78    0.51 
  -2  -5   2   17.78    0.51 
  -1  -5   2  164.54    3.19 
  -1  -5   2  169.87    3.75 
  -1  -5   2  168.50    3.53 
   1  -5  -2  167.34    3.23 
   1  -5  -2  169.18    3.73 
   1  -5  -2  167.29    3.51 
   0  -5  -2   11.73    0.37 
   0  -5   2   11.13    0.43 
   0  -5   2   11.27    0.33 
   0  -5  -2   11.29    0.36 
   0  -5   2   12.23    0.40 
   0  -5  -2   10.46    0.40 
   0   5   2   10.71    0.35 
   1  -5   2    0.51    0.23 
   1  -5   2    0.24    0.21 
  -1  -5  -2    0.37    0.15 
  -1  -5  -2    0.10    0.20 
   1  -5   2    0.19    0.15 
   1   5   2    0.26    0.15 
  -2  -5  -2   16.48    0.51 
   2  -5   2   16.78    0.44 
   2  -5   2   16.01    0.51 
  -2  -5  -2   16.64    0.46 
   2   5   2   16.65    0.42 
   3  -5   2  121.82    2.78 
   3  -5   2  123.75    2.39 
  -3  -5  -2  123.16    2.74 
  -3  -5  -2  122.84    2.62 
   3   5   2  122.16    2.35 
  -4  -5  -2    6.61    0.43 
   4  -5   2    6.06    0.35 
   4  -5   2    5.47    0.36 
  -4  -5  -2    6.27    0.29 
   4   5   2    6.20    0.27 
  -5  -5  -2   73.42    1.70 
   5  -5   2   72.66    1.72 
   5  -5   2   74.71    1.51 
  -5  -5  -2   74.75    1.66 
   5   5   2   74.17    1.44 
  -6  -5  -2   -0.15    0.24 
   6  -5   2    0.10    0.22 
  -6  -5  -2   -0.32    0.24 
   6   5   2    0.05    0.14 
   7  -5   2    0.10    0.24 
  -7  -5  -2    0.48    0.30 
  -7  -5  -2    0.27    0.29 
   7   5   2    0.28    0.16 
  -8  -5  -2   -0.09    0.32 
   8  -5   2    0.57    0.27 
  -8  -5  -2    0.03    0.34 
   8   5   2    0.31    0.17 
   9  -5   2    2.46    0.32 
  -9  -5  -2    3.02    0.45 
  -9  -5  -2    2.49    0.36 
   9   5   2    2.72    0.20 
 -10  -5  -2    4.99    0.42 
  10  -5   2    5.56    0.39 
 -10  -5  -2    4.97    0.53 
  10   5   2    5.88    0.34 
 -11  -5  -2   -1.01    0.48 
  11  -5   2    0.45    0.34 
 -11  -5  -2    0.14    0.39 
 -12  -5  -2   -1.08    0.52 
  12  -5   2   -0.05    0.37 
 -12  -5  -2    0.39    0.42 
  13  -5   2    2.53    0.44 
 -13  -5  -2    1.26    0.59 
 -13  -5  -2    3.12    0.48 
 -14  -5  -2   -0.16    0.48 
 -14  -5  -2   -0.20    0.63 
  14  -5   2    0.42    0.44 
 -15  -5  -2    2.34    0.66 
  15  -5   2    1.47    0.48 
 -15  -5  -2    1.45    0.55 
 -15   5  -2    1.71    0.63 
  16  -5   2    0.15    0.50 
 -16  -5  -2   -0.08    0.54 
 -16   5  -2   -0.41    0.69 
  16  -6  -2   -0.73    0.52 
 -16  -6   2    0.35    0.73 
 -16  -6   2    0.46    0.61 
 -15  -6   2    1.13    0.58 
  15  -6  -2    0.18    0.51 
 -15  -6   2    1.05    0.71 
 -15   6   2    0.27    0.66 
 -14  -6   2   -0.34    0.68 
 -14  -6   2    0.25    0.53 
  14  -6  -2    0.42    0.47 
 -14   6   2    0.54    0.61 
 -13  -6   2    0.31    0.47 
 -13  -6   2   -0.88    0.64 
  13  -6  -2    0.13    0.44 
 -13   6   2    0.56    0.56 
 -12  -6   2   -0.73    0.60 
  12  -6  -2    0.55    0.42 
 -12  -6   2    0.11    0.44 
 -12   6   2    0.16    0.50 
 -11  -6   2   -1.45    0.51 
  11  -6  -2    0.22    0.39 
 -11  -6   2    0.44    0.43 
 -10  -6   2   11.09    0.63 
  10  -6  -2   11.38    0.56 
 -10  -6   2   10.88    0.75 
  -9  -6   2   16.26    0.74 
   9  -6  -2   15.87    0.66 
  -9  -6   2   16.17    0.67 
  -8  -6   2    0.52    0.43 
  -8  -6   2    0.46    0.36 
   8  -6  -2   -0.16    0.28 
  -7  -6   2   14.50    0.60 
  -7  -6   2   14.43    0.61 
   7  -6  -2   13.88    0.54 
   6  -6  -2    6.43    0.37 
  -6  -6   2    6.37    0.50 
  -6  -6   2    6.90    0.44 
   5  -6  -2   11.71    0.53 
  -5  -6   2   11.12    0.49 
  -5  -6   2   10.95    0.50 
   4  -6  -2    2.07    0.27 
   4  -6  -2    1.73    0.24 
  -4  -6   2    1.61    0.28 
  -4  -6   2    1.82    0.30 
   4   6  -2    1.93    0.10 
  -3  -6   2   32.17    0.83 
   3  -6  -2   32.80    0.80 
   3  -6  -2   32.39    0.81 
  -3  -6   2   32.52    0.86 
   3   6  -2   31.86    0.66 
  -2  -6   2    9.15    0.31 
  -2  -6   2    8.41    0.41 
   2  -6  -2    9.00    0.37 
   2  -6  -2    8.77    0.35 
  -2  -6   2    8.99    0.46 
   2  -6  -2    8.23    0.42 
   1  -6  -2    3.07    0.28 
  -1  -6   2    3.38    0.28 
  -1  -6   2    3.45    0.20 
  -1  -6   2    3.29    0.31 
   1  -6  -2    3.45    0.26 
   1  -6  -2    3.57    0.25 
   0  -6  -2    3.41    0.25 
   0  -6   2    2.80    0.30 
   0  -6   2    3.51    0.29 
   0  -6  -2    3.51    0.23 
   0  -6  -2    3.05    0.27 
   0  -6   2    3.09    0.20 
   0   6   2    3.05    0.21 
   1  -6   2   13.46    0.43 
   1  -6   2   12.95    0.47 
  -1  -6  -2   12.38    0.48 
  -1  -6  -2   12.65    0.41 
   1  -6   2   13.28    0.50 
   1   6   2   12.65    0.42 
   2  -6   2    0.20    0.25 
  -2  -6  -2    0.12    0.25 
  -2  -6  -2    0.29    0.20 
   2  -6   2    0.29    0.19 
   2   6   2   -0.41    0.15 
  -3  -6  -2    0.39    0.28 
  -3  -6  -2    0.40    0.21 
   3  -6   2    0.04    0.20 
   3  -6   2   -0.48    0.27 
   3   6   2    0.06    0.15 
   4  -6   2    5.74    0.36 
  -4  -6  -2    5.88    0.43 
  -4  -6  -2    5.64    0.32 
   4  -6   2    5.82    0.39 
   4   6   2    6.01    0.29 
   5  -6   2   20.53    0.67 
  -5  -6  -2   22.06    0.61 
  -5  -6  -2   20.72    0.68 
   5  -6   2   22.37    0.63 
   5   6   2   22.63    0.51 
  -6  -6  -2   14.67    0.49 
  -6  -6  -2   14.73    0.63 
   6  -6   2   15.45    0.56 
   6   6   2   15.24    0.40 
   7  -6   2   13.99    0.57 
  -7  -6  -2   12.90    0.63 
  -7  -6  -2   12.77    0.50 
   7   6   2   13.11    0.39 
  -8  -6  -2    6.09    0.44 
  -8  -6  -2    5.38    0.45 
   8  -6   2    6.55    0.39 
   8   6   2    6.74    0.31 
   9  -6   2    3.09    0.36 
  -9  -6  -2    2.67    0.42 
  -9  -6  -2    2.13    0.41 
 -10  -6  -2    0.86    0.41 
 -10  -6  -2   -0.31    0.45 
  10  -6   2    0.26    0.35 
 -11  -6  -2   12.22    0.77 
  11  -6   2   13.02    0.67 
 -11  -6  -2   13.97    0.69 
  12  -6   2    4.21    0.45 
 -12  -6  -2    3.60    0.63 
 -12  -6  -2    3.53    0.50 
 -13  -6  -2   -0.35    0.60 
  13  -6   2    0.41    0.43 
 -13  -6  -2    0.52    0.49 
 -14  -6  -2    1.05    0.53 
  14  -6   2    0.60    0.47 
  15  -6   2    0.33    0.51 
 -15  -6  -2   -0.36    0.54 
 -15   6  -2   -0.68    0.63 
  15  -7  -2    0.62    0.56 
 -15  -7   2    1.23    0.63 
 -15  -7   2   -0.34    0.76 
 -15   7   2    0.62    0.69 
  14  -7  -2    0.03    0.51 
 -14  -7   2    0.08    0.59 
 -14  -7   2   -0.18    0.74 
 -14   7   2   -0.26    0.64 
  13  -7  -2    1.46    0.50 
 -13  -7   2    0.95    0.57 
 -13  -7   2    0.88    0.73 
 -13   7   2    1.48    0.59 
  12  -7  -2    2.74    0.44 
 -12  -7   2    3.30    0.56 
 -12  -7   2    2.72    0.71 
 -11  -7   2    0.10    0.47 
 -11  -7   2    0.04    0.61 
  11  -7  -2    0.59    0.43 
 -10  -7   2    2.16    0.48 
 -10  -7   2    2.73    0.59 
  10  -7  -2    2.89    0.43 
   9  -7  -2   -0.66    0.34 
  -9  -7   2   -0.50    0.45 
  -9  -7   2   -0.34    0.41 
   8  -7  -2    6.71    0.45 
  -8  -7   2    6.12    0.48 
  -8  -7   2    6.39    0.54 
  -7  -7   2    1.15    0.40 
  -7  -7   2   -0.19    0.39 
   7  -7  -2    1.23    0.35 
  -6  -7   2    5.84    0.48 
  -6  -7   2    6.08    0.45 
   6  -7  -2    5.99    0.41 
  -5  -7   2    7.23    0.48 
   5  -7  -2    6.85    0.40 
  -5  -7   2    6.89    0.55 
  -4  -7   2    1.58    0.31 
   4  -7  -2    1.42    0.30 
  -4  -7   2    1.06    0.35 
   4  -7  -2    1.66    0.31 
  -3  -7   2    0.42    0.29 
   3  -7  -2    0.68    0.29 
  -3  -7   2    0.70    0.30 
   3  -7  -2    0.85    0.30 
   3  -7  -2    0.73    0.28 
   3   7  -2    0.62    0.14 
   2  -7  -2   17.46    0.59 
  -2  -7   2   18.10    0.66 
  -2  -7   2   17.02    0.60 
   2  -7  -2   16.86    0.58 
   2  -7  -2   16.51    0.54 
  -2  -7   2   18.60    0.47 
   2   7  -2   17.82    0.46 
  -1  -7   2   -0.33    0.19 
   1  -7  -2    0.08    0.25 
   1  -7  -2   -0.04    0.29 
  -1  -7   2   -0.03    0.28 
  -1  -7   2    0.28    0.29 
   1  -7  -2    0.11    0.26 
   0  -7   2    2.19    0.23 
   0  -7   2    1.92    0.34 
   0  -7  -2    2.25    0.31 
   0  -7  -2    2.72    0.28 
   0  -7   2    2.03    0.31 
   0   7   2    2.21    0.24 
   1  -7   2    2.28    0.25 
   1  -7   2    2.27    0.34 
  -1  -7  -2    2.33    0.33 
  -1  -7  -2    2.62    0.26 
   1  -7   2    2.05    0.32 
   1   7   2    2.29    0.23 
  -2  -7  -2    0.89    0.26 
  -2  -7  -2    0.77    0.32 
   2  -7   2    1.19    0.31 
   2  -7   2    0.98    0.25 
   2   7   2    1.06    0.20 
  -3  -7  -2    5.11    0.35 
   3  -7   2    5.39    0.42 
   3  -7   2    5.68    0.41 
  -3  -7  -2    4.89    0.39 
   3   7   2    5.32    0.34 
   4  -7   2   17.60    0.58 
   4  -7   2   16.92    0.61 
  -4  -7  -2   17.22    0.64 
  -4  -7  -2   16.99    0.54 
   4   7   2   18.62    0.48 
   5  -7   2    0.16    0.35 
  -5  -7  -2    0.29    0.35 
   5  -7   2   -0.18    0.27 
  -5  -7  -2   -0.03    0.26 
   5   7   2    0.22    0.18 
   6  -7   2   14.68    0.60 
  -6  -7  -2   13.44    0.51 
   6  -7   2   13.78    0.58 
  -6  -7  -2   12.30    0.64 
   6   7   2   14.53    0.42 
  -7  -7  -2    3.90    0.40 
   7  -7   2    4.26    0.34 
  -7  -7  -2    4.23    0.36 
  -8  -7  -2   -0.36    0.34 
  -8  -7  -2   -0.21    0.40 
   8  -7   2   -0.29    0.33 
   9  -7   2    0.23    0.36 
  -9  -7  -2    0.54    0.42 
  -9  -7  -2    0.13    0.40 
 -10  -7  -2   -0.19    0.46 
 -10  -7  -2    0.74    0.46 
  10  -7   2    0.01    0.39 
 -11  -7  -2    0.45    0.48 
  11  -7   2   -0.10    0.42 
 -11  -7  -2   -0.04    0.52 
  12  -7   2    3.14    0.47 
 -12  -7  -2    2.41    0.54 
 -13  -7  -2    0.63    0.57 
  13  -7   2    0.09    0.42 
 -14  -7  -2    1.39    0.60 
  14  -7   2    1.02    0.50 
 -15  -7  -2   -0.43    0.61 
  15  -7   2    0.84    0.53 
 -14  -8   2   -1.71    0.78 
  14  -8  -2   -0.13    0.55 
 -14  -8   2    0.10    0.60 
 -14   8   2    0.71    0.70 
  13  -8  -2    0.42    0.52 
 -13  -8   2   -0.58    0.74 
 -13  -8   2   -0.70    0.57 
  12  -8  -2   -0.69    0.49 
 -12  -8   2   -0.34    0.69 
 -12  -8   2   -0.02    0.54 
  11  -8  -2    0.42    0.43 
 -11  -8   2   -0.88    0.62 
 -11  -8   2    0.33    0.52 
 -10  -8   2    1.08    0.59 
  10  -8  -2    1.85    0.47 
 -10  -8   2    2.00    0.52 
   9  -8  -2    0.96    0.44 
  -9  -8   2    0.99    0.52 
  -9  -8   2    0.37    0.47 
   8  -8  -2    0.94    0.41 
  -8  -8   2    0.84    0.46 
  -8  -8   2    0.65    0.46 
  -7  -8   2   -0.27    0.44 
  -7  -8   2    0.29    0.40 
   7  -8  -2   -0.22    0.38 
   6  -8  -2    1.47    0.39 
  -6  -8   2    1.52    0.40 
  -6  -8   2    1.33    0.43 
  -5  -8   2    1.45    0.38 
   5  -8  -2    1.04    0.37 
  -5  -8   2    1.29    0.42 
   4  -8  -2    7.65    0.47 
   4  -8  -2    7.13    0.42 
  -4  -8   2    6.79    0.48 
  -4  -8   2    6.06    0.47 
  -3  -8   2    2.11    0.35 
   3  -8  -2    2.00    0.36 
   3  -8  -2    1.93    0.34 
   3  -8  -2    2.55    0.34 
  -3  -8   2    2.52    0.42 
   2  -8  -2    2.48    0.37 
  -2  -8   2    2.98    0.38 
  -2  -8   2    2.18    0.41 
   2  -8  -2    2.55    0.33 
   2  -8  -2    2.65    0.34 
   2   8  -2    2.33    0.22 
  -1  -8   2    0.16    0.23 
   1  -8  -2    0.06    0.34 
   1  -8  -2    0.11    0.28 
   1  -8  -2   -0.15    0.29 
  -1  -8   2    0.24    0.35 
  -1  -8   2   -0.02    0.37 
  -1   8   2   -0.46    0.27 
   0  -8   2    1.32    0.38 
   0  -8   2    0.97    0.27 
   0  -8  -2    1.13    0.35 
   0  -8  -2    1.55    0.30 
   0  -8   2    1.04    0.34 
   0   8   2    1.20    0.26 
  -1  -8  -2   11.96    0.61 
   1  -8   2   10.54    0.57 
   1  -8   2   10.89    0.50 
  -1  -8  -2   11.05    0.45 
   1  -8   2   10.79    0.55 
   1   8   2   10.39    0.48 
   2  -8   2    0.17    0.28 
   2  -8   2    0.40    0.36 
  -2  -8  -2    0.46    0.36 
  -2  -8  -2    0.61    0.28 
   2   8   2    0.62    0.22 
  -3  -8  -2    2.04    0.31 
   3  -8   2    2.23    0.31 
   3  -8   2    1.95    0.38 
  -3  -8  -2    1.66    0.40 
   3   8   2    2.55    0.24 
   4  -8   2    5.29    0.38 
  -4  -8  -2    5.18    0.40 
   4  -8   2    6.33    0.47 
  -4  -8  -2    5.41    0.46 
   4   8   2    5.70    0.36 
   5  -8   2   27.69    0.87 
  -5  -8  -2   28.69    0.91 
   5  -8   2   29.58    0.83 
  -5  -8  -2   26.74    0.78 
   5   8   2   29.86    0.67 
  -6  -8  -2    4.05    0.47 
   6  -8   2    4.33    0.36 
   6  -8   2    5.79    0.48 
  -6  -8  -2    4.62    0.37 
  -7  -8  -2    7.15    0.53 
  -7  -8  -2    7.59    0.46 
   7  -8   2    7.92    0.46 
  -8  -8  -2    0.03    0.44 
   8  -8   2    0.85    0.38 
  -8  -8  -2   -0.21    0.36 
  -9  -8  -2    1.43    0.49 
   9  -8   2    0.74    0.41 
 -10  -8  -2    1.62    0.51 
  10  -8   2    1.91    0.44 
  11  -8   2   -0.48    0.44 
 -11  -8  -2    0.49    0.52 
  12  -8   2    1.17    0.44 
 -12  -8  -2    1.12    0.55 
 -13  -8  -2   -0.40    0.58 
  13  -8   2    0.32    0.50 
  14  -8   2    0.57    0.54 
 -14  -8  -2    0.93    0.65 
 -13  -9   2    0.81    0.66 
  13  -9  -2    0.30    0.55 
 -12  -9   2   -1.08    0.69 
 -12  -9   2    0.26    0.60 
  12  -9  -2   -0.20    0.48 
 -11  -9   2    2.07    0.66 
 -11  -9   2    1.78    0.59 
  11  -9  -2    1.92    0.54 
  10  -9  -2   -0.15    0.45 
 -10  -9   2   -0.34    0.57 
 -10  -9   2    0.12    0.55 
  -9  -9   2    0.40    0.52 
  -9  -9   2    0.78    0.54 
   9  -9  -2   -0.08    0.47 
  -8  -9   2    2.93    0.50 
   8  -9  -2    3.05    0.45 
  -8  -9   2    2.76    0.53 
   7  -9  -2    0.41    0.44 
  -7  -9   2    0.21    0.49 
  -7  -9   2   -0.02    0.45 
  -6  -9   2    0.62    0.43 
  -6  -9   2    0.16    0.47 
   6  -9  -2   -0.21    0.42 
   5  -9  -2    0.13    0.39 
  -5  -9   2   -0.09    0.41 
  -5  -9   2   -0.26    0.46 
   4  -9  -2    0.60    0.38 
   4  -9  -2    0.33    0.38 
  -4  -9   2    0.21    0.46 
  -4  -9   2    0.74    0.38 
   3  -9  -2    4.62    0.44 
   3  -9  -2    5.87    0.47 
   3  -9  -2    4.97    0.42 
  -3  -9   2    4.45    0.45 
  -3  -9   2    4.75    0.51 
  -2  -9   2    0.15    0.44 
   2  -9  -2    0.40    0.37 
  -2  -9   2    0.36    0.39 
   2  -9  -2    0.50    0.36 
   2  -9  -2    0.60    0.40 
   1  -9  -2    6.09    0.44 
  -1  -9   2    6.68    0.48 
  -1  -9   2    5.90    0.51 
  -1  -9   2    7.27    0.45 
   1  -9  -2    6.25    0.49 
  -1   9   2    6.14    0.39 
   1   9  -2    6.28    0.45 
   0  -9  -2    0.12    0.41 
   0  -9  -2    0.83    0.35 
   0  -9   2    0.85    0.44 
   0  -9   2    0.53    0.31 
   0  -9   2    0.18    0.37 
   0   9   2   -0.16    0.29 
   1  -9   2    6.31    0.50 
   1  -9   2    6.65    0.50 
   1  -9   2    6.72    0.40 
  -1  -9  -2    6.13    0.51 
  -1  -9  -2    6.77    0.46 
   1   9   2    6.53    0.36 
   2  -9   2    4.42    0.39 
  -2  -9  -2    4.46    0.39 
   2  -9   2    4.43    0.45 
  -2  -9  -2    4.07    0.49 
   2   9   2    4.45    0.30 
  -3  -9  -2    1.68    0.44 
  -3  -9  -2    2.45    0.34 
   3  -9   2    1.83    0.42 
   3  -9   2    1.55    0.37 
   3   9   2    1.99    0.26 
  -4  -9  -2    0.06    0.44 
   4  -9   2   -0.05    0.41 
  -4  -9  -2    0.02    0.33 
   4  -9   2   -0.18    0.36 
   5  -9   2    0.43    0.36 
  -5  -9  -2    0.33    0.35 
  -5  -9  -2   -0.08    0.46 
   5  -9   2   -0.38    0.43 
  -6  -9  -2    2.05    0.51 
   6  -9   2    2.81    0.42 
   6  -9   2    3.94    0.50 
  -6  -9  -2    3.37    0.38 
   7  -9   2   -0.37    0.40 
  -7  -9  -2    0.20    0.49 
  -8  -9  -2   -0.05    0.50 
   8  -9   2   -0.19    0.38 
  -9  -9  -2    1.25    0.55 
   9  -9   2    1.45    0.46 
  10  -9   2    0.76    0.49 
 -10  -9  -2   -0.16    0.55 
 -11  -9  -2    0.75    0.58 
  11  -9   2    0.40    0.46 
 -12  -9  -2    0.16    0.61 
  12  -9   2   -0.14    0.54 
  13  -9   2    1.01    0.57 
 -13  -9  -2    0.63    0.64 
 -11 -10   2   -0.17    0.61 
  11 -10  -2    0.76    0.58 
 -10 -10   2   -0.05    0.59 
 -10 -10   2   -0.09    0.61 
  10 -10  -2   -0.63    0.54 
   9 -10  -2    0.09    0.48 
  -9 -10   2   -0.31    0.55 
  -9 -10   2    0.10    0.57 
   8 -10  -2    1.21    0.52 
  -8 -10   2    1.03    0.53 
  -8 -10   2    0.70    0.56 
  -7 -10   2    0.17    0.55 
  -7 -10   2    0.16    0.49 
   7 -10  -2   -0.15    0.48 
  -6 -10   2    0.01    0.54 
   6 -10  -2    0.34    0.47 
  -6 -10   2   -0.12    0.46 
  -5 -10   2    2.35    0.56 
   5 -10  -2    2.20    0.48 
  -5 -10   2    2.52    0.48 
  -4 -10   2    3.33    0.57 
  -4 -10   2    3.01    0.49 
   4 -10  -2    4.25    0.47 
   4 -10  -2    4.14    0.50 
   3 -10  -2    0.04    0.41 
  -3 -10   2   -0.58    0.50 
  -3 -10   2    0.49    0.44 
   3 -10  -2    0.44    0.42 
   2 -10  -2    1.56    0.42 
  -2 -10   2    1.30    0.52 
  -2 -10   2    1.20    0.45 
   2 -10  -2    2.26    0.41 
   2 -10  -2    1.60    0.47 
  -2  10   2    1.32    0.40 
   1 -10  -2    0.14    0.45 
  -1 -10   2    0.61    0.44 
   1 -10  -2   -0.27    0.38 
  -1 -10   2   -0.02    0.49 
  -1  10   2    0.27    0.36 
   0 -10  -2    0.06    0.37 
   0 -10   2    0.06    0.47 
   0 -10  -2   -0.28    0.48 
   0 -10   2    0.85    0.33 
   0 -10   2   -0.07    0.41 
   0  10   2    0.27    0.33 
   1 -10   2    3.47    0.40 
   1 -10   2    3.40    0.47 
  -1 -10  -2    3.83    0.43 
   1 -10   2    4.23    0.52 
  -1 -10  -2    2.70    0.50 
   1  10   2    4.07    0.37 
  -2 -10  -2    1.79    0.40 
   2 -10   2    1.69    0.40 
  -2 -10  -2    1.14    0.48 
   2 -10   2    1.25    0.45 
   2  10   2    1.42    0.29 
   3 -10   2    0.10    0.40 
  -3 -10  -2   -0.77    0.48 
   3 -10   2    0.27    0.45 
  -3 -10  -2    0.57    0.38 
   4 -10   2    0.43    0.47 
   4 -10   2    0.13    0.38 
  -4 -10  -2    0.48    0.52 
  -5 -10  -2   -0.10    0.51 
   5 -10   2    0.40    0.42 
   5 -10   2    1.27    0.50 
  -6 -10  -2    5.43    0.60 
   6 -10   2    5.29    0.51 
   7 -10   2   -0.15    0.45 
  -7 -10  -2    0.85    0.54 
  -8 -10  -2    0.65    0.51 
   8 -10   2    1.19    0.49 
  -9 -10  -2    0.88    0.59 
   9 -10   2    0.99    0.52 
  10 -10   2   -0.87    0.51 
 -10 -10  -2   -0.31    0.59 
  11 -10   2   -0.04    0.55 
 -11 -10  -2    0.25    0.63 
 -10 -11   2   -0.39    0.67 
  10 -11  -2   -0.38    0.61 
   9 -11  -2    0.07    0.57 
  -9 -11   2    0.30    0.64 
   8 -11  -2    0.08    0.55 
  -8 -11   2   -0.31    0.62 
  -8 -11   2   -0.33    0.54 
  -7 -11   2    0.46    0.54 
   7 -11  -2    0.60    0.55 
  -7 -11   2    0.78    0.62 
  -6 -11   2    0.35    0.61 
   6 -11  -2    0.21    0.52 
  -6 -11   2   -0.56    0.50 
   5 -11  -2    0.24    0.51 
  -5 -11   2    0.07    0.59 
  -5 -11   2   -0.14    0.46 
  -4 -11   2   -0.47    0.49 
  -4 -11   2    0.60    0.59 
   4 -11  -2    0.72    0.48 
  -3 -11   2    1.31    0.59 
   3 -11  -2    1.77    0.47 
  -3 -11   2    1.61    0.50 
   3 -11  -2    2.05    0.53 
  -3  11   2    0.83    0.43 
   2 -11  -2    1.41    0.54 
  -2 -11   2    1.69    0.59 
  -2 -11   2    1.68    0.47 
   2 -11  -2    1.44    0.47 
  -2  11   2    1.33    0.43 
   1 -11  -2    0.51    0.44 
  -1 -11   2    0.63    0.56 
  -1 -11   2    0.20    0.49 
   1 -11  -2    0.50    0.54 
  -1  11   2   -0.34    0.39 
   0 -11  -2   -0.32    0.55 
   0 -11   2    0.95    0.56 
   0 -11   2    0.38    0.50 
   0 -11  -2    0.60    0.42 
   0  11   2    0.08    0.37 
  -1 -11  -2    0.57    0.57 
  -1 -11  -2    1.35    0.44 
   1 -11   2    1.05    0.49 
  -2 -11  -2   -0.04    0.53 
   2 -11   2    0.13    0.43 
   2 -11   2    0.08    0.51 
   3 -11   2    0.00    0.42 
  -3 -11  -2    0.57    0.56 
   3 -11   2    0.80    0.53 
   4 -11   2    1.29    0.52 
   4 -11   2    1.25    0.49 
  -4 -11  -2    1.28    0.58 
   5 -11   2    0.54    0.58 
  -5 -11  -2    0.83    0.59 
   5 -11   2    0.33    0.51 
  -6 -11  -2    0.22    0.61 
   6 -11   2    0.11    0.48 
  -7 -11  -2   -0.20    0.61 
   7 -11   2    0.78    0.51 
   8 -11   2    0.41    0.54 
  -8 -11  -2    0.77    0.63 
  -9 -11  -2   -0.22    0.64 
   9 -11   2   -0.73    0.54 
  -7 -12   2    0.03    0.68 
   7 -12  -2    0.14    0.59 
   6 -12  -2    0.62    0.61 
  -6 -12   2    0.37    0.68 
  -5 -12   2    0.02    0.54 
   5 -12  -2   -0.81    0.58 
  -5 -12   2   -0.70    0.65 
   4 -12  -2    0.79    0.53 
  -4 -12   2    0.67    0.54 
  -4 -12   2    0.29    0.65 
  -4  12   2   -0.23    0.51 
   3 -12  -2    1.09    0.57 
  -3 -12   2    0.15    0.54 
  -3 -12   2    1.09    0.65 
  -3  12   2   -0.39    0.46 
  -2 -12   2    0.13    0.67 
   2 -12  -2   -0.22    0.49 
  -2 -12   2   -0.19    0.53 
   2 -12  -2    1.22    0.60 
  -2  12   2   -1.02    0.45 
  -1 -12   2    0.13    0.63 
   1 -12  -2    0.68    0.61 
  -1 -12   2    0.12    0.50 
   0 -12   2   -0.15    0.55 
   0 -12  -2    1.18    0.63 
   0 -12   2    1.00    0.61 
   1 -12   2    1.08    0.56 
  -1 -12  -2    1.23    0.64 
  -2 -12  -2   -0.18    0.60 
   2 -12   2    0.51    0.53 
   3 -12   2    0.58    0.58 
  -3 -12  -2   -0.52    0.65 
  -4 -12  -2    0.37    0.62 
   4 -12   2    0.00    0.52 
   4 -12   2    0.16    0.57 
  -5 -12  -2    0.38    0.64 
   5 -12   2    0.07    0.52 
   5 -12   2    0.97    0.62 
   6 -12   2    0.53    0.59 
  -6 -12  -2    0.68    0.66 
  -7 -12  -2    0.69    0.69 
   7 -12   2    1.02    0.63 
  -3 -13   2    0.70    0.76 
  -2 -13   2    0.07    0.70 
  -2 -13   2   -0.34    0.57 
   2 -13  -2    1.21    0.65 
  -1 -13   2    0.59    0.59 
   1 -13  -2    0.54    0.64 
  -1 -13   2    1.57    0.68 
   0 -13   2   -0.12    0.59 
   0 -13  -2    0.28    0.69 
  -1 -13  -2    0.18    0.70 
   1 -13   2   -0.18    0.60 
  -2 -13  -2   -0.58    0.72 
   2 -13   2    0.52    0.58 
  -3 -13  -2    0.02    0.70 
   3 -13   2    0.82    0.60 
 -17   0   3    3.20    0.62 
  16   0  -3   -0.02    0.41 
 -16   0   3    0.36    0.55 
  15   0  -3    8.31    0.55 
 -15   0   3    7.32    0.63 
 -14   0   3    1.06    0.51 
  14   0  -3   -0.37    0.34 
  13   0  -3    9.70    0.54 
 -13   0   3    9.81    0.68 
  12   0  -3   -0.33    0.28 
 -12   0   3    0.26    0.41 
 -11   0   3    6.52    0.50 
  11   0  -3    6.63    0.39 
 -11   0   3    6.54    0.37 
 -10   0   3    0.05    0.20 
 -10   0   3    0.51    0.35 
  10   0  -3   -0.07    0.22 
  -9   0   3   39.42    1.06 
  -9   0   3   40.95    0.91 
   9   0  -3   40.83    0.87 
   8   0  -3    0.08    0.16 
  -8   0   3    0.00    0.16 
  -8   0   3   -0.16    0.26 
  -7   0   3    3.93    0.33 
  -7   0   3    4.49    0.23 
   7   0  -3    4.61    0.27 
  -6   0   3    0.05    0.11 
   6   0  -3   -0.10    0.13 
  -6   0   3    0.09    0.21 
   5   0  -3    2.93    0.18 
  -5   0   3    2.87    0.22 
  -5   0   3    2.86    0.16 
  -4   0   3    0.08    0.08 
  -4   0   3   -0.14    0.15 
   4   0  -3    0.16    0.09 
  -3   0   3  112.23    2.51 
   3   0  -3  111.47    2.13 
  -2   0   3    0.21    0.10 
  -2   0   3    0.20    0.06 
  -1   0   3  892.48   17.61 
  -1   0   3  880.61   20.42 
   0   0   3   -0.04    0.05 
   0   0   3    0.03    0.05 
   1   0   3   34.34    0.77 
   1   0   3   33.82    0.67 
   2   0   3    0.00    0.06 
   2   0   3   -0.03    0.08 
   3   0   3  110.31    2.10 
   4   0   3    0.06    0.09 
  -5   0  -3  175.63    3.65 
   5   0   3  176.00    3.34 
  -6   0  -3   -0.06    0.15 
   6   0   3    0.18    0.13 
  -7   0  -3   66.82    1.46 
   7   0   3   68.12    1.35 
   8   0   3    0.02    0.17 
  -8   0  -3    0.10    0.19 
  -8   0  -3    0.16    0.21 
  -9   0  -3    2.00    0.24 
   9   0   3    2.35    0.22 
  -9   0  -3    1.99    0.27 
 -10   0  -3    0.22    0.23 
  10   0   3    0.28    0.23 
 -10   0  -3    0.15    0.29 
 -11   0  -3    3.32    0.31 
  11   0   3    3.42    0.30 
 -11   0  -3    3.92    0.37 
 -12   0  -3    0.59    0.32 
  12   0   3    0.01    0.28 
 -12   0  -3    1.08    0.36 
  13   0   3    0.31    0.31 
 -13   0  -3    0.34    0.34 
 -13   0  -3    0.37    0.39 
  14   0   3   -0.32    0.35 
 -14   0  -3    0.05    0.39 
 -14   0  -3    0.05    0.46 
  15   0   3    3.04    0.40 
 -15   0  -3    2.89    0.52 
  16   0   3   -0.26    0.39 
 -16   0  -3    0.48    0.53 
 -17   0  -3    0.80    0.60 
  17   0   3    0.11    0.43 
 -17  -1   3    1.12    0.58 
  17  -1  -3    0.63    0.44 
 -17   1   3    1.08    0.61 
 -16  -1   3    0.47    0.53 
  16  -1  -3    0.22    0.43 
 -16   1   3    0.10    0.57 
 -15  -1   3    0.46    0.50 
  15  -1  -3    0.21    0.40 
 -15   1   3    0.72    0.54 
  14  -1  -3    0.12    0.37 
 -14  -1   3    0.76    0.49 
  14   1  -3    0.26    0.33 
 -14   1   3    0.38    0.49 
  13  -1  -3    0.35    0.34 
 -13  -1   3    0.78    0.46 
 -13   1   3    1.43    0.47 
  13   1  -3    0.17    0.30 
 -12  -1   3    1.37    0.43 
  12  -1  -3    0.50    0.29 
 -12  -1   3    0.29    0.30 
 -12   1   3    0.81    0.41 
  12   1  -3    0.63    0.28 
 -11  -1   3    7.41    0.42 
  11  -1  -3    6.50    0.43 
 -11  -1   3    6.28    0.51 
  11   1  -3    6.66    0.41 
 -11   1   3    5.84    0.49 
  10  -1  -3   28.74    0.71 
 -10  -1   3   27.70    0.72 
 -10  -1   3   29.63    0.91 
 -10   1   3   27.72    0.86 
 -10   1   3   28.37    0.66 
  10   1  -3   28.35    0.68 
  -9  -1   3   54.68    1.38 
   9  -1  -3   53.44    1.13 
  -9  -1   3   53.34    1.19 
  -9   1   3   53.56    1.15 
   9   1  -3   55.02    1.10 
  -9   1   3   51.65    1.34 
  -8  -1   3   30.18    0.72 
   8  -1  -3   31.04    0.70 
  -8  -1   3   30.13    0.85 
  -8   1   3   30.40    0.67 
   8   1  -3   29.71    0.66 
  -8   1   3   29.41    0.83 
  -7  -1   3   35.81    0.94 
  -7  -1   3   35.67    0.80 
   7  -1  -3   34.18    0.77 
  -7   1   3   34.11    0.90 
   7   1  -3   34.61    0.73 
  -7   1   3   34.79    0.75 
  -6  -1   3    4.69    0.30 
  -6  -1   3    4.78    0.25 
   6  -1  -3    4.79    0.27 
  -6   1   3    4.83    0.16 
  -6   1   3    4.19    0.28 
   6   1  -3    3.85    0.22 
  -5  -1   3   67.09    1.41 
   5  -1  -3   66.49    1.31 
  -5  -1   3   65.66    1.56 
  -5   1   3   64.96    1.52 
   5   1  -3   67.17    1.28 
  -4  -1   3  155.71    3.61 
  -4  -1   3  161.35    3.35 
   4  -1  -3  167.87    3.08 
  -4   1   3  159.08    3.59 
   4   1  -3  164.04    3.06 
  -3  -1   3  228.78    4.63 
  -3  -1   3  227.60    4.97 
  -3  -1   3  223.22    4.23 
   3  -1  -3  221.92    4.25 
  -3   1   3  220.30    4.95 
  -2  -1   3  391.62    7.30 
  -2  -1   3  388.07    7.99 
  -2  -1   3  385.07    8.56 
   2  -1  -3  374.77    7.33 
  -2   1   3  397.70    8.53 
  -1  -1   3  101.63    1.97 
  -1  -1   3  104.59    2.32 
  -1   1   3  103.38    2.30 
  -1   1   3  107.13    1.99 
   0  -1   3   27.03    0.54 
   0  -1   3   28.60    0.64 
   0   1   3   27.73    0.55 
   0   1   3   27.36    0.62 
  -1  -1  -3   37.95    0.79 
   1  -1   3   37.42    0.85 
   1  -1   3   36.32    0.72 
   1   1   3   36.62    0.73 
   2  -1   3    2.54    0.14 
  -2  -1  -3    2.86    0.17 
   2  -1   3    2.73    0.15 
   2   1   3    2.59    0.14 
   3  -1   3   59.83    1.33 
  -3  -1  -3   60.18    1.26 
   3  -1   3   57.16    1.14 
   3   1   3   58.46    1.14 
  -4  -1  -3    5.34    0.22 
  -4  -1  -3    5.48    0.25 
   4  -1   3    5.06    0.22 
   4   1   3    5.11    0.20 
  -5  -1  -3   37.18    0.89 
  -5  -1  -3   38.04    0.85 
   5  -1   3   37.92    0.78 
   5   1   3   37.58    0.76 
  -6  -1  -3   56.38    1.22 
  -6  -1  -3   54.09    1.28 
   6  -1   3   55.74    1.11 
   6   1   3   55.53    1.10 
  -7  -1  -3   58.12    1.30 
   7  -1   3   59.56    1.20 
  -7  -1  -3   59.24    1.39 
   7   1   3   60.23    1.19 
  -8  -1  -3   28.92    0.73 
   8  -1   3   29.26    0.67 
  -8  -1  -3   28.44    0.77 
  -8   1  -3   30.23    0.73 
   8   1   3   29.76    0.68 
  -9  -1  -3    1.78    0.27 
   9  -1   3    1.29    0.23 
  -9  -1  -3    1.47    0.24 
  -9   1  -3    2.00    0.24 
   9   1   3    1.47    0.20 
 -10  -1  -3    1.29    0.32 
 -10  -1  -3    0.78    0.26 
  10  -1   3    0.40    0.25 
  10   1   3    0.60    0.23 
 -10   1  -3    0.75    0.24 
 -10   1  -3    1.33    0.30 
 -11  -1  -3   13.48    0.60 
  11  -1   3   13.78    0.52 
 -11  -1  -3   14.33    0.58 
 -11   1  -3   13.41    0.62 
 -11   1  -3   14.10    0.57 
  11   1   3   13.35    0.52 
 -12  -1  -3    9.93    0.57 
 -12  -1  -3   10.97    0.64 
  12  -1   3    9.50    0.51 
 -12   1  -3   11.06    0.62 
  12   1   3   10.05    0.48 
 -12   1  -3   10.23    0.55 
 -13  -1  -3    4.48    0.40 
  13  -1   3    3.98    0.36 
 -13  -1  -3    5.13    0.49 
 -13   1  -3    4.24    0.36 
 -13   1  -3    4.49    0.47 
  13   1   3    4.13    0.36 
 -14  -1  -3    0.37    0.44 
  14  -1   3   -0.46    0.34 
 -14  -1  -3   -0.29    0.39 
  14   1   3   -0.16    0.34 
 -14   1  -3    0.65    0.43 
  15  -1   3    0.17    0.38 
 -15  -1  -3   -0.02    0.51 
 -15  -1  -3    0.48    0.46 
 -15   1  -3    0.35    0.51 
  15   1   3    0.14    0.37 
  16  -1   3   -0.13    0.44 
 -16  -1  -3    0.15    0.52 
 -16   1  -3    1.10    0.53 
  16   1   3    0.16    0.38 
  17  -1   3    0.04    0.45 
 -17  -1  -3    0.42    0.60 
 -17   1  -3    1.06    0.58 
  17   1   3    1.49    0.45 
 -17  -2   3    1.37    0.58 
  17  -2  -3   -0.36    0.46 
 -17   2   3    0.35    0.60 
 -16  -2   3    1.77    0.57 
  16  -2  -3    1.03    0.47 
 -16   2   3    2.11    0.59 
 -15  -2   3    1.25    0.52 
  15  -2  -3    0.42    0.40 
 -15   2   3    0.40    0.54 
 -14  -2   3    1.17    0.50 
  14  -2  -3    0.57    0.38 
 -14   2   3    0.84    0.50 
 -13  -2   3    1.45    0.37 
  13  -2  -3    1.33    0.35 
 -13  -2   3    1.73    0.49 
 -13   2   3    1.53    0.46 
  12  -2  -3    8.37    0.51 
 -12  -2   3    8.15    0.48 
 -12  -2   3    9.59    0.66 
 -12   2   3    8.24    0.63 
  12   2  -3    9.04    0.45 
 -11  -2   3    1.57    0.32 
  11  -2  -3    1.20    0.30 
 -11  -2   3    2.08    0.44 
  11   2  -3    1.03    0.23 
 -11   2   3    1.86    0.35 
 -10  -2   3   41.57    1.16 
 -10  -2   3   39.84    0.98 
  10  -2  -3   40.77    0.94 
  10   2  -3   42.03    0.88 
 -10   2   3   39.36    1.09 
   9  -2  -3    1.46    0.25 
  -9  -2   3    1.93    0.25 
  -9  -2   3    1.38    0.37 
   9   2  -3    1.65    0.18 
  -9   2   3    1.52    0.30 
  -8  -2   3   11.52    0.57 
  -8  -2   3   11.19    0.41 
   8  -2  -3   10.82    0.42 
  -8   2   3   10.91    0.49 
   8   2  -3   10.52    0.34 
   7  -2  -3   39.16    0.85 
  -7  -2   3   39.66    0.92 
  -7  -2   3   39.78    1.06 
   7   2  -3   40.12    0.80 
  -7   2   3   39.79    1.00 
  -6  -2   3    4.46    0.28 
  -6  -2   3    4.53    0.32 
   6  -2  -3    4.30    0.30 
  -6   2   3    4.12    0.31 
   6   2  -3    4.55    0.20 
   5  -2  -3  142.82    2.73 
  -5  -2   3  142.54    3.21 
  -5  -2   3  142.05    2.96 
  -5   2   3  137.82    3.16 
   5   2  -3  143.39    2.68 
   4  -2  -3    6.80    0.28 
  -4  -2   3    6.80    0.26 
  -4  -2   3    6.26    0.32 
  -4   2   3    6.77    0.27 
   3  -2  -3   17.74    0.39 
  -3  -2   3   18.33    0.45 
   3  -2  -3   17.82    0.44 
  -3  -2   3   18.09    0.49 
   2  -2  -3  207.99    4.02 
  -2  -2   3  215.62    4.69 
  -2  -2   3  216.00    4.39 
  -2  -2   3  206.84    3.98 
   2  -2  -3  213.07    4.36 
  -1  -2   3  127.62    2.45 
   1  -2  -3  129.29    2.68 
  -1  -2   3  128.63    2.71 
  -1  -2   3  131.30    2.89 
  -1   2   3  130.96    2.48 
   0  -2   3  327.61    6.34 
   0  -2  -3  332.33    6.92 
   0  -2   3  341.15    7.43 
   0   2   3  342.25    6.36 
   1  -2   3   41.08    0.82 
  -1  -2  -3   42.24    0.91 
   1  -2   3   42.36    0.97 
   1   2   3   42.80    0.83 
  -2  -2  -3   17.95    0.40 
  -2  -2  -3   17.36    0.44 
   2  -2   3   17.74    0.38 
   2  -2   3   17.89    0.46 
   2   2   3   17.15    0.38 
  -3  -2  -3   16.97    0.42 
   3  -2   3   16.50    0.44 
   3  -2   3   16.47    0.38 
  -3  -2  -3   16.76    0.43 
   3   2   3   16.41    0.37 
   4  -2   3  141.43    3.02 
  -4  -2  -3  126.49    3.01 
  -4  -2  -3  134.96    2.83 
   4  -2   3  136.33    2.59 
   4   2   3  138.12    2.58 
  -5  -2  -3   13.27    0.41 
   5  -2   3   13.06    0.35 
  -5  -2  -3   12.73    0.41 
   5   2   3   13.26    0.34 
  -6  -2  -3  122.38    2.79 
   6  -2   3  126.79    2.40 
  -6  -2  -3  123.39    2.61 
   6   2   3  122.45    2.37 
  -7  -2  -3   53.69    1.30 
  -7  -2  -3   52.10    1.20 
   7  -2   3   53.78    1.11 
   7   2   3   53.47    1.08 
  -8  -2  -3    0.23    0.26 
  -8  -2  -3    0.61    0.23 
   8  -2   3    0.29    0.19 
   8   2   3    0.25    0.16 
   9  -2   3    4.66    0.34 
  -9  -2  -3    4.05    0.30 
  -9  -2  -3    5.08    0.37 
   9   2   3    4.68    0.31 
 -10  -2  -3    3.64    0.36 
 -10  -2  -3    3.36    0.32 
  10  -2   3    2.69    0.29 
 -10   2  -3    3.40    0.27 
  10   2   3    3.05    0.24 
  11  -2   3   15.96    0.58 
 -11  -2  -3   15.27    0.60 
 -11  -2  -3   15.93    0.67 
 -11   2  -3   16.37    0.55 
  11   2   3   15.45    0.50 
  12  -2   3    0.21    0.31 
 -12  -2  -3    0.47    0.36 
 -12  -2  -3    0.74    0.39 
 -12   2  -3    0.13    0.30 
 -12   2  -3    0.49    0.38 
  12   2   3   -0.22    0.27 
 -13  -2  -3    2.94    0.42 
  13  -2   3    2.86    0.38 
 -13  -2  -3    4.47    0.51 
  13   2   3    3.32    0.34 
 -13   2  -3    3.42    0.35 
 -13   2  -3    3.82    0.47 
  14  -2   3    7.14    0.47 
 -14  -2  -3    9.01    0.65 
 -14  -2  -3    8.43    0.62 
 -14   2  -3    8.60    0.73 
  14   2   3    8.43    0.53 
 -15  -2  -3    0.35    0.49 
  15  -2   3   -0.59    0.40 
 -15  -2  -3   -0.41    0.45 
  15   2   3   -0.15    0.35 
 -15   2  -3   -0.53    0.48 
 -16  -2  -3    2.91    0.56 
  16  -2   3    0.89    0.44 
 -16   2  -3    1.34    0.53 
 -17  -2  -3    0.23    0.55 
  17  -2   3   -0.03    0.46 
 -17   2  -3   -0.67    0.56 
  17  -3  -3    0.27    0.48 
 -17  -3   3    1.30    0.59 
 -17   3   3    0.38    0.64 
  16  -3  -3    0.55    0.46 
 -16  -3   3    1.91    0.58 
 -16   3   3    1.32    0.60 
 -15  -3   3    3.64    0.59 
  15  -3  -3    2.58    0.45 
 -15   3   3    3.47    0.58 
 -14  -3   3    0.69    0.53 
 -14  -3   3   -0.18    0.40 
  14  -3  -3    0.29    0.39 
 -14   3   3    1.06    0.50 
 -13  -3   3    3.16    0.52 
  13  -3  -3    2.07    0.39 
 -13  -3   3    2.19    0.42 
 -13   3   3    2.17    0.48 
 -12  -3   3    6.87    0.57 
  12  -3  -3    6.21    0.42 
 -12  -3   3    6.49    0.51 
 -12   3   3    5.73    0.50 
 -11  -3   3    0.15    0.33 
 -11  -3   3    0.62    0.46 
  11  -3  -3   -0.40    0.30 
 -11   3   3    0.63    0.39 
  10  -3  -3    7.76    0.48 
 -10  -3   3    8.25    0.63 
 -10  -3   3    7.58    0.44 
  10   3  -3    8.71    0.34 
 -10   3   3    7.90    0.55 
   9  -3  -3    8.61    0.46 
  -9  -3   3    7.83    0.60 
  -9  -3   3    8.51    0.46 
   9   3  -3    8.91    0.32 
  -9   3   3    9.33    0.52 
   8  -3  -3    9.10    0.44 
  -8  -3   3    7.77    0.56 
  -8  -3   3    8.96    0.43 
   8   3  -3    8.65    0.29 
  -8   3   3    9.04    0.47 
  -7  -3   3    9.09    0.39 
  -7  -3   3    8.15    0.52 
   7  -3  -3    8.89    0.41 
  -7   3   3    9.19    0.42 
   7   3  -3    9.28    0.26 
  -6  -3   3   -0.02    0.26 
  -6  -3   3   -0.13    0.21 
   6  -3  -3    0.48    0.17 
   6   3  -3    0.64    0.08 
  -5  -3   3  105.13    2.40 
   5  -3  -3  102.26    2.04 
  -5  -3   3  105.42    2.22 
  -4  -3   3   37.08    0.86 
   4  -3  -3   38.09    0.81 
  -4  -3   3   37.32    0.93 
   4  -3  -3   36.78    0.79 
   3  -3  -3   71.70    1.44 
  -3  -3   3   72.62    1.56 
   3  -3  -3   71.98    1.52 
  -3  -3   3   73.71    1.66 
  -2  -3   3  127.30    2.62 
   2  -3  -3  123.88    2.40 
  -2  -3   3  125.11    2.79 
   2  -3  -3  123.46    2.59 
  -2  -3   3  123.12    2.35 
  -1  -3   3   58.28    1.31 
   1  -3  -3   56.07    1.21 
  -1  -3   3   55.18    1.08 
  -1  -3   3   57.01    1.24 
  -1   3   3   56.07    1.12 
   0  -3  -3   29.71    0.68 
   0  -3  -3   29.72    0.68 
   0  -3   3   29.32    0.72 
   0  -3   3   29.80    0.60 
   0   3   3   29.73    0.62 
  -1  -3  -3  246.94    5.38 
   1  -3   3  242.99    4.63 
  -1  -3  -3  242.10    5.07 
   1  -3   3  247.98    5.42 
   1   3   3  244.95    4.63 
  -2  -3  -3   64.13    1.40 
  -2  -3  -3   62.42    1.36 
   2  -3   3   63.45    1.44 
   2  -3   3   61.73    1.23 
   2   3   3   62.71    1.23 
   3  -3   3  103.99    2.00 
   3  -3   3  103.10    2.33 
  -3  -3  -3  104.55    2.29 
  -3  -3  -3  102.22    2.19 
   3   3   3  102.96    1.98 
   4  -3   3   51.99    1.07 
   4  -3   3   52.54    1.24 
  -4  -3  -3   52.41    1.18 
  -4  -3  -3   55.62    1.22 
   4   3   3   53.21    1.05 
   5  -3   3    1.10    0.16 
  -5  -3  -3    1.35    0.20 
   5  -3   3    1.15    0.23 
  -5  -3  -3    1.01    0.20 
   5   3   3    0.97    0.13 
  -6  -3  -3   38.22    0.92 
   6  -3   3   37.81    0.82 
  -6  -3  -3   37.63    0.98 
   6   3   3   38.66    0.79 
   7  -3   3    5.36    0.36 
  -7  -3  -3    5.48    0.39 
  -7  -3  -3    4.56    0.34 
   7   3   3    5.08    0.28 
  -8  -3  -3   12.01    0.58 
   8  -3   3   13.11    0.48 
  -8  -3  -3   13.06    0.52 
   8   3   3   14.25    0.40 
  -9  -3  -3    3.81    0.39 
   9  -3   3    3.92    0.30 
  -9  -3  -3    4.10    0.33 
   9   3   3    4.35    0.24 
 -10  -3  -3    1.09    0.32 
 -10  -3  -3    1.81    0.39 
  10  -3   3    1.66    0.26 
  10   3   3    1.01    0.22 
  11  -3   3    0.70    0.30 
 -11  -3  -3    0.56    0.34 
 -11  -3  -3    0.74    0.41 
 -11   3  -3   -0.08    0.27 
  11   3   3    0.17    0.23 
  12  -3   3    5.45    0.41 
 -12  -3  -3    6.20    0.46 
 -12  -3  -3    7.19    0.54 
  12   3   3    6.84    0.43 
 -12   3  -3    6.90    0.49 
 -13  -3  -3    4.83    0.45 
 -13  -3  -3    6.09    0.56 
  13  -3   3    4.46    0.41 
 -13   3  -3    4.68    0.50 
  13   3   3    4.33    0.34 
 -14  -3  -3    2.07    0.53 
  14  -3   3    0.70    0.40 
 -14  -3  -3    0.76    0.43 
 -14   3  -3    0.65    0.54 
  14   3   3    0.84    0.32 
 -15  -3  -3    0.42    0.46 
 -15  -3  -3    1.69    0.56 
  15  -3   3    0.60    0.42 
 -15   3  -3    0.04    0.54 
 -16  -3  -3    0.67    0.52 
  16  -3   3   -0.39    0.45 
 -16  -3  -3    0.87    0.54 
 -16   3  -3    0.10    0.64 
 -17  -3  -3    0.81    0.61 
  17  -3   3    0.50    0.52 
 -17   3  -3    0.60    0.58 
  17  -4  -3   -1.11    0.51 
 -17  -4   3    0.89    0.64 
  16  -4  -3    0.67    0.48 
 -16  -4   3    0.41    0.60 
 -16   4   3   -0.32    0.59 
 -15  -4   3    0.62    0.60 
  15  -4  -3   -0.31    0.45 
 -15   4   3    0.48    0.56 
 -14  -4   3    2.03    0.60 
 -14  -4   3    0.42    0.48 
  14  -4  -3    1.17    0.43 
 -14   4   3    1.44    0.53 
  13  -4  -3    4.66    0.45 
 -13  -4   3    5.31    0.63 
 -13  -4   3    4.48    0.47 
 -13   4   3    4.58    0.54 
 -12  -4   3   -0.01    0.39 
 -12  -4   3    0.53    0.49 
  12  -4  -3   -0.14    0.35 
 -12   4   3    0.02    0.45 
 -11  -4   3    8.63    0.71 
  11  -4  -3    7.64    0.54 
 -11  -4   3    8.18    0.51 
 -11   4   3    9.19    0.62 
  10  -4  -3    1.66    0.33 
 -10  -4   3    0.94    0.46 
 -10  -4   3    1.52    0.34 
 -10   4   3    1.09    0.39 
  -9  -4   3   16.63    0.59 
   9  -4  -3   16.67    0.55 
  -9  -4   3   15.21    0.76 
  -9   4   3   17.90    0.64 
  -8  -4   3   20.66    0.64 
   8  -4  -3   18.81    0.62 
  -8  -4   3   19.34    0.81 
  -7  -4   3   11.85    0.60 
   7  -4  -3   11.01    0.48 
  -7  -4   3   10.74    0.47 
   6  -4  -3   23.80    0.61 
  -6  -4   3   23.76    0.66 
  -6  -4   3   23.42    0.72 
  -5  -4   3   28.33    0.75 
   5  -4  -3   28.78    0.71 
  -5  -4   3   30.11    0.80 
  -4  -4   3  101.91    2.34 
   4  -4  -3  104.22    2.02 
  -4  -4   3  100.81    2.19 
   4  -4  -3  102.89    2.14 
  -3  -4   3    8.03    0.36 
   3  -4  -3    8.17    0.28 
   3  -4  -3    8.05    0.32 
  -3  -4   3    8.15    0.35 
   2  -4  -3    4.93    0.24 
  -2  -4   3    4.90    0.28 
  -2  -4   3    5.02    0.32 
   2  -4  -3    4.79    0.30 
  -2  -4   3    4.55    0.17 
  -1  -4   3  109.56    2.44 
   1  -4  -3  107.01    2.10 
  -1  -4   3  106.68    2.05 
  -1  -4   3  107.06    2.30 
   1  -4  -3  108.54    2.27 
   1  -4  -3  107.50    2.40 
  -1   4   3  108.21    2.09 
   0  -4   3    5.09    0.28 
   0  -4   3    4.23    0.30 
   0  -4   3    4.50    0.20 
   0  -4  -3    4.98    0.31 
   0  -4  -3    5.00    0.20 
   0   4   3    4.91    0.25 
   1  -4   3    1.29    0.12 
  -1  -4  -3    1.13    0.17 
  -1  -4  -3    1.35    0.13 
   1  -4   3    1.24    0.19 
   1   4   3    1.19    0.14 
   2  -4   3    0.94    0.20 
  -2  -4  -3    0.90    0.12 
  -2  -4  -3    0.69    0.16 
   2  -4   3    1.01    0.13 
   2   4   3    0.69    0.13 
   3  -4   3   30.84    0.68 
  -3  -4  -3   31.26    0.77 
   3  -4   3   29.84    0.79 
  -3  -4  -3   32.08    0.73 
   3   4   3   31.07    0.66 
  -4  -4  -3    4.43    0.22 
   4  -4   3    4.14    0.25 
   4  -4   3    4.27    0.27 
  -4  -4  -3    4.70    0.36 
   4   4   3    3.74    0.24 
   5  -4   3   38.10    0.96 
  -5  -4  -3   38.56    0.95 
   5  -4   3   39.28    0.85 
  -5  -4  -3   39.34    0.93 
   5   4   3   38.92    0.80 
  -6  -4  -3    5.09    0.29 
   6  -4   3    5.02    0.36 
  -6  -4  -3    4.43    0.30 
   6   4   3    4.82    0.26 
  -7  -4  -3    4.05    0.32 
  -7  -4  -3    4.62    0.35 
   7  -4   3    3.60    0.25 
   7   4   3    4.69    0.27 
  -8  -4  -3    1.02    0.30 
  -8  -4  -3    0.60    0.36 
   8  -4   3    0.81    0.23 
   8   4   3    1.34    0.19 
   9  -4   3   10.73    0.46 
  -9  -4  -3   11.37    0.55 
  -9  -4  -3    7.75    0.61 
   9   4   3   10.34    0.38 
 -10  -4  -3   19.26    0.69 
  10  -4   3   20.44    0.65 
 -10  -4  -3   15.65    0.78 
  10   4   3   19.92    0.54 
 -11  -4  -3    0.35    0.44 
  11  -4   3    0.48    0.33 
 -11  -4  -3    0.22    0.37 
  11   4   3    0.12    0.25 
 -12  -4  -3    3.42    0.52 
  12  -4   3    2.81    0.36 
 -12  -4  -3    2.76    0.43 
  12   4   3    3.05    0.28 
  13  -4   3    3.97    0.40 
 -13  -4  -3    4.25    0.47 
 -13  -4  -3    5.43    0.58 
 -14  -4  -3    0.56    0.55 
  14  -4   3   -0.35    0.37 
 -14  -4  -3    0.27    0.45 
 -14   4  -3    0.02    0.52 
  15  -4   3    5.23    0.51 
 -15  -4  -3    6.43    0.66 
 -15  -4  -3    5.54    0.58 
 -15   4  -3    4.85    0.65 
 -16  -4  -3    0.51    0.55 
 -16  -4  -3    1.50    0.61 
  16  -4   3   -0.24    0.48 
 -16   4  -3   -0.57    0.60 
  16  -5  -3    0.80    0.51 
 -16  -5   3    1.94    0.67 
 -16   5   3    0.50    0.63 
 -15  -5   3    0.49    0.53 
  15  -5  -3   -0.16    0.48 
 -15  -5   3    2.19    0.69 
 -15   5   3   -0.02    0.58 
 -14  -5   3    4.66    0.55 
  14  -5  -3    5.10    0.50 
 -14  -5   3    6.57    0.70 
 -14   5   3    5.30    0.64 
 -13  -5   3   -0.28    0.57 
 -13  -5   3    0.02    0.46 
  13  -5  -3    0.07    0.41 
 -13   5   3    0.71    0.52 
  12  -5  -3    2.09    0.42 
 -12  -5   3    2.12    0.57 
 -12  -5   3    1.39    0.45 
 -12   5   3    1.88    0.50 
 -11  -5   3   -0.73    0.49 
 -11  -5   3    0.07    0.38 
  11  -5  -3    0.24    0.36 
 -11   5   3   -0.01    0.44 
 -10  -5   3    2.09    0.49 
  10  -5  -3    2.47    0.37 
 -10  -5   3    2.31    0.38 
 -10   5   3    2.64    0.42 
  -9  -5   3    0.29    0.34 
  -9  -5   3   -0.72    0.43 
   9  -5  -3    0.21    0.32 
   8  -5  -3   10.02    0.47 
  -8  -5   3    9.54    0.59 
  -8  -5   3    9.07    0.56 
   7  -5  -3    0.04    0.27 
  -7  -5   3   -0.47    0.34 
  -7  -5   3   -0.40    0.29 
  -6  -5   3   31.40    0.89 
   6  -5  -3   30.38    0.79 
  -6  -5   3   29.60    0.82 
  -5  -5   3    4.71    0.33 
  -5  -5   3    5.10    0.38 
   5  -5  -3    4.77    0.28 
  -4  -5   3    6.42    0.40 
   4  -5  -3    6.53    0.31 
   4  -5  -3    6.95    0.41 
  -4  -5   3    6.60    0.41 
  -3  -5   3   24.46    0.69 
   3  -5  -3   25.07    0.65 
   3  -5  -3   24.92    0.62 
  -3  -5   3   25.46    0.70 
   3   5  -3   25.15    0.50 
   2  -5  -3   -0.06    0.19 
  -2  -5   3   -0.34    0.23 
  -2  -5   3    0.09    0.11 
  -2  -5   3    0.01    0.22 
   2  -5  -3   -0.04    0.18 
  -1  -5   3    5.90    0.32 
   1  -5  -3    5.58    0.25 
   1  -5  -3    4.95    0.32 
   1  -5  -3    5.59    0.33 
  -1  -5   3    4.66    0.23 
  -1  -5   3    5.55    0.37 
  -1   5   3    5.31    0.32 
   0  -5   3   66.55    1.55 
   0  -5   3   65.59    1.48 
   0  -5  -3   66.06    1.45 
   0  -5   3   65.85    1.30 
   0  -5  -3   65.68    1.50 
   0   5   3   66.31    1.33 
   1  -5   3   33.48    0.73 
  -1  -5  -3   33.41    0.80 
  -1  -5  -3   33.89    0.83 
   1  -5   3   33.28    0.85 
   1   5   3   34.61    0.73 
   2  -5   3  137.40    3.12 
  -2  -5  -3  139.75    3.07 
  -2  -5  -3  139.08    2.94 
   2  -5   3  137.10    2.67 
   2   5   3  138.75    2.66 
   3  -5   3    1.02    0.18 
  -3  -5  -3    1.11    0.24 
  -3  -5  -3    1.08    0.17 
   3  -5   3    1.52    0.26 
   3   5   3    1.14    0.15 
   4  -5   3   28.68    0.68 
  -4  -5  -3   28.90    0.71 
   4  -5   3   27.76    0.78 
  -4  -5  -3   29.05    0.79 
   4   5   3   29.25    0.63 
   5  -5   3   11.45    0.44 
  -5  -5  -3   11.26    0.39 
  -5  -5  -3   11.23    0.51 
   5  -5   3   11.01    0.47 
   5   5   3   11.59    0.34 
   6  -5   3    5.32    0.29 
  -6  -5  -3    4.56    0.34 
  -6  -5  -3    4.63    0.32 
   6  -5   3    4.61    0.35 
   6   5   3    5.38    0.27 
  -7  -5  -3   31.00    0.85 
   7  -5   3   33.03    0.81 
  -7  -5  -3   31.55    0.88 
   7   5   3   31.79    0.70 
  -8  -5  -3   10.60    0.51 
  -8  -5  -3    9.89    0.56 
   8  -5   3   10.30    0.47 
   8   5   3   10.18    0.37 
  -9  -5  -3   -0.25    0.33 
  -9  -5  -3   -1.04    0.36 
   9  -5   3    0.12    0.29 
   9   5   3   -0.21    0.20 
  10  -5   3    0.08    0.29 
 -10  -5  -3    0.24    0.38 
 -10  -5  -3   -0.52    0.45 
  10   5   3    0.09    0.22 
 -11  -5  -3    0.40    0.40 
 -11  -5  -3   -0.04    0.47 
  11  -5   3    0.74    0.35 
  12  -5   3    3.95    0.43 
 -12  -5  -3    4.99    0.48 
 -12  -5  -3    2.95    0.56 
 -13  -5  -3   -1.39    0.53 
 -13  -5  -3    0.24    0.45 
  13  -5   3    0.84    0.37 
 -14  -5  -3    0.17    0.61 
  14  -5   3   -0.28    0.44 
 -14  -5  -3    0.23    0.49 
  15  -5   3    0.91    0.48 
 -15  -5  -3    0.32    0.52 
 -15   5  -3    1.06    0.62 
  16  -5   3    1.70    0.52 
 -16  -5  -3    1.94    0.61 
 -16   5  -3    1.46    0.68 
  15  -6  -3   -0.18    0.51 
 -15  -6   3   -0.28    0.68 
 -15  -6   3    0.47    0.58 
 -15   6   3   -0.11    0.67 
 -14  -6   3   -0.75    0.69 
  14  -6  -3   -0.19    0.48 
 -14  -6   3   -0.17    0.54 
 -14   6   3    0.26    0.64 
 -13  -6   3    0.10    0.48 
 -13  -6   3   -0.86    0.62 
  13  -6  -3    0.54    0.42 
 -13   6   3    0.58    0.56 
  12  -6  -3    4.09    0.48 
 -12  -6   3    4.14    0.50 
 -12  -6   3    4.63    0.66 
 -12   6   3    4.94    0.58 
 -11  -6   3   -0.49    0.58 
  11  -6  -3    0.91    0.42 
 -11  -6   3    0.33    0.43 
 -11   6   3    0.44    0.47 
 -10  -6   3   -1.20    0.49 
 -10  -6   3   -0.31    0.40 
  10  -6  -3    0.06    0.34 
  -9  -6   3    3.11    0.44 
   9  -6  -3    3.08    0.36 
  -9  -6   3    3.52    0.52 
  -8  -6   3    8.37    0.56 
   8  -6  -3    7.76    0.56 
  -8  -6   3    8.02    0.64 
  -7  -6   3   34.79    0.95 
   7  -6  -3   33.18    0.87 
  -7  -6   3   34.95    1.00 
  -6  -6   3   33.40    0.92 
   6  -6  -3   32.83    0.87 
  -6  -6   3   33.51    0.94 
  -5  -6   3   16.31    0.59 
  -5  -6   3   17.29    0.62 
   5  -6  -3   17.18    0.62 
   4  -6  -3   28.84    0.74 
  -4  -6   3   30.14    0.83 
  -4  -6   3   29.39    0.82 
   4  -6  -3   29.69    0.74 
  -3  -6   3    0.73    0.30 
   3  -6  -3    0.94    0.23 
   3  -6  -3    0.70    0.23 
  -3  -6   3    0.83    0.29 
   3   6  -3    0.68    0.11 
   2  -6  -3    2.00    0.25 
   2  -6  -3    1.89    0.26 
   2  -6  -3    2.13    0.24 
  -2  -6   3    2.44    0.28 
  -2  -6   3    1.44    0.30 
  -2  -6   3    1.88    0.16 
  -1  -6   3   17.11    0.55 
   1  -6  -3   17.08    0.49 
   1  -6  -3   17.23    0.52 
   1  -6  -3   17.16    0.52 
  -1  -6   3   16.99    0.46 
  -1  -6   3   17.40    0.56 
  -1   6   3   17.54    0.51 
   0  -6   3   19.81    0.50 
   0  -6  -3   20.61    0.59 
   0  -6  -3   20.58    0.55 
   0  -6   3   20.46    0.64 
   0  -6   3   20.41    0.62 
   0   6   3   20.28    0.54 
   1  -6   3    0.61    0.27 
   1  -6   3    0.79    0.18 
  -1  -6  -3    0.87    0.26 
   1  -6   3    0.90    0.28 
  -1  -6  -3    0.34    0.19 
   1   6   3    0.69    0.18 
  -2  -6  -3   10.02    0.35 
  -2  -6  -3   10.70    0.45 
   2  -6   3   10.28    0.38 
   2  -6   3    9.35    0.44 
   2   6   3    9.94    0.38 
   3  -6   3   10.18    0.46 
  -3  -6  -3   10.09    0.53 
  -3  -6  -3   10.25    0.37 
   3  -6   3   11.04    0.41 
   3   6   3   10.17    0.37 
   4  -6   3    1.79    0.23 
   4  -6   3    1.60    0.31 
  -4  -6  -3    1.55    0.31 
  -4  -6  -3    1.79    0.22 
   4   6   3    1.59    0.19 
  -5  -6  -3    0.30    0.31 
  -5  -6  -3    0.37    0.22 
   5  -6   3    0.22    0.23 
   5  -6   3    0.68    0.32 
   5   6   3    0.27    0.16 
  -6  -6  -3    3.89    0.33 
   6  -6   3    4.93    0.41 
  -6  -6  -3    4.01    0.37 
   6  -6   3    4.18    0.31 
   6   6   3    4.45    0.31 
  -7  -6  -3    0.59    0.28 
  -7  -6  -3    0.33    0.35 
   7  -6   3    0.27    0.28 
   7   6   3    0.59    0.19 
   8  -6   3    7.04    0.40 
  -8  -6  -3    7.52    0.46 
  -8  -6  -3    7.40    0.59 
   8   6   3    7.16    0.34 
  -9  -6  -3    2.24    0.37 
   9  -6   3    2.47    0.35 
  -9  -6  -3    2.52    0.39 
   9   6   3    2.18    0.23 
 -10  -6  -3   12.30    0.67 
 -10  -6  -3   11.77    0.65 
  10  -6   3   12.61    0.64 
  11  -6   3    3.98    0.43 
 -11  -6  -3    4.40    0.49 
 -11  -6  -3    4.00    0.55 
 -12  -6  -3    0.10    0.46 
  12  -6   3   -0.12    0.37 
 -13  -6  -3    0.22    0.53 
  13  -6   3    0.06    0.40 
  14  -6   3    1.43    0.48 
 -14  -6  -3    1.58    0.54 
  15  -6   3   -0.16    0.49 
 -15  -6  -3    0.13    0.59 
  15  -7  -3    1.38    0.56 
 -15  -7   3    1.26    0.81 
 -15  -7   3    1.52    0.63 
 -15   7   3    1.22    0.70 
  14  -7  -3   -0.09    0.51 
 -14  -7   3   -1.55    0.74 
 -14  -7   3    0.26    0.55 
 -14   7   3    0.27    0.65 
 -13  -7   3    3.18    0.73 
 -13  -7   3    2.77    0.56 
  13  -7  -3    3.04    0.52 
 -13   7   3    3.07    0.64 
  12  -7  -3    1.82    0.48 
 -12  -7   3    2.13    0.72 
 -12  -7   3    2.01    0.52 
 -12   7   3    3.32    0.58 
  11  -7  -3    2.55    0.43 
 -11  -7   3    2.31    0.67 
 -11  -7   3    1.89    0.50 
 -10  -7   3    0.43    0.46 
  10  -7  -3    0.54    0.42 
 -10  -7   3    0.52    0.54 
  -9  -7   3    0.59    0.43 
   9  -7  -3    1.00    0.40 
  -9  -7   3    0.51    0.53 
   8  -7  -3    1.28    0.38 
  -8  -7   3    1.55    0.43 
  -8  -7   3    1.29    0.45 
  -7  -7   3    2.22    0.45 
  -7  -7   3    2.86    0.42 
   7  -7  -3    2.40    0.34 
  -6  -7   3    0.04    0.37 
  -6  -7   3   -0.13    0.35 
   6  -7  -3    0.07    0.33 
  -5  -7   3   -0.01    0.33 
   5  -7  -3    0.54    0.32 
  -5  -7   3    0.38    0.36 
  -4  -7   3    1.44    0.35 
   4  -7  -3    1.42    0.32 
   4  -7  -3    1.54    0.29 
  -4  -7   3    1.79    0.37 
  -3  -7   3    6.03    0.45 
   3  -7  -3    6.81    0.44 
   3  -7  -3    6.93    0.37 
  -3  -7   3    6.68    0.44 
   3   7  -3    6.71    0.27 
   2  -7  -3    0.74    0.27 
  -2  -7   3    0.20    0.30 
  -2  -7   3    0.50    0.32 
   2  -7  -3    0.33    0.27 
   2  -7  -3    0.58    0.28 
  -2  -7   3    0.64    0.18 
   1  -7  -3    0.77    0.27 
   1  -7  -3    0.23    0.30 
   1  -7  -3    0.61    0.25 
  -1  -7   3    0.48    0.30 
  -1  -7   3    0.58    0.35 
  -1  -7   3    0.44    0.20 
  -1   7   3    0.53    0.23 
   0  -7   3    0.04    0.21 
   0  -7  -3   -0.07    0.29 
   0  -7   3   -0.16    0.33 
   0  -7  -3   -0.29    0.23 
   0  -7   3   -0.14    0.30 
   0   7   3    0.11    0.23 
   1  -7   3   51.70    1.26 
  -1  -7  -3   49.41    1.21 
  -1  -7  -3   50.14    1.20 
   1  -7   3   50.58    1.09 
   1   7   3   50.47    1.07 
   2  -7   3   11.30    0.51 
   2  -7   3   11.88    0.47 
  -2  -7  -3   11.45    0.52 
  -2  -7  -3   10.68    0.41 
   2   7   3   11.10    0.43 
   3  -7   3   14.00    0.55 
   3  -7   3   13.86    0.50 
  -3  -7  -3   13.14    0.46 
  -3  -7  -3   12.66    0.58 
   3   7   3   12.94    0.44 
  -4  -7  -3    0.19    0.34 
   4  -7   3    0.62    0.34 
  -4  -7  -3    0.43    0.24 
   4  -7   3    0.16    0.25 
   4   7   3    0.19    0.20 
   5  -7   3    0.36    0.36 
   5  -7   3    0.55    0.28 
  -5  -7  -3    0.47    0.35 
  -5  -7  -3    0.59    0.25 
   5   7   3    0.27    0.20 
   6  -7   3    6.29    0.46 
   6  -7   3    5.57    0.37 
  -6  -7  -3    5.03    0.44 
  -6  -7  -3    5.52    0.36 
   6   7   3    6.26    0.37 
   7  -7   3    5.86    0.39 
  -7  -7  -3    5.98    0.39 
  -7  -7  -3    4.95    0.46 
   7   7   3    6.87    0.37 
   8  -7   3    0.85    0.34 
  -8  -7  -3    1.33    0.41 
  -8  -7  -3    0.83    0.33 
   9  -7   3    1.11    0.37 
  -9  -7  -3    0.46    0.37 
  -9  -7  -3    1.03    0.43 
  10  -7   3    0.34    0.38 
 -10  -7  -3    0.16    0.45 
  11  -7   3    1.24    0.43 
 -11  -7  -3    1.95    0.49 
  12  -7   3   -0.10    0.44 
 -12  -7  -3   -0.08    0.50 
 -13  -7  -3    1.53    0.55 
  13  -7   3    1.58    0.48 
 -14  -7  -3   -0.22    0.56 
  14  -7   3   -0.19    0.50 
 -15  -7  -3    0.80    0.64 
  15  -7   3   -0.13    0.53 
  14  -8  -3    0.22    0.54 
 -14  -8   3   -0.01    0.82 
 -14  -8   3   -0.28    0.59 
 -14   8   3    0.33    0.70 
  13  -8  -3    0.51    0.53 
 -13  -8   3   -0.42    0.57 
 -13  -8   3   -0.37    0.77 
 -13   8   3   -0.60    0.64 
  12  -8  -3    0.04    0.50 
 -12  -8   3   -0.11    0.57 
 -12  -8   3   -0.08    0.72 
  11  -8  -3    0.17    0.47 
 -11  -8   3    1.04    0.53 
 -11  -8   3    0.52    0.63 
 -10  -8   3   -0.32    0.49 
  10  -8  -3    0.17    0.46 
 -10  -8   3   -0.30    0.60 
   9  -8  -3   -0.41    0.43 
  -9  -8   3   -0.31    0.47 
  -9  -8   3   -0.12    0.54 
   8  -8  -3    4.14    0.47 
  -8  -8   3    4.53    0.51 
  -8  -8   3    4.00    0.51 
  -7  -8   3   14.32    0.67 
  -7  -8   3   15.05    0.74 
   7  -8  -3   15.56    0.75 
  -6  -8   3    6.23    0.50 
   6  -8  -3    7.38    0.47 
  -6  -8   3    6.76    0.49 
  -5  -8   3    9.27    0.65 
   5  -8  -3    9.10    0.62 
  -5  -8   3    7.91    0.51 
  -4  -8   3   -0.12    0.41 
   4  -8  -3    0.65    0.34 
   4  -8  -3    0.08    0.35 
  -4  -8   3    0.29    0.37 
   3  -8  -3    1.24    0.34 
   3  -8  -3    1.38    0.34 
  -3  -8   3    1.03    0.41 
  -3  -8   3    0.89    0.38 
   2  -8  -3   10.98    0.55 
  -2  -8   3   11.60    0.53 
   2  -8  -3   10.44    0.54 
  -2  -8   3   11.59    0.42 
  -2  -8   3   10.61    0.64 
   2  -8  -3   11.37    0.47 
   2   8  -3   11.67    0.41 
  -2   8   3    9.49    0.55 
  -1  -8   3    0.22    0.39 
   1  -8  -3   -0.05    0.32 
  -1  -8   3    0.20    0.34 
   1  -8  -3   -0.13    0.29 
  -1  -8   3    0.13    0.23 
  -1   8   3   -0.41    0.26 
   0  -8   3    0.91    0.24 
   0  -8   3    0.96    0.39 
   0  -8  -3    1.58    0.30 
   0  -8  -3    0.67    0.36 
   0  -8   3    0.73    0.35 
   0   8   3    0.65    0.27 
   1  -8   3    5.08    0.44 
   1  -8   3    5.54    0.42 
  -1  -8  -3    4.38    0.34 
  -1  -8  -3    4.51    0.41 
   1  -8   3    4.87    0.32 
   1   8   3    5.04    0.31 
   2  -8   3    3.79    0.41 
  -2  -8  -3    4.25    0.42 
   2  -8   3    4.83    0.33 
  -2  -8  -3    4.61    0.32 
   2   8   3    4.10    0.29 
   3  -8   3    3.69    0.42 
   3  -8   3    3.71    0.32 
  -3  -8  -3    4.08    0.34 
  -3  -8  -3    3.74    0.43 
   3   8   3    3.56    0.26 
   4  -8   3    8.76    0.52 
   4  -8   3    7.48    0.54 
  -4  -8  -3    8.86    0.41 
  -4  -8  -3    9.30    0.60 
   4   8   3    8.10    0.43 
   5  -8   3    2.79    0.35 
  -5  -8  -3    3.02    0.32 
  -5  -8  -3    2.85    0.43 
   5  -8   3    3.60    0.44 
   5   8   3    2.09    0.23 
   6  -8   3    1.70    0.35 
  -6  -8  -3    1.65    0.44 
   6  -8   3    2.85    0.46 
  -6  -8  -3    2.30    0.32 
  -7  -8  -3    8.77    0.65 
   7  -8   3    7.60    0.46 
  -8  -8  -3    0.17    0.46 
   8  -8   3    0.23    0.38 
  -9  -8  -3    2.01    0.50 
   9  -8   3    3.37    0.44 
 -10  -8  -3    0.72    0.51 
  10  -8   3    0.91    0.44 
 -11  -8  -3    1.13    0.53 
  11  -8   3    0.97    0.46 
  12  -8   3    1.00    0.48 
 -12  -8  -3    0.93    0.55 
 -13  -8  -3    0.82    0.59 
  13  -8   3    0.06    0.51 
 -14  -8  -3   -0.22    0.59 
  14  -8   3   -0.08    0.52 
  13  -9  -3   -0.50    0.57 
 -13  -9   3   -0.61    0.74 
 -13  -9   3    0.96    0.62 
 -12  -9   3   -0.57    0.74 
 -12  -9   3    1.08    0.60 
  12  -9  -3    0.72    0.56 
 -11  -9   3    0.56    0.64 
  11  -9  -3   -0.12    0.53 
 -11  -9   3    0.07    0.60 
 -10  -9   3    1.20    0.56 
 -10  -9   3    0.45    0.58 
  10  -9  -3    0.64    0.51 
  -9  -9   3    0.36    0.52 
  -9  -9   3    0.48    0.58 
   9  -9  -3    0.14    0.44 
   8  -9  -3    4.50    0.48 
  -8  -9   3    4.43    0.57 
  -8  -9   3    4.51    0.56 
   7  -9  -3    0.37    0.45 
  -7  -9   3    0.16    0.49 
  -7  -9   3    0.04    0.44 
   6  -9  -3    3.12    0.46 
  -6  -9   3    3.89    0.53 
  -6  -9   3    3.36    0.49 
  -5  -9   3   -0.04    0.47 
  -5  -9   3   -0.23    0.42 
   5  -9  -3    0.05    0.41 
   4  -9  -3   -0.13    0.39 
  -4  -9   3   -0.54    0.46 
  -4  -9   3   -0.24    0.41 
   4  -9  -3    0.71    0.39 
   3  -9  -3    5.22    0.44 
  -3  -9   3    4.61    0.52 
   3  -9  -3    5.03    0.44 
  -3  -9   3    5.41    0.45 
   2  -9  -3    0.03    0.40 
  -2  -9   3    0.04    0.45 
   2  -9  -3    0.45    0.35 
   2  -9  -3   -0.04    0.35 
  -2  -9   3   -0.01    0.40 
  -2   9   3   -0.67    0.34 
   1  -9  -3    0.61    0.41 
  -1  -9   3    1.00    0.39 
  -1  -9   3    0.96    0.28 
  -1  -9   3    0.26    0.44 
   1  -9  -3    0.52    0.33 
  -1   9   3    0.22    0.31 
   0  -9  -3    1.58    0.41 
   0  -9   3    2.68    0.32 
   0  -9  -3    1.71    0.33 
   0  -9   3    1.14    0.45 
   0  -9   3    1.64    0.41 
   0   9   3    1.50    0.32 
  -1  -9  -3    1.85    0.32 
  -1  -9  -3   -0.12    0.41 
   1  -9   3    1.13    0.32 
   1  -9   3    1.28    0.41 
   1   9   3    0.96    0.29 
   2  -9   3    7.27    0.42 
  -2  -9  -3    7.76    0.44 
   2  -9   3    7.50    0.54 
  -2  -9  -3    7.65    0.60 
   2   9   3    8.01    0.48 
  -3  -9  -3    0.45    0.43 
   3  -9   3    0.23    0.34 
   3  -9   3   -0.07    0.42 
  -3  -9  -3    0.09    0.32 
   3   9   3    0.52    0.25 
  -4  -9  -3    3.46    0.34 
   4  -9   3    2.92    0.47 
   4  -9   3    3.39    0.38 
  -4  -9  -3    3.51    0.50 
   4   9   3    3.22    0.26 
  -5  -9  -3    1.62    0.43 
   5  -9   3    1.98    0.38 
   5  -9   3    2.78    0.48 
   6  -9   3    0.22    0.48 
   6  -9   3    0.35    0.38 
  -6  -9  -3    0.07    0.48 
   7  -9   3    0.29    0.40 
  -7  -9  -3    0.16    0.50 
   8  -9   3   -0.01    0.42 
  -8  -9  -3    0.84    0.51 
  -9  -9  -3    1.63    0.56 
   9  -9   3    1.73    0.41 
 -10  -9  -3    0.06    0.56 
  10  -9   3   -0.20    0.46 
 -11  -9  -3    0.19    0.58 
  11  -9   3    0.12    0.49 
 -12  -9  -3    2.48    0.63 
  12  -9   3    2.13    0.54 
 -11 -10   3    0.00    0.71 
  11 -10  -3   -0.04    0.57 
 -11 -10   3   -0.09    0.64 
 -10 -10   3    0.02    0.61 
  10 -10  -3    0.08    0.55 
 -10 -10   3   -0.26    0.64 
  -9 -10   3   -0.24    0.60 
   9 -10  -3   -0.40    0.52 
  -9 -10   3   -0.77    0.58 
   8 -10  -3    0.30    0.51 
  -8 -10   3    0.36    0.55 
  -8 -10   3   -0.46    0.57 
  -7 -10   3   -0.12    0.48 
  -7 -10   3    1.31    0.57 
   7 -10  -3   -0.09    0.44 
  -6 -10   3    0.37    0.46 
  -6 -10   3    1.00    0.57 
   6 -10  -3    1.34    0.48 
   5 -10  -3    3.01    0.49 
  -5 -10   3    2.38    0.56 
  -5 -10   3    2.31    0.51 
   4 -10  -3    0.77    0.47 
  -4 -10   3    0.67    0.54 
  -4 -10   3    0.89    0.45 
   4 -10  -3    1.55    0.46 
  -3 -10   3    0.45    0.46 
   3 -10  -3    0.30    0.45 
  -3 -10   3   -0.07    0.52 
   3 -10  -3   -0.01    0.41 
  -3  10   3   -0.07    0.38 
  -2 -10   3   -0.60    0.42 
  -2 -10   3   -0.07    0.51 
   2 -10  -3    0.48    0.46 
  -2  10   3    0.02    0.39 
  -1 -10   3   12.13    0.63 
   1 -10  -3   12.50    0.72 
   1 -10  -3   12.70    0.56 
  -1 -10   3   12.75    0.77 
  -1  10   3   12.60    0.68 
   0 -10  -3    0.44    0.38 
   0 -10   3    0.50    0.49 
   0 -10   3   -0.37    0.43 
   0 -10  -3    0.43    0.45 
   0  10   3    0.10    0.34 
  -1 -10  -3    0.34    0.49 
  -1 -10  -3    1.04    0.36 
   1 -10   3   -0.09    0.44 
   1 -10   3    0.33    0.35 
   1  10   3    0.48    0.33 
   2 -10   3   -0.16    0.37 
   2 -10   3    0.60    0.46 
  -2 -10  -3    0.21    0.48 
   2  10   3    0.71    0.32 
   3 -10   3    0.48    0.46 
   3 -10   3    0.32    0.37 
  -3 -10  -3    0.35    0.50 
  -4 -10  -3    1.11    0.51 
   4 -10   3    0.79    0.40 
   4 -10   3    0.70    0.49 
   5 -10   3    0.85    0.50 
   5 -10   3    0.56    0.44 
  -5 -10  -3    0.83    0.53 
  -6 -10  -3    0.14    0.54 
   6 -10   3    0.29    0.43 
   6 -10   3    0.89    0.52 
  -7 -10  -3   -0.37    0.55 
   7 -10   3    0.58    0.48 
  -8 -10  -3    1.18    0.58 
   8 -10   3    1.39    0.49 
  -9 -10  -3   -0.68    0.59 
   9 -10   3    0.09    0.50 
 -10 -10  -3    0.16    0.62 
  10 -10   3    0.53    0.53 
 -11 -10  -3   -0.14    0.64 
  11 -10   3    0.13    0.55 
   9 -11  -3    1.41    0.60 
  -9 -11   3    0.40    0.66 
  -9 -11   3    0.96    0.64 
  -8 -11   3    0.86    0.59 
  -8 -11   3   -0.33    0.64 
   8 -11  -3    0.74    0.56 
  -7 -11   3   -0.02    0.56 
  -7 -11   3   -0.40    0.61 
   7 -11  -3    0.35    0.55 
   6 -11  -3    0.62    0.52 
  -6 -11   3    0.97    0.56 
  -6 -11   3    0.35    0.54 
  -5 -11   3    0.52    0.53 
  -5 -11   3   -0.43    0.61 
   5 -11  -3    0.32    0.50 
  -4 -11   3   -0.09    0.47 
  -4 -11   3   -0.44    0.60 
   4 -11  -3   -0.40    0.48 
  -4  11   3   -0.85    0.47 
  -3 -11   3    1.42    0.52 
   3 -11  -3    2.46    0.52 
  -3 -11   3    1.67    0.59 
  -3  11   3    1.27    0.44 
  -2 -11   3   -0.03    0.51 
   2 -11  -3    0.55    0.52 
  -2 -11   3   -0.68    0.56 
  -2  11   3   -0.41    0.43 
  -1 -11   3    0.15    0.57 
  -1 -11   3    0.27    0.48 
   1 -11  -3    0.20    0.53 
   1 -11  -3   -0.19    0.44 
  -1  11   3   -0.87    0.40 
   0 -11   3    1.15    0.56 
   0 -11  -3    0.05    0.55 
   0 -11   3    0.27    0.49 
   0  11   3    0.73    0.39 
   1 -11   3   -0.51    0.51 
  -1 -11  -3   -0.50    0.51 
   1  11   3   -0.05    0.35 
  -2 -11  -3   -0.13    0.53 
   2 -11   3   -0.23    0.49 
   2 -11   3    0.14    0.41 
   3 -11   3    0.07    0.51 
  -3 -11  -3   -0.80    0.55 
   3 -11   3   -1.01    0.44 
   4 -11   3    0.36    0.53 
  -4 -11  -3   -0.11    0.57 
   4 -11   3   -0.64    0.47 
   5 -11   3    0.01    0.56 
  -5 -11  -3    0.37    0.59 
   5 -11   3    0.12    0.48 
   6 -11   3    0.69    0.58 
  -6 -11  -3   -0.19    0.60 
   6 -11   3   -0.26    0.48 
  -7 -11  -3    1.67    0.63 
   7 -11   3    2.02    0.54 
   8 -11   3    1.85    0.56 
  -8 -11  -3    0.41    0.63 
  -9 -11  -3   -0.76    0.64 
   9 -11   3   -0.27    0.55 
  -7 -12   3    0.37    0.70 
  -7 -12   3   -0.27    0.60 
   7 -12  -3    0.03    0.61 
  -6 -12   3    0.35    0.59 
   6 -12  -3    0.48    0.58 
  -6 -12   3    1.12    0.70 
  -6  12   3   -0.65    0.53 
  -5 -12   3   -0.99    0.56 
  -5 -12   3    0.46    0.72 
   5 -12  -3   -0.43    0.55 
  -5  12   3   -0.06    0.51 
  -4 -12   3   -0.07    0.56 
  -4 -12   3    0.35    0.66 
  -4  12   3   -0.05    0.52 
  -3 -12   3   -0.34    0.55 
  -3 -12   3   -0.14    0.65 
   3 -12  -3    0.46    0.56 
  -3  12   3   -0.97    0.47 
  -2 -12   3    0.72    0.69 
  -2 -12   3    0.74    0.53 
   2 -12  -3    0.39    0.59 
  -2  12   3   -0.07    0.48 
  -1 -12   3   -0.20    0.56 
  -1 -12   3    0.14    0.63 
   1 -12  -3    0.53    0.61 
  -1  12   3   -0.14    0.45 
   0 -12  -3    0.33    0.59 
   0 -12   3    0.38    0.53 
   1 -12   3    0.83    0.54 
  -1 -12  -3   -0.09    0.60 
  -2 -12  -3   -0.07    0.59 
   2 -12   3    0.00    0.57 
   3 -12   3    0.46    0.56 
  -3 -12  -3   -0.45    0.61 
  -4 -12  -3   -0.12    0.63 
   4 -12   3   -0.28    0.62 
   4 -12   3    0.24    0.52 
  -5 -12  -3    0.70    0.65 
   5 -12   3   -0.60    0.51 
   5 -12   3    0.69    0.61 
  -6 -12  -3   -0.37    0.66 
   6 -12   3    0.64    0.59 
  -7 -12  -3   -0.51    0.69 
   7 -12   3   -0.34    0.56 
  -3 -13   3    0.99    0.74 
  -2 -13   3    0.67    0.61 
  -2 -13   3    1.07    0.71 
   2 -13  -3    0.63    0.65 
  -1 -13   3   -0.42    0.59 
   1 -13  -3   -0.22    0.67 
   0 -13   3    0.22    0.62 
   0 -13  -3    0.76    0.69 
  -1 -13  -3    0.17    0.71 
   1 -13   3   -0.03    0.61 
  -2 -13  -3   -0.67    0.66 
   2 -13   3   -1.02    0.63 
 -17   0   4    0.69    0.60 
 -16   0   4    0.00    0.58 
  15   0  -4    0.04    0.38 
 -15   0   4    0.58    0.52 
  14   0  -4   11.40    0.56 
 -14   0   4   12.29    0.77 
 -13   0   4    0.66    0.47 
  13   0  -4   -0.10    0.32 
  12   0  -4   46.05    1.04 
 -12   0   4   43.29    1.27 
 -11   0   4    0.05    0.38 
  11   0  -4    0.04    0.26 
 -10   0   4   17.34    0.48 
 -10   0   4   16.66    0.64 
  10   0  -4   16.60    0.51 
   9   0  -4    0.05    0.20 
  -9   0   4    0.37    0.32 
  -9   0   4    0.17    0.18 
   8   0  -4    3.14    0.22 
  -8   0   4    3.05    0.32 
  -8   0   4    3.15    0.24 
  -7   0   4    0.02    0.14 
   7   0  -4   -0.05    0.16 
  -7   0   4    0.20    0.25 
  -6   0   4   68.18    1.63 
   6   0  -4   70.77    1.37 
  -6   0   4   68.17    1.46 
   5   0  -4   -0.01    0.12 
  -5   0   4   -0.17    0.11 
  -5   0   4   -0.11    0.19 
   4   0  -4   40.96    0.82 
  -4   0   4   39.79    0.97 
  -3   0   4   -0.15    0.13 
  -3   0   4    0.33    0.09 
  -2   0   4  207.03    3.91 
  -2   0   4  206.54    4.57 
  -1   0   4   -0.02    0.07 
  -1   0   4    0.09    0.09 
   0   0   4   78.99    1.53 
   0   0   4   81.09    1.78 
   1   0   4   -0.08    0.07 
   1   0   4   -0.02    0.08 
   2   0   4 1000.00   22.45 
   2   0   4  981.40   18.66 
   3   0   4    0.01    0.09 
   3   0   4    0.06    0.11 
   4   0   4  142.23    2.71 
   5   0   4    0.05    0.11 
  -6   0  -4  126.69    2.67 
   6   0   4  127.78    2.45 
   7   0   4   -0.14    0.14 
  -7   0  -4    0.20    0.20 
  -8   0  -4    2.43    0.23 
   8   0   4    2.14    0.19 
   9   0   4    0.11    0.21 
  -9   0  -4    0.06    0.22 
  -9   0  -4    0.24    0.26 
 -10   0  -4    0.35    0.25 
  10   0   4    0.18    0.23 
 -10   0  -4    0.17    0.30 
 -11   0  -4    0.75    0.32 
  11   0   4    0.28    0.27 
 -11   0  -4    0.27    0.30 
 -12   0  -4   31.62    0.95 
 -12   0  -4   33.50    0.90 
  12   0   4   34.10    0.84 
  13   0   4    0.29    0.31 
 -13   0  -4    0.00    0.35 
 -13   0  -4    0.63    0.39 
 -14   0  -4    3.54    0.50 
  14   0   4    2.67    0.37 
 -14   0  -4    3.64    0.42 
 -15   0  -4    0.35    0.42 
  15   0   4   -0.47    0.37 
 -15   0  -4    0.34    0.47 
  16   0   4    0.73    0.41 
 -16   0  -4    1.03    0.52 
  17   0   4    0.09    0.46 
 -17   0  -4    0.04    0.55 
 -17  -1   4    1.40    0.58 
  17  -1  -4    0.16    0.48 
 -17   1   4    0.58    0.60 
 -16  -1   4    0.81    0.55 
  16  -1  -4   -0.27    0.41 
 -16   1   4   -0.27    0.56 
 -15  -1   4    2.17    0.55 
  15  -1  -4    1.67    0.40 
 -15   1   4    2.25    0.56 
  14  -1  -4    0.10    0.35 
 -14  -1   4    0.52    0.49 
  14   1  -4   -0.16    0.34 
 -14   1   4    0.96    0.51 
 -13  -1   4    0.26    0.46 
  13  -1  -4    0.02    0.34 
  13   1  -4    0.16    0.29 
 -13   1   4   -0.15    0.40 
 -12  -1   4    3.02    0.48 
 -12  -1   4    3.50    0.33 
  12  -1  -4    3.04    0.34 
  12   1  -4    3.34    0.30 
 -12   1   4    2.96    0.46 
 -11  -1   4   15.12    0.53 
  11  -1  -4   14.98    0.55 
 -11  -1   4   16.21    0.73 
 -11   1   4   15.21    0.70 
  11   1  -4   17.00    0.54 
 -10  -1   4    8.34    0.59 
 -10  -1   4    9.45    0.40 
  10  -1  -4    9.05    0.47 
 -10   1   4    8.97    0.55 
  10   1  -4    8.64    0.40 
  -9  -1   4    4.00    0.36 
  -9  -1   4    3.35    0.25 
   9  -1  -4    3.47    0.27 
  -9   1   4    3.11    0.35 
   9   1  -4    3.17    0.22 
  -9   1   4    3.65    0.22 
   8  -1  -4    5.58    0.33 
  -8  -1   4    5.69    0.48 
  -8  -1   4    4.94    0.30 
  -8   1   4    4.98    0.21 
  -8   1   4    5.08    0.38 
   8   1  -4    5.72    0.31 
  -7  -1   4   79.25    1.68 
   7  -1  -4   77.64    1.57 
  -7  -1   4   80.92    1.88 
  -7   1   4   76.02    1.83 
   7   1  -4   80.74    1.55 
  -6  -1   4   76.51    1.62 
  -6  -1   4   75.71    1.79 
   6  -1  -4   75.58    1.51 
  -6   1   4   75.59    1.77 
   6   1  -4   76.90    1.48 
   5  -1  -4   13.80    0.38 
  -5  -1   4   12.48    0.48 
  -5  -1   4   13.44    0.38 
   5   1  -4   13.27    0.33 
  -5   1   4   13.53    0.42 
  -4  -1   4  172.17    3.47 
  -4  -1   4  164.88    3.74 
  -4  -1   4  170.11    3.17 
   4  -1  -4  168.91    3.19 
  -4   1   4  166.49    3.72 
   4   1  -4  160.81    3.16 
  -3  -1   4    0.26    0.14 
  -3  -1   4    0.28    0.08 
   3  -1  -4    0.21    0.11 
  -3   1   4    0.33    0.13 
  -2  -1   4   24.67    0.49 
  -2  -1   4   24.69    0.60 
  -2   1   4   25.07    0.52 
  -2   1   4   23.36    0.60 
  -1  -1   4   90.06    1.75 
  -1  -1   4   93.64    2.06 
  -1   1   4   95.48    1.77 
  -1   1   4   89.08    2.05 
   0  -1   4   23.30    0.48 
   0  -1   4   24.16    0.57 
   0   1   4   23.38    0.54 
   0   1   4   23.72    0.49 
   1  -1   4  109.40    2.41 
   1  -1   4  106.00    2.06 
   1   1   4  109.24    2.38 
   1   1   4  108.87    2.07 
   2  -1   4   12.37    0.33 
   2  -1   4   12.05    0.28 
  -2  -1  -4   12.63    0.32 
   2   1   4   11.90    0.30 
   3  -1   4    4.74    0.20 
  -3  -1  -4    4.99    0.25 
   3  -1   4    4.77    0.22 
   3   1   4    4.77    0.20 
  -4  -1  -4   71.20    1.47 
   4  -1   4   67.12    1.34 
   4  -1   4   67.71    1.55 
   4   1   4   67.58    1.33 
   5  -1   4   65.16    1.28 
  -5  -1  -4   64.08    1.39 
   5   1   4   64.55    1.27 
   6  -1   4   18.13    0.47 
  -6  -1  -4   18.33    0.51 
  -6  -1  -4   18.42    0.51 
   6   1   4   17.92    0.45 
   7  -1   4    7.33    0.34 
  -7  -1  -4    8.09    0.37 
  -7  -1  -4    8.14    0.38 
   7   1   4    8.17    0.32 
  -8  -1  -4    1.35    0.22 
   8  -1   4    0.86    0.20 
  -8  -1  -4    1.36    0.23 
  -8   1  -4    1.20    0.22 
   8   1   4    1.37    0.19 
  -9  -1  -4    9.74    0.48 
  -9  -1  -4    9.74    0.48 
   9  -1   4    9.54    0.42 
   9   1   4    9.33    0.39 
  -9   1  -4   10.21    0.46 
 -10  -1  -4   21.29    0.65 
 -10  -1  -4   21.73    0.69 
  10  -1   4   22.07    0.59 
 -10   1  -4   22.37    0.63 
  10   1   4   22.47    0.62 
 -11  -1  -4   32.39    0.97 
  11  -1   4   34.66    0.84 
 -11  -1  -4   33.32    0.91 
  11   1   4   33.06    0.81 
 -11   1  -4   33.69    0.88 
 -11   1  -4   34.88    0.99 
 -12  -1  -4    6.95    0.58 
 -12  -1  -4    5.29    0.41 
  12  -1   4    6.75    0.48 
  12   1   4    5.60    0.35 
 -12   1  -4    5.87    0.47 
 -12   1  -4    5.56    0.39 
 -13  -1  -4    0.74    0.43 
 -13  -1  -4    0.33    0.38 
  13  -1   4    0.37    0.33 
 -13   1  -4    0.59    0.42 
 -13   1  -4    0.70    0.34 
  13   1   4    0.70    0.33 
 -14  -1  -4    1.51    0.41 
 -14  -1  -4    0.93    0.45 
  14  -1   4    1.02    0.37 
 -14   1  -4    1.14    0.39 
  14   1   4    0.76    0.33 
 -14   1  -4    0.86    0.46 
  15  -1   4    0.90    0.39 
 -15  -1  -4    0.03    0.44 
 -15  -1  -4    0.87    0.49 
  15   1   4    0.12    0.36 
 -15   1  -4    0.82    0.47 
  16  -1   4   -0.04    0.42 
 -16  -1  -4    0.80    0.51 
 -16   1  -4    0.17    0.55 
  16   1   4    0.37    0.38 
 -17  -1  -4    1.19    0.60 
  17  -1   4   -0.37    0.45 
  17   1   4    0.20    0.44 
 -17   1  -4    0.41    0.60 
  17  -2  -4    0.30    0.48 
 -17  -2   4    1.50    0.59 
 -17   2   4    0.61    0.61 
 -16  -2   4    1.20    0.56 
  16  -2  -4    0.05    0.47 
 -16   2   4    0.33    0.57 
 -15  -2   4    2.71    0.55 
  15  -2  -4    1.63    0.44 
 -15   2   4    1.63    0.56 
 -14  -2   4    1.87    0.52 
  14  -2  -4    0.60    0.38 
 -14   2   4    1.32    0.53 
  13  -2  -4   17.11    0.65 
 -13  -2   4   17.42    0.82 
 -13   2   4   17.52    0.81 
  12  -2  -4    4.20    0.37 
 -12  -2   4    3.97    0.37 
 -12  -2   4    4.62    0.51 
 -12   2   4    4.74    0.48 
  12   2  -4    4.84    0.30 
 -11  -2   4    8.72    0.64 
 -11  -2   4    8.08    0.45 
  11  -2  -4    8.34    0.49 
 -11   2   4    9.12    0.61 
  11   2  -4    8.18    0.42 
 -10  -2   4    4.22    0.45 
  10  -2  -4    2.90    0.30 
 -10  -2   4    3.44    0.30 
 -10   2   4    3.31    0.38 
  10   2  -4    3.88    0.24 
  -9  -2   4    4.31    0.29 
   9  -2  -4    4.72    0.30 
  -9  -2   4    5.38    0.44 
   9   2  -4    5.15    0.32 
  -9   2   4    5.25    0.41 
   8  -2  -4   22.19    0.60 
  -8  -2   4   21.65    0.62 
  -8  -2   4   22.63    0.77 
  -8   2   4   22.05    0.69 
   8   2  -4   22.93    0.52 
   7  -2  -4    7.09    0.37 
  -7  -2   4    7.40    0.35 
  -7  -2   4    7.19    0.50 
  -7   2   4    7.43    0.40 
   7   2  -4    7.45    0.28 
  -6  -2   4   11.98    0.39 
  -6  -2   4   10.74    0.51 
   6  -2  -4   11.17    0.39 
   6   2  -4   11.25    0.30 
  -6   2   4   11.22    0.42 
  -5  -2   4    0.65    0.09 
  -5  -2   4    0.31    0.17 
  -5  -2   4    0.17    0.23 
   5  -2  -4    0.48    0.17 
  -5   2   4    0.70    0.18 
  -4  -2   4    0.31    0.20 
  -4  -2   4    0.41    0.15 
   4  -2  -4    0.22    0.15 
  -4  -2   4    0.40    0.07 
  -4   2   4    0.52    0.15 
  -3  -2   4  107.33    2.35 
   3  -2  -4  101.77    2.14 
   3  -2  -4  102.62    2.01 
  -3  -2   4  104.58    1.96 
  -3  -2   4  104.30    2.19 
  -3   2   4  101.60    2.32 
   2  -2  -4  126.17    2.62 
  -2  -2   4  124.29    2.39 
  -2  -2   4  128.52    2.84 
   2  -2  -4  124.58    2.43 
  -2  -2   4  128.62    2.65 
  -2   2   4  126.76    2.81 
  -2   2   4  127.82    2.43 
   1  -2  -4    3.23    0.18 
  -1  -2   4    3.14    0.20 
  -1  -2   4    3.21    0.13 
  -1   2   4    3.01    0.17 
  -1   2   4    3.32    0.16 
   0  -2   4  103.05    2.02 
   0  -2   4  108.47    2.38 
   0  -2  -4  106.78    2.22 
   0   2   4  105.46    2.34 
   0   2   4  108.21    2.04 
   1  -2   4  264.14    5.08 
   1  -2   4  268.02    5.91 
  -1  -2  -4  268.64    5.53 
   1   2   4  270.51    5.06 
   2  -2   4    1.29    0.15 
   2  -2   4    1.10    0.10 
  -2  -2  -4    1.03    0.13 
   2   2   4    0.94    0.11 
  -3  -2  -4   30.99    0.75 
   3  -2   4   32.43    0.66 
   3  -2   4   33.00    0.78 
  -3  -2  -4   32.63    0.75 
   3   2   4   32.28    0.66 
  -4  -2  -4    0.68    0.13 
   4  -2   4    0.78    0.13 
   4  -2   4    0.99    0.19 
  -4  -2  -4    1.00    0.16 
   4   2   4    0.90    0.12 
   5  -2   4   55.21    1.12 
  -5  -2  -4   55.75    1.23 
  -5  -2  -4   54.82    1.29 
   5   2   4   56.10    1.10 
   6  -2   4   23.07    0.54 
  -6  -2  -4   23.29    0.64 
  -6  -2  -4   22.39    0.59 
   6   2   4   23.29    0.53 
   7  -2   4   33.22    0.74 
  -7  -2  -4   33.42    0.86 
  -7  -2  -4   32.96    0.82 
   7   2   4   33.27    0.72 
   8  -2   4    3.57    0.25 
  -8  -2  -4    4.61    0.32 
  -8  -2  -4    3.49    0.28 
   8   2   4    3.26    0.23 
  -9  -2  -4    4.44    0.35 
   9  -2   4    4.13    0.29 
  -9  -2  -4    3.99    0.32 
   9   2   4    3.62    0.25 
 -10  -2  -4   -0.21    0.29 
 -10  -2  -4    0.28    0.31 
  10  -2   4   -0.10    0.26 
  10   2   4   -0.14    0.22 
 -10   2  -4    0.05    0.25 
  11  -2   4   11.19    0.52 
 -11  -2  -4   11.18    0.63 
 -11  -2  -4   10.46    0.55 
 -11   2  -4   11.26    0.53 
  11   2   4   10.40    0.48 
  12  -2   4    6.14    0.39 
 -12  -2  -4    7.46    0.62 
 -12  -2  -4    6.14    0.44 
 -12   2  -4    6.27    0.49 
  12   2   4    6.17    0.42 
 -12   2  -4    7.36    0.58 
 -13  -2  -4    8.62    0.63 
  13  -2   4    7.58    0.54 
 -13  -2  -4    7.24    0.49 
 -13   2  -4    8.53    0.54 
 -13   2  -4    8.48    0.67 
  13   2   4    8.35    0.52 
  14  -2   4    1.50    0.38 
 -14  -2  -4    1.89    0.50 
 -14  -2  -4    1.42    0.42 
  14   2   4    1.33    0.35 
 -14   2  -4    2.21    0.50 
 -15  -2  -4    0.52    0.49 
 -15  -2  -4    0.46    0.47 
  15  -2   4    0.11    0.40 
  15   2   4   -0.16    0.36 
 -15   2  -4    0.24    0.52 
 -16  -2  -4    1.04    0.57 
 -16  -2  -4   -0.49    0.50 
  16  -2   4    0.40    0.44 
  16   2   4    0.68    0.38 
 -16   2  -4    0.22    0.51 
  17  -2   4   -0.37    0.46 
 -17  -2  -4    0.81    0.59 
 -17   2  -4    1.03    0.59 
  17  -3  -4   -0.49    0.49 
 -17  -3   4    1.25    0.61 
 -17   3   4    0.99    0.64 
  16  -3  -4    2.12    0.49 
 -16  -3   4    3.73    0.65 
 -16   3   4    2.49    0.63 
 -15  -3   4    1.29    0.55 
  15  -3  -4    0.41    0.44 
 -15   3   4    0.69    0.55 
  14  -3  -4    5.37    0.47 
 -14  -3   4    6.87    0.63 
 -14   3   4    5.92    0.60 
 -13  -3   4    0.67    0.51 
  13  -3  -4    0.80    0.37 
 -13  -3   4    0.24    0.38 
 -13   3   4   -0.01    0.42 
 -12  -3   4    0.57    0.36 
  12  -3  -4    0.55    0.35 
 -12  -3   4    1.15    0.49 
 -12   3   4    0.98    0.44 
 -11  -3   4    7.94    0.66 
 -11  -3   4    6.68    0.49 
  11  -3  -4    6.16    0.40 
 -11   3   4    7.10    0.51 
  10  -3  -4    2.98    0.32 
 -10  -3   4    4.32    0.48 
 -10  -3   4    3.38    0.34 
  10   3  -4    3.07    0.21 
 -10   3   4    3.34    0.39 
  -9  -3   4    0.66    0.40 
  -9  -3   4    0.65    0.29 
   9  -3  -4    0.76    0.24 
  -9   3   4    0.75    0.33 
   9   3  -4    0.65    0.16 
  -8  -3   4    1.16    0.28 
  -8  -3   4    1.13    0.33 
   8  -3  -4    1.14    0.26 
  -8   3   4    1.49    0.29 
   8   3  -4    1.43    0.14 
  -7  -3   4   11.47    0.59 
   7  -3  -4   12.43    0.46 
  -7  -3   4   12.05    0.46 
   7   3  -4   11.77    0.30 
  -7   3   4   11.98    0.48 
  -6  -3   4   18.26    0.53 
   6  -3  -4   18.76    0.50 
  -6  -3   4   18.19    0.65 
  -6  -3   4   18.02    0.38 
  -6   3   4   18.36    0.56 
   5  -3  -4   42.19    0.91 
  -5  -3   4   41.61    1.06 
  -5  -3   4   41.90    0.97 
  -5   3   4   41.49    1.00 
  -4  -3   4   19.17    0.51 
  -4  -3   4   18.87    0.54 
   4  -3  -4   17.62    0.47 
   4  -3  -4   17.69    0.41 
  -3  -3   4  103.94    2.17 
   3  -3  -4  101.12    1.99 
  -3  -3   4  102.74    2.32 
   3  -3  -4  100.51    2.12 
  -2  -3   4   31.56    0.74 
   2  -3  -4   30.38    0.69 
  -2  -3   4   30.20    0.60 
  -2  -3   4   31.37    0.77 
  -2   3   4   30.39    0.68 
  -1  -3   4    6.89    0.19 
   1  -3  -4    7.09    0.26 
  -1  -3   4    6.96    0.29 
  -1   3   4    7.22    0.28 
   0  -3  -4   54.31    1.17 
   0  -3   4   53.11    1.05 
   0  -3   4   54.96    1.26 
   0   3   4   54.80    1.09 
   1  -3   4    1.94    0.17 
  -1  -3  -4    1.80    0.16 
   1  -3   4    1.83    0.12 
   1   3   4    1.82    0.14 
  -2  -3  -4    6.40    0.30 
   2  -3   4    6.46    0.24 
   2  -3   4    6.73    0.29 
   2   3   4    6.63    0.24 
   3  -3   4   11.59    0.38 
   3  -3   4   11.11    0.33 
  -3  -3  -4   11.35    0.40 
  -3  -3  -4   11.72    0.29 
   3   3   4   11.24    0.32 
   4  -3   4   85.32    1.69 
  -4  -3  -4   84.62    1.85 
  -4  -3  -4   88.51    1.93 
   4  -3   4   85.26    1.96 
   4   3   4   86.42    1.67 
  -5  -3  -4    9.74    0.41 
  -5  -3  -4    8.60    0.38 
   5  -3   4    9.68    0.35 
   5  -3   4    9.45    0.39 
   5   3   4    9.24    0.30 
  -6  -3  -4  115.02    2.50 
  -6  -3  -4  116.64    2.67 
   6  -3   4  117.35    2.29 
   6   3   4  120.21    2.26 
  -7  -3  -4    0.07    0.24 
   7  -3   4   -0.03    0.20 
  -7  -3  -4   -1.01    0.25 
   7   3   4    0.05    0.17 
  -8  -3  -4    1.87    0.29 
   8  -3   4    2.25    0.23 
  -8  -3  -4    1.61    0.31 
   8   3   4    1.79    0.21 
  -9  -3  -4   14.61    0.58 
  -9  -3  -4   14.32    0.66 
   9  -3   4   14.56    0.53 
   9   3   4   13.94    0.44 
  10  -3   4   11.25    0.52 
 -10  -3  -4   10.98    0.56 
 -10  -3  -4   11.56    0.63 
  10   3   4   10.91    0.45 
 -11  -3  -4    4.15    0.45 
 -11  -3  -4    3.04    0.40 
  11  -3   4    2.66    0.31 
 -11   3  -4    3.34    0.32 
  11   3   4    2.67    0.28 
 -12  -3  -4    0.35    0.37 
  12  -3   4    0.31    0.34 
 -12  -3  -4    0.73    0.44 
  12   3   4    0.47    0.26 
 -12   3  -4    0.52    0.33 
  13  -3   4    0.89    0.38 
 -13  -3  -4    1.16    0.48 
 -13  -3  -4    0.83    0.41 
  13   3   4    0.47    0.31 
 -14  -3  -4    1.27    0.45 
  14  -3   4    1.48    0.41 
 -14  -3  -4    2.40    0.52 
  14   3   4    1.14    0.34 
 -14   3  -4    1.42    0.51 
 -15  -3  -4    1.35    0.55 
 -15  -3  -4   -0.29    0.46 
  15  -3   4    0.66    0.43 
 -15   3  -4   -0.38    0.55 
 -16  -3  -4    0.71    0.54 
  16  -3   4    0.71    0.46 
 -16  -3  -4    1.08    0.58 
 -16   3  -4   -0.04    0.59 
  17  -3   4    0.10    0.49 
 -17   3  -4   -0.67    0.57 
  16  -4  -4   -0.11    0.49 
 -16  -4   4    1.08    0.65 
 -16   4   4   -0.47    0.64 
 -15  -4   4    2.52    0.62 
  15  -4  -4    1.05    0.47 
 -15   4   4    1.38    0.59 
 -14  -4   4    1.35    0.49 
 -14  -4   4    3.12    0.61 
  14  -4  -4    1.97    0.45 
 -14   4   4    1.62    0.55 
 -13  -4   4    0.85    0.55 
  13  -4  -4    0.11    0.40 
 -13  -4   4    0.22    0.42 
 -13   4   4    0.05    0.49 
 -12  -4   4    1.80    0.41 
  12  -4  -4    1.38    0.39 
 -12  -4   4    2.71    0.55 
 -12   4   4    1.58    0.47 
  11  -4  -4    5.94    0.42 
 -11  -4   4    6.21    0.50 
 -11  -4   4    6.15    0.58 
 -11   4   4    6.37    0.50 
  10  -4  -4    2.49    0.35 
 -10  -4   4    2.43    0.49 
 -10  -4   4    3.02    0.36 
 -10   4   4    2.55    0.41 
  -9  -4   4   35.91    0.93 
  -9  -4   4   33.89    1.10 
   9  -4  -4   36.15    0.88 
  -9   4   4   37.46    1.01 
  -8  -4   4   26.07    0.75 
   8  -4  -4   24.69    0.68 
  -8  -4   4   24.41    0.87 
  -8   4   4   25.83    0.76 
   7  -4  -4   42.92    0.99 
  -7  -4   4   41.90    1.15 
  -7  -4   4   42.71    1.03 
  -7   4   4   43.18    1.08 
   6  -4  -4   32.69    0.80 
  -6  -4   4   31.87    0.83 
  -6  -4   4   33.54    0.92 
  -5  -4   4    0.42    0.24 
   5  -4  -4    0.54    0.22 
  -5  -4   4    0.83    0.27 
  -4  -4   4   10.76    0.43 
  -4  -4   4    9.83    0.42 
   4  -4  -4   10.22    0.41 
   4  -4  -4    9.63    0.30 
  -3  -4   4    0.72    0.23 
   3  -4  -4    0.94    0.15 
  -3  -4   4    0.45    0.23 
   3  -4  -4    0.71    0.18 
  -2  -4   4   27.13    0.55 
   2  -4  -4   27.88    0.66 
   2  -4  -4   26.95    0.65 
  -2  -4   4   27.72    0.71 
  -1  -4   4    0.58    0.18 
  -1  -4   4    0.43    0.09 
   1  -4  -4    0.58    0.16 
  -1  -4   4    0.78    0.22 
  -1   4   4    0.78    0.16 
   0  -4   4   -0.13    0.17 
   0  -4  -4   -0.01    0.16 
   0  -4   4    0.03    0.10 
   0   4   4   -0.19    0.14 
  -1  -4  -4   12.91    0.42 
   1  -4   4   12.01    0.34 
   1  -4   4   12.56    0.42 
  -1  -4  -4   12.49    0.33 
   1   4   4   12.73    0.36 
   2  -4   4    9.42    0.35 
  -2  -4  -4    9.66    0.39 
  -2  -4  -4    9.72    0.26 
   2  -4   4    9.56    0.30 
   2   4   4    9.34    0.31 
   3  -4   4    0.04    0.21 
   3  -4   4    0.28    0.14 
  -3  -4  -4    0.13    0.20 
  -3  -4  -4    0.08    0.11 
   3   4   4    0.04    0.14 
   4  -4   4   24.04    0.66 
  -4  -4  -4   23.73    0.57 
   4  -4   4   23.43    0.57 
  -4  -4  -4   23.34    0.63 
   4   4   4   23.67    0.53 
  -5  -4  -4    1.89    0.26 
   5  -4   4    2.53    0.28 
   5  -4   4    1.71    0.19 
  -5  -4  -4    2.23    0.19 
   5   4   4    1.99    0.17 
   6  -4   4    1.32    0.27 
   6  -4   4    0.98    0.19 
  -6  -4  -4    1.09    0.26 
  -6  -4  -4    0.73    0.22 
   6   4   4    1.14    0.17 
   7  -4   4   29.92    0.73 
  -7  -4  -4   31.78    0.88 
  -7  -4  -4   30.30    0.84 
   7   4   4   31.25    0.69 
  -8  -4  -4   16.47    0.68 
   8  -4   4   18.80    0.59 
  -8  -4  -4   17.37    0.64 
   8   4   4   17.77    0.48 
   9  -4   4    1.50    0.29 
  -9  -4  -4    1.26    0.34 
  -9  -4  -4    0.37    0.38 
   9   4   4    1.15    0.22 
  10  -4   4    0.52    0.31 
 -10  -4  -4    0.82    0.35 
 -10  -4  -4   -0.38    0.42 
  10   4   4    1.11    0.23 
  11  -4   4    0.31    0.33 
 -11  -4  -4    0.24    0.38 
 -11  -4  -4   -0.71    0.42 
  11   4   4    0.07    0.25 
  12  -4   4    3.34    0.39 
 -12  -4  -4    3.53    0.44 
 -12  -4  -4    3.36    0.54 
  12   4   4    3.11    0.30 
  13  -4   4    3.18    0.42 
 -13  -4  -4    3.00    0.47 
 -13  -4  -4    3.74    0.58 
  13   4   4    2.47    0.32 
  14  -4   4    1.89    0.44 
 -14  -4  -4    1.59    0.51 
 -14  -4  -4    2.66    0.56 
 -15  -4  -4    0.75    0.50 
  15  -4   4    0.32    0.45 
 -15   4  -4    0.30    0.58 
 -16  -4  -4   -0.15    0.52 
  16  -4   4   -0.07    0.47 
 -16   4  -4   -0.25    0.63 
 -16  -5   4    1.84    0.70 
  16  -5  -4    0.78    0.55 
 -16   5   4    0.34    0.65 
  15  -5  -4    3.76    0.54 
 -15  -5   4    4.29    0.72 
 -15   5   4    2.88    0.63 
 -14  -5   4    0.37    0.61 
  14  -5  -4   -0.51    0.46 
 -14  -5   4   -0.24    0.49 
 -14   5   4   -0.08    0.55 
 -13  -5   4    0.55    0.59 
 -13  -5   4    0.37    0.47 
  13  -5  -4    1.09    0.44 
 -13   5   4    1.04    0.54 
  12  -5  -4    1.94    0.43 
 -12  -5   4    1.77    0.62 
 -12  -5   4    2.51    0.44 
 -12   5   4    3.12    0.53 
 -11  -5   4    0.61    0.42 
  11  -5  -4    1.24    0.39 
 -11  -5   4    0.26    0.53 
 -11   5   4    1.26    0.45 
  10  -5  -4    0.97    0.36 
 -10  -5   4    1.46    0.38 
 -10  -5   4    1.63    0.50 
 -10   5   4    1.58    0.42 
  -9  -5   4    7.35    0.57 
   9  -5  -4    6.53    0.42 
  -9  -5   4    6.49    0.50 
  -9   5   4    6.64    0.52 
   8  -5  -4    3.52    0.35 
  -8  -5   4    3.45    0.36 
  -8  -5   4    3.69    0.47 
  -7  -5   4    0.02    0.32 
  -7  -5   4   -0.27    0.36 
   7  -5  -4    0.01    0.28 
  -6  -5   4    3.56    0.33 
   6  -5  -4    3.67    0.29 
  -6  -5   4    3.76    0.39 
   5  -5  -4    1.53    0.27 
   5  -5  -4    2.04    0.18 
  -5  -5   4    1.56    0.29 
  -5  -5   4    1.88    0.32 
   4  -5  -4    7.06    0.37 
   4  -5  -4    7.31    0.32 
  -4  -5   4    7.46    0.41 
  -4  -5   4    6.98    0.44 
   3  -5  -4   54.85    1.17 
  -3  -5   4   54.46    1.32 
  -3  -5   4   55.87    1.27 
   3  -5  -4   53.97    1.20 
   2  -5  -4    3.52    0.24 
  -2  -5   4    3.39    0.30 
  -2  -5   4    3.03    0.28 
  -2  -5   4    2.79    0.19 
   2  -5  -4    3.72    0.27 
  -2   5   4    2.96    0.23 
  -1  -5   4   31.15    0.66 
   1  -5  -4   32.38    0.77 
  -1  -5   4   31.46    0.82 
  -1  -5   4   31.52    0.83 
  -1   5   4   32.51    0.73 
   0  -5   4    1.37    0.25 
   0  -5   4    2.12    0.16 
   0  -5  -4    1.93    0.18 
   0  -5  -4    2.05    0.22 
   0   5   4    1.89    0.19 
   1  -5   4   49.67    1.22 
  -1  -5  -4   50.49    1.17 
   1  -5   4   49.74    1.02 
  -1  -5  -4   50.52    1.14 
   1   5   4   50.42    1.04 
  -2  -5  -4    0.25    0.23 
   2  -5   4    0.34    0.24 
  -2  -5  -4    0.55    0.14 
   2  -5   4    0.19    0.16 
   2   5   4    0.36    0.16 
   3  -5   4    0.26    0.17 
   3  -5   4   -0.34    0.25 
  -3  -5  -4    0.05    0.14 
  -3  -5  -4    0.09    0.24 
   3   5   4    0.02    0.16 
   4  -5   4    4.93    0.35 
   4  -5   4    5.11    0.38 
  -4  -5  -4    4.90    0.38 
  -4  -5  -4    5.93    0.26 
   4   5   4    5.47    0.28 
  -5  -5  -4   32.44    0.87 
   5  -5   4   32.26    0.77 
   5  -5   4   32.72    0.88 
  -5  -5  -4   32.10    0.79 
   5   5   4   33.44    0.72 
  -6  -5  -4   -0.18    0.20 
   6  -5   4    0.12    0.32 
   6  -5   4    0.29    0.23 
  -6  -5  -4    0.10    0.29 
   6   5   4   -0.22    0.17 
  -7  -5  -4    5.87    0.37 
  -7  -5  -4    6.00    0.39 
   7  -5   4    6.07    0.33 
   7   5   4    5.92    0.32 
   8  -5   4    0.98    0.26 
  -8  -5  -4    0.88    0.32 
  -8  -5  -4    1.04    0.34 
   8   5   4    1.13    0.21 
  -9  -5  -4    2.56    0.40 
   9  -5   4    2.87    0.31 
  -9  -5  -4    2.97    0.39 
   9   5   4    2.76    0.25 
 -10  -5  -4    1.51    0.43 
 -10  -5  -4    2.08    0.41 
  10  -5   4    1.88    0.32 
  10   5   4    2.26    0.26 
 -11  -5  -4    0.32    0.49 
 -11  -5  -4    0.89    0.42 
  11  -5   4    1.22    0.38 
  11   5   4    1.46    0.26 
 -12  -5  -4    1.38    0.45 
 -12  -5  -4   -1.06    0.52 
  12  -5   4    1.20    0.36 
  13  -5   4    0.19    0.41 
 -13  -5  -4    0.32    0.47 
 -14  -5  -4    0.35    0.50 
  14  -5   4    0.41    0.45 
 -15  -5  -4    1.55    0.55 
  15  -5   4    1.85    0.49 
 -16  -5  -4   -0.43    0.59 
  16  -5   4    0.26    0.50 
 -16   5  -4    1.02    0.68 
 -15  -6   4   -0.17    0.56 
  15  -6  -4    0.54    0.52 
 -15  -6   4    0.82    0.75 
 -15   6   4   -0.18    0.63 
 -14  -6   4    0.51    0.71 
  14  -6  -4    0.06    0.49 
 -14  -6   4   -0.31    0.54 
 -14   6   4    0.06    0.63 
 -13  -6   4    0.31    0.68 
  13  -6  -4    0.75    0.46 
 -13  -6   4    0.11    0.51 
 -13   6   4    0.66    0.56 
  12  -6  -4   -0.29    0.39 
 -12  -6   4   -0.62    0.63 
 -12  -6   4    0.18    0.45 
 -12   6   4   -0.04    0.53 
 -11  -6   4    0.14    0.56 
 -11  -6   4    0.44    0.46 
  11  -6  -4   -0.45    0.40 
 -11   6   4    0.23    0.47 
 -10  -6   4    2.02    0.43 
 -10  -6   4    1.51    0.59 
  10  -6  -4    1.08    0.36 
 -10   6   4    2.41    0.45 
  -9  -6   4   14.47    0.81 
  -9  -6   4   13.42    0.65 
   9  -6  -4   15.27    0.66 
  -8  -6   4    1.42    0.38 
   8  -6  -4    1.26    0.35 
  -8  -6   4    0.80    0.44 
  -7  -6   4    9.26    0.55 
  -7  -6   4    8.69    0.56 
   7  -6  -4    8.46    0.50 
  -6  -6   4    6.99    0.53 
   6  -6  -4    6.72    0.40 
  -6  -6   4    7.21    0.50 
  -5  -6   4    0.27    0.32 
   5  -6  -4    0.37    0.29 
   5  -6  -4    0.09    0.22 
  -5  -6   4    0.11    0.33 
   4  -6  -4   14.08    0.51 
  -4  -6   4   14.62    0.59 
   4  -6  -4   13.85    0.45 
  -4  -6   4   13.44    0.54 
   3  -6  -4   14.19    0.49 
  -3  -6   4   13.88    0.34 
  -3  -6   4   14.00    0.53 
   3  -6  -4   13.57    0.47 
  -3  -6   4   14.02    0.53 
  -2  -6   4    1.99    0.16 
  -2  -6   4    1.89    0.30 
   2  -6  -4    1.87    0.27 
  -2  -6   4    2.08    0.33 
   2  -6  -4    1.71    0.25 
  -2   6   4    1.56    0.24 
   1  -6  -4   14.97    0.51 
  -1  -6   4   15.47    0.58 
  -1  -6   4   14.38    0.42 
  -1  -6   4   16.35    0.54 
  -1   6   4   15.93    0.51 
   0  -6   4    0.21    0.30 
   0  -6  -4    0.10    0.19 
   0  -6   4    0.76    0.25 
   0  -6  -4    0.50    0.25 
   0  -6   4   -0.01    0.16 
   0   6   4    0.05    0.20 
   1  -6   4    3.31    0.32 
  -1  -6  -4    3.33    0.25 
  -1  -6  -4    3.46    0.30 
   1  -6   4    3.54    0.22 
   1   6   4    3.31    0.23 
  -2  -6  -4    0.55    0.27 
   2  -6   4    0.77    0.18 
  -2  -6  -4    1.13    0.19 
   2  -6   4    0.44    0.26 
   2   6   4    0.55    0.19 
   3  -6   4   23.93    0.61 
   3  -6   4   23.07    0.71 
  -3  -6  -4   23.70    0.74 
  -3  -6  -4   24.27    0.61 
   3   6   4   23.41    0.59 
   4  -6   4   -0.01    0.22 
  -4  -6  -4    0.14    0.19 
   4  -6   4   -0.37    0.30 
  -4  -6  -4   -0.11    0.29 
   4   6   4   -0.10    0.18 
   5  -6   4   19.67    0.59 
  -5  -6  -4   18.61    0.53 
  -5  -6  -4   18.88    0.69 
   5  -6   4   18.83    0.65 
   5   6   4   18.44    0.51 
  -6  -6  -4   14.07    0.64 
   6  -6   4   15.09    0.58 
   6  -6   4   13.60    0.50 
  -6  -6  -4   13.25    0.46 
   6   6   4   14.31    0.44 
  -7  -6  -4    3.69    0.39 
   7  -6   4    3.65    0.33 
  -7  -6  -4    4.34    0.30 
   7   6   4    3.97    0.23 
  -8  -6  -4   20.09    0.76 
  -8  -6  -4   19.87    0.64 
   8  -6   4   20.35    0.69 
   8   6   4   20.49    0.55 
  -9  -6  -4   -0.02    0.34 
  -9  -6  -4    0.66    0.39 
   9  -6   4   -0.09    0.33 
   9   6   4    0.01    0.22 
 -10  -6  -4    0.26    0.42 
  10  -6   4    0.33    0.32 
  11  -6   4    0.30    0.39 
 -11  -6  -4    0.89    0.46 
  12  -6   4    0.43    0.41 
 -12  -6  -4    0.52    0.48 
  13  -6   4    4.62    0.49 
 -13  -6  -4    5.04    0.55 
 -14  -6  -4    0.28    0.53 
  14  -6   4    0.21    0.47 
  15  -6   4    0.64    0.51 
 -15  -6  -4   -0.12    0.60 
  15  -7  -4    0.02    0.57 
 -15  -7   4    0.72    0.82 
 -15  -7   4    0.81    0.63 
 -14  -7   4    0.54    0.56 
  14  -7  -4    0.89    0.55 
 -14  -7   4   -0.78    0.78 
 -14   7   4    0.57    0.65 
  13  -7  -4   -0.28    0.50 
 -13  -7   4    0.02    0.74 
 -13  -7   4    0.38    0.52 
 -13   7   4    0.30    0.60 
  12  -7  -4    0.69    0.48 
 -12  -7   4   -0.68    0.70 
 -12  -7   4    0.87    0.50 
 -12   7   4    1.54    0.58 
 -11  -7   4    0.11    0.66 
 -11  -7   4    0.13    0.48 
  11  -7  -4    0.30    0.45 
 -11   7   4   -0.35    0.53 
  10  -7  -4    6.08    0.47 
 -10  -7   4    6.58    0.53 
 -10  -7   4    6.98    0.68 
  -9  -7   4   -0.43    0.50 
   9  -7  -4   -0.66    0.40 
  -9  -7   4   -0.24    0.43 
  -8  -7   4    0.46    0.49 
   8  -7  -4    0.03    0.38 
  -8  -7   4    0.70    0.41 
   7  -7  -4    0.25    0.36 
  -7  -7   4    0.86    0.40 
  -7  -7   4    0.89    0.46 
  -6  -7   4    8.32    0.61 
  -6  -7   4    8.23    0.57 
   6  -7  -4    8.58    0.59 
   5  -7  -4    3.44    0.37 
   5  -7  -4    3.29    0.30 
  -5  -7   4    3.58    0.42 
  -5  -7   4    2.90    0.38 
  -4  -7   4    0.11    0.33 
  -4  -7   4   -0.11    0.33 
   4  -7  -4    0.13    0.27 
   4  -7  -4   -0.08    0.31 
   3  -7  -4    0.58    0.27 
  -3  -7   4   -0.10    0.36 
  -3  -7   4    0.24    0.32 
   3  -7  -4    0.47    0.30 
  -2  -7   4    8.19    0.36 
   2  -7  -4    8.09    0.44 
  -2  -7   4    8.21    0.55 
   2  -7  -4    7.76    0.48 
  -2  -7   4    7.55    0.46 
  -2   7   4    7.55    0.47 
  -1  -7   4    4.81    0.38 
   1  -7  -4    4.35    0.31 
  -1  -7   4    4.93    0.33 
  -1  -7   4    4.84    0.41 
   1  -7  -4    5.52    0.44 
  -1   7   4    4.63    0.30 
   0  -7   4   33.30    0.93 
   0  -7  -4   33.06    0.83 
   0  -7   4   33.91    0.77 
   0  -7   4   33.77    0.93 
   0  -7  -4   32.40    0.87 
   0   7   4   33.88    0.80 
   1  -7   4    1.57    0.23 
   1  -7   4    1.31    0.34 
  -1  -7  -4    1.77    0.32 
  -1  -7  -4    1.86    0.25 
   1   7   4    1.80    0.25 
   2  -7   4   24.05    0.63 
  -2  -7  -4   23.50    0.63 
  -2  -7  -4   24.46    0.73 
   2  -7   4   22.72    0.74 
   2   7   4   24.56    0.63 
   3  -7   4    1.31    0.26 
  -3  -7  -4    1.37    0.23 
  -3  -7  -4    0.73    0.34 
   3  -7   4    0.55    0.35 
   3   7   4    1.18    0.22 
  -4  -7  -4    1.43    0.37 
   4  -7   4    1.66    0.27 
  -4  -7  -4    1.36    0.23 
   4  -7   4    1.83    0.37 
   4   7   4    1.38    0.22 
  -5  -7  -4   14.15    0.46 
   5  -7   4   13.09    0.60 
   5  -7   4   13.43    0.56 
  -5  -7  -4   14.06    0.69 
   5   7   4   13.36    0.45 
  -6  -7  -4    7.54    0.38 
   6  -7   4    7.38    0.48 
   6  -7   4    7.74    0.52 
  -6  -7  -4    7.48    0.49 
   6   7   4    7.88    0.37 
   7  -7   4    1.35    0.43 
   7  -7   4    1.70    0.33 
  -7  -7  -4    1.30    0.41 
   7   7   4    0.81    0.22 
  -8  -7  -4    0.36    0.42 
   8  -7   4    1.27    0.35 
  -9  -7  -4    1.46    0.45 
   9  -7   4    1.49    0.38 
  10  -7   4    1.67    0.41 
 -10  -7  -4    1.12    0.48 
  11  -7   4   -0.10    0.41 
 -11  -7  -4    0.67    0.50 
  12  -7   4    1.67    0.46 
 -12  -7  -4    1.56    0.53 
 -13  -7  -4    1.03    0.60 
  13  -7   4    0.18    0.48 
 -14  -7  -4    2.30    0.63 
  14  -7   4    2.31    0.53 
  14  -8  -4    0.29    0.58 
 -14  -8   4   -0.88    0.79 
 -14  -8   4    0.03    0.61 
 -13  -8   4    0.09    0.58 
 -13  -8   4   -0.78    0.79 
  13  -8  -4    1.31    0.55 
 -13   8   4    0.17    0.66 
 -12  -8   4    0.59    0.56 
  12  -8  -4    0.45    0.48 
 -12  -8   4   -0.32    0.74 
 -12   8   4    0.03    0.60 
 -11  -8   4    0.61    0.53 
  11  -8  -4    0.13    0.50 
 -11  -8   4   -0.25    0.69 
  10  -8  -4    2.30    0.50 
 -10  -8   4    1.07    0.52 
 -10  -8   4    1.45    0.61 
  -9  -8   4   -0.33    0.49 
  -9  -8   4    0.47    0.58 
   9  -8  -4   -0.08    0.40 
  -8  -8   4    6.35    0.60 
  -8  -8   4    5.51    0.54 
   8  -8  -4    5.37    0.46 
  -7  -8   4   -0.25    0.46 
  -7  -8   4   -0.79    0.47 
   7  -8  -4    0.30    0.40 
  -6  -8   4    3.22    0.46 
   6  -8  -4    4.05    0.43 
  -6  -8   4    3.44    0.44 
   5  -8  -4    7.59    0.45 
  -5  -8   4    6.08    0.52 
  -5  -8   4    6.68    0.48 
   5  -8  -4    7.41    0.47 
  -4  -8   4    1.47    0.39 
   4  -8  -4    1.54    0.32 
   4  -8  -4    2.14    0.38 
  -4  -8   4    1.29    0.44 
  -3  -8   4    0.09    0.37 
   3  -8  -4    0.15    0.33 
   3  -8  -4    0.01    0.34 
  -3  -8   4    0.25    0.39 
  -3   8   4   -0.29    0.31 
  -2  -8   4    5.67    0.48 
  -2  -8   4    6.48    0.35 
  -2  -8   4    6.32    0.45 
   2  -8  -4    5.78    0.41 
  -2   8   4    6.02    0.38 
   1  -8  -4    0.49    0.30 
   1  -8  -4    0.43    0.35 
  -1  -8   4    0.59    0.36 
  -1  -8   4    0.74    0.24 
  -1  -8   4    0.48    0.41 
  -1   8   4    0.42    0.28 
   0  -8  -4    1.72    0.36 
   0  -8   4    2.11    0.39 
   0  -8   4    2.30    0.26 
   0  -8   4    2.01    0.42 
   0  -8  -4    1.67    0.29 
   0   8   4    1.88    0.28 
   1  -8   4   12.41    0.58 
  -1  -8  -4   13.12    0.59 
   1  -8   4   12.53    0.52 
  -1  -8  -4   12.62    0.47 
   1   8   4   12.26    0.54 
  -2  -8  -4    0.39    0.39 
   2  -8   4    0.66    0.27 
   2  -8   4    0.24    0.37 
  -2  -8  -4    0.17    0.26 
   2   8   4    0.12    0.25 
  -3  -8  -4    1.25    0.39 
   3  -8   4    1.51    0.41 
  -3  -8  -4    1.74    0.27 
   3  -8   4    1.58    0.30 
   3   8   4    1.17    0.25 
  -4  -8  -4    3.41    0.44 
   4  -8   4    3.86    0.34 
   4  -8   4    4.37    0.45 
  -4  -8  -4    3.98    0.33 
   4   8   4    3.97    0.27 
   5  -8   4   -0.09    0.31 
   5  -8   4    0.46    0.42 
  -5  -8  -4   -0.05    0.37 
   5   8   4    0.38    0.24 
   6  -8   4   13.07    0.66 
   6  -8   4   12.23    0.62 
  -6  -8  -4   12.18    0.70 
   6   8   4   12.55    0.48 
  -7  -8  -4    7.12    0.54 
   7  -8   4    7.15    0.45 
   7  -8   4    7.31    0.60 
  -8  -8  -4   -0.26    0.41 
   8  -8   4    0.28    0.38 
   9  -8   4    3.50    0.41 
  -9  -8  -4    3.50    0.48 
  10  -8   4    0.60    0.44 
 -10  -8  -4    0.14    0.51 
 -11  -8  -4    0.54    0.54 
  11  -8   4    0.34    0.46 
 -12  -8  -4    1.60    0.59 
  12  -8   4    1.60    0.51 
  13  -8   4    0.12    0.52 
 -13  -8  -4   -0.85    0.62 
 -12  -9   4    1.42    0.66 
 -12  -9   4   -0.13    0.77 
  12  -9  -4    0.33    0.57 
 -12   9   4    1.01    0.62 
 -11  -9   4    2.66    0.70 
 -11  -9   4    2.76    0.65 
  11  -9  -4    2.24    0.56 
  10  -9  -4    0.01    0.51 
 -10  -9   4    0.24    0.57 
 -10  -9   4   -0.38    0.65 
   9  -9  -4    1.12    0.49 
  -9  -9   4    1.52    0.56 
  -9  -9   4    1.01    0.58 
   8  -9  -4    1.52    0.48 
  -8  -9   4    0.57    0.54 
  -8  -9   4   -0.15    0.52 
  -7  -9   4    3.59    0.56 
  -7  -9   4    3.94    0.53 
   7  -9  -4    4.24    0.50 
  -6  -9   4    0.10    0.44 
  -6  -9   4    0.35    0.51 
   6  -9  -4    1.40    0.40 
  -5  -9   4    8.98    0.60 
   5  -9  -4   11.08    0.72 
  -5  -9   4   11.27    0.77 
  -4  -9   4   -0.16    0.44 
   4  -9  -4    0.39    0.37 
  -4  -9   4    0.02    0.48 
   4  -9  -4   -0.11    0.40 
  -3  -9   4    1.48    0.49 
   3  -9  -4    1.78    0.40 
   3  -9  -4    1.94    0.40 
  -3  -9   4    2.23    0.45 
  -3   9   4    2.18    0.38 
  -2  -9   4    1.75    0.42 
  -2  -9   4    1.21    0.48 
   2  -9  -4    1.19    0.40 
  -2   9   4    0.77    0.35 
   1  -9  -4    7.40    0.58 
   1  -9  -4    7.48    0.45 
  -1  -9   4    6.80    0.58 
  -1  -9   4    8.54    0.67 
  -1   9   4    7.23    0.41 
   0  -9   4    0.26    0.41 
   0  -9   4    0.36    0.28 
   0  -9  -4    0.28    0.33 
   0  -9  -4    0.21    0.42 
   0   9   4    0.75    0.32 
  -1  -9  -4    0.77    0.32 
   1  -9   4    0.68    0.42 
  -1  -9  -4    0.61    0.41 
   1  -9   4    0.36    0.32 
   1   9   4    0.77    0.30 
  -2  -9  -4    2.75    0.46 
   2  -9   4    2.54    0.45 
  -2  -9  -4    3.24    0.33 
   2  -9   4    3.05    0.35 
   2   9   4    2.36    0.31 
   3  -9   4    0.30    0.34 
  -3  -9  -4   -0.24    0.43 
   3  -9   4   -0.14    0.44 
   3   9   4   -0.22    0.26 
  -4  -9  -4    0.97    0.46 
   4  -9   4    2.15    0.46 
   4  -9   4    2.03    0.36 
   4   9   4    1.49    0.28 
   5  -9   4    3.16    0.50 
   5  -9   4    3.16    0.39 
  -5  -9  -4    3.48    0.51 
  -6  -9  -4   -0.33    0.47 
   6  -9   4    0.12    0.38 
   6  -9   4    0.85    0.49 
  -7  -9  -4    2.40    0.53 
   7  -9   4    2.95    0.54 
   7  -9   4    2.70    0.42 
   8  -9   4   -0.10    0.42 
  -8  -9  -4    0.30    0.46 
   9  -9   4    1.89    0.45 
  -9  -9  -4    1.99    0.56 
  10  -9   4    1.37    0.48 
 -10  -9  -4    1.34    0.57 
  11  -9   4    0.10    0.50 
 -11  -9  -4    0.33    0.59 
  12  -9   4    0.21    0.53 
 -12  -9  -4   -0.21    0.61 
 -11 -10   4   -1.65    0.72 
  11 -10  -4    0.30    0.57 
 -11 -10   4   -0.57    0.68 
 -10 -10   4    0.15    0.64 
  10 -10  -4    0.12    0.50 
 -10 -10   4    0.01    0.63 
   9 -10  -4   -0.44    0.54 
  -9 -10   4    0.00    0.60 
  -9 -10   4    0.23    0.63 
  -8 -10   4   -0.01    0.59 
   8 -10  -4    0.50    0.52 
  -8 -10   4    0.20    0.55 
  -7 -10   4   -0.57    0.56 
  -7 -10   4   -0.26    0.55 
   7 -10  -4   -0.03    0.50 
  -6 -10   4    2.08    0.59 
   6 -10  -4    3.25    0.51 
  -6 -10   4    2.31    0.55 
  -5 -10   4    0.45    0.48 
  -5 -10   4    0.01    0.54 
   5 -10  -4    1.12    0.47 
   4 -10  -4   -0.29    0.44 
  -4 -10   4   -0.25    0.54 
  -4 -10   4   -0.03    0.45 
   4 -10  -4    0.16    0.41 
  -4  10   4   -0.47    0.41 
   3 -10  -4    3.32    0.47 
  -3 -10   4    2.54    0.51 
  -3 -10   4    3.02    0.49 
  -3  10   4    2.76    0.45 
  -2 -10   4    1.75    0.55 
  -2 -10   4    1.21    0.49 
   2 -10  -4    2.66    0.48 
  -2  10   4    1.83    0.39 
  -1 -10   4   -0.26    0.51 
   1 -10  -4    0.25    0.46 
  -1 -10   4   -0.69    0.44 
  -1  10   4    0.22    0.36 
   0 -10  -4    0.52    0.45 
   0 -10   4    0.51    0.46 
   0  10   4    0.18    0.34 
  -1 -10  -4    0.29    0.47 
   1 -10   4    0.15    0.47 
   1 -10   4   -0.11    0.37 
   1  10   4   -0.03    0.31 
  -2 -10  -4    7.49    0.57 
   2 -10   4    7.52    0.61 
   2 -10   4    6.74    0.45 
   2  10   4    7.54    0.54 
  -3 -10  -4    0.17    0.49 
   3 -10   4    0.27    0.39 
   3 -10   4   -0.42    0.47 
   3  10   4    0.31    0.30 
  -4 -10  -4    1.95    0.53 
   4 -10   4    2.37    0.52 
   4 -10   4    2.77    0.41 
   5 -10   4   -0.13    0.40 
   5 -10   4   -0.01    0.52 
  -5 -10  -4    0.21    0.54 
  -6 -10  -4    0.55    0.55 
   6 -10   4    0.49    0.54 
   6 -10   4    0.27    0.43 
  -7 -10  -4    0.05    0.57 
   7 -10   4   -0.35    0.44 
   8 -10   4    1.93    0.50 
  -8 -10  -4    2.61    0.62 
  -9 -10  -4    0.12    0.60 
   9 -10   4    0.01    0.48 
 -10 -10  -4    0.25    0.62 
  10 -10   4    0.19    0.52 
 -11 -10  -4    0.99    0.67 
  11 -10   4    1.34    0.56 
   9 -11  -4    0.33    0.60 
  -9 -11   4   -0.45    0.67 
  -9 -11   4   -0.50    0.62 
   8 -11  -4    0.26    0.57 
  -8 -11   4   -0.18    0.65 
  -8 -11   4   -0.67    0.62 
   7 -11  -4    0.28    0.56 
  -7 -11   4    1.17    0.62 
  -7 -11   4    1.14    0.65 
  -6 -11   4    1.26    0.64 
   6 -11  -4    1.16    0.54 
  -6 -11   4    0.31    0.57 
   5 -11  -4    0.63    0.52 
  -5 -11   4   -0.02    0.61 
  -5 -11   4    0.78    0.56 
  -5  11   4   -0.17    0.48 
  -4 -11   4    1.13    0.56 
  -4 -11   4    2.23    0.62 
  -4  11   4    0.98    0.48 
   3 -11  -4    0.45    0.51 
  -3 -11   4    0.17    0.50 
  -3 -11   4    0.01    0.61 
  -3  11   4   -1.08    0.46 
   2 -11  -4   -0.16    0.51 
  -2 -11   4   -0.17    0.60 
  -2 -11   4    0.33    0.50 
  -2  11   4   -0.20    0.41 
  -1 -11   4   -0.36    0.49 
   1 -11  -4   -0.51    0.53 
  -1  11   4   -0.16    0.42 
   0 -11  -4    1.73    0.56 
   0 -11   4    1.03    0.51 
   0  11   4    2.18    0.40 
   1 -11   4   -0.30    0.50 
  -1 -11  -4   -0.06    0.51 
   1  11   4   -0.50    0.37 
   2 -11   4    0.29    0.55 
  -2 -11  -4   -0.29    0.54 
   3 -11   4    0.03    0.44 
  -3 -11  -4    0.07    0.56 
   3 -11   4    0.23    0.52 
   4 -11   4   -0.31    0.53 
  -4 -11  -4   -0.24    0.56 
   4 -11   4    1.02    0.44 
   5 -11   4    1.59    0.48 
   5 -11   4    1.05    0.57 
  -5 -11  -4    0.74    0.59 
   6 -11   4   -0.01    0.48 
   6 -11   4    0.53    0.64 
  -6 -11  -4    0.68    0.61 
  -7 -11  -4   -0.39    0.61 
   7 -11   4   -0.71    0.50 
   8 -11   4   -0.01    0.56 
  -8 -11  -4   -0.59    0.63 
   9 -11   4   -0.29    0.55 
  -9 -11  -4   -0.81    0.66 
  -7 -12   4    0.08    0.71 
  -7 -12   4    0.17    0.64 
   7 -12  -4    0.25    0.61 
  -7  12   4    0.27    0.57 
  -6 -12   4    0.52    0.70 
   6 -12  -4   -0.27    0.58 
  -6 -12   4   -0.40    0.61 
  -6  12   4   -0.32    0.57 
  -5 -12   4    1.77    0.74 
  -5 -12   4    0.85    0.61 
  -5  12   4    0.18    0.56 
  -4 -12   4    0.00    0.67 
  -4 -12   4    0.48    0.56 
  -4  12   4   -1.04    0.50 
  -3 -12   4    0.07    0.55 
  -3 -12   4    1.42    0.68 
  -3  12   4    0.48    0.49 
  -2 -12   4    1.55    0.66 
  -2 -12   4    0.09    0.54 
   2 -12  -4    1.63    0.59 
  -2  12   4   -0.80    0.48 
   1 -12  -4    0.09    0.56 
  -1 -12   4   -0.23    0.58 
  -1  12   4    0.13    0.47 
   0 -12  -4    0.81    0.63 
   0 -12   4   -0.11    0.56 
  -1 -12  -4    0.27    0.63 
   1 -12   4    0.27    0.60 
  -2 -12  -4    0.99    0.60 
   2 -12   4    0.86    0.57 
  -3 -12  -4    0.79    0.66 
   3 -12   4   -0.20    0.57 
  -4 -12  -4   -0.04    0.63 
   4 -12   4    0.58    0.63 
   5 -12   4    0.99    0.64 
   5 -12   4   -0.65    0.54 
  -5 -12  -4   -0.72    0.66 
  -6 -12  -4   -0.65    0.68 
   6 -12   4    0.86    0.65 
   6 -12   4    0.73    0.53 
  -2 -13   4    0.31    0.63 
   1 -13  -4   -0.56    0.66 
  -1 -13   4    0.29    0.63 
   0 -13   4    0.07    0.64 
   0 -13  -4    0.32    0.65 
   1 -13   4    1.10    0.66 
  -1 -13  -4    1.89    0.73 
 -17   0   5    3.61    0.62 
 -16   0   5    1.60    0.57 
  15   0  -5    6.64    0.46 
 -15   0   5    6.62    0.63 
 -14   0   5    0.46    0.51 
  14   0  -5   -0.29    0.36 
  13   0  -5    1.13    0.34 
 -13   0   5    0.94    0.47 
 -12   0   5    0.50    0.44 
  12   0  -5    0.39    0.30 
  11   0  -5   19.41    0.60 
 -11   0   5   17.92    0.77 
 -10   0   5    0.02    0.21 
 -10   0   5    0.53    0.37 
  10   0  -5   -0.20    0.22 
  -9   0   5   32.23    0.97 
   9   0  -5   33.48    0.78 
  -9   0   5   34.05    0.78 
  -8   0   5    0.37    0.30 
  -8   0   5   -0.08    0.17 
   8   0  -5    0.07    0.19 
   7   0  -5   15.87    0.46 
  -7   0   5   16.07    0.59 
  -7   0   5   15.83    0.43 
  -6   0   5    0.17    0.24 
   6   0  -5   -0.08    0.14 
   5   0  -5    7.99    0.30 
  -5   0   5    8.38    0.40 
  -4   0   5   -0.02    0.11 
  -4   0   5    0.18    0.18 
  -3   0   5  121.61    2.76 
  -3   0   5  124.42    2.35 
  -2   0   5    0.11    0.12 
  -2   0   5    0.01    0.09 
  -1   0   5  444.28    8.41 
  -1   0   5  445.95    9.81 
   0   0   5   -0.09    0.09 
   0   0   5   -0.11    0.08 
   1   0   5  814.75   15.59 
   1   0   5  838.34   18.16 
   2   0   5   -0.10    0.10 
   2   0   5    0.02    0.09 
   3   0   5   27.09    0.59 
   3   0   5   28.21    0.66 
   4   0   5    0.33    0.12 
   5   0   5   48.10    0.97 
   6   0   5    0.23    0.16 
   7   0   5   82.10    1.62 
  -7   0  -5   80.79    1.76 
  -8   0  -5    0.16    0.23 
   8   0   5   -0.20    0.19 
   9   0   5    1.15    0.23 
  -9   0  -5    1.30    0.25 
 -10   0  -5    0.33    0.28 
  10   0   5    0.32    0.24 
 -10   0  -5    0.06    0.27 
 -11   0  -5    3.27    0.36 
  11   0   5    2.54    0.30 
 -11   0  -5    2.75    0.34 
  12   0   5    0.23    0.30 
 -12   0  -5    0.25    0.34 
 -12   0  -5    0.60    0.38 
 -13   0  -5    1.05    0.39 
  13   0   5   -0.04    0.33 
 -13   0  -5    0.59    0.37 
 -14   0  -5    0.06    0.43 
  14   0   5    0.19    0.35 
 -14   0  -5    0.38    0.41 
 -15   0  -5    7.21    0.51 
 -15   0  -5    6.13    0.56 
  15   0   5    6.26    0.45 
 -16   0  -5    0.57    0.55 
  16   0   5    0.25    0.41 
  17   0   5    1.50    0.48 
 -17   0  -5    1.71    0.62 
 -17  -1   5    0.66    0.57 
 -17   1   5    0.69    0.61 
  16  -1  -5   -0.09    0.41 
 -16  -1   5    0.23    0.54 
 -16   1   5    0.56    0.57 
 -15  -1   5    0.81    0.53 
  15  -1  -5   -0.41    0.41 
 -15   1   5    0.13    0.55 
  14  -1  -5    0.10    0.36 
 -14  -1   5    0.77    0.51 
 -14   1   5    1.25    0.52 
 -13  -1   5    0.56    0.48 
  13  -1  -5    0.04    0.33 
  13   1  -5   -0.02    0.31 
 -13   1   5   -0.14    0.47 
  12  -1  -5    0.34    0.32 
 -12  -1   5    0.73    0.45 
  12   1  -5    0.35    0.29 
 -12   1   5    0.82    0.44 
 -11  -1   5    1.00    0.28 
  11  -1  -5    0.61    0.28 
 -11  -1   5    0.99    0.43 
  11   1  -5    1.10    0.25 
 -11   1   5    1.65    0.41 
 -10  -1   5    3.22    0.43 
 -10  -1   5    2.57    0.27 
  10  -1  -5    2.78    0.28 
  10   1  -5    2.93    0.26 
 -10   1   5    3.00    0.39 
   9  -1  -5   45.36    1.01 
  -9  -1   5   46.69    1.05 
  -9  -1   5   46.84    1.25 
   9   1  -5   46.36    0.99 
  -9   1   5   44.65    1.21 
  -8  -1   5   20.76    0.72 
   8  -1  -5   19.49    0.54 
  -8  -1   5   19.88    0.54 
   8   1  -5   19.26    0.52 
  -8   1   5   19.64    0.68 
   7  -1  -5   57.30    1.19 
  -7  -1   5   56.26    1.43 
  -7  -1   5   58.16    1.26 
   7   1  -5   59.91    1.16 
  -7   1   5   56.53    1.41 
  -6  -1   5   65.42    1.41 
  -6  -1   5   64.94    1.56 
   6  -1  -5   67.08    1.33 
   6   1  -5   63.26    1.28 
  -6   1   5   65.81    1.55 
  -5  -1   5   17.87    0.48 
   5  -1  -5   18.45    0.46 
  -5  -1   5   17.48    0.41 
  -5  -1   5   17.27    0.55 
  -5   1   5   18.41    0.55 
  -4  -1   5    5.45    0.34 
   4  -1  -5    5.58    0.27 
  -4  -1   5    6.36    0.22 
  -4   1   5    5.72    0.31 
  -3  -1   5    6.24    0.20 
  -3  -1   5    5.37    0.31 
  -3   1   5    6.07    0.31 
  -3   1   5    5.83    0.25 
  -2  -1   5  202.13    4.47 
  -2  -1   5  204.59    3.81 
  -2   1   5  206.28    3.83 
  -2   1   5  194.23    4.46 
  -1  -1   5   51.30    1.18 
  -1  -1   5   50.70    1.00 
  -1   1   5   51.80    1.01 
  -1   1   5   51.58    1.17 
   0  -1   5   21.15    0.46 
   0  -1   5   22.32    0.54 
   0   1   5   21.91    0.48 
   0   1   5   22.41    0.51 
   1  -1   5  190.28    4.16 
   1  -1   5  184.07    3.56 
   1   1   5  187.40    3.57 
   1   1   5  190.63    4.13 
   2  -1   5    0.29    0.10 
   2  -1   5    0.36    0.13 
   2   1   5    0.29    0.09 
   2   1   5    0.48    0.08 
   3  -1   5   10.37    0.29 
   3  -1   5   10.03    0.31 
   3   1   5    9.82    0.29 
   4  -1   5   13.62    0.37 
   4  -1   5   13.66    0.41 
  -4  -1  -5   13.94    0.42 
   4   1   5   13.66    0.36 
   5  -1   5   60.11    1.22 
  -5  -1  -5   62.49    1.35 
   5   1   5   60.84    1.22 
   6  -1   5    6.12    0.28 
  -6  -1  -5    6.37    0.31 
   6   1   5    5.76    0.29 
  -7  -1  -5   20.46    0.59 
   7  -1   5   20.79    0.54 
  -7  -1  -5   19.55    0.58 
   7   1   5   19.91    0.52 
  -8  -1  -5   47.92    1.13 
  -8  -1  -5   46.99    1.17 
   8  -1   5   50.22    1.04 
   8   1   5   48.19    1.02 
  -9  -1  -5    9.15    0.48 
  -9  -1  -5    8.96    0.46 
   9  -1   5    8.47    0.42 
   9   1   5    8.88    0.40 
  -9   1  -5    8.78    0.47 
 -10  -1  -5    0.51    0.29 
  10  -1   5   -0.09    0.26 
 -10  -1  -5    0.21    0.28 
  10   1   5    0.04    0.24 
 -10   1  -5    0.13    0.29 
 -11  -1  -5    0.44    0.34 
 -11  -1  -5    0.40    0.33 
  11  -1   5    0.02    0.28 
  11   1   5    0.19    0.26 
 -11   1  -5    0.65    0.31 
 -12  -1  -5    4.31    0.41 
 -12  -1  -5    4.94    0.41 
  12  -1   5    4.43    0.37 
 -12   1  -5    4.25    0.38 
  12   1   5    3.95    0.35 
 -12   1  -5    4.83    0.44 
 -13  -1  -5    3.06    0.45 
 -13  -1  -5    3.39    0.43 
  13  -1   5    3.01    0.36 
 -13   1  -5    3.19    0.38 
  13   1   5    2.47    0.34 
 -13   1  -5    2.58    0.44 
 -14  -1  -5    4.63    0.45 
 -14  -1  -5    5.40    0.53 
  14  -1   5    4.37    0.42 
 -14   1  -5    5.33    0.43 
  14   1   5    4.18    0.39 
 -14   1  -5    4.43    0.54 
  15  -1   5    0.72    0.41 
 -15  -1  -5    0.95    0.46 
 -15  -1  -5    1.36    0.52 
 -15   1  -5    1.20    0.47 
  15   1   5    0.89    0.37 
  16  -1   5   -0.06    0.43 
 -16  -1  -5    0.04    0.49 
 -16  -1  -5    0.32    0.54 
 -16   1  -5   -0.44    0.55 
  16   1   5   -0.11    0.42 
 -17  -1  -5    0.89    0.55 
  17  -1   5    0.12    0.46 
 -17   1  -5    0.08    0.60 
  17   1   5   -0.16    0.45 
  17  -2  -5    0.55    0.49 
 -17  -2   5    1.63    0.59 
 -17   2   5    0.41    0.63 
  16  -2  -5    3.43    0.48 
 -16  -2   5    4.29    0.62 
 -16   2   5    3.83    0.63 
  15  -2  -5   -0.05    0.44 
 -15  -2   5    0.78    0.54 
 -15   2   5   -0.28    0.54 
 -14  -2   5    5.50    0.60 
  14  -2  -5    4.73    0.44 
 -14   2   5    4.74    0.57 
 -13  -2   5    1.86    0.50 
  13  -2  -5    1.77    0.40 
 -13   2   5    0.89    0.49 
  12  -2  -5    1.34    0.34 
 -12  -2   5    1.76    0.48 
 -12  -2   5    1.69    0.34 
 -12   2   5    1.56    0.45 
 -11  -2   5   20.69    0.83 
 -11  -2   5   19.98    0.63 
  11  -2  -5   19.93    0.65 
 -11   2   5   19.24    0.79 
  11   2  -5   20.36    0.57 
  10  -2  -5   13.11    0.53 
 -10  -2   5   13.28    0.51 
 -10  -2   5   14.36    0.70 
  10   2  -5   13.16    0.46 
 -10   2   5   12.63    0.58 
   9  -2  -5    3.31    0.30 
  -9  -2   5    3.97    0.39 
  -9  -2   5    3.60    0.30 
   9   2  -5    4.19    0.30 
  -9   2   5    3.67    0.36 
   8  -2  -5   18.42    0.55 
  -8  -2   5   18.64    0.55 
  -8  -2   5   17.94    0.71 
   8   2  -5   18.20    0.47 
  -8   2   5   18.52    0.60 
   7  -2  -5    0.89    0.19 
  -7  -2   5    0.44    0.22 
  -7  -2   5    0.44    0.31 
   7   2  -5    0.79    0.15 
  -7   2   5    0.75    0.26 
  -6  -2   5    0.97    0.21 
  -6  -2   5    1.14    0.25 
  -6  -2   5    1.32    0.12 
   6  -2  -5    1.22    0.20 
  -6   2   5    1.19    0.23 
  -5  -2   5   -0.35    0.23 
   5  -2  -5    0.19    0.18 
  -5  -2   5    0.38    0.10 
  -5  -2   5    0.57    0.20 
  -5   2   5    0.46    0.19 
  -4  -2   5   13.30    0.30 
   4  -2  -5   12.31    0.30 
  -4  -2   5   12.55    0.47 
   4  -2  -5   11.74    0.39 
  -4  -2   5   12.82    0.41 
  -4   2   5   12.90    0.40 
  -3  -2   5   21.14    0.43 
   3  -2  -5   20.60    0.47 
  -3  -2   5   20.93    0.56 
  -3   2   5   20.05    0.53 
  -3   2   5   20.52    0.48 
   2  -2  -5   26.52    0.58 
  -2  -2   5   25.37    0.66 
  -2  -2   5   25.15    0.52 
  -2   2   5   25.67    0.63 
  -2   2   5   26.11    0.57 
  -1  -2   5    0.40    0.14 
   1  -2  -5    0.44    0.11 
  -1  -2   5    0.40    0.08 
  -1   2   5    0.22    0.11 
  -1   2   5    0.39    0.11 
   0  -2   5  336.98    7.37 
   0  -2  -5  343.64    6.90 
   0  -2   5  322.46    6.30 
   0   2   5  337.56    6.31 
   0   2   5  327.94    7.33 
   1  -2   5    0.90    0.15 
   1  -2   5    0.61    0.10 
  -1  -2  -5    0.67    0.14 
   1   2   5    0.74    0.12 
  -2  -2  -5   88.33    1.85 
   2  -2   5   85.24    1.68 
   2  -2   5   86.77    1.96 
   2   2   5   87.52    1.68 
   3  -2   5    4.62    0.24 
  -3  -2  -5    4.44    0.29 
   3  -2   5    4.43    0.25 
   3   2   5    3.91    0.23 
   4  -2   5  134.94    2.98 
  -4  -2  -5  133.08    2.95 
  -4  -2  -5  135.23    2.80 
   4  -2   5  130.82    2.56 
   4   2   5  131.44    2.55 
  -5  -2  -5   29.17    0.69 
  -5  -2  -5   27.97    0.70 
   5  -2   5   27.67    0.73 
   5  -2   5   28.16    0.64 
   5   2   5   28.26    0.62 
  -6  -2  -5   52.80    1.22 
  -6  -2  -5   54.14    1.27 
   6  -2   5   54.05    1.11 
   6   2   5   53.67    1.09 
   7  -2   5    9.39    0.39 
  -7  -2  -5    9.96    0.45 
  -7  -2  -5    9.60    0.40 
   7   2   5    9.91    0.35 
   8  -2   5    3.06    0.26 
  -8  -2  -5    3.51    0.30 
  -8  -2  -5    2.47    0.28 
   8   2   5    2.68    0.22 
  -9  -2  -5    4.05    0.33 
   9  -2   5    3.21    0.28 
  -9  -2  -5    3.49    0.33 
   9   2   5    3.50    0.25 
 -10  -2  -5    3.33    0.35 
  10  -2   5    2.62    0.30 
 -10  -2  -5    2.78    0.33 
  10   2   5    2.54    0.26 
 -11  -2  -5    3.79    0.41 
 -11  -2  -5    3.36    0.37 
  11  -2   5    3.24    0.34 
  11   2   5    2.76    0.31 
 -11   2  -5    3.72    0.34 
 -12  -2  -5    0.47    0.40 
 -12  -2  -5   -0.12    0.36 
  12  -2   5    0.16    0.32 
  12   2   5    0.30    0.29 
 -12   2  -5    0.79    0.33 
 -13  -2  -5    0.92    0.42 
  13  -2   5    1.01    0.33 
 -13  -2  -5    1.48    0.45 
  13   2   5    1.24    0.31 
 -13   2  -5    0.28    0.35 
 -13   2  -5    0.75    0.44 
  14  -2   5    0.59    0.39 
 -14  -2  -5    0.07    0.45 
 -14  -2  -5    1.64    0.49 
  14   2   5    1.12    0.36 
 -14   2  -5    0.61    0.48 
 -14   2  -5    0.32    0.37 
 -15  -2  -5   -0.24    0.48 
 -15  -2  -5    0.82    0.49 
  15  -2   5    0.08    0.41 
 -15   2  -5    0.04    0.56 
  15   2   5   -0.23    0.38 
 -16  -2  -5    4.72    0.62 
 -16  -2  -5    3.83    0.56 
  16  -2   5    4.24    0.49 
  16   2   5    4.20    0.43 
 -16   2  -5    3.58    0.56 
 -17  -2  -5    1.21    0.60 
  17  -2   5    0.30    0.48 
 -17   2  -5   -0.30    0.60 
 -17  -3   5    1.61    0.66 
  17  -3  -5    0.58    0.52 
 -17   3   5    0.85    0.64 
 -16  -3   5    1.11    0.58 
  16  -3  -5    0.01    0.46 
 -16   3   5    0.28    0.61 
  15  -3  -5    0.12    0.46 
 -15  -3   5    0.96    0.60 
 -15   3   5    0.09    0.58 
  14  -3  -5    1.36    0.42 
 -14  -3   5    1.17    0.55 
 -14   3   5    0.73    0.53 
 -13  -3   5    5.87    0.46 
  13  -3  -5    4.66    0.44 
 -13  -3   5    6.36    0.61 
 -13   3   5    5.39    0.55 
 -12  -3   5    0.55    0.49 
 -12  -3   5    0.71    0.37 
  12  -3  -5    0.57    0.35 
 -12   3   5    0.39    0.44 
 -11  -3   5    2.11    0.35 
 -11  -3   5    2.85    0.49 
  11  -3  -5    2.38    0.35 
 -11   3   5    2.42    0.43 
 -10  -3   5    5.27    0.50 
  10  -3  -5    4.50    0.36 
 -10  -3   5    4.62    0.36 
 -10   3   5    5.49    0.43 
   9  -3  -5    2.16    0.30 
  -9  -3   5    2.23    0.43 
  -9  -3   5    2.06    0.31 
  -9   3   5    2.17    0.35 
   9   3  -5    2.37    0.18 
   8  -3  -5   37.60    0.88 
  -8  -3   5   37.67    0.75 
  -8  -3   5   36.83    0.92 
  -8  -3   5   33.72    1.07 
  -8   3   5   37.10    0.98 
  -7  -3   5   22.87    0.77 
  -7  -3   5   24.62    0.51 
   7  -3  -5   25.83    0.67 
  -7  -3   5   24.25    0.66 
  -7   3   5   24.07    0.71 
  -6  -3   5   37.60    1.04 
   6  -3  -5   38.01    0.87 
  -6  -3   5   38.05    0.92 
  -6  -3   5   37.48    0.74 
  -6   3   5   38.41    0.96 
   5  -3  -5    0.13    0.20 
  -5  -3   5    0.17    0.23 
  -5  -3   5    0.10    0.26 
  -5   3   5    0.04    0.20 
  -4  -3   5   11.94    0.45 
   4  -3  -5   12.10    0.42 
  -4  -3   5   11.91    0.25 
  -4  -3   5   11.62    0.45 
   4  -3  -5   11.07    0.31 
  -4   3   5   11.69    0.40 
   3  -3  -5   34.24    0.76 
  -3  -3   5   34.60    0.82 
  -3  -3   5   33.85    0.66 
   3  -3  -5   34.01    0.75 
  -3  -3   5   33.83    0.85 
  -3   3   5   34.41    0.82 
  -3   3   5   33.73    0.76 
   2  -3  -5    1.23    0.14 
  -2  -3   5    1.20    0.19 
  -2  -3   5    1.40    0.09 
  -2   3   5    1.13    0.16 
  -2   3   5    1.38    0.13 
   1  -3  -5   14.44    0.39 
  -1  -3   5   13.43    0.41 
  -1  -3   5   13.53    0.32 
  -1   3   5   13.80    0.36 
  -1   3   5   14.38    0.39 
   0  -3   5   91.79    2.05 
   0  -3  -5   89.63    1.90 
   0  -3   5   89.21    1.73 
   0   3   5   88.32    1.99 
   0   3   5   91.14    1.75 
   1  -3   5    4.97    0.21 
   1  -3   5    5.87    0.28 
  -1  -3  -5    5.45    0.28 
   1   3   5    4.86    0.26 
   2  -3   5    0.16    0.18 
   2  -3   5    0.18    0.11 
  -2  -3  -5    0.19    0.15 
   2   3   5    0.32    0.13 
  -3  -3  -5  135.51    2.92 
   3  -3   5  140.33    3.12 
   3  -3   5  138.72    2.66 
   3   3   5  140.79    2.66 
   4  -3   5    1.40    0.15 
   4  -3   5    1.29    0.23 
  -4  -3  -5    1.47    0.13 
  -4  -3  -5    1.38    0.19 
   4   3   5    1.36    0.15 
  -5  -3  -5    0.42    0.22 
   5  -3   5    0.58    0.17 
   5  -3   5    0.20    0.24 
  -5  -3  -5   -0.07    0.17 
   5   3   5    0.32    0.15 
   6  -3   5   36.28    0.93 
  -6  -3  -5   32.95    0.93 
  -6  -3  -5   37.50    0.91 
   6  -3   5   37.31    0.82 
   6   3   5   37.88    0.78 
  -7  -3  -5    5.23    0.35 
  -7  -3  -5    5.99    0.43 
   7  -3   5    6.44    0.38 
   7   3   5    6.08    0.34 
  -8  -3  -5    8.16    0.53 
  -8  -3  -5   10.53    0.51 
   8  -3   5   10.33    0.42 
   8   3   5   10.42    0.38 
  -9  -3  -5   29.42    0.84 
  -9  -3  -5   28.80    0.91 
   9  -3   5   30.12    0.74 
   9   3   5   29.77    0.71 
  10  -3   5    8.13    0.45 
 -10  -3  -5    8.86    0.63 
 -10  -3  -5    8.81    0.54 
  10   3   5    8.18    0.43 
 -11  -3  -5    1.58    0.44 
  11  -3   5    0.99    0.29 
 -11  -3  -5    1.37    0.36 
  11   3   5    0.83    0.28 
  12  -3   5    1.24    0.36 
 -12  -3  -5    1.60    0.43 
 -12  -3  -5    1.52    0.44 
  12   3   5    1.45    0.30 
 -12   3  -5    1.09    0.36 
  13  -3   5    3.90    0.42 
 -13  -3  -5    5.91    0.56 
 -13  -3  -5    4.52    0.49 
  13   3   5    3.74    0.35 
 -13   3  -5    4.53    0.42 
 -14  -3  -5    1.05    0.50 
 -14  -3  -5    0.61    0.48 
  14  -3   5    0.66    0.40 
  14   3   5    0.51    0.35 
 -14   3  -5    0.40    0.49 
 -15  -3  -5    3.06    0.56 
 -15  -3  -5    2.13    0.51 
  15  -3   5    1.70    0.45 
 -15   3  -5    1.39    0.61 
  15   3   5    1.55    0.39 
  16  -3   5   -0.27    0.47 
 -16  -3  -5   -0.33    0.54 
 -16   3  -5    0.48    0.60 
 -16  -4   5    0.39    0.62 
  16  -4  -5    0.30    0.55 
 -16   4   5    1.05    0.63 
 -15  -4   5    1.62    0.66 
  15  -4  -5    0.61    0.47 
 -15   4   5    0.43    0.60 
 -14  -4   5    2.57    0.63 
  14  -4  -5    0.93    0.44 
 -14   4   5    1.59    0.56 
  13  -4  -5    0.47    0.40 
 -13  -4   5    1.77    0.58 
 -13  -4   5    0.45    0.45 
 -13   4   5    0.16    0.50 
 -12  -4   5    1.23    0.53 
 -12  -4   5    0.57    0.40 
  12  -4  -5    0.53    0.38 
 -12   4   5    0.95    0.46 
 -11  -4   5   11.30    0.77 
 -11  -4   5   11.22    0.59 
  11  -4  -5   10.45    0.58 
 -11   4   5   12.11    0.68 
 -10  -4   5    0.73    0.36 
  10  -4  -5    0.66    0.33 
 -10  -4   5    0.19    0.47 
 -10   4   5    1.09    0.40 
   9  -4  -5    6.85    0.40 
  -9  -4   5    6.72    0.50 
  -9  -4   5    7.18    0.54 
  -9   4   5    7.32    0.52 
  -8  -4   5    1.47    0.40 
   8  -4  -5    1.52    0.27 
  -8  -4   5    1.49    0.31 
  -8   4   5    1.47    0.33 
  -7  -4   5    2.59    0.33 
  -7  -4   5    3.27    0.41 
   7  -4  -5    3.22    0.31 
  -7   4   5    3.73    0.32 
  -6  -4   5   37.20    1.02 
  -6  -4   5   37.51    0.95 
   6  -4  -5   37.10    0.89 
  -6   4   5   38.29    0.97 
   5  -4  -5   49.71    1.07 
  -5  -4   5   50.80    1.27 
   5  -4  -5   51.83    1.11 
  -5  -4   5   50.78    1.18 
  -5   4   5   50.24    1.21 
  -4  -4   5  132.05    2.78 
   4  -4  -5  131.91    2.56 
   4  -4  -5  130.39    2.71 
  -4  -4   5  127.00    2.97 
   3  -4  -5    3.06    0.18 
   3  -4  -5    2.52    0.22 
  -3  -4   5    2.90    0.13 
  -3  -4   5    3.35    0.28 
  -3  -4   5    3.07    0.28 
  -3   4   5    3.24    0.21 
  -2  -4   5   27.63    0.74 
  -2  -4   5   27.97    0.58 
   2  -4  -5   29.53    0.68 
  -2  -4   5   29.04    0.74 
  -2   4   5   28.83    0.67 
  -1  -4   5    5.26    0.32 
  -1  -4   5    5.46    0.21 
   1  -4  -5    5.46    0.31 
  -1   4   5    5.22    0.28 
   0  -4  -5    8.23    0.34 
   0  -4   5    8.15    0.26 
   0  -4   5    7.90    0.36 
   0   4   5    7.83    0.33 
   1  -4   5   94.56    1.86 
  -1  -4  -5   97.37    2.06 
   1  -4   5   95.31    2.19 
   1   4   5   97.19    1.87 
   2  -4   5    1.17    0.15 
  -2  -4  -5    0.42    0.18 
   2  -4   5    0.62    0.22 
   2   4   5    0.67    0.16 
  -3  -4  -5    0.93    0.22 
   3  -4   5    0.79    0.23 
   3  -4   5    0.97    0.16 
   3   4   5    0.80    0.16 
  -4  -4  -5    5.67    0.35 
  -4  -4  -5    5.95    0.21 
   4  -4   5    5.51    0.36 
   4  -4   5    5.56    0.32 
   4   4   5    5.20    0.31 
  -5  -4  -5   12.89    0.53 
   5  -4   5   13.61    0.49 
   5  -4   5   13.34    0.45 
  -5  -4  -5   13.21    0.38 
   5   4   5   12.83    0.39 
  -6  -4  -5    7.84    0.41 
   6  -4   5    7.84    0.36 
   6  -4   5    8.13    0.43 
  -6  -4  -5    7.41    0.38 
   6   4   5    7.69    0.33 
  -7  -4  -5    0.06    0.29 
   7  -4   5   -0.09    0.21 
  -7  -4  -5   -0.30    0.26 
   7   4   5    0.12    0.19 
  -8  -4  -5   14.62    0.63 
  -8  -4  -5   16.37    0.63 
   8  -4   5   16.26    0.53 
   8   4   5   17.01    0.49 
  -9  -4  -5   -0.31    0.36 
  -9  -4  -5    0.82    0.34 
   9  -4   5    0.76    0.26 
   9   4   5    0.60    0.23 
 -10  -4  -5    3.13    0.42 
 -10  -4  -5    1.84    0.43 
  10  -4   5    2.76    0.34 
  10   4   5    2.97    0.27 
  11  -4   5    2.83    0.37 
 -11  -4  -5    3.80    0.42 
 -11  -4  -5    1.71    0.47 
  11   4   5    3.61    0.30 
 -12  -4  -5    0.76    0.46 
 -12  -4  -5    1.38    0.45 
  12  -4   5    1.91    0.35 
  12   4   5    1.48    0.30 
 -13  -4  -5    0.54    0.51 
 -13  -4  -5    0.10    0.45 
  13  -4   5    0.35    0.40 
  13   4   5    0.29    0.31 
  14  -4   5    0.55    0.43 
 -14  -4  -5    0.62    0.51 
 -15  -4  -5    2.29    0.54 
  15  -4   5    1.64    0.47 
 -15   4  -5    1.03    0.62 
 -16  -4  -5    0.20    0.54 
  16  -4   5    0.20    0.49 
 -16   4  -5   -0.32    0.67 
  16  -5  -5   -0.30    0.57 
 -16  -5   5    1.68    0.67 
 -16   5   5   -0.16    0.66 
  15  -5  -5    1.09    0.52 
 -15  -5   5    1.78    0.66 
 -15   5   5    0.91    0.63 
 -14  -5   5    1.92    0.53 
 -14  -5   5    2.64    0.64 
  14  -5  -5    0.98    0.48 
 -14   5   5    1.72    0.60 
  13  -5  -5    0.00    0.45 
 -13  -5   5    0.07    0.59 
 -13  -5   5    0.37    0.47 
 -13   5   5   -0.40    0.52 
 -12  -5   5   12.62    0.82 
  12  -5  -5   13.56    0.70 
 -12  -5   5   13.80    0.72 
 -12   5   5   15.21    0.79 
 -11  -5   5    0.03    0.42 
  11  -5  -5   -0.11    0.38 
 -11  -5   5   -1.09    0.53 
 -11   5   5    0.52    0.48 
 -10  -5   5    0.27    0.51 
 -10  -5   5    0.22    0.37 
  10  -5  -5   -0.08    0.36 
 -10   5   5    0.20    0.40 
  -9  -5   5   -0.13    0.35 
  -9  -5   5   -0.02    0.45 
   9  -5  -5    0.46    0.35 
  -9   5   5    0.41    0.40 
  -8  -5   5   -0.55    0.42 
  -8  -5   5   -0.38    0.33 
   8  -5  -5   -0.25    0.31 
  -8   5   5    0.01    0.33 
  -7  -5   5    0.51    0.35 
  -7  -5   5    0.92    0.40 
   7  -5  -5    1.00    0.28 
  -7   5   5    1.12    0.30 
  -6  -5   5    6.34    0.47 
  -6  -5   5    5.90    0.45 
   6  -5  -5    6.85    0.42 
  -5  -5   5    0.02    0.30 
   5  -5  -5   -0.04    0.23 
   5  -5  -5   -0.15    0.16 
  -5  -5   5   -0.28    0.31 
  -4  -5   5    4.10    0.34 
  -4  -5   5    4.05    0.34 
   4  -5  -5    3.87    0.30 
   4  -5  -5    3.54    0.28 
  -3  -5   5   13.13    0.49 
   3  -5  -5   13.29    0.49 
  -3  -5   5   11.72    0.29 
   3  -5  -5   12.80    0.40 
  -3  -5   5   12.25    0.52 
  -3   5   5   12.35    0.48 
  -2  -5   5   20.57    0.46 
   2  -5  -5   21.99    0.60 
  -2  -5   5   21.36    0.65 
  -2  -5   5   20.48    0.63 
  -2   5   5   21.56    0.58 
  -1  -5   5    7.43    0.38 
  -1  -5   5    7.31    0.27 
   1  -5  -5    7.77    0.40 
  -1   5   5    6.93    0.38 
   0  -5  -5    0.14    0.21 
   0  -5   5    0.45    0.25 
   0  -5   5    0.61    0.14 
   0   5   5    0.41    0.19 
   1  -5   5    5.36    0.29 
  -1  -5  -5    5.97    0.39 
   1  -5   5    5.97    0.37 
   1   5   5    5.44    0.33 
   2  -5   5  110.44    2.16 
  -2  -5  -5  110.12    2.45 
   2  -5   5  110.87    2.54 
  -2  -5  -5  109.94    2.39 
   2   5   5  112.65    2.16 
  -3  -5  -5    6.47    0.24 
   3  -5   5    7.12    0.34 
  -3  -5  -5    7.05    0.46 
   3  -5   5    7.21    0.41 
   3   5   5    6.81    0.33 
   4  -5   5   56.59    1.20 
  -4  -5  -5   58.65    1.35 
  -4  -5  -5   57.89    1.30 
   4  -5   5   57.00    1.40 
   4   5   5   57.67    1.18 
   5  -5   5    2.31    0.24 
   5  -5   5    2.53    0.32 
  -5  -5  -5    2.18    0.18 
  -5  -5  -5    1.98    0.31 
   5   5   5    1.72    0.19 
  -6  -5  -5    8.04    0.52 
   6  -5   5    6.73    0.46 
  -6  -5  -5    7.03    0.31 
   6  -5   5    7.12    0.44 
   6   5   5    7.40    0.33 
  -7  -5  -5   10.65    0.58 
  -7  -5  -5   10.02    0.42 
   7  -5   5   11.43    0.52 
   7  -5   5   10.31    0.53 
   7   5   5   10.74    0.41 
  -8  -5  -5   12.10    0.50 
  -8  -5  -5   12.09    0.63 
   8  -5   5   12.84    0.56 
   8   5   5   12.65    0.44 
  -9  -5  -5   10.56    0.62 
  -9  -5  -5    9.79    0.60 
   9  -5   5   10.53    0.51 
   9   5   5   10.51    0.43 
  10  -5   5   -0.12    0.33 
 -10  -5  -5   -0.21    0.42 
 -10  -5  -5    0.02    0.39 
  10   5   5    0.43    0.25 
 -11  -5  -5    0.54    0.45 
  11  -5   5   -0.02    0.36 
  11   5   5   -0.19    0.26 
  12  -5   5   -0.09    0.35 
 -12  -5  -5    0.14    0.45 
  13  -5   5    0.23    0.38 
 -13  -5  -5    0.97    0.49 
  14  -5   5    1.19    0.46 
 -14  -5  -5    0.96    0.52 
  15  -5   5    0.02    0.48 
 -15  -5  -5    0.14    0.53 
  16  -5   5    0.03    0.51 
 -16  -5  -5    0.28    0.61 
 -15  -6   5    0.34    0.69 
  15  -6  -5    0.44    0.55 
 -15  -6   5    0.11    0.59 
 -15   6   5    0.28    0.65 
  14  -6  -5    0.65    0.51 
 -14  -6   5    0.44    0.56 
 -14  -6   5    0.01    0.67 
 -14   6   5    0.16    0.59 
  13  -6  -5    0.02    0.49 
 -13  -6   5    0.14    0.53 
 -13  -6   5   -0.37    0.68 
 -13   6   5    0.28    0.55 
  12  -6  -5    2.63    0.49 
 -12  -6   5    2.76    0.66 
 -12  -6   5    2.64    0.53 
 -12   6   5    3.05    0.59 
 -11  -6   5    1.77    0.62 
 -11  -6   5    1.71    0.49 
  11  -6  -5    1.97    0.41 
 -11   6   5    2.66    0.51 
  10  -6  -5    4.64    0.42 
 -10  -6   5    4.66    0.48 
 -10  -6   5    4.41    0.62 
 -10   6   5    5.76    0.51 
  -9  -6   5    0.26    0.40 
  -9  -6   5   -0.18    0.49 
   9  -6  -5    0.13    0.38 
  -9   6   5    0.15    0.39 
  -8  -6   5    1.68    0.48 
  -8  -6   5    1.66    0.40 
   8  -6  -5    1.00    0.33 
  -7  -6   5    1.80    0.44 
   7  -6  -5    1.47    0.31 
  -7  -6   5    1.35    0.38 
  -6  -6   5    0.07    0.38 
  -6  -6   5    0.17    0.36 
   6  -6  -5    0.41    0.31 
  -5  -6   5   41.71    1.09 
   5  -6  -5   41.38    0.96 
  -5  -6   5   40.91    1.13 
   5  -6  -5   44.64    1.03 
  -4  -6   5   39.53    1.03 
   4  -6  -5   39.66    0.95 
   4  -6  -5   38.91    0.91 
  -4  -6   5   37.63    1.04 
  -3  -6   5   24.95    0.77 
   3  -6  -5   24.84    0.65 
  -3  -6   5   25.33    0.53 
  -3  -6   5   25.13    0.75 
   3  -6  -5   24.70    0.71 
  -3   6   5   25.49    0.67 
  -2  -6   5    1.10    0.33 
  -2  -6   5    0.97    0.30 
   2  -6  -5    1.17    0.26 
  -2  -6   5    0.88    0.14 
  -2   6   5    0.99    0.24 
   1  -6  -5    0.14    0.25 
  -1  -6   5    0.17    0.15 
  -1  -6   5    0.16    0.29 
  -1   6   5   -0.01    0.22 
   0  -6   5   15.34    0.44 
   0  -6  -5   15.75    0.55 
   0  -6   5   14.13    0.56 
   0   6   5   15.19    0.50 
   1  -6   5    3.35    0.34 
  -1  -6  -5    3.35    0.23 
   1  -6   5    3.32    0.22 
  -1  -6  -5    3.40    0.31 
   1   6   5    3.22    0.24 
   2  -6   5    3.34    0.22 
  -2  -6  -5    2.87    0.31 
  -2  -6  -5    3.00    0.23 
   2  -6   5    2.63    0.34 
   2   6   5    2.99    0.23 
  -3  -6  -5    0.08    0.16 
  -3  -6  -5   -0.10    0.29 
   3  -6   5   -0.15    0.21 
   3  -6   5   -0.05    0.31 
   3   6   5    0.14    0.19 
   4  -6   5    2.55    0.26 
  -4  -6  -5    2.48    0.31 
   4  -6   5    3.03    0.36 
  -4  -6  -5    3.19    0.23 
   4   6   5    2.61    0.22 
   5  -6   5    6.40    0.44 
   5  -6   5    6.33    0.42 
  -5  -6  -5    6.74    0.29 
  -5  -6  -5    6.11    0.41 
   5   6   5    6.57    0.34 
   6  -6   5    2.98    0.36 
  -6  -6  -5    2.35    0.22 
  -6  -6  -5    2.15    0.37 
   6  -6   5    2.21    0.27 
   6   6   5    2.17    0.23 
   7  -6   5    2.52    0.42 
  -7  -6  -5    2.18    0.39 
   7  -6   5    2.03    0.31 
  -7  -6  -5    2.21    0.25 
   7   6   5    2.22    0.24 
  -8  -6  -5    1.19    0.40 
   8  -6   5    1.69    0.33 
   8   6   5    1.74    0.25 
  -9  -6  -5    4.55    0.47 
   9  -6   5    4.68    0.40 
   9   6   5    4.48    0.29 
  10  -6   5   12.71    0.66 
 -10  -6  -5   12.60    0.70 
  10   6   5   11.20    0.49 
 -11  -6  -5    4.28    0.51 
  11  -6   5    4.47    0.45 
  12  -6   5    0.72    0.39 
 -12  -6  -5   -0.11    0.48 
 -13  -6  -5    2.13    0.57 
  13  -6   5    3.26    0.49 
  14  -6   5    0.08    0.47 
 -14  -6  -5    0.10    0.55 
  15  -6   5   -0.20    0.50 
 -15  -6  -5   -0.23    0.57 
 -14  -7   5    0.36    0.61 
 -14  -7   5   -1.17    0.73 
  14  -7  -5    0.32    0.54 
 -14   7   5    0.09    0.65 
  13  -7  -5    4.25    0.56 
 -13  -7   5    1.80    0.79 
 -13  -7   5    3.02    0.58 
 -13   7   5    3.53    0.65 
 -12  -7   5   -0.27    0.55 
  12  -7  -5   -0.23    0.48 
 -12  -7   5   -0.94    0.67 
 -12   7   5    0.31    0.60 
 -11  -7   5    2.32    0.72 
 -11  -7   5    2.80    0.52 
  11  -7  -5    2.65    0.50 
 -11   7   5    3.99    0.57 
 -10  -7   5    0.16    0.59 
  10  -7  -5   -0.29    0.43 
 -10  -7   5    0.05    0.47 
 -10   7   5   -0.07    0.47 
   9  -7  -5   -0.36    0.40 
  -9  -7   5    0.07    0.53 
  -9  -7   5    0.13    0.45 
   8  -7  -5    0.94    0.40 
  -8  -7   5    0.91    0.49 
  -8  -7   5    0.82    0.44 
   7  -7  -5    0.35    0.37 
  -7  -7   5   -0.33    0.43 
  -7  -7   5    0.50    0.42 
  -6  -7   5   -0.32    0.40 
   6  -7  -5    0.22    0.35 
  -6  -7   5   -0.33    0.39 
  -5  -7   5    0.27    0.38 
  -5  -7   5    0.51    0.35 
   5  -7  -5    0.33    0.34 
   5  -7  -5   -0.13    0.26 
  -4  -7   5    3.91    0.41 
  -4  -7   5    3.49    0.40 
   4  -7  -5    3.99    0.38 
   4  -7  -5    3.98    0.31 
   3  -7  -5    8.12    0.45 
  -3  -7   5    7.34    0.49 
  -3  -7   5    7.46    0.57 
   3  -7  -5    6.93    0.46 
  -3   7   5    6.94    0.50 
  -2  -7   5    0.24    0.17 
   2  -7  -5    0.65    0.31 
  -2  -7   5    0.25    0.33 
  -2  -7   5    0.28    0.37 
  -2   7   5   -0.04    0.26 
  -1  -7   5    2.85    0.21 
   1  -7  -5    2.89    0.32 
  -1  -7   5    2.99    0.37 
  -1  -7   5    3.49    0.41 
  -1   7   5    2.85    0.29 
   0  -7  -5    9.53    0.48 
   0  -7   5    9.23    0.51 
   0  -7   5    8.83    0.41 
   0   7   5    9.59    0.47 
   1  -7   5   27.88    0.70 
  -1  -7  -5   27.39    0.70 
   1  -7   5   27.90    0.83 
  -1  -7  -5   28.02    0.79 
   1   7   5   28.16    0.71 
  -2  -7  -5    1.52    0.34 
  -2  -7  -5    1.43    0.22 
   2  -7   5    1.31    0.24 
   2  -7   5    1.00    0.35 
   2   7   5    1.20    0.23 
  -3  -7  -5   14.60    0.67 
   3  -7   5   14.00    0.61 
  -3  -7  -5   14.39    0.43 
   3  -7   5   13.76    0.51 
   3   7   5   13.94    0.50 
   4  -7   5    0.30    0.25 
   4  -7   5    0.12    0.37 
  -4  -7  -5    0.30    0.20 
  -4  -7  -5   -0.04    0.35 
   4   7   5    0.56    0.23 
  -5  -7  -5   17.39    0.75 
   5  -7   5   16.99    0.67 
   5  -7   5   17.80    0.61 
   5   7   5   16.55    0.56 
   6  -7   5    2.18    0.44 
  -6  -7  -5    1.78    0.42 
   6  -7   5    1.71    0.32 
   6   7   5    2.19    0.24 
   7  -7   5   -0.39    0.43 
   7  -7   5    0.01    0.32 
  -7  -7  -5    0.12    0.40 
   7   7   5    0.15    0.25 
   8  -7   5    9.48    0.62 
  -8  -7  -5    8.65    0.69 
   8   7   5    8.78    0.45 
  -9  -7  -5    1.53    0.47 
   9  -7   5    1.48    0.39 
  10  -7   5    0.16    0.40 
 -10  -7  -5   -0.11    0.48 
  11  -7   5    1.76    0.44 
 -11  -7  -5    1.51    0.51 
  12  -7   5    0.67    0.45 
 -12  -7  -5    0.33    0.53 
  13  -7   5    0.56    0.48 
 -13  -7  -5   -0.27    0.56 
  14  -7   5    0.25    0.52 
 -14  -7  -5    0.32    0.59 
 -13  -8   5    0.23    0.63 
 -13  -8   5   -1.11    0.81 
  13  -8  -5    0.06    0.55 
 -13   8   5   -0.12    0.62 
  12  -8  -5    0.01    0.53 
 -12  -8   5   -0.86    0.72 
 -12  -8   5    0.29    0.57 
 -12   8   5   -0.62    0.64 
 -11  -8   5    0.35    0.54 
 -11  -8   5    0.37    0.66 
  11  -8  -5    0.12    0.50 
 -11   8   5    0.61    0.57 
 -10  -8   5   -0.43    0.65 
  10  -8  -5    0.45    0.48 
 -10  -8   5    0.44    0.53 
   9  -8  -5    0.06    0.44 
  -9  -8   5    0.22    0.51 
  -9  -8   5   -0.09    0.56 
   8  -8  -5    0.46    0.44 
  -8  -8   5    0.07    0.49 
  -8  -8   5    0.38    0.51 
  -7  -8   5    1.48    0.49 
   7  -8  -5    1.36    0.43 
  -7  -8   5    0.86    0.52 
  -6  -8   5    0.26    0.45 
   6  -8  -5    1.02    0.37 
  -6  -8   5    0.80    0.46 
   5  -8  -5    0.51    0.39 
  -5  -8   5    0.81    0.45 
   5  -8  -5    0.98    0.32 
  -5  -8   5    0.76    0.42 
   4  -8  -5    2.92    0.36 
  -4  -8   5    3.06    0.43 
  -4  -8   5    1.96    0.42 
   4  -8  -5    2.97    0.40 
  -4   8   5    2.49    0.34 
   3  -8  -5   10.87    0.51 
  -3  -8   5   10.11    0.67 
  -3  -8   5    9.00    0.55 
  -3   8   5    9.40    0.58 
   2  -8  -5    2.05    0.36 
  -2  -8   5    1.91    0.45 
  -2  -8   5    1.39    0.40 
  -2   8   5    1.49    0.33 
   1  -8  -5    1.82    0.35 
  -1  -8   5    2.47    0.25 
  -1  -8   5    2.26    0.40 
  -1  -8   5    2.14    0.41 
  -1   8   5    2.29    0.32 
   0  -8   5    6.99    0.45 
   0  -8   5    7.73    0.53 
   0  -8  -5    7.75    0.51 
   0   8   5    7.77    0.49 
  -1  -8  -5    2.05    0.27 
   1  -8   5    1.98    0.41 
  -1  -8  -5    1.92    0.39 
   1  -8   5    1.72    0.26 
   1   8   5    1.19    0.28 
   2  -8   5    0.39    0.27 
   2  -8   5    0.03    0.35 
  -2  -8  -5    0.13    0.38 
  -2  -8  -5    0.09    0.25 
   2   8   5   -0.36    0.25 
   3  -8   5    1.22    0.28 
  -3  -8  -5    1.33    0.40 
   3  -8   5    1.33    0.42 
   3   8   5    1.43    0.27 
  -4  -8  -5    4.15    0.46 
   4  -8   5    5.62    0.36 
   4  -8   5    4.78    0.48 
   4   8   5    5.07    0.31 
   5  -8   5    4.04    0.48 
  -5  -8  -5    5.08    0.48 
   5  -8   5    3.67    0.36 
   5   8   5    4.57    0.29 
   6  -8   5    0.09    0.45 
  -6  -8  -5    0.60    0.40 
   6  -8   5   -0.05    0.35 
   6   8   5    0.17    0.26 
   7  -8   5    2.17    0.46 
  -7  -8  -5    1.79    0.49 
   7  -8   5    2.49    0.39 
  -8  -8  -5    0.35    0.44 
   8  -8   5    0.69    0.39 
   9  -8   5    2.17    0.43 
  -9  -8  -5    2.70    0.53 
 -10  -8  -5    1.52    0.54 
  10  -8   5    1.24    0.45 
 -11  -8  -5    1.86    0.58 
  11  -8   5    3.67    0.50 
  12  -8   5    0.94    0.50 
 -12  -8  -5   -0.01    0.56 
  13  -8   5    0.35    0.47 
 -13  -8  -5   -0.04    0.61 
 -12  -9   5   -0.20    0.75 
 -12  -9   5    0.17    0.66 
  12  -9  -5   -0.36    0.56 
 -12   9   5   -0.37    0.63 
 -11  -9   5    0.24    0.64 
  11  -9  -5    0.54    0.55 
 -11  -9   5   -0.85    0.68 
 -11   9   5   -0.43    0.59 
 -10  -9   5    0.52    0.59 
  10  -9  -5    0.24    0.52 
 -10  -9   5   -0.63    0.63 
  -9  -9   5   -0.88    0.59 
  -9  -9   5    0.43    0.57 
   9  -9  -5   -0.30    0.50 
   8  -9  -5    1.85    0.50 
  -8  -9   5    1.93    0.58 
  -8  -9   5    2.01    0.56 
  -7  -9   5   -0.62    0.53 
  -7  -9   5   -0.27    0.52 
   7  -9  -5    0.49    0.47 
  -6  -9   5    1.11    0.52 
   6  -9  -5    1.23    0.46 
  -6  -9   5    0.67    0.51 
   5  -9  -5    0.94    0.44 
  -5  -9   5    0.26    0.45 
  -5  -9   5    0.62    0.46 
  -4  -9   5    5.67    0.56 
   4  -9  -5    5.21    0.44 
   4  -9  -5    5.92    0.49 
  -4  -9   5    5.49    0.51 
  -4   9   5    4.77    0.45 
  -3  -9   5    1.44    0.45 
   3  -9  -5    0.75    0.41 
  -3  -9   5    1.23    0.51 
  -3   9   5    0.62    0.37 
  -2  -9   5    2.97    0.47 
   2  -9  -5    2.43    0.42 
  -2  -9   5    2.68    0.46 
  -2   9   5    1.94    0.37 
  -1  -9   5    1.09    0.44 
   1  -9  -5    1.16    0.42 
  -1   9   5    1.91    0.35 
   0  -9  -5   -0.03    0.42 
   0  -9   5   -0.58    0.28 
   0  -9   5   -0.18    0.41 
   0   9   5   -0.30    0.31 
   1  -9   5   -0.42    0.31 
   1  -9   5    0.10    0.43 
  -1  -9  -5   -0.54    0.41 
   1   9   5    0.14    0.31 
   2  -9   5    7.08    0.54 
  -2  -9  -5    7.26    0.55 
   2  -9   5    6.80    0.41 
   2   9   5    6.69    0.38 
  -3  -9  -5    0.21    0.45 
   3  -9   5    0.52    0.33 
   3  -9   5    0.55    0.46 
   3   9   5    0.37    0.27 
  -4  -9  -5    1.57    0.47 
   4  -9   5    1.52    0.48 
   4  -9   5    1.86    0.35 
   4   9   5    1.10    0.29 
   5  -9   5   -0.21    0.47 
   5  -9   5    0.17    0.35 
  -5  -9  -5   -0.11    0.48 
   5   9   5   -0.26    0.26 
   6  -9   5    0.82    0.41 
   6  -9   5    1.11    0.50 
  -6  -9  -5    0.85    0.51 
   7  -9   5    0.08    0.40 
   7  -9   5    0.25    0.53 
  -7  -9  -5    0.34    0.52 
   8  -9   5    0.80    0.43 
  -8  -9  -5    0.11    0.54 
   9  -9   5    0.42    0.45 
  -9  -9  -5    0.43    0.56 
 -10  -9  -5    0.63    0.59 
  10  -9   5    0.53    0.49 
  11  -9   5    0.37    0.52 
 -11  -9  -5    0.07    0.60 
  12  -9   5   -0.05    0.54 
 -12  -9  -5    0.60    0.64 
 -11 -10   5    0.42    0.66 
  11 -10  -5    0.10    0.53 
 -11 -10   5   -1.05    0.72 
 -11  10   5   -0.85    0.66 
  10 -10  -5   -0.02    0.56 
 -10 -10   5   -1.62    0.72 
 -10 -10   5    0.23    0.63 
  -9 -10   5    0.33    0.66 
   9 -10  -5    0.79    0.50 
  -9 -10   5    0.09    0.62 
   8 -10  -5    0.53    0.54 
  -8 -10   5   -0.31    0.60 
  -8 -10   5   -0.67    0.61 
  -7 -10   5    0.97    0.59 
  -7 -10   5   -0.16    0.59 
   7 -10  -5    0.29    0.51 
   6 -10  -5    0.25    0.50 
  -6 -10   5    0.97    0.58 
  -6 -10   5    0.35    0.55 
  -5 -10   5    0.51    0.55 
  -5 -10   5   -0.14    0.53 
   5 -10  -5    0.17    0.48 
  -5  10   5    0.55    0.45 
  -4 -10   5    1.06    0.56 
  -4 -10   5   -0.18    0.47 
  -4  10   5   -0.64    0.41 
  -3 -10   5   -0.55    0.49 
  -3 -10   5   -0.42    0.46 
   3 -10  -5   -0.35    0.43 
  -3  10   5   -0.67    0.40 
  -2 -10   5    0.30    0.54 
  -2 -10   5    0.12    0.50 
   2 -10  -5    0.21    0.45 
  -2  10   5   -0.30    0.39 
   1 -10  -5    0.62    0.44 
  -1 -10   5    0.58    0.48 
  -1  10   5    0.12    0.40 
   0 -10   5    0.28    0.51 
   0 -10  -5   -0.04    0.49 
   0  10   5   -0.58    0.34 
   1 -10   5    0.49    0.48 
  -1 -10  -5   -0.07    0.50 
   1  10   5   -0.75    0.35 
   2 -10   5    0.73    0.39 
   2 -10   5    1.54    0.51 
  -2 -10  -5    0.68    0.49 
   2  10   5    1.00    0.34 
  -3 -10  -5    0.25    0.54 
   3 -10   5   -0.16    0.51 
   3 -10   5   -0.06    0.38 
   3  10   5    0.04    0.33 
   4 -10   5    3.04    0.44 
  -4 -10  -5    3.52    0.56 
   4 -10   5    4.06    0.55 
  -5 -10  -5    2.72    0.57 
   5 -10   5    2.73    0.46 
   5 -10   5    2.76    0.57 
   6 -10   5    0.88    0.56 
   6 -10   5    0.21    0.43 
  -6 -10  -5    1.02    0.57 
   7 -10   5    0.85    0.48 
   7 -10   5    0.75    0.58 
  -7 -10  -5    0.11    0.56 
   8 -10   5   -0.61    0.49 
  -8 -10  -5   -0.81    0.58 
   9 -10   5   -0.46    0.49 
  -9 -10  -5   -0.52    0.59 
 -10 -10  -5   -0.70    0.62 
  10 -10   5   -0.46    0.52 
 -11 -10  -5    0.24    0.66 
  11 -10   5   -0.09    0.54 
  -9 -11   5   -1.00    0.65 
  -9 -11   5    0.22    0.68 
   9 -11  -5    0.14    0.61 
  -8 -11   5   -0.38    0.66 
   8 -11  -5    0.16    0.58 
  -8 -11   5    1.05    0.67 
  -7 -11   5    0.57    0.65 
   7 -11  -5    1.76    0.57 
  -7 -11   5   -0.97    0.62 
  -7  11   5    0.25    0.53 
  -6 -11   5    0.08    0.56 
  -6 -11   5   -0.31    0.63 
   6 -11  -5    0.38    0.55 
  -6  11   5   -0.26    0.50 
  -5 -11   5    0.31    0.63 
  -5 -11   5    0.80    0.59 
  -5  11   5   -0.63    0.47 
  -4 -11   5    1.45    0.64 
  -4 -11   5    0.94    0.57 
  -4  11   5    0.69    0.48 
  -3 -11   5   -0.03    0.52 
  -3 -11   5    0.79    0.61 
   3 -11  -5    0.83    0.50 
  -3  11   5    0.21    0.45 
   2 -11  -5   -0.24    0.51 
  -2 -11   5    0.04    0.51 
  -2  11   5    0.19    0.43 
  -1 -11   5    0.43    0.55 
   1 -11  -5   -0.04    0.53 
  -1  11   5   -0.55    0.43 
   0 -11  -5    0.18    0.54 
   0 -11   5   -1.29    0.54 
   0  11   5   -0.59    0.41 
  -1 -11  -5   -0.09    0.57 
   1 -11   5   -0.44    0.52 
   1  11   5   -0.75    0.38 
   2 -11   5    0.26    0.53 
  -2 -11  -5   -0.60    0.54 
   2  11   5   -0.19    0.36 
  -3 -11  -5    2.49    0.59 
   3 -11   5    2.51    0.46 
   3 -11   5    2.78    0.58 
  -4 -11  -5   -0.53    0.57 
   4 -11   5    0.18    0.46 
   4 -11   5    0.15    0.56 
   5 -11   5   -0.31    0.58 
   5 -11   5    0.14    0.45 
  -5 -11  -5   -0.69    0.59 
   6 -11   5    1.96    0.54 
   6 -11   5    2.76    0.64 
  -6 -11  -5    2.25    0.65 
   7 -11   5    1.78    0.64 
   7 -11   5   -0.42    0.53 
  -7 -11  -5   -0.01    0.64 
  -8 -11  -5    0.01    0.66 
   8 -11   5    0.33    0.54 
  -9 -11  -5    0.52    0.69 
   9 -11   5   -0.45    0.55 
  -6 -12   5    0.10    0.62 
  -6 -12   5    0.99    0.71 
  -6  12   5   -0.60    0.53 
  -5 -12   5    0.50    0.63 
  -5 -12   5    1.27    0.70 
  -5  12   5   -0.80    0.56 
  -4 -12   5   -0.26    0.57 
  -4 -12   5    0.50    0.68 
  -4  12   5   -0.25    0.50 
  -3 -12   5    0.46    0.57 
  -3  12   5   -1.12    0.51 
  -2 -12   5   -0.60    0.56 
   2 -12  -5   -1.33    0.57 
  -2  12   5   -0.72    0.47 
   1 -12  -5    0.29    0.60 
  -1 -12   5   -0.48    0.56 
  -1  12   5   -0.24    0.45 
   0 -12  -5    0.57    0.59 
   0 -12   5    0.31    0.62 
   0  12   5    0.75    0.46 
   1 -12   5   -0.32    0.57 
  -1 -12  -5   -0.28    0.58 
  -2 -12  -5   -0.53    0.60 
   2 -12   5    0.28    0.62 
  -3 -12  -5    0.14    0.67 
   3 -12   5    0.53    0.60 
   4 -12   5    0.53    0.66 
  -4 -12  -5    0.57    0.70 
  -5 -12  -5   -0.38    0.68 
   5 -12   5    0.29    0.63 
   5 -12   5   -0.48    0.52 
   6 -12   5   -0.22    0.56 
   6 -12   5    1.38    0.72 
  -6 -12  -5   -0.10    0.69 
 -17   0   6    1.03    0.60 
 -16   0   6    2.09    0.59 
 -15   0   6    0.14    0.54 
 -14   0   6    6.24    0.59 
  14   0  -6    5.85    0.44 
  13   0  -6   -0.02    0.34 
 -13   0   6    1.43    0.49 
 -12   0   6   17.48    0.80 
  12   0  -6   18.03    0.64 
 -11   0   6    0.25    0.41 
  11   0  -6   -0.17    0.28 
  10   0  -6    8.06    0.46 
 -10   0   6    8.55    0.61 
  -9   0   6    0.19    0.35 
   9   0  -6   -0.17    0.23 
  -8   0   6   12.51    0.59 
   8   0  -6   12.76    0.44 
  -7   0   6   -0.19    0.28 
   7   0  -6    0.18    0.19 
   6   0  -6   49.75    1.04 
  -6   0   6   52.22    1.27 
  -5   0   6    0.26    0.23 
  -5   0   6    0.17    0.14 
  -4   0   6    0.14    0.19 
  -4   0   6    0.36    0.13 
  -3   0   6   -0.08    0.17 
  -3   0   6    0.13    0.11 
  -2   0   6    2.07    0.17 
  -2   0   6    1.68    0.13 
  -1   0   6    0.10    0.12 
  -1   0   6    0.02    0.10 
   0   0   6   -0.08    0.11 
   0   0   6    0.11    0.09 
   1   0   6   -0.08    0.11 
   1   0   6    0.09    0.10 
   2   0   6  148.77    3.29 
   2   0   6  149.11    2.84 
   3   0   6   -0.02    0.11 
   3   0   6    0.15    0.14 
   4   0   6  150.40    2.90 
   4   0   6  152.45    3.36 
   5   0   6    0.28    0.14 
   6   0   6   49.20    1.01 
  -7   0  -6    0.00    0.22 
   7   0   6    0.32    0.19 
  -8   0  -6    7.31    0.42 
   8   0   6    7.61    0.39 
   9   0   6    0.18    0.24 
  -9   0  -6    0.05    0.29 
  10   0   6    1.40    0.27 
 -10   0  -6    1.87    0.30 
 -10   0  -6    1.59    0.31 
 -11   0  -6    0.23    0.32 
  11   0   6   -0.11    0.28 
 -11   0  -6    0.53    0.34 
  12   0   6    1.27    0.32 
 -12   0  -6    0.96    0.37 
 -12   0  -6    1.63    0.40 
 -13   0  -6   -0.28    0.38 
  13   0   6   -0.10    0.33 
 -13   0  -6    0.12    0.39 
  14   0   6    1.90    0.40 
 -14   0  -6    1.70    0.47 
 -14   0  -6    1.94    0.44 
 -15   0  -6    0.45    0.46 
  15   0   6   -0.42    0.38 
 -15   0  -6    0.41    0.50 
 -16   0  -6    0.08    0.54 
  16   0   6   -0.27    0.42 
  17   0   6   -0.27    0.44 
 -17   0  -6   -0.26    0.59 
 -17  -1   6    0.76    0.62 
 -17   1   6    1.23    0.62 
  16  -1  -6    0.56    0.47 
 -16  -1   6    1.47    0.57 
 -16   1   6    0.94    0.59 
 -15  -1   6    0.84    0.54 
  15  -1  -6    1.53    0.44 
 -15   1   6    1.78    0.58 
 -14  -1   6    0.05    0.50 
  14  -1  -6    0.02    0.37 
 -14   1   6    0.32    0.52 
  13  -1  -6   -0.34    0.36 
 -13  -1   6    0.27    0.48 
 -13   1   6   -0.11    0.49 
  13   1  -6    0.01    0.32 
 -12  -1   6    0.91    0.45 
  12  -1  -6    0.07    0.33 
 -12   1   6    0.27    0.45 
  12   1  -6    0.23    0.27 
  11  -1  -6    1.45    0.32 
 -11  -1   6    2.01    0.44 
  11   1  -6    2.01    0.28 
 -11   1   6    2.79    0.44 
  10  -1  -6    6.21    0.44 
 -10  -1   6    7.17    0.60 
 -10  -1   6    6.07    0.41 
 -10   1   6    7.43    0.59 
  10   1  -6    6.82    0.39 
   9  -1  -6   12.14    0.50 
  -9  -1   6   11.29    0.55 
  -9  -1   6   10.73    0.44 
   9   1  -6   11.19    0.42 
  -9   1   6   10.85    0.60 
   8  -1  -6   -0.21    0.22 
  -8  -1   6    0.12    0.29 
  -8  -1   6   -0.06    0.22 
   8   1  -6    0.04    0.18 
  -8   1   6    0.04    0.30 
  -7  -1   6    0.74    0.21 
   7  -1  -6    1.05    0.22 
  -7  -1   6    1.15    0.31 
   7   1  -6    0.99    0.18 
  -7   1   6    0.84    0.28 
   6  -1  -6   99.74    1.96 
  -6  -1   6   98.22    1.92 
  -6  -1   6   99.22    2.31 
  -6   1   6  100.26    2.30 
   5  -1  -6  152.79    2.95 
  -5  -1   6  149.34    3.47 
  -5  -1   6  150.05    2.93 
  -5   1   6  157.30    3.46 
  -5   1   6  157.97    2.95 
  -4  -1   6  220.23    4.92 
  -4  -1   6  220.38    4.18 
  -4   1   6  217.42    4.20 
  -4   1   6  225.63    4.92 
  -3  -1   6    4.22    0.21 
  -3  -1   6    3.91    0.30 
  -3   1   6    4.19    0.25 
  -3   1   6    4.06    0.31 
  -2  -1   6   15.88    0.45 
  -2  -1   6   16.03    0.37 
  -2   1   6   15.59    0.45 
  -2   1   6   16.07    0.40 
  -1  -1   6   23.40    0.50 
  -1  -1   6   23.82    0.60 
  -1   1   6   23.87    0.53 
  -1   1   6   23.19    0.58 
   0  -1   6    5.77    0.25 
   0  -1   6    5.62    0.22 
   0   1   6    5.94    0.24 
   0   1   6    6.29    0.20 
   1  -1   6   26.74    0.65 
   1  -1   6   25.89    0.56 
   1   1   6   26.47    0.61 
   1   1   6   26.52    0.57 
   2  -1   6   15.85    0.43 
   2  -1   6   16.22    0.39 
   2   1   6   16.51    0.39 
   2   1   6   15.38    0.38 
   3  -1   6   66.01    1.29 
   3  -1   6   66.16    1.49 
   3   1   6   64.22    1.29 
  -4  -1  -6    7.85    0.37 
   4  -1   6    8.16    0.32 
   4  -1   6    7.64    0.31 
   4   1   6    8.25    0.31 
   5  -1   6    3.04    0.25 
   5  -1   6    3.69    0.24 
  -5  -1  -6    3.34    0.22 
   5   1   6    3.16    0.19 
  -6  -1  -6    5.69    0.39 
   6  -1   6    6.47    0.32 
   6   1   6    5.35    0.31 
   7  -1   6   28.45    0.67 
  -7  -1  -6   29.33    0.76 
   7   1   6   29.38    0.68 
  -8  -1  -6    2.31    0.24 
  -8  -1  -6    1.82    0.26 
   8  -1   6    1.67    0.21 
   8   1   6    1.45    0.23 
  -9  -1  -6    0.31    0.25 
   9  -1   6    0.16    0.25 
  -9  -1  -6    0.43    0.28 
   9   1   6    0.66    0.23 
  -9   1  -6    0.39    0.26 
 -10  -1  -6   11.13    0.53 
  10  -1   6   10.61    0.49 
 -10  -1  -6   11.28    0.57 
  10   1   6   11.13    0.47 
 -10   1  -6   11.50    0.56 
 -11  -1  -6    1.84    0.34 
  11  -1   6    1.74    0.31 
 -11  -1  -6    1.90    0.34 
 -11   1  -6    1.74    0.35 
  11   1   6    1.36    0.29 
 -12  -1  -6    9.35    0.56 
 -12  -1  -6    9.89    0.56 
  12  -1   6    9.59    0.53 
 -12   1  -6   10.01    0.61 
 -12   1  -6   10.74    0.58 
  12   1   6    9.50    0.50 
  13  -1   6    3.57    0.39 
 -13  -1  -6    4.97    0.46 
 -13  -1  -6    5.04    0.48 
 -13   1  -6    4.94    0.43 
  13   1   6    5.19    0.38 
 -13   1  -6    5.00    0.48 
 -14  -1  -6    1.21    0.42 
  14  -1   6    0.25    0.38 
 -14  -1  -6    1.24    0.47 
 -14   1  -6    1.08    0.47 
 -14   1  -6    0.63    0.41 
  14   1   6    0.91    0.38 
 -15  -1  -6    1.30    0.52 
 -15  -1  -6    1.28    0.49 
  15  -1   6    1.25    0.42 
 -15   1  -6    1.20    0.51 
 -15   1  -6    1.04    0.44 
  15   1   6    0.57    0.39 
 -16  -1  -6    0.31    0.51 
  16  -1   6    0.40    0.43 
 -16  -1  -6    0.70    0.55 
  16   1   6    0.31    0.40 
 -16   1  -6   -0.14    0.51 
 -17  -1  -6    0.97    0.58 
  17  -1   6    1.10    0.50 
 -17   1  -6    0.69    0.61 
  17   1   6    1.00    0.47 
  17  -2  -6    0.95    0.53 
 -17  -2   6    1.12    0.60 
 -17   2   6   -0.04    0.63 
 -16  -2   6    1.32    0.56 
  16  -2  -6    0.23    0.50 
 -16   2   6   -0.01    0.60 
  15  -2  -6    0.41    0.46 
 -15  -2   6    0.94    0.55 
 -15   2   6    0.66    0.57 
 -14  -2   6    0.40    0.51 
  14  -2  -6    0.41    0.43 
 -14   2   6    0.89    0.53 
 -13  -2   6    8.53    0.63 
  13  -2  -6    7.77    0.56 
 -13   2   6    7.46    0.60 
 -12  -2   6    1.17    0.47 
  12  -2  -6    0.52    0.35 
 -12   2   6    0.88    0.45 
  11  -2  -6   13.78    0.58 
 -11  -2   6   15.22    0.76 
 -11  -2   6   14.72    0.57 
 -11   2   6   14.93    0.73 
  11   2  -6   14.86    0.51 
 -10  -2   6   18.26    0.59 
  10  -2  -6   16.12    0.60 
 -10  -2   6   17.44    0.77 
 -10   2   6   17.37    0.73 
  10   2  -6   17.04    0.51 
  -9  -2   6    5.59    0.47 
   9  -2  -6    5.73    0.35 
  -9  -2   6    5.43    0.42 
  -9   2   6    5.41    0.41 
   9   2  -6    4.93    0.33 
  -8  -2   6   33.90    0.71 
  -8  -2   6   34.23    1.00 
  -8  -2   6   33.32    0.83 
   8  -2  -6   31.91    0.80 
  -8   2   6   31.86    0.93 
  -7  -2   6   15.09    0.49 
  -7  -2   6   15.46    0.40 
  -7  -2   6   14.15    0.63 
   7  -2  -6   14.79    0.49 
  -7   2   6   14.98    0.56 
  -6  -2   6   23.79    0.53 
  -6  -2   6   24.19    0.63 
  -6  -2   6   22.80    0.76 
   6  -2  -6   23.75    0.61 
  -6   2   6   24.31    0.71 
   5  -2  -6    0.48    0.18 
  -5  -2   6    0.12    0.25 
  -5   2   6    0.28    0.22 
   4  -2  -6    7.51    0.27 
  -4  -2   6    7.99    0.38 
  -4  -2   6    8.39    0.25 
  -4   2   6    7.80    0.35 
  -4   2   6    8.37    0.34 
  -3  -2   6   30.93    0.81 
   3  -2  -6   32.82    0.71 
  -3  -2   6   31.26    0.64 
  -3   2   6   31.49    0.70 
  -3   2   6   31.48    0.79 
   2  -2  -6    4.28    0.25 
  -2  -2   6    4.68    0.27 
  -2  -2   6    4.67    0.20 
  -2   2   6    4.25    0.24 
  -2   2   6    4.90    0.27 
   1  -2  -6   56.37    1.18 
  -1  -2   6   54.02    1.27 
  -1  -2   6   53.84    1.07 
  -1   2   6   55.37    1.09 
  -1   2   6   53.09    1.24 
   0  -2  -6    3.99    0.29 
   0  -2   6    4.90    0.25 
   0  -2   6    4.58    0.20 
   0   2   6    4.74    0.25 
   0   2   6    4.64    0.18 
  -1  -2  -6    3.68    0.28 
   1  -2   6    4.05    0.20 
   1  -2   6    4.19    0.24 
   1   2   6    4.00    0.25 
   2  -2   6    9.79    0.30 
   2  -2   6    9.46    0.33 
  -2  -2  -6    9.64    0.37 
   2   2   6    8.98    0.31 
  -3  -2  -6   66.58    1.43 
  -3  -2  -6   64.08    1.44 
   3  -2   6   63.95    1.28 
   3  -2   6   65.54    1.50 
   3   2   6   65.05    1.29 
   4  -2   6    0.61    0.14 
  -4  -2  -6    0.56    0.11 
   4  -2   6    0.57    0.21 
  -4  -2  -6    0.66    0.18 
   4   2   6    0.44    0.15 
   5  -2   6   42.42    1.03 
  -5  -2  -6   42.36    0.99 
   5  -2   6   41.95    0.89 
  -5  -2  -6   43.20    1.00 
   5   2   6   42.39    0.89 
  -6  -2  -6    1.13    0.19 
  -6  -2  -6    0.56    0.23 
   6  -2   6    0.92    0.20 
   6   2   6    0.74    0.17 
  -7  -2  -6    5.66    0.37 
  -7  -2  -6    5.67    0.38 
   7  -2   6    5.19    0.38 
   7   2   6    5.40    0.33 
   8  -2   6    4.52    0.28 
  -8  -2  -6    4.49    0.31 
  -8  -2  -6    3.43    0.31 
   8   2   6    3.89    0.25 
   9  -2   6   13.66    0.51 
  -9  -2  -6   12.99    0.56 
  -9  -2  -6   12.31    0.54 
   9   2   6   12.87    0.46 
  10  -2   6    0.86    0.26 
 -10  -2  -6    0.81    0.34 
 -10  -2  -6    1.27    0.34 
  10   2   6    0.48    0.25 
  11  -2   6    1.32    0.32 
 -11  -2  -6    1.06    0.36 
 -11  -2  -6    1.07    0.36 
 -11   2  -6    0.84    0.33 
  11   2   6    0.32    0.28 
 -12  -2  -6    1.01    0.39 
  12  -2   6    0.74    0.34 
 -12  -2  -6    1.21    0.40 
 -12   2  -6    0.54    0.37 
  12   2   6    1.15    0.31 
 -13  -2  -6    2.96    0.47 
  13  -2   6    2.59    0.36 
 -13  -2  -6    2.73    0.46 
 -13   2  -6    2.84    0.46 
 -13   2  -6    2.88    0.40 
  13   2   6    2.68    0.36 
 -14  -2  -6   -0.04    0.46 
 -14  -2  -6    0.33    0.47 
  14  -2   6    0.52    0.39 
 -14   2  -6   -0.02    0.40 
 -14   2  -6   -0.16    0.48 
  14   2   6    0.27    0.34 
 -15  -2  -6    2.89    0.54 
  15  -2   6    1.81    0.44 
 -15  -2  -6    3.11    0.53 
  15   2   6    2.42    0.40 
 -15   2  -6    2.01    0.55 
 -16  -2  -6    0.68    0.54 
  16  -2   6    0.21    0.46 
 -16   2  -6   -1.01    0.57 
  16   2   6   -0.61    0.42 
 -16  -3   6    0.35    0.57 
  16  -3  -6    0.51    0.49 
 -16   3   6    0.62    0.63 
  15  -3  -6   -0.17    0.45 
 -15  -3   6    0.06    0.56 
 -15   3   6    0.88    0.59 
 -14  -3   6    3.89    0.59 
  14  -3  -6    3.04    0.46 
 -14   3   6    3.21    0.58 
  13  -3  -6    0.10    0.42 
 -13  -3   6    1.03    0.56 
 -13   3   6    0.79    0.49 
 -12  -3   6    9.86    0.60 
  12  -3  -6    8.96    0.58 
 -12  -3   6   10.26    0.74 
 -12   3   6   10.41    0.72 
 -11  -3   6    1.78    0.36 
  11  -3  -6    1.60    0.35 
 -11  -3   6    1.52    0.47 
 -11   3   6    1.67    0.43 
 -10  -3   6    6.03    0.48 
  10  -3  -6    6.45    0.40 
 -10  -3   6    6.64    0.54 
 -10   3   6    8.49    0.59 
  -9  -3   6    0.13    0.32 
   9  -3  -6   -0.16    0.29 
  -9  -3   6    0.61    0.42 
  -9   3   6    0.48    0.34 
  -8  -3   6    0.80    0.39 
  -8  -3   6    1.87    0.14 
   8  -3  -6    1.60    0.29 
  -8  -3   6    1.47    0.30 
  -8   3   6    1.72    0.32 
  -7  -3   6   11.64    0.62 
  -7  -3   6   12.63    0.33 
   7  -3  -6   12.27    0.50 
  -7  -3   6   12.62    0.50 
  -7   3   6   12.90    0.55 
  -6  -3   6    1.21    0.11 
  -6  -3   6    0.99    0.25 
   6  -3  -6    0.68    0.24 
  -6  -3   6    0.52    0.32 
  -6   3   6    1.38    0.25 
   5  -3  -6   51.05    1.09 
  -5  -3   6   51.82    0.99 
  -5  -3   6   50.25    1.17 
  -5  -3   6   50.59    1.27 
  -5   3   6   50.67    1.21 
   4  -3  -6   26.97    0.62 
   4  -3  -6   28.01    0.67 
  -4  -3   6   26.87    0.71 
  -4  -3   6   26.71    0.74 
  -4  -3   6   26.79    0.56 
  -4   3   6   28.18    0.66 
  -4   3   6   28.09    0.70 
   3  -3  -6  118.10    2.45 
  -3  -3   6  115.99    2.23 
  -3  -3   6  117.60    2.67 
  -3   3   6  116.40    2.30 
  -3   3   6  119.33    2.63 
  -2  -3   6   -0.02    0.09 
  -2  -3   6    0.17    0.21 
   2  -3  -6    0.04    0.14 
  -2   3   6   -0.08    0.14 
  -2   3   6   -0.07    0.14 
  -1  -3   6    9.96    0.28 
  -1  -3   6    9.66    0.38 
   1  -3  -6   10.53    0.35 
  -1   3   6   10.12    0.36 
  -1   3   6   10.01    0.31 
   0  -3  -6   89.10    1.89 
   0  -3   6   90.48    2.04 
   0  -3   6   88.73    1.72 
   0   3   6   89.27    1.74 
   0   3   6   87.56    1.97 
  -1  -3  -6    6.24    0.33 
   1  -3   6    6.27    0.26 
   1  -3   6    6.11    0.31 
   1   3   6    6.45    0.29 
   2  -3   6   42.80    0.89 
   2  -3   6   43.14    1.05 
  -2  -3  -6   44.28    1.00 
   2   3   6   43.44    0.89 
   3  -3   6    5.32    0.28 
  -3  -3  -6    4.93    0.36 
   3  -3   6    5.16    0.31 
   3   3   6    4.64    0.29 
   4  -3   6    0.34    0.16 
   4  -3   6    0.18    0.23 
  -4  -3  -6    0.42    0.19 
   4   3   6    0.09    0.14 
   5  -3   6   29.80    0.69 
   5  -3   6   29.41    0.78 
  -5  -3  -6   29.54    0.74 
  -5  -3  -6   29.05    0.75 
   5   3   6   29.75    0.67 
  -6  -3  -6   31.24    0.81 
   6  -3   6   31.35    0.72 
  -6  -3  -6   26.63    0.79 
   6  -3   6   30.54    0.81 
   6   3   6   31.03    0.68 
  -7  -3  -6    1.70    0.28 
  -7  -3  -6    2.92    0.30 
   7  -3   6    2.75    0.23 
   7   3   6    2.97    0.22 
   8  -3   6   33.62    0.80 
  -8  -3  -6   28.70    0.92 
  -8  -3  -6   33.95    0.89 
   8   3   6   32.44    0.74 
   9  -3   6    3.19    0.29 
  -9  -3  -6    3.70    0.36 
  -9  -3  -6    3.76    0.38 
   9   3   6    3.39    0.27 
 -10  -3  -6    1.32    0.36 
 -10  -3  -6    1.08    0.36 
  10  -3   6    1.18    0.32 
  10   3   6    0.63    0.26 
 -11  -3  -6    6.80    0.48 
 -11  -3  -6    7.80    0.65 
  11  -3   6    8.08    0.54 
  11   3   6    7.32    0.47 
 -12  -3  -6    6.19    0.51 
  12  -3   6    5.64    0.39 
 -12  -3  -6    5.38    0.46 
 -12   3  -6    6.24    0.42 
  12   3   6    4.67    0.36 
 -13  -3  -6    1.53    0.46 
 -13  -3  -6    0.67    0.46 
  13  -3   6    0.46    0.39 
  13   3   6    0.19    0.31 
 -13   3  -6    0.18    0.39 
  14  -3   6    0.07    0.40 
 -14  -3  -6    0.34    0.50 
  14   3   6   -0.19    0.35 
 -15  -3  -6    0.24    0.49 
  15  -3   6    0.53    0.40 
 -15   3  -6   -0.37    0.55 
  15   3   6    0.18    0.39 
  16  -3   6    0.56    0.48 
 -16  -3  -6    0.16    0.57 
 -16   3  -6    0.14    0.61 
  16  -4  -6   -0.29    0.52 
 -16  -4   6    1.36    0.67 
 -16   4   6   -0.94    0.63 
  15  -4  -6    0.43    0.49 
 -15  -4   6    0.76    0.60 
 -15   4   6    0.38    0.65 
 -14  -4   6    2.04    0.59 
  14  -4  -6    0.75    0.47 
 -14   4   6    1.14    0.58 
 -13  -4   6    1.15    0.47 
  13  -4  -6    0.89    0.44 
 -13  -4   6    1.26    0.58 
 -13   4   6    0.97    0.54 
  12  -4  -6    5.80    0.47 
 -12  -4   6    5.89    0.63 
 -12  -4   6    5.51    0.48 
 -12   4   6    6.00    0.56 
 -11  -4   6    1.22    0.52 
  11  -4  -6    1.19    0.38 
 -11  -4   6    0.70    0.40 
 -11   4   6    1.19    0.44 
 -10  -4   6    5.23    0.43 
 -10  -4   6    4.68    0.54 
  10  -4  -6    4.95    0.41 
 -10   4   6    5.52    0.46 
  -9  -4   6   29.85    1.03 
   9  -4  -6   30.42    0.84 
  -9  -4   6   30.90    0.88 
  -9   4   6   30.97    0.92 
  -8  -4   6   38.51    0.98 
  -8  -4   6   37.04    1.12 
   8  -4  -6   38.94    0.95 
  -8   4   6   38.82    1.04 
   7  -4  -6    8.68    0.49 
  -7  -4   6    8.29    0.55 
  -7  -4   6    7.43    0.47 
  -7   4   6    9.48    0.47 
  -6  -4   6    5.37    0.36 
  -6  -4   6    5.75    0.48 
   6  -4  -6    6.44    0.45 
  -6   4   6    6.01    0.43 
   5  -4  -6    3.57    0.21 
  -5  -4   6    4.20    0.33 
  -5  -4   6    3.95    0.36 
   5  -4  -6    4.13    0.30 
  -5   4   6    5.25    0.33 
   4  -4  -6    2.13    0.26 
   4  -4  -6    2.07    0.17 
  -4  -4   6    1.85    0.29 
  -4  -4   6    2.08    0.30 
  -4   4   6    2.22    0.24 
  -4   4   6    2.70    0.23 
  -3  -4   6    7.31    0.36 
   3  -4  -6    7.46    0.33 
  -3  -4   6    7.16    0.21 
  -3   4   6    7.51    0.32 
  -3   4   6    7.54    0.34 
   2  -4  -6  134.23    2.82 
  -2  -4   6  135.30    3.05 
  -2  -4   6  132.70    2.56 
  -2   4   6  136.88    2.62 
  -2   4   6  133.83    2.99 
  -1  -4   6   69.53    1.66 
   1  -4  -6   72.01    1.54 
  -1  -4   6   69.66    1.38 
  -1   4   6   71.91    1.42 
  -1   4   6   70.84    1.59 
   0  -4   6    9.87    0.40 
   0  -4   6   10.15    0.31 
   0  -4  -6   10.73    0.42 
   0   4   6    9.69    0.28 
   0   4   6    9.70    0.34 
   1  -4   6    4.45    0.34 
   1  -4   6    4.54    0.26 
  -1  -4  -6    4.29    0.26 
   1   4   6    4.04    0.22 
  -2  -4  -6   23.85    0.66 
   2  -4   6   23.42    0.67 
   2  -4   6   23.24    0.55 
   2   4   6   24.23    0.57 
   3  -4   6    7.95    0.39 
   3  -4   6    8.35    0.33 
  -3  -4  -6    8.03    0.44 
   3   4   6    7.76    0.34 
   4  -4   6   22.08    0.65 
  -4  -4  -6   21.36    0.66 
   4  -4   6   21.48    0.56 
   4   4   6   22.07    0.55 
  -5  -4  -6   21.08    0.66 
   5  -4   6   20.69    0.57 
   5  -4   6   20.97    0.64 
  -5  -4  -6   20.34    0.51 
   5   4   6   21.19    0.53 
   6  -4   6    1.70    0.22 
  -6  -4  -6    1.41    0.20 
  -6  -4  -6    1.62    0.30 
   6  -4   6    1.82    0.29 
   6   4   6    1.45    0.21 
   7  -4   6    0.54    0.25 
   7  -4   6    0.66    0.34 
  -7  -4  -6   -0.65    0.25 
  -7  -4  -6    0.53    0.31 
   7   4   6    0.03    0.20 
   8  -4   6    8.20    0.49 
  -8  -4  -6    8.60    0.44 
  -8  -4  -6    8.33    0.55 
   8   4   6    8.10    0.38 
   9  -4   6   12.12    0.54 
  -9  -4  -6    7.65    0.62 
  -9  -4  -6   11.97    0.61 
   9   4   6   11.69    0.46 
  10  -4   6    4.31    0.34 
 -10  -4  -6    4.85    0.43 
 -10  -4  -6    3.42    0.46 
  10   4   6    3.81    0.31 
 -11  -4  -6    0.89    0.41 
 -11  -4  -6   -0.43    0.43 
  11  -4   6    0.86    0.36 
  11   4   6    1.04    0.27 
 -12  -4  -6    3.09    0.49 
  12  -4   6    1.83    0.39 
  12   4   6    2.18    0.32 
 -13  -4  -6    0.61    0.47 
  13  -4   6    0.12    0.36 
  13   4   6    0.05    0.33 
 -13   4  -6    0.51    0.39 
 -14  -4  -6    5.84    0.59 
  14  -4   6    5.47    0.50 
  14   4   6    5.93    0.41 
  15  -4   6   -0.63    0.46 
 -15  -4  -6    0.29    0.56 
 -16  -4  -6    0.34    0.60 
  16  -4   6    1.02    0.51 
 -16   4  -6    0.55    0.64 
  16  -5  -6    0.16    0.58 
 -16  -5   6    1.23    0.69 
 -15  -5   6    2.72    0.69 
  15  -5  -6    1.90    0.53 
 -15   5   6    2.57    0.65 
 -14  -5   6    0.42    0.52 
 -14  -5   6    1.11    0.63 
  14  -5  -6   -0.23    0.49 
 -14   5   6    0.10    0.59 
  13  -5  -6    2.51    0.49 
 -13  -5   6    2.02    0.63 
 -13  -5   6    2.03    0.51 
 -13   5   6    2.26    0.56 
  12  -5  -6    0.04    0.44 
 -12  -5   6    0.13    0.58 
 -12  -5   6    0.22    0.47 
 -12   5   6    0.79    0.50 
  11  -5  -6    1.14    0.42 
 -11  -5   6    1.76    0.46 
 -11  -5   6    0.67    0.60 
 -11   5   6    1.73    0.49 
 -10  -5   6    0.61    0.42 
  10  -5  -6    0.78    0.39 
 -10  -5   6    0.31    0.51 
 -10   5   6    0.53    0.42 
  -9  -5   6   15.11    0.69 
  -9  -5   6   14.79    0.77 
   9  -5  -6   14.66    0.65 
  -9   5   6   16.15    0.70 
  -8  -5   6    1.75    0.39 
   8  -5  -6    1.45    0.31 
  -8  -5   6    1.61    0.47 
  -8   5   6    2.46    0.37 
  -7  -5   6   -0.51    0.39 
   7  -5  -6   -0.19    0.31 
  -7  -5   6    0.18    0.34 
  -7   5   6   -0.04    0.32 
  -6  -5   6    1.33    0.39 
  -6  -5   6    1.02    0.34 
   6  -5  -6    1.70    0.31 
  -6   5   6    2.14    0.29 
   5  -5  -6   -0.01    0.25 
   5  -5  -6    0.10    0.17 
  -5  -5   6   -0.24    0.32 
  -5  -5   6   -0.01    0.32 
  -5   5   6    0.32    0.25 
   4  -5  -6    0.16    0.19 
  -4  -5   6    0.14    0.31 
   4  -5  -6    0.23    0.27 
  -4  -5   6    0.09    0.30 
  -4   5   6   -0.13    0.24 
  -3  -5   6    8.40    0.44 
   3  -5  -6    8.26    0.39 
  -3  -5   6    8.11    0.48 
  -3  -5   6    7.07    0.24 
  -3   5   6    8.97    0.43 
  -2  -5   6    3.88    0.22 
  -2  -5   6    3.91    0.33 
   2  -5  -6    4.31    0.26 
  -2   5   6    4.23    0.27 
  -1  -5   6   34.67    0.73 
   1  -5  -6   36.06    0.87 
  -1  -5   6   35.36    0.93 
  -1   5   6   35.64    0.80 
   0  -5   6    0.17    0.14 
   0  -5  -6    0.21    0.23 
   0  -5   6   -0.48    0.25 
   0   5   6    0.14    0.20 
   1  -5   6   75.04    1.80 
  -1  -5  -6   77.17    1.70 
   1  -5   6   76.86    1.52 
   1   5   6   77.50    1.54 
  -2  -5  -6   10.04    0.49 
   2  -5   6    9.36    0.36 
   2  -5   6    9.40    0.45 
   2   5   6    9.06    0.38 
   3  -5   6   -0.26    0.28 
  -3  -5  -6    0.74    0.28 
   3  -5   6    0.20    0.18 
   3   5   6    0.11    0.19 
  -4  -5  -6    1.52    0.30 
   4  -5   6    1.72    0.32 
   4  -5   6    1.56    0.22 
   4   5   6    1.21    0.20 
  -5  -5  -6    9.99    0.30 
  -5  -5  -6    9.84    0.56 
   5  -5   6    9.87    0.41 
   5  -5   6    9.79    0.49 
   5   5   6    9.46    0.38 
   6  -5   6    6.25    0.39 
  -6  -5  -6    6.72    0.54 
  -6  -5  -6    6.03    0.27 
   6  -5   6    5.76    0.41 
   6   5   6    6.48    0.39 
   7  -5   6   46.70    1.06 
   7  -5   6   45.09    1.20 
  -7  -5  -6   45.56    1.18 
  -7  -5  -6   45.96    1.10 
   7   5   6   47.53    1.01 
   8  -5   6    0.82    0.30 
  -8  -5  -6    0.80    0.33 
   8   5   6    0.68    0.24 
   9  -5   6    3.54    0.36 
  -9  -5  -6    3.64    0.42 
   9   5   6    3.44    0.29 
  10  -5   6   -0.20    0.34 
 -10  -5  -6    0.50    0.41 
  10   5   6   -0.19    0.26 
 -11  -5  -6    9.57    0.68 
  11  -5   6   10.07    0.62 
  11   5   6    9.65    0.52 
 -12  -5  -6   -0.49    0.46 
  12  -5   6    0.02    0.39 
  12   5   6    0.09    0.31 
  13  -5   6   -0.51    0.42 
 -13  -5  -6    0.15    0.49 
  14  -5   6   -0.34    0.45 
 -14  -5  -6   -0.65    0.56 
 -15  -5  -6    0.75    0.56 
  15  -5   6    0.69    0.50 
  15  -6  -6    0.26    0.55 
 -15  -6   6    0.63    0.72 
 -15   6   6   -0.07    0.67 
  14  -6  -6    1.23    0.53 
 -14  -6   6    1.07    0.71 
 -14  -6   6    0.45    0.57 
 -14   6   6    0.73    0.66 
 -13  -6   6    0.44    0.72 
 -13  -6   6    0.74    0.55 
  13  -6  -6    0.56    0.49 
 -13   6   6    1.35    0.57 
 -12  -6   6   -1.00    0.62 
 -12  -6   6   -0.17    0.51 
  12  -6  -6   -0.43    0.41 
 -12   6   6    0.19    0.53 
  11  -6  -6   -0.24    0.43 
 -11  -6   6   -0.07    0.46 
 -11  -6   6   -0.15    0.61 
 -11   6   6   -0.02    0.49 
 -10  -6   6   -0.28    0.56 
 -10  -6   6    0.15    0.46 
  10  -6  -6   -0.39    0.36 
 -10   6   6    0.22    0.48 
  -9  -6   6    0.94    0.54 
  -9  -6   6    0.41    0.44 
   9  -6  -6    0.62    0.35 
  -9   6   6    0.55    0.44 
   8  -6  -6    9.52    0.61 
  -8  -6   6    7.99    0.66 
  -8  -6   6    8.32    0.59 
  -8   6   6    8.98    0.55 
  -7  -6   6   15.47    0.68 
   7  -6  -6   15.88    0.66 
  -7  -6   6   15.50    0.71 
  -7   6   6   15.73    0.64 
  -6  -6   6    3.39    0.41 
  -6  -6   6    3.57    0.45 
   6  -6  -6    3.49    0.37 
   5  -6  -6   19.62    0.68 
   5  -6  -6   20.02    0.55 
  -5  -6   6   20.36    0.72 
  -5  -6   6   20.37    0.73 
  -4  -6   6    2.91    0.39 
   4  -6  -6    2.95    0.34 
  -4  -6   6    2.54    0.38 
   4  -6  -6    2.36    0.26 
  -4   6   6    2.32    0.28 
  -3  -6   6    0.41    0.12 
  -3  -6   6    0.74    0.33 
  -3  -6   6    0.36    0.31 
   3  -6  -6    0.26    0.24 
  -3   6   6    0.33    0.24 
  -2  -6   6   17.77    0.44 
  -2  -6   6   18.79    0.64 
   2  -6  -6   18.14    0.56 
  -2   6   6   18.74    0.59 
  -1  -6   6   22.41    0.70 
  -1  -6   6   21.91    0.53 
   1  -6  -6   22.91    0.69 
  -1   6   6   21.64    0.60 
   0  -6  -6    1.40    0.28 
   0  -6   6    1.85    0.33 
   0  -6   6    1.01    0.17 
   0   6   6    1.16    0.24 
   1  -6   6    1.13    0.19 
  -1  -6  -6    0.91    0.29 
   1  -6   6    1.02    0.32 
   1   6   6    0.68    0.22 
   2  -6   6   -0.02    0.20 
   2  -6   6   -0.15    0.31 
  -2  -6  -6   -0.03    0.29 
   2   6   6   -0.07    0.21 
  -3  -6  -6    6.02    0.23 
  -3  -6  -6    5.87    0.39 
   3  -6   6    6.63    0.38 
   3  -6   6    6.11    0.46 
   3   6   6    5.62    0.37 
  -4  -6  -6    7.51    0.57 
   4  -6   6    7.41    0.44 
   4  -6   6    7.78    0.43 
   4   6   6    7.01    0.38 
   5  -6   6    7.60    0.51 
   5  -6   6    7.69    0.46 
  -5  -6  -6    7.45    0.60 
   5   6   6    7.51    0.42 
  -6  -6  -6    0.62    0.37 
   6  -6   6    1.63    0.39 
   6  -6   6    1.05    0.28 
   6   6   6    0.75    0.22 
   7  -6   6    4.26    0.35 
  -7  -6  -6    3.97    0.43 
   7  -6   6    4.98    0.46 
   7   6   6    4.99    0.29 
  -8  -6  -6    0.31    0.41 
   8  -6   6    0.52    0.33 
   8   6   6    0.41    0.24 
  -9  -6  -6    6.27    0.50 
   9  -6   6    7.24    0.44 
   9   6   6    6.14    0.42 
  10  -6   6   12.85    0.68 
 -10  -6  -6   10.53    0.71 
  10   6   6   11.14    0.49 
  11  -6   6    1.42    0.38 
 -11  -6  -6    0.72    0.48 
 -12  -6  -6    0.00    0.50 
  12  -6   6   -0.48    0.43 
  13  -6   6    2.75    0.49 
 -13  -6  -6    2.10    0.55 
 -14  -6  -6    0.24    0.56 
  14  -6   6   -0.29    0.47 
  15  -6   6    0.22    0.51 
 -15  -6  -6    1.28    0.60 
 -14  -7   6    0.67    0.81 
  14  -7  -6    0.39    0.55 
 -14  -7   6    0.25    0.62 
 -14   7   6    0.17    0.65 
 -13  -7   6    2.22    0.58 
 -13  -7   6    1.66    0.75 
  13  -7  -6    2.04    0.54 
 -13   7   6    2.53    0.64 
  12  -7  -6    0.21    0.45 
 -12  -7   6    0.81    0.57 
 -12  -7   6   -0.11    0.69 
 -12   7   6    0.11    0.59 
 -11  -7   6    0.94    0.68 
 -11  -7   6    2.06    0.56 
  11  -7  -6    1.23    0.48 
 -11   7   6    2.41    0.56 
 -10  -7   6    4.95    0.54 
 -10  -7   6    5.19    0.72 
  10  -7  -6    4.74    0.50 
 -10   7   6    5.33    0.55 
   9  -7  -6    0.44    0.38 
  -9  -7   6    0.36    0.60 
  -9  -7   6    0.30    0.46 
  -9   7   6    0.87    0.45 
   8  -7  -6   14.25    0.72 
  -8  -7   6   14.02    0.74 
  -8  -7   6   13.74    0.77 
  -8   7   6   14.97    0.69 
  -7  -7   6    0.92    0.44 
   7  -7  -6    0.53    0.39 
  -7  -7   6    0.50    0.47 
  -6  -7   6    2.51    0.46 
  -6  -7   6    2.49    0.45 
   6  -7  -6    2.79    0.40 
  -5  -7   6    0.07    0.39 
  -5  -7   6    0.12    0.40 
   5  -7  -6    0.08    0.25 
   5  -7  -6    0.36    0.32 
   4  -7  -6    3.28    0.32 
  -4  -7   6    2.64    0.39 
   4  -7  -6    3.73    0.39 
  -4  -7   6    3.60    0.42 
  -4   7   6    3.66    0.33 
  -3  -7   6    5.75    0.45 
  -3  -7   6    4.82    0.46 
   3  -7  -6    5.56    0.43 
  -3   7   6    5.64    0.37 
  -2  -7   6    8.56    0.36 
  -2  -7   6    9.74    0.48 
   2  -7  -6    9.67    0.47 
  -2   7   6    9.77    0.52 
   1  -7  -6   -0.31    0.31 
  -1  -7   6   -0.02    0.19 
  -1  -7   6    0.21    0.35 
  -1   7   6    0.06    0.27 
   0  -7   6   17.74    0.51 
   0  -7   6   18.03    0.67 
   0  -7  -6   18.34    0.61 
   0   7   6   17.99    0.60 
   1  -7   6    2.40    0.38 
  -1  -7  -6    2.35    0.36 
   1  -7   6    1.91    0.24 
   1   7   6    2.48    0.29 
   2  -7   6    5.17    0.29 
  -2  -7  -6    5.09    0.41 
  -2  -7  -6    4.51    0.27 
   2  -7   6    4.72    0.43 
   2   7   6    4.82    0.31 
   3  -7   6    3.98    0.43 
   3  -7   6    4.06    0.30 
  -3  -7  -6    3.89    0.41 
   3   7   6    3.14    0.28 
   4  -7   6    1.90    0.41 
   4  -7   6    2.33    0.29 
  -4  -7  -6    2.52    0.40 
   4   7   6    1.68    0.25 
  -5  -7  -6    1.63    0.40 
   5  -7   6    1.79    0.30 
   5  -7   6    1.51    0.41 
   5   7   6    1.47    0.24 
  -6  -7  -6    2.52    0.44 
   6  -7   6    3.06    0.45 
   6  -7   6    3.30    0.35 
   6   7   6    2.98    0.28 
  -7  -7  -6    0.65    0.39 
   7  -7   6    0.45    0.33 
   7  -7   6    0.73    0.45 
   7   7   6    0.86    0.26 
  -8  -7  -6    1.43    0.46 
   8  -7   6    1.56    0.34 
   8   7   6    1.58    0.29 
   9  -7   6    0.76    0.39 
  -9  -7  -6    0.87    0.47 
   9   7   6    0.18    0.27 
  10  -7   6    1.26    0.38 
 -10  -7  -6    1.16    0.49 
 -11  -7  -6    0.31    0.52 
  11  -7   6   -0.13    0.43 
  12  -7   6    0.86    0.47 
 -12  -7  -6    1.21    0.55 
 -13  -7  -6   -0.13    0.57 
  13  -7   6   -0.40    0.48 
 -14  -7  -6   -0.69    0.58 
  14  -7   6   -0.50    0.51 
  13  -8  -6   -0.67    0.54 
 -13  -8   6   -0.56    0.60 
 -13  -8   6   -0.73    0.83 
 -13   8   6   -0.38    0.63 
 -12  -8   6   -1.20    0.73 
  12  -8  -6   -0.19    0.53 
 -12  -8   6   -0.78    0.58 
 -12   8   6    0.84    0.62 
  11  -8  -6   -0.25    0.50 
 -11  -8   6   -0.11    0.56 
 -11  -8   6   -0.53    0.68 
 -11   8   6    0.05    0.56 
 -10  -8   6   -0.76    0.68 
 -10  -8   6    0.28    0.57 
  10  -8  -6   -0.10    0.48 
 -10   8   6   -0.04    0.56 
  -9  -8   6    0.20    0.51 
  -9  -8   6   -0.56    0.62 
   9  -8  -6   -0.60    0.45 
  -9   8   6   -0.24    0.50 
   8  -8  -6    1.43    0.45 
  -8  -8   6    1.19    0.52 
  -8  -8   6    1.02    0.55 
   7  -8  -6    0.35    0.39 
  -7  -8   6    0.09    0.50 
  -7  -8   6   -0.14    0.49 
   6  -8  -6    1.56    0.43 
  -6  -8   6    1.87    0.50 
  -6  -8   6    1.29    0.49 
   5  -8  -6    0.45    0.37 
  -5  -8   6    0.00    0.43 
  -5  -8   6    0.38    0.47 
  -5   8   6    0.64    0.38 
   4  -8  -6    6.06    0.45 
  -4  -8   6    5.75    0.52 
  -4  -8   6    6.03    0.51 
  -4   8   6    5.50    0.43 
  -3  -8   6    9.28    0.68 
   3  -8  -6    8.98    0.53 
  -3  -8   6    9.05    0.57 
  -3   8   6    8.90    0.58 
   2  -8  -6    0.07    0.36 
  -2  -8   6   -0.06    0.39 
  -2   8   6   -0.10    0.32 
  -1  -8   6   -0.07    0.39 
   1  -8  -6   -0.21    0.33 
  -1  -8   6   -0.26    0.22 
  -1   8   6   -0.62    0.30 
   0  -8  -6   12.90    0.61 
   0  -8   6   12.80    0.57 
   0  -8   6   11.77    0.49 
   0   8   6   12.26    0.57 
   1  -8   6    0.38    0.40 
   1  -8   6    0.61    0.25 
  -1  -8  -6    0.94    0.38 
   1   8   6    0.49    0.30 
  -2  -8  -6    0.82    0.39 
   2  -8   6    0.93    0.42 
   2  -8   6    0.96    0.28 
   2   8   6    1.01    0.29 
   3  -8   6   13.20    0.59 
   3  -8   6   12.81    0.66 
  -3  -8  -6   14.35    0.76 
   3   8   6   13.18    0.51 
   4  -8   6    2.38    0.32 
   4  -8   6    1.51    0.46 
  -4  -8  -6    2.39    0.45 
   4   8   6    1.39    0.28 
  -5  -8  -6    9.47    0.76 
   5  -8   6   10.50    0.64 
   5  -8   6   10.94    0.65 
   5   8   6   10.39    0.50 
   6  -8   6    0.40    0.46 
  -6  -8  -6    0.08    0.45 
   6  -8   6    0.20    0.33 
   6   8   6    0.18    0.26 
   7  -8   6    0.39    0.36 
   7  -8   6    0.82    0.50 
  -7  -8  -6    0.72    0.48 
   7   8   6    0.27    0.28 
  -8  -8  -6    3.10    0.53 
   8  -8   6    3.35    0.43 
   9  -8   6    2.61    0.44 
  -9  -8  -6    1.31    0.53 
 -10  -8  -6    0.91    0.55 
  10  -8   6    1.73    0.45 
  11  -8   6    0.01    0.48 
 -11  -8  -6    0.38    0.57 
  12  -8   6   -0.53    0.49 
 -12  -8  -6    0.23    0.63 
 -13  -8  -6   -0.03    0.61 
  13  -8   6   -0.43    0.52 
 -12  -9   6   -1.09    0.83 
 -12  -9   6    0.57    0.68 
  12  -9  -6    0.38    0.56 
 -12   9   6   -0.75    0.66 
 -11  -9   6   -0.78    0.76 
 -11  -9   6   -0.44    0.61 
  11  -9  -6    0.80    0.50 
 -11   9   6   -0.90    0.65 
 -10  -9   6   -0.12    0.59 
  10  -9  -6   -0.26    0.53 
 -10  -9   6   -0.72    0.65 
 -10   9   6    0.22    0.61 
  -9  -9   6    1.78    0.65 
  -9  -9   6    1.20    0.58 
   9  -9  -6    1.95    0.53 
   8  -9  -6    0.65    0.49 
  -8  -9   6    0.74    0.59 
  -8  -9   6   -0.05    0.56 
  -7  -9   6    0.62    0.54 
   7  -9  -6    0.41    0.48 
  -7  -9   6    1.06    0.55 
  -6  -9   6    0.32    0.53 
   6  -9  -6    0.34    0.46 
  -6  -9   6    0.15    0.51 
  -6   9   6   -0.44    0.43 
  -5  -9   6    2.25    0.50 
  -5  -9   6    2.76    0.56 
   5  -9  -6    2.47    0.48 
  -5   9   6    2.35    0.44 
  -4  -9   6    6.60    0.55 
  -4  -9   6    6.42    0.58 
   4  -9  -6    6.70    0.53 
  -4   9   6    5.85    0.46 
   3  -9  -6    1.01    0.38 
  -3  -9   6    1.21    0.51 
  -3  -9   6    0.64    0.45 
  -3   9   6    0.34    0.38 
  -2  -9   6    0.98    0.46 
   2  -9  -6    1.01    0.41 
  -2   9   6    1.14    0.37 
  -1  -9   6   -0.16    0.44 
   1  -9  -6   -0.44    0.41 
  -1   9   6    0.04    0.35 
   0  -9  -6    4.84    0.49 
   0  -9   6    5.79    0.55 
   0   9   6    5.82    0.40 
  -1  -9  -6    2.36    0.45 
   1  -9   6    1.56    0.47 
   1  -9   6    1.32    0.31 
   1   9   6    1.25    0.34 
   2  -9   6    0.32    0.31 
  -2  -9  -6    0.70    0.44 
   2  -9   6    0.09    0.46 
   2   9   6   -0.09    0.30 
   3  -9   6    1.15    0.47 
   3  -9   6    0.73    0.31 
  -3  -9  -6    1.59    0.47 
   3   9   6    0.49    0.31 
  -4  -9  -6    0.68    0.49 
   4  -9   6    0.83    0.36 
   4  -9   6    0.46    0.49 
   4   9   6    0.51    0.29 
  -5  -9  -6   -0.14    0.49 
   5  -9   6   -0.18    0.49 
   5  -9   6    0.06    0.38 
   5   9   6    0.20    0.29 
  -6  -9  -6    0.36    0.51 
   6  -9   6   -0.02    0.38 
   6  -9   6    0.32    0.51 
  -7  -9  -6   -0.55    0.53 
   7  -9   6    0.19    0.54 
   7  -9   6   -0.12    0.40 
   8  -9   6    0.15    0.43 
  -8  -9  -6   -0.51    0.53 
   9  -9   6    0.83    0.46 
  -9  -9  -6    0.53    0.56 
  10  -9   6   -0.31    0.48 
 -10  -9  -6   -0.45    0.59 
 -11  -9  -6    0.73    0.62 
  11  -9   6   -0.04    0.51 
  12  -9   6   -0.13    0.55 
 -12  -9  -6   -0.78    0.64 
 -10 -10   6   -0.53    0.76 
 -10 -10   6    0.35    0.66 
  10 -10  -6   -0.16    0.58 
 -10  10   6   -0.74    0.65 
  -9 -10   6    0.41    0.63 
   9 -10  -6    0.97    0.57 
  -9 -10   6   -0.21    0.70 
   8 -10  -6    0.12    0.54 
  -8 -10   6   -0.77    0.60 
  -8 -10   6   -0.59    0.61 
   7 -10  -6    0.13    0.53 
  -7 -10   6    0.35    0.59 
  -7 -10   6    0.52    0.58 
  -7  10   6    0.56    0.45 
  -6 -10   6   -0.18    0.57 
   6 -10  -6    0.65    0.52 
  -6 -10   6    0.23    0.59 
  -6  10   6   -0.11    0.48 
  -5 -10   6   -0.08    0.55 
  -5 -10   6   -0.12    0.51 
  -5  10   6   -0.19    0.45 
  -4 -10   6    0.96    0.51 
  -4 -10   6    0.48    0.57 
  -4  10   6   -0.10    0.44 
  -3 -10   6    0.07    0.55 
   3 -10  -6   -0.11    0.46 
  -3 -10   6    0.31    0.49 
  -3  10   6   -0.33    0.42 
  -2 -10   6    3.48    0.53 
   2 -10  -6    3.76    0.49 
  -2  10   6    3.77    0.47 
   1 -10  -6    0.71    0.48 
  -1 -10   6   -0.31    0.49 
  -1  10   6   -0.11    0.38 
   0 -10  -6   -0.71    0.48 
   0 -10   6   -0.17    0.52 
   0  10   6   -0.45    0.36 
   1 -10   6   -0.14    0.50 
  -1 -10  -6   -0.13    0.51 
   1  10   6    0.40    0.37 
  -2 -10  -6    2.01    0.52 
   2 -10   6    0.82    0.37 
   2 -10   6    1.84    0.53 
   2  10   6    1.42    0.36 
   3 -10   6   -0.24    0.38 
  -3 -10  -6   -0.21    0.51 
   3 -10   6   -0.73    0.51 
   3  10   6   -0.20    0.33 
   4 -10   6    1.32    0.42 
  -4 -10  -6    1.01    0.55 
   4 -10   6    1.33    0.55 
   4  10   6    0.77    0.34 
   5 -10   6   -0.12    0.39 
   5 -10   6    0.50    0.55 
  -5 -10  -6   -0.48    0.54 
  -6 -10  -6    0.90    0.56 
   6 -10   6    0.28    0.42 
   6 -10   6    0.56    0.58 
   7 -10   6    2.81    0.64 
   7 -10   6    1.24    0.46 
  -7 -10  -6    1.11    0.60 
  -8 -10  -6    0.27    0.61 
   8 -10   6    1.44    0.49 
   9 -10   6   -0.35    0.49 
  -9 -10  -6   -0.46    0.61 
  10 -10   6    0.33    0.54 
 -10 -10  -6   -0.32    0.64 
  -9 -11   6   -0.46    0.68 
   9 -11  -6    1.19    0.63 
  -9 -11   6   -0.39    0.76 
  -8 -11   6    0.58    0.69 
  -8 -11   6    0.25    0.65 
   8 -11  -6    0.24    0.60 
  -8  11   6   -0.82    0.55 
  -7 -11   6   -0.11    0.66 
  -7 -11   6   -0.70    0.65 
  -7  11   6    0.12    0.54 
  -6 -11   6    0.59    0.66 
  -6 -11   6   -0.21    0.59 
  -6  11   6   -0.95    0.50 
  -5 -11   6    0.53    0.60 
  -5 -11   6    0.29    0.63 
  -5  11   6    0.82    0.50 
  -4 -11   6    0.46    0.63 
  -4 -11   6   -0.45    0.54 
  -4  11   6    0.12    0.50 
  -3 -11   6   -0.39    0.58 
  -3  11   6    0.32    0.47 
   2 -11  -6    1.25    0.53 
  -2 -11   6    0.48    0.55 
  -2  11   6    0.75    0.46 
  -1 -11   6   -0.41    0.57 
   1 -11  -6   -0.05    0.53 
  -1  11   6   -0.10    0.42 
   0 -11  -6   -0.26    0.52 
   0 -11   6    0.17    0.58 
   0  11   6    0.04    0.40 
  -1 -11  -6   -0.41    0.54 
   1 -11   6   -0.21    0.54 
   1  11   6   -0.24    0.38 
  -2 -11  -6   -0.75    0.54 
   2 -11   6   -0.40    0.54 
   2  11   6   -0.16    0.39 
  -3 -11  -6   -0.27    0.57 
   3 -11   6   -0.35    0.56 
  -4 -11  -6   -0.65    0.63 
   4 -11   6    0.02    0.58 
   4 -11   6   -0.10    0.45 
   5 -11   6   -0.26    0.59 
   5 -11   6   -0.56    0.48 
  -5 -11  -6   -1.30    0.60 
   6 -11   6    1.20    0.63 
   6 -11   6   -1.04    0.47 
  -6 -11  -6    0.22    0.63 
  -7 -11  -6   -0.09    0.65 
   7 -11   6   -1.04    0.65 
   7 -11   6   -0.22    0.51 
   8 -11   6   -0.03    0.53 
  -8 -11  -6    0.42    0.68 
  -6 -12   6   -0.57    0.68 
  -6 -12   6   -0.07    0.71 
  -6  12   6   -0.96    0.54 
  -5 -12   6    0.52    0.70 
  -5 -12   6   -0.78    0.61 
  -5  12   6   -0.96    0.52 
  -4 -12   6   -0.36    0.64 
  -4  12   6    0.01    0.53 
  -3 -12   6    0.49    0.60 
  -3  12   6   -0.17    0.54 
  -2 -12   6   -0.18    0.59 
  -2  12   6   -0.05    0.52 
   1 -12  -6    0.34    0.60 
  -1 -12   6   -0.70    0.58 
  -1  12   6    0.13    0.50 
   0 -12   6   -0.34    0.62 
   0 -12  -6   -0.34    0.61 
   0  12   6   -0.53    0.44 
   1 -12   6    0.01    0.59 
  -1 -12  -6   -0.35    0.60 
   2 -12   6   -0.28    0.61 
   3 -12   6    1.63    0.63 
  -3 -12  -6    0.22    0.69 
  -4 -12  -6    0.60    0.71 
   4 -12   6    0.63    0.64 
   5 -12   6   -0.34    0.66 
  -5 -12  -6   -0.03    0.67 
 -17   0   7    0.66    0.59 
 -16   0   7    0.36    0.60 
 -15   0   7    2.64    0.58 
  14   0  -7    0.22    0.37 
 -14   0   7    1.03    0.51 
  13   0  -7   21.91    0.71 
 -13   0   7   20.03    0.90 
 -12   0   7    0.35    0.45 
  12   0  -7   -0.26    0.31 
 -11   0   7    0.57    0.42 
  11   0  -7    0.60    0.29 
  10   0  -7   -0.13    0.26 
 -10   0   7    0.37    0.39 
   9   0  -7    2.49    0.27 
  -9   0   7    3.12    0.40 
  -8   0   7    0.66    0.33 
   8   0  -7    0.14    0.22 
  -7   0   7    0.51    0.30 
   7   0  -7    1.08    0.22 
  -7   0   7    0.60    0.18 
  -6   0   7    0.64    0.28 
  -6   0   7    0.02    0.17 
  -5   0   7   24.38    0.57 
  -5   0   7   23.92    0.71 
  -4   0   7    0.06    0.14 
  -4   0   7   -0.04    0.21 
  -3   0   7    7.97    0.36 
  -3   0   7    8.07    0.29 
  -2   0   7    0.04    0.12 
  -2   0   7   -0.07    0.17 
  -1   0   7   86.36    1.95 
  -1   0   7   86.35    1.68 
   0   0   7    0.09    0.14 
   0   0   7    0.08    0.12 
   1   0   7  111.68    2.18 
   1   0   7  114.77    2.52 
   2   0   7   -0.07    0.13 
   2   0   7    0.16    0.13 
   3   0   7   96.51    2.14 
   3   0   7   94.57    1.86 
   4   0   7    0.08    0.15 
   4   0   7    0.19    0.18 
   5   0   7   20.51    0.52 
   6   0   7    0.12    0.17 
   7   0   7   68.96    1.40 
  -8   0  -7    0.06    0.26 
   8   0   7   -0.01    0.22 
   9   0   7    9.11    0.45 
  -9   0  -7    8.88    0.51 
 -10   0  -7    0.21    0.33 
  10   0   7    0.07    0.27 
 -11   0  -7    0.74    0.34 
 -11   0  -7    0.60    0.32 
  11   0   7    0.38    0.30 
  12   0   7    0.15    0.31 
 -12   0  -7    0.16    0.38 
 -12   0  -7    0.29    0.38 
 -13   0  -7    0.36    0.43 
  13   0   7   -0.15    0.34 
 -13   0  -7    0.12    0.41 
  14   0   7   -0.05    0.37 
 -14   0  -7    0.26    0.42 
 -14   0  -7    0.13    0.41 
  15   0   7    0.16    0.41 
 -15   0  -7   -0.32    0.47 
 -15   0  -7   -0.06    0.50 
  16   0   7    0.32    0.43 
 -16   0  -7   -0.39    0.51 
 -16   0  -7   -0.04    0.54 
 -17  -1   7    1.01    0.60 
 -17   1   7    0.89    0.60 
 -16  -1   7    0.67    0.56 
 -16   1   7    1.01    0.59 
 -15  -1   7    1.21    0.56 
  15  -1  -7    2.02    0.44 
 -15   1   7    0.73    0.56 
  14  -1  -7    0.76    0.40 
 -14  -1   7    0.75    0.53 
 -14   1   7    1.12    0.53 
  13  -1  -7    0.67    0.37 
 -13  -1   7    1.11    0.49 
 -13   1   7    0.36    0.50 
  12  -1  -7    1.30    0.35 
 -12  -1   7    1.75    0.47 
 -12   1   7    2.15    0.47 
  12   1  -7    1.86    0.30 
  11  -1  -7    2.59    0.34 
 -11  -1   7    3.30    0.43 
 -11   1   7    2.85    0.45 
  11   1  -7    2.51    0.30 
  10  -1  -7    8.72    0.47 
 -10  -1   7    9.10    0.65 
 -10   1   7    9.18    0.64 
  10   1  -7    8.41    0.45 
   9  -1  -7   18.51    0.57 
  -9  -1   7   19.75    0.76 
  -9   1   7   19.37    0.74 
   9   1  -7   18.42    0.54 
   8  -1  -7   31.65    0.78 
  -8  -1   7   30.33    0.94 
  -8  -1   7   31.48    0.72 
  -8   1   7   31.35    0.93 
   7  -1  -7   40.14    0.89 
  -7  -1   7   41.04    0.86 
  -7  -1   7   39.83    1.10 
  -7   1   7   39.56    1.07 
   6  -1  -7   57.81    1.19 
  -6  -1   7   56.83    1.16 
  -6  -1   7   55.63    1.43 
  -6   1   7   57.99    1.41 
  -6   1   7   58.54    1.18 
  -5  -1   7  131.95    2.58 
  -5  -1   7  133.42    3.06 
  -5   1   7  135.62    2.60 
  -5   1   7  136.41    3.05 
  -4  -1   7   14.44    0.53 
  -4  -1   7   15.11    0.40 
  -4   1   7   15.93    0.53 
  -4   1   7   15.11    0.45 
  -3  -1   7    0.09    0.11 
  -3  -1   7    0.08    0.20 
  -3   1   7    0.09    0.15 
  -3   1   7    0.00    0.19 
  -2  -1   7    0.12    0.12 
  -2  -1   7    0.04    0.18 
  -2   1   7    0.24    0.14 
  -2   1   7    0.08    0.16 
  -1  -1   7   99.14    2.26 
  -1  -1   7   98.82    1.93 
  -1   1   7  100.73    1.95 
  -1   1   7  102.24    2.24 
   0  -1   7   24.76    0.63 
   0  -1   7   25.21    0.55 
   0   1   7   25.69    0.61 
   0   1   7   25.00    0.57 
   1  -1   7   14.14    0.37 
   1  -1   7   14.03    0.41 
   1   1   7   14.36    0.36 
   1   1   7   13.48    0.38 
   2  -1   7    7.93    0.30 
   2  -1   7    7.46    0.26 
   2   1   7    7.46    0.30 
   2   1   7    7.68    0.24 
   3  -1   7   11.07    0.36 
   3  -1   7   10.19    0.34 
   3   1   7   10.43    0.30 
   3   1   7   10.15    0.35 
   4  -1   7   59.06    1.20 
   4  -1   7   59.99    1.38 
   4   1   7   59.49    1.20 
   5  -1   7    6.57    0.31 
   5  -1   7    6.68    0.34 
  -5  -1  -7    5.99    0.39 
   5   1   7    6.59    0.29 
   6  -1   7    0.17    0.19 
  -6  -1  -7    0.42    0.23 
   6   1   7    0.23    0.17 
  -7  -1  -7   34.42    0.88 
   7  -1   7   33.41    0.79 
   7   1   7   33.71    0.77 
  -8  -1  -7   13.94    0.50 
  -8  -1  -7   14.82    0.56 
   8  -1   7   15.41    0.51 
   8   1   7   15.18    0.49 
   9  -1   7   13.98    0.52 
  -9  -1  -7   13.78    0.57 
  -9  -1  -7   14.66    0.54 
   9   1   7   14.14    0.51 
 -10  -1  -7   21.30    0.74 
  10  -1   7   21.28    0.65 
 -10  -1  -7   21.13    0.74 
  10   1   7   20.98    0.63 
 -11  -1  -7    7.51    0.53 
 -11  -1  -7    8.25    0.54 
  11  -1   7    8.72    0.51 
  11   1   7    8.00    0.47 
 -11   1  -7    8.51    0.54 
 -12  -1  -7    0.05    0.37 
  12  -1   7   -0.19    0.33 
 -12  -1  -7    0.22    0.39 
 -12   1  -7    0.06    0.35 
  12   1   7    0.45    0.32 
 -13  -1  -7    1.65    0.41 
  13  -1   7    0.65    0.37 
 -13  -1  -7    1.79    0.43 
 -13   1  -7    1.22    0.46 
 -13   1  -7    1.79    0.42 
  13   1   7    1.06    0.35 
  14  -1   7    2.18    0.41 
 -14  -1  -7    2.89    0.49 
 -14  -1  -7    2.67    0.49 
 -14   1  -7    2.54    0.45 
  14   1   7    1.74    0.38 
 -14   1  -7    2.85    0.52 
 -15  -1  -7    1.57    0.51 
  15  -1   7    0.75    0.42 
 -15  -1  -7    1.57    0.51 
 -15   1  -7    1.51    0.56 
  15   1   7   -0.16    0.39 
 -15   1  -7    0.96    0.47 
  16  -1   7    1.22    0.46 
 -16  -1  -7    0.77    0.50 
 -16  -1  -7    1.54    0.55 
  16   1   7    0.68    0.45 
 -16   1  -7    0.14    0.55 
 -16  -2   7    2.08    0.59 
  16  -2  -7    1.60    0.47 
 -16   2   7    1.70    0.67 
 -15  -2   7    0.24    0.55 
  15  -2  -7    0.08    0.43 
 -15   2   7    0.51    0.59 
 -14  -2   7    9.23    0.76 
  14  -2  -7    9.61    0.67 
 -14   2   7    9.65    0.81 
 -13  -2   7    1.37    0.52 
  13  -2  -7    0.96    0.40 
 -13   2   7    0.71    0.51 
 -12  -2   7    2.13    0.50 
  12  -2  -7    1.23    0.36 
 -12   2   7    1.08    0.48 
 -11  -2   7    1.22    0.34 
  11  -2  -7    0.80    0.33 
 -11  -2   7    1.59    0.47 
 -11   2   7    1.33    0.44 
 -10  -2   7    0.59    0.20 
  10  -2  -7    0.56    0.30 
 -10  -2   7    0.39    0.31 
 -10  -2   7    0.47    0.43 
 -10   2   7    0.98    0.40 
  -9  -2   7    3.77    0.45 
   9  -2  -7    3.20    0.31 
  -9  -2   7    3.03    0.21 
  -9  -2   7    3.35    0.33 
  -9   2   7    3.07    0.39 
  -8  -2   7   13.69    0.51 
  -8  -2   7   14.32    0.67 
   8  -2  -7   14.05    0.55 
  -8  -2   7   15.06    0.42 
  -8   2   7   13.77    0.62 
   7  -2  -7    0.03    0.24 
  -7  -2   7    0.00    0.30 
  -7  -2   7    0.51    0.15 
  -7   2   7    0.34    0.29 
  -6  -2   7    1.02    0.14 
   6  -2  -7    0.95    0.23 
  -6  -2   7    0.61    0.31 
  -6   2   7    1.08    0.27 
  -6   2   7    1.09    0.21 
   5  -2  -7   32.61    0.75 
  -5  -2   7   34.75    0.70 
  -5  -2   7   34.03    0.91 
  -5   2   7   33.87    0.88 
  -5   2   7   34.13    0.77 
  -4  -2   7    1.09    0.26 
  -4  -2   7    0.96    0.13 
  -4   2   7    1.04    0.23 
  -4   2   7    0.95    0.18 
  -3  -2   7   38.87    0.97 
  -3  -2   7   38.08    0.79 
  -3   2   7   38.97    0.95 
  -3   2   7   38.68    0.84 
  -2  -2   7    0.44    0.11 
  -2  -2   7    0.41    0.20 
  -2   2   7    0.30    0.16 
  -2   2   7    0.57    0.17 
  -1  -2   7  136.21    2.62 
  -1  -2   7  135.55    3.08 
  -1   2   7  138.21    3.05 
  -1   2   7  139.76    2.65 
   0  -2  -7  118.42    2.51 
   0  -2   7  117.46    2.29 
   0  -2   7  119.37    2.68 
   0   2   7  120.01    2.30 
   0   2   7  120.60    2.64 
   1  -2   7    9.78    0.36 
  -1  -2  -7   10.08    0.39 
   1  -2   7   10.37    0.31 
   1   2   7   10.27    0.26 
   1   2   7   10.57    0.32 
   2  -2   7  163.30    3.17 
   2  -2   7  164.47    3.70 
  -2  -2  -7  169.25    3.48 
   2   2   7  165.74    3.17 
   3  -2   7    5.75    0.33 
  -3  -2  -7    6.99    0.39 
   3  -2   7    6.14    0.30 
   3   2   7    6.34    0.31 
   4  -2   7   39.62    1.00 
  -4  -2  -7   41.42    0.96 
   4  -2   7   41.72    0.87 
   4   2   7   40.86    0.87 
   5  -2   7    2.88    0.21 
   5  -2   7    3.20    0.27 
  -5  -2  -7    3.07    0.24 
  -5  -2  -7    3.04    0.23 
   5   2   7    2.67    0.21 
   6  -2   7   38.62    0.84 
   6  -2   7   37.83    0.95 
  -6  -2  -7   36.40    0.90 
  -6  -2  -7   36.30    0.91 
   6   2   7   37.96    0.82 
  -7  -2  -7    0.84    0.21 
  -7  -2  -7    0.87    0.28 
   7  -2   7    0.70    0.20 
   7   2   7    0.80    0.21 
   8  -2   7    7.04    0.44 
  -8  -2  -7    6.65    0.41 
  -8  -2  -7    7.20    0.49 
   8   2   7    7.26    0.39 
  -9  -2  -7    2.82    0.34 
  -9  -2  -7    2.56    0.31 
   9  -2   7    2.38    0.29 
   9   2   7    2.30    0.28 
  10  -2   7    0.45    0.27 
 -10  -2  -7    1.20    0.35 
 -10  -2  -7    1.12    0.31 
  10   2   7    0.83    0.29 
  11  -2   7    0.04    0.32 
 -11  -2  -7    0.30    0.36 
 -11  -2  -7    0.91    0.35 
  11   2   7    0.05    0.29 
 -11   2  -7    0.11    0.35 
 -12  -2  -7    3.65    0.43 
 -12  -2  -7    3.20    0.45 
  12  -2   7    2.49    0.38 
 -12   2  -7    3.30    0.42 
  12   2   7    3.63    0.34 
 -13  -2  -7    0.79    0.43 
  13  -2   7    0.57    0.39 
 -13  -2  -7    1.72    0.44 
 -13   2  -7    1.13    0.41 
  13   2   7    0.33    0.33 
 -14  -2  -7    0.12    0.45 
  14  -2   7    0.29    0.41 
 -14  -2  -7    1.02    0.49 
  14   2   7   -0.12    0.35 
 -14   2  -7    0.19    0.51 
 -14   2  -7    0.01    0.43 
  15  -2   7    0.12    0.44 
 -15  -2  -7    1.26    0.49 
 -15   2  -7    0.53    0.54 
  15   2   7    0.50    0.39 
  16  -2   7    0.98    0.47 
 -16  -2  -7    0.90    0.56 
  16   2   7    0.68    0.42 
 -16   2  -7    0.56    0.59 
 -16  -3   7    2.08    0.62 
  16  -3  -7    2.38    0.51 
 -16   3   7    1.71    0.65 
  15  -3  -7    2.20    0.48 
 -15  -3   7    1.87    0.60 
 -15   3   7    1.42    0.61 
 -14  -3   7    1.73    0.57 
  14  -3  -7    0.15    0.46 
 -14   3   7    0.50    0.56 
  13  -3  -7    1.85    0.42 
 -13  -3   7    3.39    0.58 
 -13   3   7    2.18    0.55 
 -12  -3   7    1.23    0.52 
  12  -3  -7    0.70    0.38 
 -12  -3   7    0.90    0.41 
 -12   3   7   -0.05    0.47 
 -11  -3   7    9.17    0.72 
  11  -3  -7    7.88    0.54 
 -11  -3   7    8.75    0.58 
 -11   3   7    7.05    0.54 
 -10  -3   7    7.95    0.52 
 -10  -3   7    7.74    0.57 
  10  -3  -7    7.78    0.52 
 -10   3   7    8.64    0.63 
  -9  -3   7    6.20    0.52 
   9  -3  -7    5.73    0.38 
  -9  -3   7    4.92    0.38 
  -9   3   7    4.74    0.42 
   8  -3  -7   17.97    0.60 
  -8  -3   7   17.50    0.77 
  -8  -3   7   18.32    0.45 
  -8  -3   7   17.78    0.61 
  -8   3   7   18.37    0.67 
  -7  -3   7    1.93    0.39 
  -7  -3   7    2.23    0.15 
  -7  -3   7    1.86    0.31 
   7  -3  -7    1.89    0.29 
  -7   3   7    2.23    0.30 
  -6  -3   7   17.92    0.66 
  -6  -3   7   19.23    0.43 
   6  -3  -7   18.41    0.58 
  -6  -3   7   17.76    0.60 
  -6   3   7   18.81    0.60 
   5  -3  -7    0.46    0.22 
  -5  -3   7    0.08    0.26 
  -5  -3   7    0.37    0.11 
   5  -3  -7    0.14    0.12 
  -5   3   7    0.41    0.23 
  -5   3   7    0.17    0.19 
  -4  -3   7   19.63    0.45 
  -4  -3   7   19.74    0.62 
   4  -3  -7   19.43    0.49 
  -4   3   7   20.03    0.58 
  -4   3   7   19.52    0.52 
   3  -3  -7   14.10    0.42 
  -3  -3   7   14.38    0.35 
  -3  -3   7   13.70    0.49 
  -3   3   7   13.97    0.44 
  -3   3   7   13.53    0.46 
   2  -3  -7   56.19    1.21 
  -2  -3   7   55.52    1.33 
  -2  -3   7   54.35    1.09 
  -2   3   7   55.97    1.29 
  -2   3   7   55.23    1.15 
  -1  -3   7   19.54    0.45 
  -1  -3   7   19.68    0.57 
   1  -3  -7   19.96    0.54 
  -1   3   7   19.02    0.51 
  -1   3   7   19.88    0.52 
   0  -3  -7    7.90    0.35 
   0  -3   7    7.20    0.35 
   0  -3   7    6.86    0.28 
   0   3   7    7.18    0.30 
   0   3   7    7.12    0.24 
  -1  -3  -7   13.67    0.46 
   1  -3   7   13.47    0.45 
   1  -3   7   13.47    0.37 
   1   3   7   13.29    0.39 
   2  -3   7   51.31    1.24 
  -2  -3  -7   52.07    1.18 
   2  -3   7   50.85    1.05 
   2   3   7   52.32    1.07 
   3  -3   7   37.00    0.79 
  -3  -3  -7   35.91    0.90 
   3  -3   7   36.81    0.92 
   3   3   7   35.84    0.78 
  -4  -3  -7    7.79    0.44 
   4  -3   7    7.45    0.35 
   4  -3   7    7.37    0.38 
   4   3   7    7.53    0.35 
   5  -3   7   22.94    0.57 
   5  -3   7   22.68    0.66 
  -5  -3  -7   22.65    0.68 
  -5  -3  -7   21.72    0.59 
   5   3   7   23.31    0.57 
  -6  -3  -7    1.33    0.28 
   6  -3   7    1.12    0.23 
   6  -3   7    1.44    0.30 
   6   3   7    1.32    0.21 
  -7  -3  -7    4.48    0.35 
   7  -3   7    5.01    0.29 
  -7  -3  -7    3.30    0.31 
   7   3   7    4.51    0.26 
  -8  -3  -7   23.21    0.79 
  -8  -3  -7   27.71    0.80 
   8  -3   7   27.53    0.69 
   8   3   7   27.83    0.67 
  -9  -3  -7   19.97    0.76 
  -9  -3  -7   21.68    0.74 
   9  -3   7   23.30    0.68 
   9   3   7   22.18    0.60 
 -10  -3  -7    6.47    0.44 
  10  -3   7    5.86    0.38 
 -10  -3  -7    7.12    0.58 
  10   3   7    5.83    0.35 
 -11  -3  -7    4.13    0.44 
  11  -3   7    3.90    0.35 
 -11  -3  -7    4.29    0.45 
  11   3   7    3.07    0.32 
 -12  -3  -7   -0.13    0.42 
  12  -3   7    0.25    0.37 
  12   3   7    0.03    0.32 
  13  -3   7    1.76    0.37 
 -13  -3  -7    1.17    0.46 
  13   3   7    1.68    0.35 
 -13   3  -7    2.19    0.43 
 -14  -3  -7    0.29    0.51 
  14  -3   7   -0.57    0.42 
  14   3   7    0.27    0.35 
 -14   3  -7    0.25    0.46 
 -15  -3  -7    0.55    0.52 
  15  -3   7    0.30    0.45 
  15   3   7    0.48    0.40 
 -15   3  -7    0.34    0.56 
 -16  -3  -7    0.35    0.58 
  16  -3   7   -0.03    0.48 
 -16   3  -7    0.45    0.62 
 -16  -4   7    1.88    0.65 
  16  -4  -7    0.18    0.55 
 -16   4   7    0.39    0.67 
 -15  -4   7    2.65    0.65 
  15  -4  -7    1.75    0.50 
 -15   4   7    2.39    0.65 
 -14  -4   7    0.60    0.59 
  14  -4  -7    0.43    0.46 
 -14   4   7    0.28    0.59 
 -13  -4   7    0.48    0.46 
 -13  -4   7    0.86    0.58 
  13  -4  -7   -0.66    0.43 
 -13   4   7    0.15    0.53 
  12  -4  -7    1.83    0.41 
 -12  -4   7    1.44    0.44 
 -12  -4   7    2.40    0.56 
 -12   4   7    1.19    0.49 
  11  -4  -7    0.29    0.37 
 -11  -4   7   -0.34    0.51 
 -11  -4   7    0.43    0.41 
 -11   4   7    0.78    0.45 
  10  -4  -7    0.59    0.36 
 -10  -4   7    0.35    0.39 
 -10  -4   7    0.01    0.48 
 -10   4   7    1.06    0.44 
  -9  -4   7   20.47    0.72 
   9  -4  -7   19.32    0.68 
  -9  -4   7   19.33    0.82 
  -9   4   7   21.15    0.76 
  -8  -4   7    0.60    0.44 
   8  -4  -7    0.37    0.28 
  -8  -4   7    0.18    0.35 
  -8   4   7    0.93    0.34 
  -7  -4   7    6.44    0.49 
  -7  -4   7    6.33    0.47 
   7  -4  -7    7.26    0.49 
  -7   4   7    7.59    0.46 
   6  -4  -7   12.16    0.53 
  -6  -4   7   12.29    0.53 
  -6  -4   7   11.91    0.59 
  -6   4   7   12.78    0.53 
  -5  -4   7    0.14    0.29 
   5  -4  -7    0.06    0.14 
  -5  -4   7    0.05    0.29 
   5  -4  -7    0.01    0.27 
  -5   4   7    0.22    0.24 
  -5   4   7   -0.25    0.23 
  -4  -4   7    5.58    0.21 
  -4  -4   7    6.24    0.42 
   4  -4  -7    6.40    0.31 
  -4   4   7    6.11    0.36 
  -4   4   7    7.05    0.36 
   3  -4  -7   60.01    1.32 
  -3  -4   7   60.47    1.47 
  -3  -4   7   60.25    1.17 
  -3   4   7   60.51    1.40 
  -3   4   7   60.93    1.27 
  -2  -4   7   29.36    0.79 
  -2  -4   7   27.70    0.60 
   2  -4  -7   28.48    0.71 
  -2   4   7   28.35    0.70 
  -2   4   7   28.36    0.67 
  -1  -4   7    0.88    0.26 
   1  -4  -7    0.97    0.21 
  -1  -4   7    0.73    0.13 
  -1   4   7    0.66    0.19 
  -1   4   7    0.95    0.15 
   0  -4  -7   10.19    0.45 
   0  -4   7    9.22    0.42 
   0  -4   7    9.58    0.31 
   0   4   7    9.29    0.35 
   0   4   7    8.84    0.29 
   1  -4   7   98.16    1.96 
   1  -4   7  100.74    2.31 
  -1  -4  -7  103.35    2.17 
   1   4   7   99.85    1.97 
  -2  -4  -7    0.47    0.24 
   2  -4   7    0.32    0.16 
   2  -4   7    0.03    0.25 
   2   4   7    0.24    0.19 
   3  -4   7   39.40    0.86 
  -3  -4  -7   41.07    0.99 
   3  -4   7   38.29    1.01 
   3   4   7   40.48    0.87 
  -4  -4  -7    2.17    0.29 
   4  -4   7    1.76    0.30 
   4  -4   7    2.05    0.21 
   4   4   7    2.37    0.21 
   5  -4   7    1.58    0.21 
   5  -4   7    1.80    0.31 
  -5  -4  -7    1.61    0.30 
   5   4   7    1.77    0.21 
  -6  -4  -7    3.88    0.23 
  -6  -4  -7    3.77    0.35 
   6  -4   7    4.34    0.37 
   6  -4   7    3.69    0.28 
   6   4   7    4.04    0.25 
   7  -4   7    4.18    0.40 
   7  -4   7    3.81    0.30 
  -7  -4  -7    3.74    0.37 
  -7  -4  -7    3.53    0.28 
   7   4   7    3.32    0.27 
   8  -4   7    0.56    0.28 
  -8  -4  -7   -0.06    0.34 
  -8  -4  -7   -0.99    0.29 
   8   4   7   -0.03    0.24 
  -9  -4  -7    0.55    0.37 
   9  -4   7    0.08    0.30 
   9   4   7    0.58    0.25 
  10  -4   7    1.13    0.31 
 -10  -4  -7    1.42    0.40 
  10   4   7    1.09    0.29 
 -11  -4  -7   10.06    0.65 
  11  -4   7   10.22    0.61 
  11   4   7   10.28    0.52 
 -12  -4  -7    6.33    0.52 
  12  -4   7    7.02    0.47 
  12   4   7    5.84    0.39 
  13  -4   7    0.42    0.41 
 -13  -4  -7    0.67    0.48 
  13   4   7    0.83    0.35 
  14  -4   7    0.80    0.45 
 -14  -4  -7    0.75    0.55 
  14   4   7    1.25    0.38 
  15  -4   7    0.72    0.48 
 -15  -4  -7    0.28    0.58 
  16  -4   7    0.48    0.51 
 -16  -4  -7    1.09    0.62 
  15  -5  -7    0.34    0.52 
 -15  -5   7    0.59    0.71 
 -15   5   7    0.28    0.65 
  14  -5  -7    0.15    0.48 
 -14  -5   7    0.74    0.66 
 -14   5   7   -0.28    0.60 
 -13  -5   7    2.38    0.54 
 -13  -5   7    3.29    0.67 
  13  -5  -7    2.08    0.48 
 -13   5   7    2.38    0.59 
  12  -5  -7    3.22    0.48 
 -12  -5   7    2.55    0.51 
 -12  -5   7    3.94    0.66 
 -12   5   7    3.77    0.55 
 -11  -5   7    1.55    0.47 
 -11  -5   7    1.60    0.60 
  11  -5  -7    1.86    0.43 
 -11   5   7    1.87    0.48 
  10  -5  -7    7.22    0.52 
 -10  -5   7    8.52    0.64 
 -10  -5   7    8.67    0.68 
 -10   5   7    9.52    0.66 
  -9  -5   7    0.36    0.40 
  -9  -5   7    0.41    0.50 
   9  -5  -7    0.67    0.37 
  -9   5   7    0.97    0.39 
  -8  -5   7    0.55    0.38 
  -8  -5   7   -0.07    0.46 
   8  -5  -7   -0.21    0.31 
  -8   5   7    0.58    0.35 
  -7  -5   7    3.63    0.40 
  -7  -5   7    3.96    0.48 
   7  -5  -7    3.41    0.37 
  -7   5   7    4.08    0.38 
  -6  -5   7   -0.43    0.34 
   6  -5  -7    0.06    0.28 
  -6  -5   7   -0.19    0.38 
  -6   5   7   -0.27    0.27 
   5  -5  -7    0.09    0.18 
  -5  -5   7    0.27    0.35 
   5  -5  -7    0.06    0.30 
  -5  -5   7    0.11    0.33 
  -5   5   7    0.90    0.26 
  -5   5   7    0.81    0.27 
  -4  -5   7    9.44    0.51 
   4  -5  -7    9.70    0.37 
  -4   5   7    9.96    0.44 
  -4   5   7    9.80    0.42 
   3  -5  -7    4.03    0.26 
  -3  -5   7    3.30    0.21 
  -3  -5   7    4.28    0.37 
  -3   5   7    4.02    0.29 
  -3   5   7    4.00    0.33 
   2  -5  -7    8.65    0.45 
  -2  -5   7    8.22    0.29 
  -2  -5   7    9.15    0.46 
  -2   5   7    8.87    0.34 
  -2   5   7    8.44    0.45 
   1  -5  -7    0.45    0.24 
  -1  -5   7    0.39    0.29 
  -1  -5   7    0.33    0.15 
  -1   5   7    0.02    0.22 
  -1   5   7    0.35    0.16 
   0  -5   7    0.39    0.15 
   0  -5  -7    0.62    0.24 
   0  -5   7    0.64    0.26 
   0   5   7    0.56    0.22 
   0   5   7    0.37    0.13 
  -1  -5  -7    0.27    0.25 
   1  -5   7    0.27    0.29 
   1  -5   7    0.17    0.17 
   1   5   7    0.11    0.21 
  -2  -5  -7    6.99    0.48 
   2  -5   7    5.93    0.42 
   2  -5   7    6.77    0.34 
   2   5   7    6.70    0.38 
  -3  -5  -7    4.31    0.34 
   3  -5   7    4.17    0.25 
   3  -5   7    4.18    0.36 
   3   5   7    3.81    0.25 
   4  -5   7   60.57    1.53 
   4  -5   7   65.05    1.32 
  -4  -5  -7   63.28    1.48 
   4   5   7   62.85    1.30 
   5  -5   7    1.68    0.25 
  -5  -5  -7    1.76    0.34 
   5  -5   7    1.05    0.31 
   5   5   7    1.25    0.22 
   6  -5   7    4.31    0.30 
  -6  -5  -7    5.08    0.40 
   6  -5   7    4.72    0.41 
   6   5   7    4.47    0.29 
   7  -5   7   -0.03    0.37 
   7  -5   7    0.19    0.28 
  -7  -5  -7    0.27    0.36 
   7   5   7    0.20    0.25 
  -8  -5  -7    2.73    0.41 
   8  -5   7    2.76    0.34 
   8   5   7    2.54    0.27 
  -9  -5  -7    5.06    0.46 
   9  -5   7    4.58    0.38 
   9   5   7    4.90    0.32 
  10  -5   7    5.37    0.42 
 -10  -5  -7    5.61    0.50 
  10   5   7    4.98    0.34 
 -11  -5  -7    0.89    0.45 
  11  -5   7    0.50    0.39 
  11   5   7    0.63    0.31 
 -12  -5  -7    0.25    0.49 
  12  -5   7    0.63    0.37 
  12   5   7    0.37    0.32 
 -13  -5  -7   -0.17    0.51 
  13  -5   7   -0.04    0.43 
 -14  -5  -7    1.16    0.54 
  14  -5   7    1.51    0.47 
 -15  -5  -7   -0.36    0.56 
  15  -5   7    0.48    0.50 
  15  -6  -7   -0.43    0.55 
 -15  -6   7    0.77    0.75 
 -15   6   7   -0.34    0.68 
 -14  -6   7    0.58    0.72 
  14  -6  -7   -0.18    0.50 
 -14  -6   7   -0.22    0.59 
 -14   6   7    0.15    0.66 
 -13  -6   7    1.04    0.56 
 -13  -6   7    0.18    0.73 
  13  -6  -7    0.04    0.48 
 -13   6   7    0.00    0.59 
 -12  -6   7    0.38    0.53 
  12  -6  -7    0.38    0.47 
 -12  -6   7   -1.02    0.68 
 -12   6   7   -0.69    0.52 
  11  -6  -7   -0.31    0.45 
 -11  -6   7   -0.27    0.48 
 -11  -6   7   -1.19    0.61 
 -11   6   7   -0.59    0.51 
  10  -6  -7    9.85    0.59 
 -10  -6   7    9.50    0.67 
 -10  -6   7   10.61    0.82 
 -10   6   7   12.35    0.71 
  -9  -6   7    0.72    0.56 
  -9  -6   7    0.64    0.45 
   9  -6  -7    1.01    0.37 
  -9   6   7    0.49    0.42 
   8  -6  -7    7.43    0.47 
  -8  -6   7    7.98    0.62 
  -8  -6   7    7.81    0.62 
  -8   6   7    8.49    0.60 
  -7  -6   7    2.04    0.42 
  -7  -6   7    1.99    0.49 
   7  -6  -7    2.30    0.38 
  -7   6   7    1.91    0.38 
   6  -6  -7    3.53    0.39 
  -6  -6   7    3.75    0.43 
  -6  -6   7    4.15    0.48 
  -6   6   7    4.55    0.38 
   5  -6  -7    0.21    0.23 
  -5  -6   7    0.72    0.39 
  -5  -6   7    0.42    0.38 
   5  -6  -7    0.37    0.34 
  -5   6   7    0.25    0.30 
  -5   6   7    0.39    0.30 
  -4  -6   7   19.00    0.70 
   4  -6  -7   18.37    0.55 
  -4  -6   7   18.62    0.71 
  -4   6   7   18.60    0.65 
  -4   6   7   18.82    0.60 
  -3  -6   7    3.12    0.39 
  -3  -6   7    2.29    0.15 
   3  -6  -7    2.54    0.28 
  -3   6   7    2.62    0.30 
   2  -6  -7   14.57    0.55 
  -2  -6   7   14.26    0.58 
  -2  -6   7   13.39    0.39 
  -2   6   7   13.52    0.55 
  -1  -6   7   -0.48    0.32 
   1  -6  -7   -0.12    0.27 
  -1  -6   7    0.12    0.16 
  -1   6   7   -0.28    0.22 
   0  -6  -7    2.21    0.32 
   0  -6   7    2.46    0.21 
   0  -6   7    2.81    0.36 
   0   6   7    2.38    0.27 
  -1  -6  -7    0.21    0.30 
   1  -6   7    0.74    0.20 
   1  -6   7    0.64    0.34 
   1   6   7    0.28    0.24 
  -2  -6  -7   16.57    0.66 
   2  -6   7   16.07    0.52 
   2  -6   7   16.29    0.61 
   2   6   7   16.60    0.53 
   3  -6   7    0.26    0.23 
  -3  -6  -7   -0.11    0.32 
   3  -6   7    0.63    0.35 
   3   6   7    0.19    0.23 
   4  -6   7    0.45    0.24 
  -4  -6  -7    0.88    0.35 
   4  -6   7    0.42    0.36 
   4   6   7    0.29    0.23 
   5  -6   7   22.33    0.66 
  -5  -6  -7   22.22    0.80 
   5  -6   7   21.41    0.74 
   5   6   7   21.02    0.63 
   6  -6   7    4.48    0.34 
  -6  -6  -7    3.79    0.43 
   6  -6   7    5.06    0.45 
   6   6   7    4.54    0.30 
   7  -6   7    2.35    0.33 
   7  -6   7    2.88    0.44 
  -7  -6  -7    1.69    0.42 
   7   6   7    2.01    0.28 
   8  -6   7    1.12    0.35 
  -8  -6  -7    1.43    0.43 
   8   6   7    0.82    0.27 
   9  -6   7    0.50    0.36 
  -9  -6  -7    0.52    0.44 
   9   6   7    0.61    0.28 
  10  -6   7    0.34    0.35 
 -10  -6  -7   -0.09    0.46 
  10   6   7    0.22    0.29 
  11  -6   7    0.77    0.42 
 -11  -6  -7    1.43    0.50 
  11   6   7    0.77    0.31 
  12  -6   7    5.05    0.50 
 -12  -6  -7    4.83    0.57 
 -13  -6  -7    2.13    0.57 
  13  -6   7    2.23    0.49 
 -14  -6  -7    0.50    0.58 
  14  -6   7   -0.12    0.49 
 -14  -7   7    0.85    0.65 
  14  -7  -7    0.41    0.57 
 -14  -7   7    0.41    0.79 
 -14   7   7   -0.26    0.66 
 -13  -7   7   -0.66    0.73 
  13  -7  -7    0.20    0.54 
 -13  -7   7    0.14    0.57 
 -13   7   7   -0.26    0.61 
 -12  -7   7   -0.76    0.54 
  12  -7  -7   -0.14    0.49 
 -12  -7   7    0.39    0.72 
 -12   7   7   -0.36    0.60 
 -11  -7   7    6.03    0.60 
 -11  -7   7    4.09    0.73 
  11  -7  -7    5.09    0.53 
 -11   7   7    6.19    0.62 
 -10  -7   7    3.95    0.55 
  10  -7  -7    2.49    0.49 
 -10  -7   7    2.39    0.67 
 -10   7   7    3.66    0.56 
   9  -7  -7    0.55    0.44 
  -9  -7   7    1.77    0.61 
  -9  -7   7    1.98    0.51 
  -9   7   7    1.34    0.46 
  -8  -7   7    2.26    0.56 
  -8  -7   7    2.24    0.49 
   8  -7  -7    2.43    0.44 
  -8   7   7    1.73    0.45 
  -7  -7   7    4.55    0.51 
  -7  -7   7    4.24    0.56 
   7  -7  -7    3.68    0.45 
  -7   7   7    4.66    0.44 
  -6  -7   7    0.28    0.44 
   6  -7  -7   -0.04    0.39 
  -6  -7   7   -0.03    0.45 
  -6   7   7    0.05    0.35 
  -6   7   7    0.45    0.35 
  -5  -7   7    0.65    0.43 
  -5  -7   7    0.91    0.44 
  -5   7   7    0.29    0.34 
  -4  -7   7    0.09    0.40 
  -4  -7   7   -0.01    0.42 
   4  -7  -7   -0.29    0.27 
  -4   7   7   -0.01    0.29 
   3  -7  -7   -0.28    0.30 
  -3  -7   7   -0.58    0.38 
  -3   7   7   -0.22    0.30 
  -2  -7   7    0.43    0.38 
   2  -7  -7    0.79    0.31 
  -2  -7   7    0.71    0.18 
  -2   7   7    0.18    0.30 
   1  -7  -7   15.64    0.67 
  -1  -7   7   14.44    0.46 
  -1  -7   7   14.34    0.63 
  -1   7   7   14.43    0.58 
   0  -7   7   -0.12    0.21 
   0  -7  -7    0.36    0.32 
   0  -7   7    0.25    0.38 
   0   7   7   -0.14    0.27 
   1  -7   7    5.04    0.45 
   1  -7   7    5.76    0.30 
  -1  -7  -7    4.53    0.42 
   1   7   7    5.12    0.33 
   2  -7   7    0.16    0.39 
   2  -7   7   -0.02    0.24 
  -2  -7  -7    0.41    0.36 
   2   7   7    0.04    0.26 
   3  -7   7   18.32    0.58 
  -3  -7  -7   18.74    0.77 
   3  -7   7   17.26    0.71 
   3   7   7   17.97    0.58 
   4  -7   7    5.59    0.34 
  -4  -7  -7    4.84    0.45 
   4  -7   7    5.31    0.43 
   4   7   7    4.83    0.32 
  -5  -7  -7   24.86    0.91 
   5  -7   7   24.34    0.84 
   5  -7   7   25.00    0.74 
   5   7   7   25.24    0.70 
   6  -7   7    2.38    0.46 
  -6  -7  -7    2.75    0.46 
   6  -7   7    2.49    0.33 
   6   7   7    1.82    0.29 
  -7  -7  -7    0.79    0.46 
   7  -7   7    1.74    0.47 
   7  -7   7    1.15    0.34 
   7   7   7    1.46    0.28 
   8  -7   7    2.45    0.39 
  -8  -7  -7    1.79    0.49 
   8  -7   7    2.56    0.51 
   8   7   7    1.94    0.31 
  -9  -7  -7    0.87    0.50 
   9  -7   7    0.33    0.39 
   9   7   7   -0.20    0.29 
  10  -7   7    0.16    0.42 
 -10  -7  -7    0.12    0.50 
  11  -7   7   -0.21    0.45 
 -11  -7  -7    0.62    0.54 
  12  -7   7    0.99    0.48 
 -12  -7  -7    0.44    0.56 
  13  -7   7    0.09    0.49 
 -13  -7  -7    0.97    0.59 
  14  -7   7    0.39    0.52 
 -14  -7  -7    0.85    0.61 
  13  -8  -7    0.00    0.57 
 -13  -8   7    1.02    0.63 
 -13  -8   7   -0.20    0.80 
 -13   8   7   -0.84    0.64 
 -12  -8   7   -0.92    0.75 
 -12  -8   7   -0.59    0.64 
  12  -8  -7   -0.21    0.53 
 -12   8   7   -0.41    0.65 
 -11  -8   7   -0.19    0.57 
  11  -8  -7   -0.12    0.51 
 -11  -8   7    0.18    0.72 
 -11   8   7   -0.08    0.57 
 -10  -8   7    1.75    0.60 
 -10  -8   7    0.47    0.72 
  10  -8  -7    1.93    0.52 
 -10   8   7    0.95    0.54 
  -9  -8   7   -0.42    0.65 
   9  -8  -7    1.16    0.49 
  -9  -8   7    0.54    0.57 
  -9   8   7    0.39    0.52 
   8  -8  -7    0.44    0.46 
  -8  -8   7    0.85    0.58 
  -8  -8   7    1.09    0.53 
  -8   8   7    0.31    0.47 
  -7  -8   7   -0.12    0.50 
  -7  -8   7   -0.05    0.52 
   7  -8  -7    0.20    0.44 
  -7   8   7    0.15    0.42 
  -7   8   7   -0.01    0.43 
  -6  -8   7    0.59    0.50 
  -6  -8   7    0.40    0.50 
   6  -8  -7    0.73    0.40 
  -6   8   7    0.35    0.40 
  -5  -8   7    3.32    0.52 
  -5  -8   7    3.30    0.51 
  -5   8   7    3.43    0.41 
  -4  -8   7   -0.73    0.43 
   4  -8  -7   -0.17    0.32 
  -4  -8   7   -0.21    0.46 
  -4   8   7   -0.01    0.36 
  -3  -8   7    7.81    0.58 
   3  -8  -7    7.76    0.48 
  -3   8   7    7.76    0.45 
  -2  -8   7    0.54    0.42 
   2  -8  -7    0.05    0.38 
  -2   8   7    0.10    0.34 
  -1  -8   7    0.44    0.42 
   1  -8  -7    0.53    0.37 
  -1   8   7    0.90    0.33 
   0  -8  -7    0.04    0.37 
   0  -8   7    0.29    0.42 
   0  -8   7    0.11    0.24 
   0   8   7    0.56    0.31 
   1  -8   7    0.23    0.25 
   1  -8   7    0.40    0.43 
  -1  -8  -7   -0.05    0.38 
   1   8   7    0.06    0.31 
  -2  -8  -7   -0.36    0.44 
   2  -8   7   -0.66    0.43 
   2  -8   7    0.27    0.28 
   2   8   7   -0.06    0.29 
  -3  -8  -7    2.92    0.48 
   3  -8   7    2.52    0.33 
   3  -8   7    2.30    0.47 
   3   8   7    3.03    0.33 
  -4  -8  -7    1.23    0.46 
   4  -8   7    0.98    0.31 
   4  -8   7    2.14    0.47 
   4   8   7    1.06    0.30 
   5  -8   7    1.03    0.33 
   5  -8   7    1.09    0.47 
  -5  -8  -7    2.22    0.49 
   5   8   7    1.34    0.30 
  -6  -8  -7    8.96    0.60 
   6  -8   7    7.76    0.67 
   6  -8   7    8.16    0.46 
   6   8   7    9.93    0.51 
   7  -8   7    0.36    0.37 
  -7  -8  -7    0.42    0.50 
   7  -8   7    0.38    0.51 
   7   8   7   -0.01    0.29 
  -8  -8  -7    3.12    0.55 
   8  -8   7    4.74    0.59 
   8  -8   7    3.91    0.45 
   8   8   7    3.83    0.35 
  -9  -8  -7    1.65    0.55 
   9  -8   7    1.16    0.44 
  10  -8   7    0.04    0.45 
 -10  -8  -7    0.47    0.57 
  11  -8   7    0.65    0.49 
 -11  -8  -7    1.50    0.59 
  12  -8   7    0.15    0.50 
 -12  -8  -7    0.81    0.60 
  13  -8   7    0.46    0.54 
 -13  -8  -7    1.49    0.68 
 -12  -9   7    1.14    0.66 
  12  -9  -7    1.53    0.60 
 -12  -9   7    0.74    0.88 
 -12   9   7    0.81    0.64 
  11  -9  -7    0.55    0.57 
 -11  -9   7    0.09    0.64 
 -11  -9   7    0.85    0.81 
 -11   9   7    0.26    0.66 
 -10  -9   7    0.42    0.71 
 -10  -9   7    0.74    0.61 
  10  -9  -7    1.24    0.51 
 -10   9   7    1.31    0.62 
  -9  -9   7    0.01    0.58 
  -9  -9   7   -0.23    0.65 
   9  -9  -7    0.54    0.48 
  -9   9   7    0.10    0.57 
  -8  -9   7   -1.24    0.60 
   8  -9  -7   -0.60    0.50 
  -8  -9   7    0.34    0.58 
  -8   9   7   -0.02    0.48 
  -8   9   7    0.28    0.52 
  -7  -9   7    0.43    0.56 
  -7  -9   7    0.24    0.56 
   7  -9  -7    1.05    0.50 
  -7   9   7    0.32    0.46 
  -6  -9   7    2.16    0.56 
  -6  -9   7    1.78    0.56 
  -6   9   7    1.41    0.46 
  -5  -9   7    1.16    0.52 
  -5  -9   7    2.14    0.54 
  -5   9   7    1.95    0.44 
  -4  -9   7   -0.75    0.47 
  -4   9   7   -0.29    0.40 
  -3  -9   7   -0.05    0.47 
   3  -9  -7   -0.21    0.41 
  -3   9   7   -0.86    0.38 
   2  -9  -7    5.54    0.47 
  -2  -9   7    6.04    0.55 
  -2   9   7    6.61    0.47 
  -1  -9   7   -0.26    0.46 
   1  -9  -7   -0.30    0.43 
  -1   9   7   -0.35    0.38 
   0  -9  -7    4.24    0.50 
   0  -9   7    4.66    0.53 
   0   9   7    4.91    0.40 
   1  -9   7    0.22    0.30 
  -1  -9  -7    0.60    0.43 
   1  -9   7    0.12    0.47 
   1   9   7    0.37    0.34 
  -2  -9  -7    0.11    0.46 
   2  -9   7    0.65    0.32 
   2  -9   7    0.90    0.49 
   2   9   7    0.91    0.33 
  -3  -9  -7   -0.06    0.47 
   3  -9   7    0.06    0.34 
   3  -9   7   -0.21    0.49 
   3   9   7    0.59    0.31 
   4  -9   7    1.05    0.51 
   4  -9   7    1.21    0.36 
  -4  -9  -7    1.08    0.50 
   4   9   7    0.89    0.32 
   5  -9   7   -0.09    0.36 
  -5  -9  -7   -0.47    0.49 
   5  -9   7    0.18    0.50 
   5   9   7   -0.01    0.32 
   6  -9   7    3.05    0.56 
  -6  -9  -7    3.57    0.58 
   6  -9   7    3.77    0.44 
   6   9   7    3.49    0.34 
   7  -9   7    0.23    0.56 
  -7  -9  -7    0.37    0.56 
   7  -9   7    0.05    0.44 
   8  -9   7   -0.21    0.42 
  -8  -9  -7   -0.12    0.51 
   8  -9   7    1.41    0.58 
  -9  -9  -7   -0.51    0.59 
   9  -9   7    0.09    0.47 
 -10  -9  -7    0.32    0.62 
  10  -9   7    0.79    0.50 
  11  -9   7   -0.74    0.52 
 -11  -9  -7   -0.99    0.63 
 -10 -10   7   -0.70    0.74 
  10 -10  -7    0.66    0.59 
 -10 -10   7    0.20    0.66 
 -10  10   7    0.11    0.51 
 -10  10   7   -0.64    0.62 
  -9 -10   7    0.58    0.65 
   9 -10  -7    0.05    0.57 
  -9 -10   7    0.56    0.74 
  -9  10   7    0.01    0.49 
  -9  10   7   -0.62    0.61 
  -8 -10   7    0.49    0.63 
   8 -10  -7    0.03    0.55 
  -8 -10   7    0.22    0.65 
  -8  10   7   -1.99    0.55 
  -8  10   7    0.23    0.53 
  -7 -10   7    0.97    0.63 
  -7 -10   7    1.45    0.62 
  -7  10   7    1.61    0.53 
  -6 -10   7    0.72    0.61 
  -6 -10   7   -0.59    0.56 
  -6  10   7    0.12    0.48 
  -5 -10   7    1.27    0.59 
  -5 -10   7    0.21    0.55 
  -5  10   7    0.41    0.47 
  -4 -10   7    2.10    0.56 
  -4  10   7    1.35    0.47 
  -3 -10   7    1.69    0.57 
  -3  10   7    1.52    0.45 
   2 -10  -7    0.31    0.47 
  -2 -10   7    1.08    0.52 
  -2  10   7    0.10    0.42 
  -1 -10   7    0.63    0.55 
   1 -10  -7    0.63    0.48 
  -1  10   7    0.06    0.40 
   0 -10  -7    0.04    0.50 
   0 -10   7    0.09    0.52 
   0  10   7    0.52    0.39 
   1 -10   7    1.96    0.55 
  -1 -10  -7    1.41    0.54 
   1  10   7    2.01    0.41 
  -2 -10  -7   -0.24    0.54 
   2 -10   7    0.24    0.54 
   2  10   7    0.34    0.35 
   3 -10   7    0.03    0.54 
  -3 -10  -7    0.11    0.52 
   3 -10   7    1.20    0.39 
   3  10   7    0.05    0.36 
  -4 -10  -7   -0.21    0.54 
   4 -10   7   -0.64    0.39 
   4 -10   7   -0.18    0.55 
   4  10   7    0.38    0.34 
   5 -10   7    0.15    0.57 
   5 -10   7   -0.34    0.40 
  -5 -10  -7    0.59    0.57 
   6 -10   7    0.16    0.46 
   6 -10   7    0.55    0.58 
  -6 -10  -7    0.35    0.59 
   7 -10   7    4.53    0.51 
  -7 -10  -7    3.98    0.66 
   7 -10   7    4.94    0.67 
  -8 -10  -7   -0.45    0.63 
   8 -10   7   -0.40    0.48 
  -9 -10  -7   -0.37    0.65 
   9 -10   7    0.00    0.51 
 -10 -10  -7    0.23    0.67 
  10 -10   7   -0.10    0.54 
  -8 -11   7   -0.61    0.73 
  -8 -11   7   -1.40    0.72 
  -8  11   7   -0.60    0.56 
  -7 -11   7    0.18    0.65 
  -7 -11   7    1.18    0.69 
  -7  11   7   -0.10    0.55 
  -6 -11   7   -0.62    0.61 
  -6 -11   7    0.19    0.66 
  -6  11   7   -0.10    0.51 
  -5 -11   7    0.15    0.63 
  -5  11   7    0.12    0.51 
  -4 -11   7    0.23    0.59 
  -4  11   7   -0.58    0.52 
  -3 -11   7    0.26    0.57 
  -3  11   7   -0.54    0.48 
   2 -11  -7    0.00    0.51 
  -2 -11   7    0.24    0.60 
  -2  11   7   -0.72    0.45 
   1 -11  -7    0.68    0.51 
  -1 -11   7    0.46    0.57 
  -1  11   7    0.73    0.45 
   0 -11   7    0.47    0.57 
   0 -11  -7   -0.55    0.57 
   0  11   7   -0.63    0.44 
  -1 -11  -7   -0.36    0.58 
   1 -11   7   -0.51    0.60 
   1  11   7    0.43    0.40 
   2 -11   7   -0.05    0.58 
  -2 -11  -7    0.59    0.61 
   2  11   7   -0.15    0.38 
  -3 -11  -7   -0.30    0.59 
   3 -11   7   -0.09    0.59 
   4 -11   7   -0.91    0.59 
   4 -11   7   -0.02    0.45 
  -4 -11  -7   -0.55    0.64 
  -5 -11  -7   -0.17    0.63 
   5 -11   7   -0.34    0.48 
   5 -11   7   -0.25    0.62 
  -6 -11  -7    0.06    0.66 
   6 -11   7    0.36    0.66 
   6 -11   7    0.19    0.51 
   7 -11   7    1.38    0.68 
   7 -11   7   -0.35    0.51 
  -7 -11  -7   -0.25    0.67 
   8 -11   7   -0.72    0.53 
  -8 -11  -7   -0.49    0.70 
  -5 -12   7   -0.08    0.69 
  -5  12   7   -0.27    0.55 
  -4 -12   7    0.58    0.64 
  -4  12   7   -0.40    0.53 
  -3 -12   7   -0.09    0.66 
  -3  12   7   -0.19    0.52 
  -2 -12   7    0.05    0.65 
  -2  12   7    0.05    0.51 
  -1 -12   7    0.37    0.65 
   1 -12  -7   -0.24    0.60 
  -1  12   7   -0.33    0.50 
   0 -12   7    0.04    0.65 
   0 -12  -7   -0.59    0.62 
   0  12   7   -0.73    0.45 
  -1 -12  -7    0.43    0.63 
   1 -12   7   -0.27    0.62 
   1  12   7   -0.07    0.44 
   2 -12   7    0.14    0.63 
  -2 -12  -7   -0.12    0.64 
   3 -12   7   -0.66    0.63 
  -3 -12  -7   -0.31    0.69 
   4 -12   7    0.58    0.66 
  -4 -12  -7   -0.35    0.66 
  -5 -12  -7   -0.50    0.69 
   5 -12   7    1.27    0.73 
 -16   0   8    2.78    0.61 
 -15   0   8    0.60    0.56 
 -14   0   8   -0.01    0.52 
 -13   0   8    0.71    0.50 
  13   0  -8   -0.42    0.35 
  12   0  -8   27.60    0.82 
  11   0  -8   -0.26    0.30 
 -11   0   8    0.19    0.39 
 -10   0   8   33.32    1.05 
  10   0  -8   33.71    0.83 
   9   0  -8   -0.10    0.26 
  -9   0   8    0.06    0.23 
  -9   0   8    0.67    0.38 
  -8   0   8   21.91    0.78 
  -8   0   8   21.14    0.59 
  -7   0   8    0.19    0.31 
  -7   0   8   -0.36    0.19 
  -6   0   8   -0.03    0.18 
  -6   0   8   -0.01    0.28 
  -5   0   8   -0.31    0.26 
  -5   0   8    0.25    0.17 
  -4   0   8    7.36    0.46 
  -4   0   8    7.47    0.31 
  -3   0   8    0.30    0.15 
  -3   0   8    0.02    0.21 
  -2   0   8    8.92    0.33 
  -2   0   8    9.63    0.36 
  -1   0   8   -0.05    0.17 
  -1   0   8   -0.28    0.13 
   0   0   8  127.24    2.44 
   0   0   8  125.65    2.82 
   1   0   8    0.14    0.14 
   1   0   8    0.20    0.14 
   2   0   8   15.90    0.43 
   2   0   8   15.25    0.43 
   3   0   8   -0.17    0.16 
   3   0   8   -0.08    0.16 
   4   0   8  109.42    2.12 
   4   0   8  107.92    2.43 
   5   0   8    0.13    0.18 
   6   0   8   56.13    1.17 
   7   0   8    0.43    0.21 
   8   0   8    6.14    0.41 
  -8   0  -8    5.77    0.36 
   9   0   8   -0.07    0.25 
  -9   0  -8   -0.28    0.31 
  10   0   8   22.21    0.66 
 -11   0  -8   -0.32    0.33 
 -11   0  -8   -0.17    0.35 
  11   0   8    0.38    0.28 
  12   0   8    0.92    0.34 
 -12   0  -8    1.61    0.40 
 -12   0  -8    1.03    0.39 
 -13   0  -8   -0.28    0.42 
 -13   0  -8    0.06    0.40 
  13   0   8    0.11    0.35 
 -14   0  -8    2.16    0.48 
  14   0   8    1.96    0.41 
 -14   0  -8    2.50    0.48 
 -15   0  -8   -0.09    0.49 
 -15   0  -8   -0.06    0.49 
  15   0   8    0.53    0.42 
  16   0   8    3.21    0.48 
 -16   0  -8    3.26    0.59 
 -16   0  -8    2.99    0.53 
 -16  -1   8    1.37    0.59 
 -16   1   8    0.75    0.60 
  15  -1  -8    0.28    0.44 
 -15  -1   8    0.58    0.56 
 -15   1   8    0.38    0.56 
  14  -1  -8    1.01    0.42 
 -14  -1   8    1.85    0.55 
 -14   1   8    1.18    0.55 
 -13  -1   8    1.97    0.52 
  13  -1  -8    1.23    0.37 
 -13   1   8    1.74    0.51 
  12  -1  -8    0.41    0.34 
 -12  -1   8    1.16    0.48 
 -12  -1   8    0.51    0.28 
  12   1  -8    0.40    0.30 
 -12   1   8    0.42    0.47 
 -11  -1   8    1.19    0.45 
 -11  -1   8    1.16    0.26 
  11  -1  -8    1.10    0.34 
  11   1  -8    1.00    0.30 
 -11   1   8    0.83    0.45 
  10  -1  -8    3.67    0.35 
 -10  -1   8    3.74    0.27 
 -10  -1   8    3.81    0.43 
 -10   1   8    3.48    0.45 
  -9  -1   8   13.25    0.69 
  -9  -1   8   11.95    0.47 
   9  -1  -8   12.25    0.50 
  -9   1   8   12.65    0.66 
  -8  -1   8    6.46    0.46 
   8  -1  -8    5.56    0.34 
  -8  -1   8    6.57    0.37 
  -8   1   8    5.59    0.39 
  -8   1   8    5.83    0.42 
  -7  -1   8    2.56    0.37 
  -7  -1   8    3.28    0.21 
  -7   1   8    3.08    0.24 
  -7   1   8    3.28    0.34 
  -6  -1   8    4.43    0.37 
  -6  -1   8    4.50    0.32 
  -6   1   8    4.31    0.34 
  -6   1   8    3.69    0.24 
  -5  -1   8   37.91    0.81 
  -5  -1   8   38.27    1.03 
  -5   1   8   38.56    1.02 
  -5   1   8   38.77    0.84 
  -4  -1   8   62.27    1.48 
  -4  -1   8   61.51    1.23 
  -4   1   8   60.54    1.25 
  -4   1   8   61.35    1.47 
  -3  -1   8  153.49    2.91 
  -3  -1   8  150.33    3.42 
  -3   1   8  152.16    3.42 
  -3   1   8  152.50    2.93 
  -2  -1   8  120.44    2.31 
  -2  -1   8  118.69    2.71 
  -2   1   8  122.04    2.33 
  -2   1   8  119.30    2.70 
  -1  -1   8   38.75    0.97 
  -1  -1   8   39.02    0.83 
  -1   1   8   40.61    0.94 
  -1   1   8   40.95    0.85 
   0  -1   8   30.60    0.75 
   0  -1   8   29.99    0.66 
   0   1   8   29.97    0.66 
   0   1   8   29.88    0.72 
   1  -1   8   25.78    0.60 
   1  -1   8   27.29    0.68 
   1   1   8   26.59    0.59 
   1   1   8   26.18    0.63 
   2  -1   8    4.67    0.25 
   2  -1   8    5.24    0.28 
   2   1   8    5.06    0.22 
   2   1   8    4.63    0.30 
   3  -1   8    3.10    0.23 
   3  -1   8    3.03    0.19 
   3   1   8    2.38    0.18 
   3   1   8    3.16    0.20 
   4  -1   8    2.00    0.20 
   4  -1   8    2.36    0.23 
   4   1   8    1.97    0.18 
   5  -1   8   12.42    0.40 
   5  -1   8   12.28    0.44 
   5   1   8   12.56    0.42 
  -6  -1  -8    0.68    0.26 
   6  -1   8    0.90    0.21 
   6   1   8    0.33    0.20 
   7  -1   8    1.66    0.23 
  -7  -1  -8    1.37    0.30 
   7   1   8    1.68    0.24 
  -8  -1  -8    6.81    0.51 
   8  -1   8    6.58    0.38 
   8   1   8    6.97    0.42 
  -9  -1  -8    9.05    0.53 
  -9  -1  -8    9.64    0.50 
   9  -1   8    8.84    0.49 
   9   1   8    9.44    0.47 
  10  -1   8    3.21    0.33 
 -10  -1  -8    3.32    0.33 
 -10  -1  -8    3.74    0.38 
 -10   1  -8    3.84    0.37 
  10   1   8    3.54    0.32 
 -11  -1  -8    1.28    0.40 
  11  -1   8    0.98    0.33 
 -11  -1  -8    0.81    0.36 
 -11   1  -8    1.09    0.37 
  11   1   8    0.92    0.30 
  12  -1   8    3.11    0.37 
 -12  -1  -8    3.39    0.43 
 -12  -1  -8    3.21    0.40 
 -12   1  -8    2.79    0.41 
  12   1   8    2.81    0.36 
  13  -1   8    2.35    0.39 
 -13  -1  -8    2.83    0.45 
 -13  -1  -8    1.96    0.47 
 -13   1  -8    2.33    0.44 
  13   1   8    2.10    0.37 
 -13   1  -8    2.38    0.42 
 -14  -1  -8    0.39    0.46 
  14  -1   8    0.49    0.40 
 -14  -1  -8    1.03    0.46 
  14   1   8    0.52    0.40 
 -14   1  -8    0.12    0.49 
 -14   1  -8    0.81    0.43 
 -15  -1  -8   -0.03    0.52 
  15  -1   8   -0.30    0.42 
 -15   1  -8    0.33    0.49 
 -15   1  -8   -0.13    0.54 
  15   1   8    0.17    0.41 
 -16  -1  -8   -0.28    0.56 
  16  -1   8   -0.25    0.45 
  16   1   8    0.13    0.46 
 -16   1  -8   -0.08    0.54 
 -16  -2   8    0.50    0.59 
  16  -2  -8   -0.25    0.50 
 -16   2   8    0.13    0.61 
  15  -2  -8    0.54    0.45 
 -15  -2   8    1.50    0.58 
 -15   2   8    1.04    0.58 
  14  -2  -8   -0.61    0.44 
 -14  -2   8    0.84    0.56 
 -14   2   8    0.59    0.55 
  13  -2  -8    3.31    0.43 
 -13  -2   8    3.38    0.56 
 -13   2   8    2.74    0.56 
  12  -2  -8    0.07    0.36 
 -12  -2   8    0.67    0.45 
 -12   2   8    0.44    0.48 
  11  -2  -8   23.79    0.72 
 -11  -2   8   22.58    0.91 
 -11   2   8   23.69    0.91 
 -10  -2   8    6.09    0.38 
  10  -2  -8    5.98    0.40 
 -10  -2   8    6.01    0.52 
 -10   2   8    6.03    0.48 
  -9  -2   8   30.10    0.71 
  -9  -2   8   30.04    1.01 
   9  -2  -8   30.49    0.80 
  -9   2   8   32.06    0.97 
  -8  -2   8    7.86    0.35 
  -8  -2   8    8.12    0.63 
   8  -2  -8    6.65    0.45 
  -8   2   8    6.63    0.55 
  -7  -2   8    0.82    0.17 
   7  -2  -8    0.40    0.27 
  -7  -2   8    0.25    0.32 
  -7   2   8    0.84    0.31 
  -7   2   8    0.53    0.23 
  -6  -2   8   10.58    0.36 
  -6  -2   8   10.02    0.58 
  -6   2   8   10.13    0.44 
  -6   2   8   10.24    0.50 
  -5  -2   8   10.55    0.34 
  -5  -2   8   10.09    0.45 
  -5   2   8    9.67    0.42 
  -5   2   8   10.32    0.50 
  -4  -2   8   37.54    0.77 
  -4  -2   8   36.59    0.96 
  -4   2   8   35.25    0.82 
  -4   2   8   36.30    0.93 
  -3  -2   8    0.43    0.13 
  -3  -2   8    0.42    0.24 
  -3   2   8    0.25    0.18 
  -3   2   8    0.57    0.21 
  -2  -2   8    0.96    0.23 
  -2  -2   8    1.07    0.14 
  -2   2   8    0.98    0.17 
  -2   2   8    1.22    0.19 
  -1  -2   8   29.35    0.77 
  -1  -2   8   28.63    0.63 
  -1   2   8   30.06    0.68 
  -1   2   8   29.37    0.72 
   0  -2   8    0.06    0.20 
   0  -2   8    0.50    0.14 
   0   2   8    0.15    0.17 
   0   2   8    0.35    0.13 
  -1  -2  -8   22.90    0.63 
   1  -2   8   22.51    0.53 
   1  -2   8   22.54    0.62 
   1   2   8   22.81    0.54 
   1   2   8   23.09    0.54 
   2  -2   8  103.41    2.03 
  -2  -2  -8  103.40    2.24 
   2  -2   8  103.69    2.37 
   2   2   8  107.28    2.05 
   3  -2   8  114.84    2.59 
   3  -2   8  113.64    2.22 
  -3  -2  -8  113.96    2.45 
   3   2   8  114.56    2.23 
   4  -2   8    0.79    0.19 
  -4  -2  -8    1.15    0.25 
   4  -2   8    0.57    0.24 
   4   2   8    0.88    0.17 
   5  -2   8   30.99    0.73 
   5  -2   8   31.06    0.81 
  -5  -2  -8   31.60    0.83 
   5   2   8   30.30    0.70 
  -6  -2  -8    4.11    0.32 
   6  -2   8    4.39    0.27 
   6  -2   8    4.49    0.36 
  -6  -2  -8    4.19    0.30 
   6   2   8    3.63    0.25 
  -7  -2  -8   12.70    0.47 
  -7  -2  -8   12.21    0.56 
   7  -2   8   11.60    0.45 
   7   2   8   12.68    0.45 
   8  -2   8   11.55    0.45 
  -8  -2  -8   11.59    0.57 
  -8  -2  -8   10.74    0.46 
   8   2   8   10.57    0.45 
  -9  -2  -8    5.16    0.34 
   9  -2   8    4.87    0.32 
  -9  -2  -8    4.80    0.39 
   9   2   8    4.58    0.32 
  10  -2   8    3.72    0.35 
 -10  -2  -8    4.22    0.37 
 -10  -2  -8    3.26    0.39 
  10   2   8    3.55    0.32 
 -11  -2  -8    2.52    0.41 
 -11  -2  -8    2.94    0.39 
  11  -2   8    1.67    0.32 
  11   2   8    2.52    0.33 
 -12  -2  -8    1.16    0.41 
 -12  -2  -8    1.86    0.39 
  12  -2   8    0.39    0.36 
  12   2   8    1.05    0.33 
 -12   2  -8    1.63    0.42 
  13  -2   8    1.06    0.39 
 -13  -2  -8    0.53    0.47 
 -13   2  -8    1.21    0.42 
  13   2   8    0.32    0.37 
  14  -2   8   -0.27    0.42 
 -14  -2  -8    0.41    0.51 
 -14   2  -8    0.58    0.52 
 -14   2  -8    0.29    0.45 
  14   2   8    0.11    0.37 
  15  -2   8    3.10    0.48 
 -15  -2  -8    3.04    0.57 
 -15   2  -8    3.18    0.58 
 -15   2  -8    3.41    0.51 
  15   2   8    3.38    0.43 
  16  -2   8    0.83    0.49 
 -16  -2  -8   -0.45    0.56 
 -16   2  -8    0.14    0.62 
  16   2   8    0.14    0.43 
 -16  -3   8    0.94    0.62 
  16  -3  -8    0.83    0.51 
 -16   3   8    0.31    0.65 
  15  -3  -8    0.70    0.48 
 -15  -3   8    1.44    0.61 
 -15   3   8    0.60    0.62 
 -14  -3   8    5.76    0.66 
  14  -3  -8    5.32    0.51 
 -14   3   8    5.59    0.65 
 -13  -3   8    0.22    0.54 
  13  -3  -8    0.57    0.42 
 -13   3   8   -0.08    0.54 
 -12  -3   8    3.33    0.56 
  12  -3  -8    2.35    0.42 
 -12   3   8    2.46    0.53 
 -11  -3   8   -0.26    0.39 
  11  -3  -8    0.29    0.36 
 -11  -3   8    0.44    0.49 
 -11   3   8   -0.19    0.44 
  10  -3  -8    2.07    0.36 
 -10  -3   8    1.65    0.49 
 -10  -3   8    1.59    0.39 
 -10   3   8    1.68    0.43 
  -9  -3   8    1.43    0.45 
   9  -3  -8    0.62    0.33 
  -9   3   8    0.92    0.39 
  -8  -3   8    6.47    0.52 
   8  -3  -8    7.02    0.48 
  -8   3   8    6.64    0.54 
   7  -3  -8    0.12    0.29 
  -7  -3   8   -0.07    0.38 
  -7  -3   8    0.09    0.15 
  -7   3   8   -0.05    0.30 
  -7   3   8   -0.24    0.25 
  -6  -3   8    9.27    0.32 
  -6  -3   8    8.73    0.53 
  -6   3   8    9.14    0.47 
  -6   3   8    8.32    0.40 
  -5  -3   8   11.92    0.50 
   5  -3  -8   11.17    0.37 
  -5  -3   8   13.08    0.35 
  -5   3   8   12.44    0.52 
  -5   3   8   12.80    0.48 
  -4  -3   8   26.74    0.78 
   4  -3  -8   26.07    0.65 
  -4  -3   8   26.70    0.59 
  -4   3   8   26.91    0.74 
  -4   3   8   26.44    0.68 
   3  -3  -8   27.14    0.67 
  -3  -3   8   26.55    0.76 
  -3  -3   8   27.60    0.60 
  -3   3   8   27.66    0.72 
  -3   3   8   26.28    0.68 
  -2  -3   8    1.27    0.26 
  -2  -3   8    1.20    0.15 
   2  -3  -8    1.23    0.21 
  -2   3   8    1.64    0.20 
  -2   3   8    0.99    0.21 
  -1  -3   8   71.58    1.68 
   1  -3  -8   72.82    1.57 
  -1  -3   8   72.45    1.41 
  -1   3   8   69.54    1.62 
  -1   3   8   71.70    1.44 
   0  -3   8   17.65    0.55 
   0  -3   8   17.73    0.44 
   0  -3  -8   18.44    0.57 
   0   3   8   18.21    0.48 
   0   3   8   18.05    0.44 
   1  -3   8    4.10    0.33 
   1  -3   8    3.99    0.27 
  -1  -3  -8    4.38    0.27 
   1   3   8    4.14    0.29 
   2  -3   8   58.38    1.18 
   2  -3   8   58.17    1.39 
  -2  -3  -8   58.56    1.33 
   2   3   8   57.29    1.19 
   3  -3   8    0.14    0.24 
  -3  -3  -8    0.08    0.25 
   3  -3   8   -0.07    0.18 
   3   3   8    0.17    0.19 
   4  -3   8    8.93    0.43 
   4  -3   8   10.11    0.40 
  -4  -3  -8    9.27    0.49 
   4   3   8    9.42    0.40 
   5  -3   8    1.49    0.29 
  -5  -3  -8    0.85    0.28 
   5  -3   8    1.43    0.23 
   5   3   8    1.07    0.19 
  -6  -3  -8    3.79    0.31 
   6  -3   8    5.05    0.36 
   6  -3   8    3.79    0.25 
  -6  -3  -8    2.57    0.26 
   6   3   8    3.91    0.26 
  -7  -3  -8    0.90    0.31 
   7  -3   8    0.78    0.26 
   7  -3   8    0.51    0.33 
   7   3   8    0.21    0.23 
  -8  -3  -8    6.52    0.42 
  -8  -3  -8    6.23    0.38 
   8  -3   8    7.30    0.47 
   8   3   8    6.43    0.41 
  -9  -3  -8    0.04    0.31 
   9  -3   8    0.31    0.29 
  -9  -3  -8    0.33    0.34 
   9   3   8    0.38    0.26 
 -10  -3  -8    0.48    0.38 
  10  -3   8    0.26    0.29 
  10   3   8   -0.15    0.28 
 -11  -3  -8    4.44    0.46 
  11  -3   8    3.65    0.39 
  11   3   8    3.06    0.34 
 -12  -3  -8    5.07    0.50 
  12  -3   8    5.12    0.44 
  12   3   8    4.57    0.39 
 -13  -3  -8    3.32    0.50 
  13  -3   8    2.58    0.39 
 -13   3  -8    4.58    0.48 
  13   3   8    2.82    0.37 
 -14  -3  -8    0.63    0.53 
  14  -3   8    0.24    0.44 
  14   3   8    0.47    0.40 
 -14   3  -8    1.27    0.49 
 -15  -3  -8    0.45    0.52 
  15  -3   8    0.09    0.46 
  15   3   8   -0.17    0.41 
 -15   3  -8   -0.73    0.54 
  16  -3   8    1.05    0.50 
 -16  -3  -8    1.03    0.61 
 -16   3  -8    0.11    0.62 
  16   3   8   -0.27    0.45 
 -16  -4   8    1.02    0.65 
  16  -4  -8   -0.17    0.53 
 -16   4   8   -0.54    0.66 
 -15  -4   8    0.75    0.62 
  15  -4  -8   -0.51    0.52 
 -15   4   8   -0.34    0.62 
  14  -4  -8   -0.10    0.47 
 -14  -4   8    1.11    0.60 
 -14   4   8    0.83    0.60 
  13  -4  -8    0.25    0.44 
 -13  -4   8    1.20    0.59 
 -13   4   8    0.80    0.56 
 -12  -4   8    3.54    0.59 
 -12  -4   8    3.49    0.48 
  12  -4  -8    3.49    0.46 
 -12   4   8    3.88    0.56 
 -11  -4   8    2.72    0.45 
 -11  -4   8    2.42    0.56 
  11  -4  -8    1.81    0.41 
 -11   4   8    1.57    0.48 
  10  -4  -8    0.86    0.38 
 -10  -4   8    0.83    0.52 
 -10  -4   8    0.59    0.41 
 -10   4   8    1.47    0.43 
  -9  -4   8    0.11    0.47 
  -9  -4   8   -0.55    0.38 
   9  -4  -8   -0.18    0.34 
  -9   4   8    0.16    0.41 
   8  -4  -8    2.59    0.36 
  -8  -4   8    2.07    0.47 
  -8  -4   8    2.86    0.37 
  -8   4   8    3.01    0.38 
   7  -4  -8   20.68    0.67 
  -7  -4   8   20.45    0.78 
  -7   4   8   20.35    0.69 
  -7   4   8   19.58    0.65 
  -6  -4   8   14.32    0.64 
  -6   4   8   13.82    0.58 
  -6   4   8   13.75    0.55 
  -5  -4   8   32.20    0.68 
  -5  -4   8   33.00    0.94 
   5  -4  -8   34.53    0.77 
  -5   4   8   34.48    0.84 
  -5   4   8   34.38    0.88 
   4  -4  -8   14.17    0.46 
  -4  -4   8   13.99    0.36 
  -4  -4   8   14.70    0.57 
  -4   4   8   14.48    0.52 
  -4   4   8   14.85    0.50 
  -3  -4   8    6.10    0.42 
   3  -4  -8    6.00    0.36 
  -3  -4   8    5.89    0.27 
  -3   4   8    6.52    0.42 
  -3   4   8    6.16    0.33 
  -2  -4   8    0.53    0.29 
  -2  -4   8    0.64    0.14 
   2  -4  -8    0.71    0.21 
  -2   4   8    0.41    0.19 
  -2   4   8    0.70    0.21 
  -1  -4   8    7.98    0.32 
  -1  -4   8    7.77    0.38 
   1  -4  -8    8.16    0.39 
  -1   4   8    8.12    0.41 
  -1   4   8    7.85    0.33 
   0  -4   8   20.32    0.63 
   0  -4  -8   21.14    0.62 
   0  -4   8   20.96    0.51 
   0   4   8   21.56    0.58 
   0   4   8   20.29    0.51 
   1  -4   8    5.56    0.39 
  -1  -4  -8    6.65    0.48 
   1  -4   8    5.82    0.33 
   1   4   8    6.11    0.38 
   2  -4   8    0.25    0.28 
  -2  -4  -8    0.67    0.26 
   2  -4   8    0.54    0.18 
   2   4   8    0.70    0.21 
  -3  -4  -8    3.88    0.32 
   3  -4   8    4.16    0.33 
   3  -4   8    3.69    0.23 
   3   4   8    3.18    0.25 
   4  -4   8    8.64    0.46 
  -4  -4  -8    8.65    0.53 
   4  -4   8    9.16    0.42 
   4   4   8    8.67    0.40 
   5  -4   8    0.70    0.32 
  -5  -4  -8    0.55    0.27 
   5  -4   8    0.87    0.24 
   5   4   8    0.56    0.22 
   6  -4   8   10.14    0.51 
   6  -4   8   10.66    0.49 
  -6  -4  -8   10.89    0.60 
   6   4   8   10.43    0.45 
  -7  -4  -8    2.78    0.34 
   7  -4   8    2.46    0.30 
   7  -4   8    3.18    0.40 
   7   4   8    2.97    0.27 
   8  -4   8   -0.43    0.28 
  -8  -4  -8    0.05    0.37 
   8   4   8    0.12    0.25 
   9  -4   8    1.12    0.33 
  -9  -4  -8    1.46    0.40 
   9   4   8    0.88    0.27 
 -10  -4  -8    1.42    0.43 
  10  -4   8    1.35    0.36 
  10   4   8    1.86    0.30 
  11  -4   8    2.06    0.39 
 -11  -4  -8    1.37    0.45 
  11   4   8    2.01    0.34 
  12  -4   8    0.06    0.39 
 -12  -4  -8    0.00    0.46 
  12   4   8   -0.24    0.34 
  13  -4   8    0.18    0.42 
 -13  -4  -8    0.01    0.50 
  13   4   8    0.04    0.36 
  14  -4   8    1.08    0.46 
 -14  -4  -8    1.98    0.54 
  14   4   8    1.46    0.38 
  15  -4   8    0.90    0.49 
 -15  -4  -8    1.13    0.56 
  15  -5  -8    2.66    0.55 
 -15  -5   8    4.06    0.76 
 -15   5   8    2.21    0.70 
  14  -5  -8    0.73    0.51 
 -14  -5   8    0.17    0.68 
 -14   5   8    0.22    0.63 
 -13  -5   8    5.56    0.74 
 -13  -5   8    6.36    0.59 
  13  -5  -8    5.88    0.54 
 -13   5   8    6.05    0.64 
 -12  -5   8    1.70    0.51 
  12  -5  -8    1.65    0.47 
 -12  -5   8    1.89    0.63 
 -12   5   8    1.50    0.57 
 -11  -5   8    2.53    0.62 
  11  -5  -8    1.57    0.44 
 -11  -5   8    0.97    0.49 
 -11   5   8    2.21    0.51 
 -10  -5   8   -0.31    0.45 
  10  -5  -8    0.10    0.41 
 -10  -5   8   -0.29    0.54 
 -10   5   8    0.52    0.47 
   9  -5  -8    0.56    0.38 
  -9  -5   8    1.05    0.53 
  -9  -5   8    0.25    0.43 
  -9   5   8    0.97    0.40 
   8  -5  -8    1.08    0.37 
  -8  -5   8    0.77    0.50 
  -8  -5   8    1.59    0.43 
  -8   5   8    1.95    0.40 
   7  -5  -8   31.57    0.89 
  -7  -5   8   32.11    1.04 
  -7  -5   8   32.61    0.93 
  -7   5   8   34.02    0.95 
  -7   5   8   32.38    0.87 
   6  -5  -8   -0.42    0.30 
  -6  -5   8   -0.17    0.40 
  -6   5   8    0.23    0.29 
  -6   5   8    0.33    0.28 
   5  -5  -8    5.58    0.31 
  -5  -5   8    5.94    0.46 
  -5   5   8    5.35    0.35 
  -5   5   8    6.38    0.43 
  -4  -5   8   19.22    0.45 
  -4  -5   8   21.47    0.72 
   4  -5  -8   21.31    0.60 
  -4   5   8   21.45    0.65 
  -4   5   8   21.76    0.64 
   3  -5  -8    0.47    0.23 
  -3  -5   8    0.46    0.13 
  -3  -5   8    0.61    0.34 
  -3   5   8    0.40    0.26 
  -3   5   8    0.47    0.22 
  -2  -5   8    6.46    0.29 
  -2  -5   8    7.29    0.46 
   2  -5  -8    6.96    0.43 
  -2   5   8    8.06    0.39 
  -2   5   8    6.84    0.35 
   1  -5  -8    1.84    0.28 
  -1  -5   8    2.38    0.33 
  -1  -5   8    2.46    0.18 
  -1   5   8    2.23    0.19 
  -1   5   8    2.33    0.27 
   0  -5   8    3.10    0.20 
   0  -5  -8    3.17    0.31 
   0  -5   8    3.57    0.35 
   0   5   8    3.08    0.27 
   0   5   8    2.95    0.23 
   1  -5   8   20.54    0.54 
  -1  -5  -8   20.62    0.67 
   1  -5   8   19.59    0.67 
   1   5   8   20.36    0.55 
   2  -5   8    0.59    0.20 
   2  -5   8    0.07    0.31 
  -2  -5  -8    0.73    0.30 
   2   5   8   -0.05    0.23 
  -3  -5  -8   21.80    0.75 
   3  -5   8   22.13    0.72 
   3  -5   8   22.67    0.60 
   3   5   8   22.42    0.61 
   4  -5   8    2.88    0.26 
  -4  -5  -8    3.04    0.37 
   4  -5   8    2.86    0.37 
   4   5   8    3.32    0.26 
   5  -5   8    2.26    0.38 
   5  -5   8    2.49    0.28 
  -5  -5  -8    2.20    0.37 
   5   5   8    1.95    0.25 
  -6  -5  -8    5.44    0.43 
   6  -5   8    5.35    0.43 
   6  -5   8    5.28    0.34 
   6   5   8    5.69    0.41 
  -7  -5  -8   18.59    0.77 
   7  -5   8   18.32    0.70 
   7  -5   8   19.47    0.66 
   7   5   8   18.54    0.57 
   8  -5   8    4.69    0.38 
  -8  -5  -8    4.05    0.44 
   8  -5   8    5.22    0.47 
   8   5   8    4.58    0.31 
  -9  -5  -8    0.46    0.37 
   9  -5   8    0.24    0.34 
   9   5   8   -0.09    0.27 
 -10  -5  -8   -0.23    0.44 
  10  -5   8   -0.49    0.35 
  10   5   8    0.44    0.31 
 -11  -5  -8    0.52    0.46 
  11  -5   8   -0.28    0.39 
  11   5   8    0.09    0.33 
 -12  -5  -8    0.63    0.49 
  12  -5   8    0.92    0.39 
  12   5   8    0.80    0.35 
 -13  -5  -8    2.61    0.54 
  13  -5   8    2.10    0.46 
  13   5   8    1.71    0.38 
 -14  -5  -8    0.06    0.56 
  14  -5   8    0.14    0.47 
 -15  -5  -8    0.50    0.58 
  15  -5   8    0.12    0.50 
  14  -6  -8   -0.49    0.52 
 -14  -6   8    0.38    0.73 
 -14   6   8   -0.19    0.68 
 -13  -6   8   -0.81    0.56 
  13  -6  -8    0.06    0.50 
 -13  -6   8   -0.58    0.69 
 -13   6   8   -0.38    0.63 
  12  -6  -8   -0.12    0.47 
 -12  -6   8   -0.96    0.66 
 -12  -6   8   -0.11    0.55 
 -12   6   8   -0.17    0.58 
 -11  -6   8   -0.35    0.49 
  11  -6  -8    0.66    0.46 
 -11  -6   8   -0.22    0.63 
 -11   6   8   -0.61    0.50 
  10  -6  -8   -0.39    0.43 
 -10  -6   8    0.24    0.60 
 -10  -6   8    0.56    0.48 
 -10   6   8    0.03    0.46 
  -9  -6   8    2.39    0.60 
   9  -6  -8    2.03    0.43 
  -9  -6   8    2.47    0.50 
  -9   6   8    1.72    0.43 
  -8  -6   8    1.45    0.53 
   8  -6  -8    1.13    0.37 
  -8  -6   8    1.97    0.45 
  -8   6   8    1.02    0.42 
   7  -6  -8    6.32    0.46 
  -7  -6   8    5.49    0.56 
  -7  -6   8    5.87    0.49 
  -7   6   8    5.64    0.41 
  -7   6   8    5.29    0.44 
  -6  -6   8   13.09    0.69 
  -6  -6   8   13.02    0.67 
  -6   6   8   13.63    0.59 
  -6   6   8   12.15    0.55 
  -5  -6   8   21.59    0.78 
  -5   6   8   21.78    0.68 
  -5   6   8   20.63    0.65 
  -4  -6   8    6.81    0.54 
   4  -6  -8    6.67    0.39 
  -4   6   8    7.16    0.46 
  -4   6   8    7.57    0.42 
  -3  -6   8   -0.08    0.36 
   3  -6  -8   -0.04    0.27 
  -3   6   8   -0.13    0.26 
  -3   6   8    0.12    0.23 
   2  -6  -8    0.07    0.28 
  -2  -6   8   -0.12    0.16 
  -2  -6   8   -0.07    0.35 
  -2   6   8   -0.13    0.28 
  -2   6   8   -0.26    0.21 
   1  -6  -8    7.13    0.54 
  -1  -6   8    6.47    0.33 
  -1  -6   8    6.87    0.48 
  -1   6   8    6.61    0.32 
  -1   6   8    6.69    0.48 
   0  -6   8   11.78    0.43 
   0  -6   8   12.21    0.56 
   0  -6  -8   12.89    0.63 
   0   6   8   10.92    0.37 
   0   6   8   12.19    0.47 
   1  -6   8   10.01    0.42 
  -1  -6  -8   11.17    0.64 
   1  -6   8   10.30    0.54 
   1   6   8    9.28    0.49 
  -2  -6  -8    0.19    0.34 
   2  -6   8   -0.19    0.21 
   2  -6   8   -0.61    0.30 
   2   6   8    0.08    0.25 
  -3  -6  -8    0.05    0.35 
   3  -6   8    0.47    0.25 
   3  -6   8    0.30    0.37 
   3   6   8    0.29    0.25 
  -4  -6  -8    0.34    0.37 
   4  -6   8    0.43    0.38 
   4  -6   8    0.82    0.27 
   4   6   8    0.49    0.25 
   5  -6   8    4.74    0.45 
  -5  -6  -8    4.75    0.45 
   5  -6   8    4.59    0.33 
   5   6   8    4.09    0.29 
   6  -6   8    1.57    0.31 
   6  -6   8    1.26    0.42 
  -6  -6  -8    1.32    0.42 
   6   6   8    1.58    0.27 
   7  -6   8    3.98    0.48 
   7  -6   8    2.74    0.35 
  -7  -6  -8    2.46    0.46 
   7   6   8    2.72    0.30 
   8  -6   8    3.88    0.50 
  -8  -6  -8    2.67    0.47 
   8  -6   8    3.08    0.38 
   8   6   8    2.45    0.31 
   9  -6   8    1.66    0.38 
  -9  -6  -8    2.08    0.48 
   9   6   8    1.79    0.30 
  10  -6   8    0.97    0.41 
 -10  -6  -8    0.50    0.48 
  10   6   8    0.88    0.32 
  11  -6   8    1.22    0.44 
 -11  -6  -8    0.93    0.51 
  11   6   8    1.07    0.34 
  12  -6   8    0.60    0.46 
 -12  -6  -8    0.24    0.54 
  13  -6   8   -0.24    0.47 
 -13  -6  -8    0.16    0.60 
  14  -6   8   -0.03    0.50 
 -14  -6  -8    0.56    0.63 
 -14  -7   8    0.87    0.66 
  14  -7  -8    0.68    0.57 
 -14  -7   8    0.96    0.82 
  13  -7  -8   -0.34    0.54 
 -13  -7   8   -0.47    0.80 
 -13  -7   8   -0.47    0.62 
 -13   7   8   -0.41    0.67 
  12  -7  -8    1.62    0.53 
 -12  -7   8    0.66    0.75 
 -12  -7   8    1.64    0.61 
 -12   7   8    0.35    0.63 
 -11  -7   8   -0.08    0.67 
 -11  -7   8    1.33    0.59 
  11  -7  -8    1.36    0.50 
 -11   7   8    1.14    0.58 
 -10  -7   8   -0.31    0.64 
  10  -7  -8   -0.54    0.42 
 -10  -7   8    0.37    0.52 
 -10   7   8    0.36    0.52 
   9  -7  -8    0.38    0.45 
  -9  -7   8   -0.19    0.53 
  -9  -7   8   -0.84    0.58 
  -9   7   8    0.05    0.49 
  -8  -7   8    3.05    0.51 
   8  -7  -8    2.74    0.42 
  -8  -7   8    3.03    0.61 
  -8   7   8    3.30    0.48 
  -8   7   8    2.54    0.39 
  -7  -7   8   -1.12    0.50 
   7  -7  -8    0.18    0.42 
  -7  -7   8    0.48    0.47 
  -7   7   8    0.06    0.40 
  -7   7   8    0.43    0.38 
  -6  -7   8    4.01    0.53 
  -6  -7   8    3.74    0.49 
  -6   7   8    3.99    0.40 
  -6   7   8    3.61    0.41 
  -5  -7   8    0.08    0.45 
  -5   7   8    0.02    0.32 
  -5   7   8    0.02    0.35 
  -4  -7   8   -0.28    0.41 
   4  -7  -8   -0.01    0.28 
  -4   7   8   -0.36    0.30 
  -4   7   8    0.03    0.30 
   3  -7  -8   -0.26    0.31 
  -3  -7   8   -0.53    0.41 
  -3   7   8   -0.17    0.32 
  -3   7   8   -0.36    0.27 
  -2  -7   8    2.25    0.42 
   2  -7  -8    2.33    0.34 
  -2   7   8    2.07    0.25 
  -2   7   8    1.85    0.34 
  -1  -7   8    3.98    0.25 
  -1  -7   8    3.49    0.44 
   1  -7  -8    4.26    0.39 
  -1   7   8    3.76    0.35 
   0  -7  -8    4.15    0.41 
   0  -7   8    3.72    0.26 
   0  -7   8    4.27    0.45 
   0   7   8    3.39    0.33 
   1  -7   8   -0.12    0.22 
  -1  -7  -8    0.28    0.39 
   1  -7   8    0.06    0.39 
   1   7   8   -0.15    0.29 
   2  -7   8   14.17    0.53 
  -2  -7  -8   14.19    0.72 
   2  -7   8   12.46    0.64 
   2   7   8   13.10    0.59 
   3  -7   8    7.23    0.52 
  -3  -7  -8    7.91    0.50 
   3  -7   8    6.82    0.50 
   3   7   8    6.89    0.38 
  -4  -7  -8   -0.03    0.44 
   4  -7   8    0.48    0.28 
   4  -7   8    0.14    0.37 
   4   7   8    0.31    0.28 
   5  -7   8    0.82    0.44 
  -5  -7  -8    1.43    0.44 
   5  -7   8    0.65    0.30 
   5   7   8    1.19    0.28 
   6  -7   8    0.09    0.32 
  -6  -7  -8    0.61    0.45 
   6  -7   8    0.68    0.45 
   6   7   8    0.23    0.27 
   7  -7   8    1.22    0.35 
  -7  -7  -8    0.57    0.46 
   7  -7   8    2.05    0.49 
   7   7   8    1.61    0.31 
  -8  -7  -8    6.14    0.57 
   8  -7   8    7.32    0.48 
   8  -7   8    8.14    0.61 
   8   7   8    6.74    0.38 
   9  -7   8    1.17    0.41 
  -9  -7  -8    0.66    0.51 
   9   7   8    1.01    0.32 
 -10  -7  -8   -0.26    0.52 
  10  -7   8    0.55    0.43 
  10   7   8    0.43    0.32 
 -11  -7  -8    0.97    0.56 
  11  -7   8    0.84    0.47 
 -12  -7  -8    1.15    0.59 
  12  -7   8    1.15    0.49 
  13  -7   8   -0.56    0.51 
 -13  -7  -8   -1.10    0.63 
 -13  -8   8    0.08    0.68 
 -13  -8   8   -1.43    0.86 
  13  -8  -8    0.16    0.56 
 -12  -8   8   -0.34    0.76 
 -12  -8   8   -0.76    0.65 
  12  -8  -8   -0.03    0.55 
 -12   8   8   -0.94    0.65 
 -11  -8   8   -0.12    0.63 
 -11  -8   8    0.11    0.78 
  11  -8  -8    0.46    0.48 
 -11   8   8    0.13    0.58 
 -10  -8   8   -0.11    0.57 
 -10  -8   8   -1.01    0.68 
  10  -8  -8   -0.26    0.51 
 -10   8   8   -0.63    0.57 
  -9  -8   8   -0.15    0.63 
   9  -8  -8   -0.01    0.49 
  -9  -8   8    0.29    0.59 
  -9   8   8    0.09    0.45 
  -9   8   8   -0.62    0.52 
  -8  -8   8    0.96    0.61 
  -8  -8   8    0.96    0.55 
   8  -8  -8    1.34    0.49 
  -8   8   8    1.08    0.45 
  -8   8   8    1.61    0.49 
  -7  -8   8    0.38    0.56 
  -7  -8   8    0.82    0.53 
  -7   8   8    0.39    0.42 
  -7   8   8   -0.03    0.43 
  -6  -8   8    4.98    0.60 
  -6  -8   8    4.56    0.56 
  -6   8   8    5.19    0.46 
  -6   8   8    4.46    0.46 
  -5  -8   8    1.95    0.51 
  -5   8   8    1.61    0.39 
  -5   8   8    1.62    0.40 
  -4  -8   8   -0.41    0.47 
  -4   8   8   -0.38    0.37 
   3  -8  -8   -0.01    0.36 
  -3  -8   8    0.12    0.44 
  -3   8   8   -0.72    0.36 
   2  -8  -8    3.20    0.39 
  -2  -8   8    3.37    0.48 
  -2   8   8    3.05    0.39 
  -1  -8   8    7.39    0.54 
   1  -8  -8    7.25    0.55 
  -1   8   8    7.39    0.43 
   0  -8   8    2.01    0.46 
   0  -8  -8    1.59    0.44 
   0  -8   8    1.61    0.26 
   0   8   8    1.19    0.35 
  -1  -8  -8    1.34    0.42 
   1  -8   8    0.91    0.26 
   1  -8   8    0.91    0.44 
   1   8   8    0.43    0.32 
  -2  -8  -8    1.65    0.45 
   2  -8   8    1.90    0.47 
   2  -8   8    1.17    0.30 
   2   8   8    1.43    0.32 
   3  -8   8   -0.14    0.46 
   3  -8   8   -0.01    0.31 
  -3  -8  -8    0.02    0.44 
   3   8   8   -0.22    0.30 
   4  -8   8    2.88    0.50 
  -4  -8  -8    3.13    0.50 
   4  -8   8    3.80    0.36 
   4   8   8    3.46    0.33 
  -5  -8  -8    0.96    0.49 
   5  -8   8    0.49    0.48 
   5  -8   8    0.75    0.36 
   5   8   8    1.28    0.32 
   6  -8   8    0.09    0.35 
   6  -8   8    0.46    0.50 
  -6  -8  -8   -0.24    0.49 
   6   8   8    0.30    0.29 
   7  -8   8   -0.31    0.52 
  -7  -8  -8    0.36    0.47 
   7  -8   8   -0.09    0.38 
   7   8   8    0.09    0.32 
   8  -8   8    2.32    0.43 
   8  -8   8    2.36    0.58 
  -8  -8  -8    2.31    0.56 
   8   8   8    1.77    0.33 
   9  -8   8    0.51    0.45 
  -9  -8  -8   -0.04    0.54 
 -10  -8  -8    3.02    0.60 
  10  -8   8    2.42    0.49 
 -11  -8  -8    1.14    0.60 
  11  -8   8    0.37    0.50 
 -12  -8  -8    0.34    0.62 
  12  -8   8   -0.27    0.52 
 -11  -9   8    0.54    0.64 
 -11  -9   8   -0.42    0.76 
  11  -9  -8    0.38    0.52 
 -11   9   8   -0.74    0.64 
 -11   9   8    0.06    0.53 
 -10  -9   8    0.42    0.63 
  10  -9  -8    1.10    0.56 
 -10  -9   8    0.62    0.78 
 -10   9   8    0.99    0.52 
 -10   9   8    1.28    0.59 
   9  -9  -8    4.11    0.58 
  -9  -9   8    2.91    0.65 
  -9  -9   8    2.76    0.78 
  -9   9   8    3.21    0.60 
  -9   9   8    3.02    0.53 
  -8  -9   8   -0.39    0.64 
  -8  -9   8    0.20    0.58 
  -8   9   8    0.25    0.49 
  -8   9   8   -0.10    0.52 
  -7  -9   8    1.65    0.60 
  -7  -9   8    1.35    0.57 
  -7   9   8    1.17    0.49 
  -7   9   8    0.76    0.48 
  -6  -9   8   -0.09    0.56 
  -6   9   8   -0.34    0.45 
  -6   9   8   -0.40    0.46 
  -5  -9   8   -0.03    0.53 
  -5   9   8    0.15    0.43 
  -4  -9   8    0.26    0.51 
  -4   9   8   -0.73    0.41 
   3  -9  -8    1.78    0.43 
  -3  -9   8    1.84    0.52 
  -3   9   8    1.80    0.43 
  -2  -9   8    2.80    0.52 
   2  -9  -8    2.83    0.45 
  -2   9   8    2.90    0.42 
  -1  -9   8   -0.17    0.49 
   1  -9  -8   -0.32    0.44 
  -1   9   8   -0.18    0.37 
   0  -9  -8   -0.81    0.45 
   0  -9   8    0.33    0.48 
   0   9   8   -0.65    0.35 
   1  -9   8    9.07    0.67 
  -1  -9  -8    7.48    0.55 
   1   9   8    7.97    0.47 
   2  -9   8    1.21    0.51 
  -2  -9  -8    0.20    0.48 
   2  -9   8    0.38    0.34 
   2   9   8    0.60    0.34 
   3  -9   8    3.99    0.39 
   3  -9   8    4.68    0.57 
  -3  -9  -8    4.30    0.57 
   3   9   8    4.53    0.38 
   4  -9   8    0.17    0.36 
  -4  -9  -8    0.62    0.54 
   4  -9   8    0.29    0.52 
   4   9   8    0.52    0.34 
  -5  -9  -8   -0.74    0.53 
   5  -9   8    0.25    0.37 
   5  -9   8    0.40    0.52 
   5   9   8    0.15    0.32 
  -6  -9  -8    0.86    0.56 
   6  -9   8    1.47    0.56 
   6  -9   8    0.77    0.40 
   6   9   8    0.73    0.33 
   7  -9   8    0.33    0.42 
  -7  -9  -8   -0.03    0.58 
   7  -9   8    0.29    0.57 
  -8  -9  -8    0.44    0.60 
   8  -9   8    0.98    0.58 
   8  -9   8    0.16    0.44 
  -9  -9  -8    1.09    0.63 
   9  -9   8    1.91    0.50 
  10  -9   8    0.53    0.51 
 -10  -9  -8    0.24    0.63 
 -11  -9  -8    0.17    0.65 
  11  -9   8    0.66    0.54 
 -10 -10   8    0.05    0.68 
 -10 -10   8    0.82    0.79 
  10 -10  -8   -0.50    0.54 
 -10  10   8    0.48    0.56 
  -9 -10   8   -1.24    0.71 
  -9 -10   8   -0.10    0.66 
  -9  10   8    1.00    0.56 
  -9  10   8   -0.76    0.61 
  -8 -10   8   -0.60    0.67 
  -8 -10   8   -0.18    0.63 
  -8  10   8   -0.20    0.52 
  -7 -10   8   -0.17    0.64 
  -7 -10   8    0.17    0.63 
  -7  10   8    0.01    0.51 
  -6 -10   8   -1.08    0.59 
  -6  10   8   -0.49    0.49 
  -5 -10   8    0.20    0.61 
  -5  10   8    0.05    0.47 
  -4 -10   8    0.69    0.60 
  -4  10   8   -0.89    0.45 
  -3 -10   8   -0.23    0.54 
  -3  10   8   -0.25    0.45 
   2 -10  -8    0.32    0.47 
  -2 -10   8    0.79    0.58 
  -2  10   8    0.69    0.45 
   1 -10  -8   -0.74    0.48 
  -1 -10   8   -0.52    0.52 
  -1  10   8    0.09    0.42 
   0 -10   8    3.60    0.61 
   0 -10  -8    2.89    0.55 
   0  10   8    3.73    0.46 
  -1 -10  -8   -0.40    0.50 
   1 -10   8   -0.13    0.54 
   1  10   8   -0.18    0.38 
   2 -10   8   -0.52    0.55 
  -2 -10  -8   -0.13    0.52 
   2  10   8   -0.01    0.37 
   3 -10   8    0.72    0.38 
  -3 -10  -8    0.57    0.56 
   3 -10   8    0.17    0.60 
   3  10   8    0.91    0.39 
  -4 -10  -8    1.59    0.59 
   4 -10   8    1.58    0.60 
   4 -10   8    1.56    0.43 
   4  10   8    1.02    0.38 
   5 -10   8    0.23    0.59 
  -5 -10  -8   -0.38    0.59 
   5 -10   8    0.22    0.44 
   5  10   8   -0.26    0.36 
  -6 -10  -8    0.11    0.60 
   6 -10   8    0.28    0.44 
   6 -10   8    0.26    0.59 
  -7 -10  -8    0.59    0.63 
   7 -10   8   -0.18    0.47 
   7 -10   8   -1.23    0.61 
   8 -10   8   -0.23    0.49 
   8 -10   8    0.90    0.63 
  -8 -10  -8    0.32    0.65 
  -9 -10  -8    0.05    0.66 
   9 -10   8    0.53    0.53 
  -8 -11   8   -0.06    0.77 
  -7 -11   8   -0.43    0.67 
  -7  11   8    0.27    0.55 
  -6 -11   8   -0.69    0.69 
  -6  11   8   -0.78    0.53 
  -5 -11   8   -0.05    0.63 
  -5  11   8   -0.16    0.52 
  -4 -11   8    0.38    0.66 
  -4  11   8    0.15    0.50 
  -3 -11   8    0.60    0.60 
  -3  11   8   -0.34    0.49 
  -2 -11   8    0.09    0.58 
  -2  11   8   -0.79    0.47 
  -1 -11   8   -0.57    0.58 
   1 -11  -8   -0.67    0.55 
  -1  11   8   -1.07    0.48 
   0 -11   8   -0.70    0.57 
   0 -11  -8    0.24    0.54 
   0  11   8   -0.12    0.43 
   1 -11   8    0.40    0.61 
  -1 -11  -8    0.10    0.60 
   1  11   8    1.10    0.43 
   2 -11   8    0.44    0.61 
  -2 -11  -8   -0.58    0.62 
   2  11   8   -0.50    0.43 
   3 -11   8   -0.47    0.60 
  -3 -11  -8   -0.60    0.60 
   3  11   8   -0.15    0.39 
   4 -11   8   -0.60    0.66 
  -4 -11  -8    0.42    0.63 
   5 -11   8   -0.53    0.47 
   5 -11   8    0.00    0.64 
  -5 -11  -8    0.22    0.64 
   6 -11   8    0.89    0.67 
  -6 -11  -8   -0.08    0.67 
   6 -11   8    0.46    0.52 
  -7 -11  -8   -0.14    0.69 
   7 -11   8   -0.24    0.50 
   7 -11   8    0.49    0.70 
  -4 -12   8    0.41    0.66 
  -4  12   8   -0.40    0.53 
  -3 -12   8    0.79    0.70 
  -3  12   8   -1.12    0.56 
  -2 -12   8    0.19    0.63 
  -2  12   8   -0.65    0.54 
  -1 -12   8    1.73    0.66 
  -1  12   8    0.61    0.50 
   0 -12   8   -1.08    0.63 
   0 -12  -8   -0.64    0.64 
   0  12   8   -0.11    0.48 
  -1 -12  -8   -1.10    0.61 
   1 -12   8   -0.38    0.64 
   1  12   8    0.05    0.49 
  -2 -12  -8   -0.65    0.68 
   2 -12   8    0.36    0.65 
  -3 -12  -8   -0.27    0.67 
   3 -12   8   -0.31    0.67 
   4 -12   8   -0.05    0.67 
  -4 -12  -8   -1.27    0.73 
 -16   0   9    1.16    0.59 
 -15   0   9    2.41    0.60 
 -14   0   9    0.84    0.54 
 -13   0   9   13.22    0.81 
 -13   0   9   12.63    0.59 
  13   0  -9   13.20    0.62 
 -12   0   9    0.38    0.31 
 -12   0   9    0.71    0.48 
 -11   0   9   14.96    0.78 
 -11   0   9   14.37    0.57 
 -10   0   9    0.20    0.41 
 -10   0   9    0.09    0.26 
  -9   0   9    0.99    0.25 
  -9   0   9    1.23    0.40 
  -8   0   9    0.13    0.35 
  -8   0   9    0.29    0.21 
  -7   0   9   21.78    0.76 
  -7   0   9   20.70    0.56 
  -6   0   9    0.10    0.19 
  -6   0   9    0.21    0.33 
  -5   0   9   16.90    0.62 
  -5   0   9   17.03    0.50 
  -4   0   9   -0.12    0.17 
  -4   0   9    0.14    0.25 
  -3   0   9    6.66    0.35 
  -3   0   9    6.94    0.32 
  -2   0   9    0.23    0.16 
  -2   0   9    0.19    0.21 
  -1   0   9    1.32    0.17 
  -1   0   9    1.84    0.21 
   0   0   9    0.07    0.16 
   0   0   9    0.07    0.17 
   1   0   9   15.28    0.44 
   1   0   9   15.92    0.45 
   2   0   9   -0.42    0.17 
   2   0   9    0.22    0.17 
   3   0   9  143.03    3.17 
   3   0   9  141.80    2.75 
   4   0   9    0.05    0.19 
   4   0   9    0.12    0.20 
   5   0   9    1.03    0.24 
   5   0   9    1.22    0.21 
   6   0   9   -0.21    0.22 
   7   0   9    6.40    0.42 
   8   0   9   -0.05    0.26 
  -8   0  -9   -0.12    0.30 
  -9   0  -9    1.56    0.35 
   9   0   9    1.51    0.29 
  10   0   9    0.47    0.31 
 -10   0  -9   -0.27    0.36 
  11   0   9    1.36    0.34 
 -11   0  -9    1.15    0.39 
 -12   0  -9    0.06    0.39 
  12   0   9   -0.51    0.31 
 -12   0  -9   -0.33    0.38 
 -13   0  -9    6.21    0.53 
 -13   0  -9    5.36    0.51 
  13   0   9    5.04    0.44 
 -14   0  -9    0.07    0.48 
  14   0   9   -0.15    0.40 
 -14   0  -9    0.20    0.49 
 -15   0  -9   -0.29    0.52 
  15   0   9   -0.01    0.43 
 -15   0  -9   -0.12    0.49 
 -16   0  -9    0.63    0.56 
  16   0   9   -0.32    0.46 
 -16  -1   9    0.42    0.58 
 -16   1   9    0.39    0.59 
 -15  -1   9    0.70    0.57 
 -15   1   9    1.15    0.59 
  14  -1  -9    0.53    0.43 
 -14  -1   9    0.52    0.54 
 -14   1   9    0.90    0.55 
  13  -1  -9    0.26    0.38 
 -13  -1   9    0.77    0.52 
 -13   1   9    0.59    0.51 
  12  -1  -9    0.27    0.38 
 -12  -1   9    0.48    0.48 
 -12   1   9    0.73    0.33 
 -12   1   9    0.63    0.49 
 -11  -1   9    0.13    0.46 
 -11  -1   9    0.11    0.24 
  11  -1  -9    0.07    0.34 
 -11   1   9    0.29    0.45 
 -11   1   9    0.63    0.30 
 -10  -1   9    0.34    0.23 
 -10  -1   9    0.52    0.43 
 -10   1   9    0.42    0.27 
 -10   1   9    0.75    0.43 
  -9  -1   9    1.71    0.42 
  -9  -1   9    1.57    0.24 
  -9   1   9    0.90    0.26 
  -9   1   9    1.75    0.41 
  -8  -1   9    1.96    0.39 
  -8  -1   9    1.81    0.22 
  -8   1   9    1.10    0.24 
  -8   1   9    1.67    0.37 
  -7  -1   9   24.82    0.86 
  -7  -1   9   25.90    0.62 
  -7   1   9   26.10    0.82 
  -7   1   9   25.22    0.68 
  -6  -1   9   17.62    0.51 
  -6  -1   9   16.75    0.69 
  -6   1   9   18.56    0.52 
  -6   1   9   17.46    0.65 
  -5  -1   9   77.89    1.56 
  -5  -1   9   78.19    1.88 
  -5   1   9   78.00    1.58 
  -5   1   9   80.10    1.86 
  -4  -1   9   14.03    0.52 
  -4  -1   9   15.04    0.43 
  -4   1   9   14.46    0.52 
  -4   1   9   14.20    0.46 
  -3  -1   9    1.38    0.26 
  -3  -1   9    1.19    0.17 
  -3   1   9    1.64    0.25 
  -3   1   9    1.16    0.20 
  -2  -1   9    0.23    0.22 
  -2  -1   9    0.23    0.15 
  -2   1   9    0.34    0.18 
  -2   1   9    0.41    0.20 
  -1  -1   9    2.57    0.18 
  -1  -1   9    2.78    0.25 
  -1   1   9    3.11    0.21 
  -1   1   9    2.34    0.19 
   0  -1   9   24.20    0.58 
   0  -1   9   24.66    0.65 
   0   1   9   24.51    0.62 
   0   1   9   24.56    0.60 
   1  -1   9    3.26    0.20 
   1  -1   9    3.30    0.28 
   1   1   9    3.00    0.21 
   1   1   9    3.58    0.22 
   2  -1   9    3.73    0.22 
   2  -1   9    3.76    0.29 
   2   1   9    3.91    0.23 
   2   1   9    4.11    0.23 
   3  -1   9    0.26    0.16 
   3  -1   9    0.73    0.21 
   3   1   9    0.76    0.16 
   3   1   9    0.67    0.17 
   4  -1   9    8.16    0.36 
   4  -1   9    7.49    0.34 
   4   1   9    6.75    0.30 
   4   1   9    7.58    0.33 
   5  -1   9    4.97    0.36 
   5  -1   9    5.24    0.34 
   5   1   9    4.37    0.26 
   6  -1   9    6.34    0.36 
  -6  -1  -9    7.01    0.50 
   6  -1   9    6.54    0.42 
   6   1   9    7.77    0.40 
   7  -1   9    6.00    0.37 
  -7  -1  -9    5.16    0.36 
   7   1   9    5.91    0.41 
  -8  -1  -9    0.10    0.32 
   8  -1   9    0.16    0.26 
   8   1   9    0.40    0.26 
   9  -1   9    0.73    0.27 
  -9  -1  -9    0.53    0.34 
   9   1   9    0.73    0.26 
 -10  -1  -9   14.73    0.63 
  10  -1   9   15.55    0.59 
 -10  -1  -9   14.02    0.64 
  10   1   9   14.51    0.56 
 -11  -1  -9    5.73    0.41 
 -11  -1  -9    5.77    0.47 
  11  -1   9    5.39    0.40 
  11   1   9    5.30    0.39 
 -11   1  -9    5.93    0.44 
 -12  -1  -9    4.36    0.46 
  12  -1   9    4.06    0.40 
 -12  -1  -9    4.34    0.41 
 -12   1  -9    4.12    0.48 
  12   1   9    3.57    0.38 
  13  -1   9   -0.20    0.38 
 -13  -1  -9   -0.43    0.46 
 -13  -1  -9   -0.26    0.40 
 -13   1  -9    0.29    0.45 
  13   1   9    0.02    0.37 
 -13   1  -9   -0.07    0.44 
  14  -1   9    0.26    0.42 
 -14  -1  -9    0.84    0.47 
 -14   1  -9    0.66    0.46 
  14   1   9    0.86    0.40 
 -14   1  -9    0.71    0.50 
  15  -1   9    0.49    0.45 
 -15  -1  -9    0.69    0.54 
 -15   1  -9    0.20    0.51 
  15   1   9    0.53    0.45 
 -15   1  -9    1.13    0.51 
 -16  -1  -9   -0.01    0.54 
  16  -1   9   -0.77    0.46 
  16   1   9   -0.52    0.45 
 -16   1  -9   -0.54    0.54 
 -16   1  -9   -0.54    0.54 
 -16  -2   9    0.55    0.58 
  16  -2  -9   -0.19    0.52 
 -16   2   9    0.03    0.63 
  15  -2  -9   -0.09    0.45 
 -15  -2   9    1.26    0.58 
 -15   2   9    0.14    0.60 
 -14  -2   9    3.25    0.58 
  14  -2  -9    2.96    0.46 
 -14   2   9    2.08    0.58 
  13  -2  -9    2.50    0.45 
 -13  -2   9    2.89    0.56 
 -13   2   9    2.91    0.57 
 -12  -2   9    5.88    0.57 
  12  -2  -9    5.59    0.46 
 -12   2   9    5.62    0.57 
 -11  -2   9    0.99    0.48 
  11  -2  -9    0.31    0.35 
 -11   2   9    0.75    0.46 
 -10  -2   9    0.67    0.45 
  10  -2  -9   -0.18    0.32 
 -10   2   9    0.26    0.42 
 -10   2   9   -0.18    0.30 
  -9  -2   9   17.60    0.51 
  -9  -2   9   16.19    0.78 
   9  -2  -9   16.28    0.60 
  -9   2   9   14.96    0.74 
  -9   2   9   17.24    0.58 
  -8  -2   9   15.44    0.46 
  -8  -2   9   14.79    0.75 
  -8   2   9   15.24    0.67 
  -8   2   9   16.12    0.55 
  -7  -2   9    2.94    0.20 
  -7  -2   9    2.48    0.37 
  -7   2   9    2.49    0.27 
  -7   2   9    3.22    0.38 
  -6  -2   9    7.77    0.50 
  -6  -2   9    8.82    0.35 
  -6   2   9    8.87    0.55 
  -6   2   9    7.81    0.42 
  -5  -2   9    7.55    0.42 
  -5  -2   9    8.44    0.35 
  -5   2   9    8.06    0.42 
  -5   2   9    8.41    0.50 
  -4  -2   9    4.45    0.35 
  -4  -2   9    4.01    0.28 
  -4   2   9    4.87    0.30 
  -4   2   9    4.16    0.27 
  -3  -2   9   40.79    1.06 
  -3  -2   9   42.62    0.87 
  -3   2   9   41.05    1.03 
  -3   2   9   41.84    0.92 
  -2  -2   9   19.53    0.48 
  -2  -2   9   17.91    0.57 
  -2   2   9   18.84    0.53 
  -2   2   9   18.00    0.55 
  -1  -2   9    2.94    0.19 
  -1  -2   9    2.24    0.26 
  -1   2   9    1.71    0.19 
  -1   2   9    2.07    0.19 
   0  -2   9    2.32    0.25 
   0  -2   9    2.44    0.18 
   0   2   9    2.28    0.22 
   0   2   9    2.47    0.20 
   1  -2   9   -0.18    0.22 
   1  -2   9   -0.01    0.16 
   1   2   9   -0.01    0.12 
   1   2   9   -0.41    0.18 
   2  -2   9  122.47    2.38 
   2  -2   9  121.74    2.77 
  -2  -2  -9  119.26    2.62 
   2   2   9  122.79    2.70 
   2   2   9  126.18    2.39 
   3  -2   9    0.29    0.18 
  -3  -2  -9   -0.04    0.25 
   3  -2   9    0.01    0.22 
   3   2   9    0.15    0.19 
   4  -2   9   28.99    0.70 
  -4  -2  -9   28.81    0.81 
   4  -2   9   29.02    0.78 
   4   2   9   27.64    0.67 
   5  -2   9    4.01    0.31 
  -5  -2  -9    3.88    0.33 
   5  -2   9    3.95    0.26 
   5   2   9    3.34    0.25 
  -6  -2  -9    0.24    0.29 
   6  -2   9    0.17    0.28 
   6  -2   9    0.29    0.24 
   6   2   9    0.12    0.22 
  -7  -2  -9    0.47    0.31 
   7  -2   9    0.58    0.23 
  -7  -2  -9    0.71    0.21 
   7   2   9    0.35    0.24 
  -8  -2  -9   20.70    0.72 
   8  -2   9   20.90    0.62 
  -8  -2  -9   20.38    0.67 
   8   2   9   22.01    0.62 
   9  -2   9    0.10    0.27 
  -9  -2  -9   -0.24    0.34 
  -9  -2  -9    0.40    0.28 
   9   2   9    0.53    0.28 
  10  -2   9    0.55    0.32 
 -10  -2  -9    0.08    0.31 
 -10  -2  -9    0.13    0.37 
  10   2   9    0.34    0.29 
  11  -2   9    0.12    0.31 
 -11  -2  -9    0.18    0.40 
  11   2   9    0.11    0.31 
 -12  -2  -9    3.23    0.48 
  12  -2   9    3.07    0.40 
 -12   2  -9    3.26    0.47 
  12   2   9    3.03    0.37 
 -13  -2  -9    0.54    0.46 
  13  -2   9    0.85    0.40 
  13   2   9    0.88    0.37 
 -13   2  -9    1.11    0.48 
 -14  -2  -9    1.79    0.51 
  14  -2   9    0.73    0.39 
 -14   2  -9    1.16    0.46 
  14   2   9    0.83    0.40 
  15  -2   9   -0.61    0.44 
 -15  -2  -9    0.10    0.52 
 -15   2  -9   -0.63    0.57 
  15   2   9   -0.22    0.40 
 -15   2  -9   -0.11    0.52 
 -16  -2  -9    0.61    0.60 
  16  -2   9    0.50    0.48 
  16   2   9   -0.03    0.44 
  16  -3  -9   -0.25    0.51 
 -16  -3   9    0.81    0.61 
 -16   3   9   -0.34    0.65 
  15  -3  -9    0.86    0.52 
 -15  -3   9    1.19    0.61 
 -15   3   9    1.15    0.64 
 -14  -3   9    1.50    0.58 
  14  -3  -9    0.68    0.49 
 -14   3   9    1.11    0.60 
  13  -3  -9    3.28    0.47 
 -13  -3   9    2.89    0.60 
 -13   3   9    2.43    0.58 
  12  -3  -9    0.81    0.42 
 -12  -3   9    1.48    0.55 
 -12   3   9    1.18    0.52 
 -11  -3   9    5.79    0.59 
  11  -3  -9    5.60    0.46 
 -11   3   9    6.20    0.58 
 -10  -3   9    1.09    0.49 
  10  -3  -9    1.68    0.37 
 -10   3   9    0.99    0.33 
 -10   3   9    0.98    0.46 
  -9  -3   9   10.91    0.74 
   9  -3  -9   10.20    0.55 
  -9   3   9   11.74    0.67 
  -9   3   9   10.22    0.52 
  -8  -3   9    2.44    0.46 
  -8   3   9    2.57    0.31 
  -8   3   9    2.34    0.39 
  -7  -3   9    1.06    0.17 
  -7  -3   9    0.43    0.41 
  -7   3   9    1.06    0.28 
  -7   3   9    0.74    0.33 
  -6  -3   9   46.88    0.94 
   6  -3  -9   44.23    0.99 
  -6  -3   9   44.83    1.22 
  -6   3   9   43.70    1.00 
  -6   3   9   46.90    1.19 
   5  -3  -9    6.20    0.34 
  -5  -3   9    6.16    0.48 
  -5  -3   9    7.05    0.32 
  -5   3   9    7.49    0.48 
  -5   3   9    7.10    0.44 
  -4  -3   9    5.33    0.29 
  -4  -3   9    5.15    0.39 
   4  -3  -9    4.97    0.26 
  -4   3   9    4.58    0.29 
  -4   3   9    5.03    0.40 
   3  -3  -9   -0.56    0.21 
  -3  -3   9    0.15    0.29 
  -3  -3   9    0.16    0.15 
  -3   3   9    0.37    0.23 
  -3   3   9    0.15    0.22 
  -2  -3   9   12.91    0.49 
  -2  -3   9   12.78    0.38 
   2  -3  -9   12.94    0.48 
  -2   3   9   12.23    0.45 
  -2   3   9   12.88    0.47 
  -1  -3   9    5.84    0.38 
  -1  -3   9    5.99    0.31 
   1  -3  -9    5.58    0.31 
  -1   3   9    6.18    0.38 
  -1   3   9    5.77    0.30 
   0  -3  -9    5.84    0.33 
   0  -3   9    5.69    0.37 
   0  -3   9    5.86    0.33 
   0   3   9    6.28    0.23 
   0   3   9    5.21    0.38 
   1  -3   9    0.04    0.16 
  -1  -3  -9    0.42    0.26 
   1  -3   9    0.33    0.25 
   1   3   9   -0.30    0.20 
   2  -3   9   13.26    0.51 
   2  -3   9   13.25    0.43 
  -2  -3  -9   12.53    0.54 
   2   3   9   12.08    0.42 
   3  -3   9    1.37    0.27 
  -3  -3  -9    1.23    0.28 
   3  -3   9    1.15    0.19 
   3   3   9    1.19    0.20 
  -4  -3  -9    7.85    0.52 
   4  -3   9    8.58    0.41 
   4  -3   9    8.47    0.43 
   4   3   9    7.74    0.41 
   5  -3   9   27.42    0.69 
  -5  -3  -9   28.32    0.84 
   5  -3   9   28.46    0.79 
   5   3   9   27.77    0.67 
  -6  -3  -9    4.62    0.37 
   6  -3   9    4.61    0.31 
   6  -3   9    5.22    0.38 
   6   3   9    3.81    0.28 
   7  -3   9   17.82    0.64 
  -7  -3  -9   19.39    0.70 
   7  -3   9   18.38    0.57 
   7   3   9   18.08    0.56 
   8  -3   9    0.34    0.27 
  -8  -3  -9    1.29    0.36 
   8   3   9    1.02    0.27 
   9  -3   9    4.42    0.33 
  -9  -3  -9    4.50    0.43 
   9   3   9    4.21    0.32 
 -10  -3  -9    0.43    0.40 
  10  -3   9   -0.29    0.30 
  10   3   9    0.43    0.30 
 -11  -3  -9    0.60    0.43 
  11  -3   9    1.22    0.37 
  11   3   9    1.01    0.33 
 -12  -3  -9    2.20    0.48 
  12  -3   9    1.27    0.40 
  12   3   9    1.52    0.35 
  13  -3   9    2.18    0.44 
 -13  -3  -9    2.43    0.52 
  13   3   9    2.14    0.38 
 -13   3  -9    2.54    0.49 
  14  -3   9    0.44    0.40 
 -14  -3  -9    0.70    0.55 
  14   3   9    0.66    0.40 
 -14   3  -9    0.88    0.52 
  15  -3   9    0.46    0.48 
 -15  -3  -9    0.96    0.55 
  15   3   9    0.06    0.43 
 -15  -4   9    1.23    0.64 
  15  -4  -9   -0.08    0.50 
 -15   4   9   -0.23    0.70 
 -14  -4   9    2.42    0.63 
  14  -4  -9    1.16    0.49 
 -14   4   9    0.75    0.62 
 -13  -4   9    1.41    0.60 
  13  -4  -9    1.07    0.46 
 -13   4   9    0.58    0.58 
 -12  -4   9    0.69    0.57 
  12  -4  -9    0.56    0.46 
 -12   4   9    0.23    0.53 
 -11  -4   9   -0.06    0.55 
  11  -4  -9   -0.13    0.41 
 -11   4   9    0.35    0.51 
  10  -4  -9   11.94    0.62 
 -10  -4   9   10.71    0.77 
 -10   4   9   12.39    0.74 
   9  -4  -9    4.43    0.41 
  -9  -4   9    4.24    0.55 
  -9   4   9    4.21    0.46 
  -9   4   9    3.33    0.36 
   8  -4  -9    2.19    0.38 
  -8  -4   9    2.80    0.50 
  -8   4   9    2.14    0.33 
  -8   4   9    1.83    0.41 
  -7  -4   9   13.09    0.69 
  -7   4   9   14.40    0.58 
  -7   4   9   15.05    0.62 
  -6  -4   9    2.12    0.42 
  -6   4   9    1.67    0.34 
  -6   4   9    1.22    0.29 
  -5  -4   9   -0.38    0.14 
   5  -4  -9   -0.39    0.19 
  -5  -4   9    0.18    0.36 
  -5   4   9   -0.27    0.26 
  -5   4   9    0.18    0.28 
   4  -4  -9   14.84    0.49 
  -4  -4   9   13.36    0.39 
  -4  -4   9   15.29    0.60 
  -4   4   9   14.17    0.54 
  -4   4   9   14.53    0.53 
  -3  -4   9   21.41    0.69 
   3  -4  -9   21.12    0.62 
  -3  -4   9   20.53    0.51 
  -3   4   9   21.52    0.63 
  -3   4   9   20.68    0.62 
  -2  -4   9   15.36    0.59 
   2  -4  -9   16.93    0.57 
  -2  -4   9   15.81    0.46 
  -2   4   9   16.36    0.55 
  -2   4   9   16.50    0.50 
  -1  -4   9   20.88    0.54 
  -1  -4   9   20.97    0.66 
   1  -4  -9   20.97    0.66 
  -1   4   9   20.79    0.57 
  -1   4   9   20.74    0.56 
   0  -4   9    4.81    0.40 
   0  -4   9    4.84    0.34 
   0  -4  -9    5.68    0.33 
   0   4   9    5.18    0.35 
   0   4   9    5.87    0.24 
  -1  -4  -9    8.14    0.50 
   1  -4   9    8.48    0.39 
   1  -4   9    8.28    0.45 
   1   4   9    8.07    0.38 
   2  -4   9    1.25    0.31 
  -2  -4  -9    1.08    0.30 
   2  -4   9    2.09    0.21 
   2   4   9    1.16    0.24 
   3  -4   9   11.50    0.51 
  -3  -4  -9   11.44    0.58 
   3  -4   9   11.91    0.45 
   3   4   9   11.36    0.42 
   4  -4   9    7.57    0.47 
  -4  -4  -9    7.86    0.56 
   4  -4   9    7.78    0.43 
   4   4   9    8.43    0.42 
   5  -4   9   16.24    0.61 
   5  -4   9   16.34    0.57 
  -5  -4  -9   16.62    0.63 
   5   4   9   16.57    0.54 
   6  -4   9   -0.24    0.34 
   6  -4   9    0.22    0.27 
  -6  -4  -9   -0.08    0.30 
   6   4   9    0.16    0.25 
  -7  -4  -9   13.29    0.66 
   7  -4   9   13.53    0.59 
   7  -4   9   13.22    0.51 
   7   4   9   11.99    0.49 
  -8  -4  -9    6.09    0.45 
   8  -4   9    5.36    0.37 
   8   4   9    6.22    0.43 
   9  -4   9    1.94    0.35 
  -9  -4  -9    2.06    0.43 
   9   4   9    1.79    0.29 
 -10  -4  -9    0.47    0.43 
  10  -4   9    1.07    0.36 
  10   4   9    0.45    0.30 
 -11  -4  -9    0.31    0.45 
  11  -4   9    0.61    0.38 
  11   4   9   -0.07    0.34 
  12  -4   9    0.11    0.36 
 -12  -4  -9    0.04    0.48 
  12   4   9   -0.01    0.37 
  13  -4   9    0.59    0.43 
 -13  -4  -9    0.39    0.51 
  13   4   9    1.27    0.37 
  14  -4   9    0.12    0.47 
 -14  -4  -9   -0.72    0.57 
 -14   4  -9   -0.21    0.50 
  14   4   9   -0.38    0.40 
 -15  -4  -9    0.69    0.62 
  15  -4   9    0.47    0.50 
  15   4   9    0.54    0.44 
 -15  -5   9    3.47    0.75 
  15  -5  -9    1.29    0.54 
 -15   5   9    0.89    0.68 
  14  -5  -9    1.41    0.52 
 -14  -5   9    2.65    0.71 
 -14   5   9    1.48    0.65 
  13  -5  -9    1.31    0.50 
 -13  -5   9    0.73    0.66 
 -13   5   9    0.23    0.59 
 -12  -5   9    2.55    0.66 
 -12  -5   9    2.82    0.54 
  12  -5  -9    3.35    0.50 
 -12   5   9    3.08    0.62 
 -11  -5   9    1.65    0.50 
 -11  -5   9    0.46    0.60 
  11  -5  -9    0.82    0.44 
 -11   5   9    0.70    0.54 
  10  -5  -9    7.92    0.51 
 -10  -5   9    6.63    0.67 
 -10   5   9    7.63    0.58 
  -9  -5   9    1.54    0.56 
   9  -5  -9    1.77    0.41 
  -9   5   9    1.26    0.43 
  -9   5   9    0.83    0.36 
  -8  -5   9    9.19    0.71 
   8  -5  -9    9.77    0.60 
  -8   5   9    9.81    0.66 
  -8   5   9    9.13    0.57 
  -7  -5   9   -0.47    0.45 
  -7   5   9    0.70    0.37 
  -7   5   9    0.17    0.32 
  -6  -5   9    1.76    0.45 
  -6   5   9    1.36    0.29 
  -6   5   9    1.15    0.33 
  -5  -5   9   -0.24    0.40 
   5  -5  -9    0.49    0.21 
  -5   5   9    0.20    0.28 
  -5   5   9    0.77    0.30 
  -4  -5   9    0.28    0.37 
   4  -5  -9    0.87    0.24 
  -4  -5   9    0.52    0.13 
  -4   5   9    0.65    0.27 
  -4   5   9    0.44    0.29 
   3  -5  -9    6.11    0.45 
  -3  -5   9    6.14    0.30 
  -3  -5   9    6.21    0.44 
  -3   5   9    6.44    0.42 
  -3   5   9    6.31    0.38 
  -2  -5   9    6.98    0.33 
  -2  -5   9    7.56    0.48 
   2  -5  -9    6.82    0.46 
  -2   5   9    6.89    0.42 
  -2   5   9    7.23    0.39 
   1  -5  -9    1.24    0.28 
  -1  -5   9    1.25    0.34 
  -1  -5   9    1.61    0.18 
  -1   5   9    1.53    0.25 
  -1   5   9    1.50    0.20 
   0  -5  -9   25.70    0.78 
   0  -5   9   23.09    0.60 
   0  -5   9   23.08    0.75 
   0   5   9   23.45    0.67 
  -1  -5  -9    0.41    0.31 
   1  -5   9    0.36    0.20 
   1  -5   9    0.42    0.33 
   1   5   9   -0.24    0.22 
   2  -5   9    0.74    0.21 
   2  -5   9    0.30    0.34 
  -2  -5  -9    0.61    0.33 
   2   5   9    0.96    0.26 
  -3  -5  -9    0.46    0.34 
   3  -5   9   -0.35    0.30 
   3  -5   9    0.10    0.22 
   3   5   9   -0.13    0.24 
   4  -5   9    2.49    0.27 
   4  -5   9    3.06    0.39 
  -4  -5  -9    2.49    0.38 
   4   5   9    2.47    0.28 
   5  -5   9    0.91    0.27 
   5  -5   9    1.14    0.38 
  -5  -5  -9    0.94    0.38 
   5   5   9    0.55    0.26 
   6  -5   9   20.70    0.68 
  -6  -5  -9   20.90    0.82 
   6  -5   9   20.19    0.73 
   6   5   9   21.84    0.66 
   7  -5   9    1.02    0.41 
  -7  -5  -9    0.91    0.41 
   7  -5   9    1.08    0.29 
   7   5   9    0.88    0.28 
  -8  -5  -9    3.52    0.46 
   8  -5   9    3.53    0.37 
   8  -5   9    4.58    0.49 
   8   5   9    3.54    0.33 
  -9  -5  -9    5.41    0.51 
   9  -5   9    5.09    0.43 
   9   5   9    5.66    0.35 
 -10  -5  -9    7.59    0.56 
  10  -5   9    7.34    0.47 
  10   5   9    6.43    0.47 
  11  -5   9    0.95    0.41 
 -11  -5  -9    1.27    0.50 
  11   5   9    1.26    0.34 
 -12  -5  -9    1.16    0.53 
  12  -5   9    0.94    0.44 
  12   5   9    0.18    0.37 
 -13  -5  -9    0.03    0.54 
  13  -5   9   -0.25    0.45 
  13   5   9   -0.61    0.38 
 -14  -5  -9    0.71    0.61 
  14  -5   9    0.25    0.48 
 -14  -6   9    0.34    0.75 
  14  -6  -9   -0.01    0.54 
 -14   6   9   -0.23    0.66 
 -13  -6   9    0.82    0.73 
  13  -6  -9    0.76    0.52 
 -13  -6   9   -0.10    0.58 
 -13   6   9    0.85    0.62 
 -12  -6   9   -0.01    0.52 
  12  -6  -9    0.37    0.50 
 -12  -6   9   -0.28    0.69 
 -12   6   9   -0.31    0.59 
 -11  -6   9    0.43    0.54 
  11  -6  -9    0.96    0.47 
 -11  -6   9   -0.39    0.65 
 -11   6   9   -0.18    0.52 
  10  -6  -9    0.68    0.46 
 -10  -6   9    0.59    0.49 
 -10  -6   9    0.37    0.62
[truncated: 231,846 more chars]
